# Supplementary material for: Spatially distributed freshwater demand for electricity in Africa
Source: Royal Society of Chemistry journal article supplement (doi:10.1039/d4ew00246f), 2024-01-01
Supplement: d4ew00246f1.xlsx [file d4ew00246f1.xlsx]

## Sheet: Info
Worksheet:
Main - power plant database	column	description
	ID_Number	number of power plant
	Country	country power plant location
	Plant	name of power plant
	MW	capacity
	MWh/MW
	MWh	Electricty produced in 2020
	GEN_TYPE	Fuel type
	Operation	operation cycles
	Infrastructure	Infrastructure
	Cooling System	info on cooling 1
	Cooling Fluid	info on cooling 2
	Specific Fuel	specific on fuel
	Climate	climate zone based on the Köppen-Geiger classification
	Withdrawal	withdrawal (WW) in m3
	Consumption	consumption (WC) in m3
	Longitude	coordinate longitude
	Latitude	coordinate lattitude
	details	details including reference for more information on the power plant
Hydro_OWS	Details on Hydro OWS - Open Water Surfaces
Hydro_EV	Hydro: monthly evaporation values
Water_intensities	More details on water intensities. Extended information regarding to Table 2 in main paper
Withdrawal WIs	Data/literature references for water intensities WW
Consumptive WIs	Data/literature references for water intensities WC

## Sheet: Main
ID_Number	Country	Plant	MW	MWh/MW	MWh	GEN_TYPE	Operation	Infrastructure	Cooling System	Cooling Fluid	Specific Fuel	Climate	Withdrawal	Consumption	Longitude	Latitude	details
1001	ALGERIA	ADRAR	40	3888	155520	NG	Rankine	Steam Turbine	Wet tower	Freshwater	Natural Gas, HFO	BWh - Desert Hot	712336	568102	-0.154227	28.2079	Refinery of Adrar
1002	ALGERIA	ADRAR	9.6	1241.5	11918.4	Oil	ICE	Diesel-Engines	Dry cooling	Air	Diesel, HFO	NA	3861.56	2703.09	-0.154227	28.2079	Refinery of Adrar, it is not visible, but I assume it is a combustion engine
1003	ALGERIA	ADRAR SOLAR	20	1389.2	27784	Sun	PV	Land	No cooling	NA	Flat	BWh - Desert Hot	2734.52	1914.16	-0.317447	27.9076	Desert.
1004	ALGERIA	AFRA	0.32	1241.5	397.28	Oil	ICE	Diesel-Engines	Dry cooling	Air	Diesel	NA	128.719	90.103	7.80307	25.3314	https://www.openstreetmap.org/way/313989761#map=16/25.3315/7.8036
1005	ALGERIA	AIN ARNAT	1014	3888	3942432	NG	Combined	Combined Cycle (CC)	Dry cooling	Air	Natural Gas, Diesel	NA	149237	104466	5.20655	36.1576	Operational in 2019. Air cooling. https://www.gem.wiki/Ain_Arnet_power_plant
1006	ALGERIA	AIN BELBEL	1.82	3888	7076.16	NG	ICE	Gas-Engines	Dry cooling	Air	Natural Gas	NA	2292.67	1604.87	1.17335	27.8731	Was marked as solar power, but in the location there are only MCI
1007	ALGERIA	AIN DJASSER	794	3888	3087072	NG	Brayton	Gas Turbine	No cooling	NA	Natural Gas, HFO	NA	4.96648e+06	3.97319e+06	6.02624	35.8665	Upgraded to 794 MW, six gas turbines. https://www.gem.wiki/Ain_Djasser_power_plant
1008	ALGERIA	AIN EL BYA	300	3888	1166400	NG	Rankine	Steam Turbine	Once through	Saline	Natural Gas, HFO	NA	44153	29393.3	-0.294236	35.8242	No easy to find. No listed in power plants of Algeria. Liekly in this place due to the inlet and outlet of saline water for the cooling
1009	ALGERIA	ALGER PORT	80	3888	311040	NG	Rankine	Steam Turbine	Once through	Saline	Natural Gas	NA	11774.1	7838.2	3.06551	36.7607	80 MW, coast
1010	ALGERIA	ALRAR FIELD	55.5	3888	215784	NG	Brayton	Gas Turbine	No cooling	NA	Natural Gas, HFO	NA	347153	277723	9.78821	28.6413	Gas field
1011	ALGERIA	AMIZOUR (EL KSEUR)	183	3888	711504	NG	Brayton	Gas Turbine	No cooling	NA	Natural Gas	NA	1.14467e+06	915734	4.87887	36.6503	four gas portable gas turbines. https://www.gem.wiki/El-Kseur_power_station
1012	ALGERIA	ANNABA	199	3888	773712	NG	Brayton	Gas Turbine	No cooling	NA	Natural Gas	NA	1.24475e+06	995798	7.76344	36.892	Two GT. No information on the web. Assume is NG because there is an NG port nearby
1013	ALGERIA	AOULEF	7.6	1241.5	9435.4	Oil	ICE	Diesel-Engines	Dry cooling	Air	Diesel	NA	3057.07	2139.95	1.08333	26.95	I cannot find it, but because its size and fuel it must be a combustion engine with diesel
1014	ALGERIA	AOULEF SOLAR	5	1389.2	6946	Sun	PV	Land	No cooling	NA	Flat	BWh - Desert Hot	683.63	478.541	1.0726	26.9576	Desert. https://wikimapia.org/37147729/Aoulef-Solar-Field
1015	ALGERIA	ARZEW AMMONIA	10.5	3888	40824	NG	ICE	Gas-Engines	Dry cooling	Air	Natural Gas	NA	13227	9258.88	-0.324465	35.8255	Three units
1016	ALGERIA	ARZEW LNG PLANT	15.9	3888	61819.2	NG	Brayton	Gas Turbine	No cooling	NA	Natural Gas	NA	99454.7	79563.8	-0.243755	35.8049	Four GT units near the coast in the LNG export Plant
1017	ALGERIA	BAB-EZZOUAR	628	3888	2441664	NG	Brayton	Gas Turbine	No cooling	NA	Natural Gas	NA	3.92815e+06	3.14252e+06	3.18485	36.7297	Four units of gas turbines. No cooling
1018	ALGERIA	BADJI BORDJ MOKHTAR	6	3888	23328	NG	Brayton	Gas Turbine	No cooling	NA	Natural Gas	NA	37530.1	30024.1	0.934382	21.352	Group of movable turbines
1019	ALGERIA	BECHAR	15	3888	58320	NG	Brayton	Gas Turbine	No cooling	NA	Natural Gas	NA	93825.2	75060.2	-2.26195	31.5842	Sonelgaz SPE installations. In 2023 there is the inclusion of more gas units
1020	ALGERIA	BECHAR	69.9	1241.5	86780.9	Oil	ICE	Diesel-Engines	Dry cooling	Air	Diesel	NA	28117	19681.9	-2.26195	31.5842	Sonelgaz SPE installations
1021	ALGERIA	BENI ABBES	39.4	1241.5	48915.1	Oil	ICE	Diesel-Engines	Dry cooling	Air	Diesel	NA	15848.5	11093.9	-2.19031	30.1094	Power plant near the town
1022	ALGERIA	BENI ABBES SPE	115	3888	447120	NG	Brayton	Gas Turbine	No cooling	NA	Natural Gas	NA	719327	575461	-2.19031	30.1094	Power plant near the town
1023	ALGERIA	BERKINE BASIN	7	3888	27216	NG	Brayton	Gas Turbine	No cooling	NA	Natural Gas	NA	43785.1	35028.1	8.17142	31.0134	Two units of gas turbines
1024	ALGERIA	BERROUAGHIA	490	3888	1905120	NG	Brayton	Gas Turbine	No cooling	NA	Natural Gas, HFO	NA	3.06496e+06	2.45197e+06	2.93022	36.1401	Two units of gas turbines with no cooling. https://www.gem.wiki/Berrouaghia_power_plant
1025	ALGERIA	BIR EL-DJIR	75	3888	291600	NG	Brayton	Gas Turbine	No cooling	NA	Natural Gas	NA	469126	375301	-0.569966	35.7145	Two large turbines in the city
1026	ALGERIA	BIR REBAA PLANT	19.96	3888	77604.5	NG	Brayton	Gas Turbine	No cooling	NA	Natural Gas	NA	124850	99880.1	8.56671	31.2309	Small units in the Oil and Gas Complex
1027	ALGERIA	BORDJ BADJI MOKHTAR	18.62	1389.2	25866.9	Sun	PV	Land	No cooling	NA	Flat	BWh - Desert Hot	2545.84	1782.09	0.920474	21.3493	Desert
1028	ALGERIA	BORDJ EL HOUAS	2.102	1241.5	2609.63	Oil	ICE	Diesel-Engines	Dry cooling	Air	Diesel	NA	845.52	591.864	8.43782	24.8913	https://www.openstreetmap.org/way/388002600#map=14/24.8864/8.4402
1029	ALGERIA	BORDJ OMAR DRISS	4.35	1389.2	6043.02	Sun	PV	Land	No cooling	NA	Flat	BWh - Desert Hot	594.758	416.331	6.80847	28.1835	Desert
1030	ALGERIA	BOUFARIK (Boufarik 2)	750	3888	2916000	NG	Brayton	Gas Turbine	No cooling	NA	Natural Gas, HFO	NA	4.69126e+06	3.75301e+06	2.87854	36.5969	Three gas turbine units. No cooling. https://www.gem.wiki/Boufarik_2_power_plant
1031	ALGERIA	BOUTELILIS	445	3888	1730160	NG	Brayton	Gas Turbine	No cooling	NA	Natural Gas	NA	2.78348e+06	2.22679e+06	-0.938583	35.5665	Near lake, two large gas turbines. https://www.gem.wiki/Boutl%C3%A9lis_power_station
1032	ALGERIA	CENTRALE ÉLECTRIQUE DE BELLARA	1399	3888	5439312	NG	Combined	Combined Cycle (CC)	Dry cooling	Air	Natural Gas	NA	205900	144130	6.25301	36.7307	Combined cycle, Gas turbines and then rankine with two large dry cooling. https://www.sonelgaz.dz/fr/2034/le-ministre-de-lenergie-en-visite-dans-les-wilayas-de-naama-et-del-bayadh https://www.gem.wiki/Bellara_power_station
1033	ALGERIA	DEB DEB	4.9	1389.2	6807.08	Sun	PV	Land	No cooling	NA	Flat	BWh - Desert Hot	669.958	468.97	8.57501	31.2205	Desert
1034	ALGERIA	DERGUINAH	71.5	316.344	22618.6	Hydropower	Dammed	NA	NA	NA	NA	NA	12051.6	12051.6	5.29806	36.5719	Small reservoir in the mountains called the Barrage Ighzer Ouftis. According to topography is not so elevated to produce this amount of electricity, but likely the maps are wrong. In pictures it seems that there is a recreational use of the reservoir, but I cannot find a suitable data for allocation.
1035	ALGERIA	DJANET	19.5	1389.2	27089.4	Sun	PV	Land	No cooling	NA	Flat	BWh - Desert Hot	2666.16	1866.31	9.45958	24.4898	Desert.
1036	ALGERIA	EL OUED	620	3888	2410560	NG	Brayton	Gas Turbine	No cooling	NA	Natural Gas	NA	3.87811e+06	3.10249e+06	6.75263	33.2754	Eight units of gas turbines. Fuel directly from the pipeline that passes through there. It seems like it has been decommissioned or abandoned as the places where the turbines should be are empty (CONFIRMED, they were decommissioned since mid 2021).
1037	ALGERIA	EL-ABIODH	0.92	1241.5	1142.18	Oil	ICE	Diesel-Engines	Dry cooling	Air	Diesel	NA	370.066	259.046	0.548388	32.893	By the size and fuel, it must be a small MCI generator
1038	ALGERIA	EL-GOLEA	40	3888	155520	NG	Brayton	Gas Turbine	No cooling	NA	Natural Gas	NA	250201	200160	2.90252	30.6075	Two medium size power plants next to each other. The first of ICE, the second of Gas turbines
1039	ALGERIA	EL-GOLEA	17.8	1241.5	22098.7	Oil	ICE	Diesel-Engines	Dry cooling	Air	Diesel	NA	7159.97	5011.98	2.90022	30.6067	Two medium size power plants next to each other. The first of ICE, the second of Gas turbines
1040	ALGERIA	EL-HADJAR COMPLEX	53	3888	206064	NG	Brayton	Gas Turbine	No cooling	NA	Natural Gas	NA	331516	265213	7.70132	36.7952	In El-Hadjar Complex to produce electricity for the smealting plant. https://www.gem.wiki/Sider_El_Hadjar_Annaba_steel_plant
1041	ALGERIA	EL-HADJAR COMPLEX	97.728	1241.5	121329	Oil	Rankine	Steam Turbine	Wet Tower	Freshwater	HFO	Csa - Temperate Dry Summer	299911	234234	7.70132	36.7952	In El-Hadjar Complex to produce electricity for the smealting plant. https://www.gem.wiki/Sider_El_Hadjar_Annaba_steel_plant
1042	ALGERIA	EL-OUED	6	1241.5	7449	Oil	ICE	Diesel-Engines	Dry cooling	Air	Diesel	NA	2413.47	1689.43	6.86319	33.3561	Likely diesel engines in one of the buildings next to the NG sonelgaz plant
1043	ALGERIA	ERRAGUENE	16	316.344	5061.51	Hydropower	Dammed	NA	NA	NA	NA	NA	4.32547e+06	4.32547e+06	5.57861	36.5853	reservoir
1044	ALGERIA	F'KIRINA	300	3888	1166400	NG	Brayton	Gas Turbine	No cooling	NA	Natural Gas, HFO	NA	1.8765e+06	1.5012e+06	7.3619	35.7666	Two gas turbine units. More to north, south of Ain Beida, no cooling. https://www.gem.wiki/F%27Krina_power_station
1045	ALGERIA	GHARDAIA	17	3888	66096	NG	Brayton	Gas Turbine	No cooling	NA	Natural Gas, HFO	NA	106335	85068.2	3.88811	32.5763	Small building with the turbines. Likely using only NG from the field
1046	ALGERIA	GHARDAIA SOLAR	1.1	1389.2	1528.12	Sun	PV	Rooftop	No cooling	NA	Flat	BWh - Desert Hot	21.4029	14.982	3.67384	32.4902	Cannot find it
1047	ALGERIA	GOURIET	6.5	316.344	2056.24	Hydropower	ROR	NA	NA	NA	NA	NA	620.28	620.28	4.18935	36.4099	reservoir
1048	ALGERIA	HADJRET EN NOUSS	1260	3888	4898880	NG	Combined	Combined Cycle (CC)	Once through	Saline	Natural Gas, HFO	NA	185443	129810	2.07926	36.5758	Three rankine units with once through cooling from the Mediterranean. https://www.gem.wiki/Hadjret_En_Nouss_power_plant
1049	ALGERIA	HAMIZ	2.2	316.344	695.958	Hydropower	Dammed	NA	NA	NA	NA	NA	379541	379541	3.35192	36.6056	reservoir
1050	ALGERIA	HAMMA	588	3888	2286144	NG	Brayton	Gas Turbine	No cooling	NA	Natural Gas, HFO	NA	3.67795e+06	2.94236e+06	3.08246	36.749	Two units of gas turbines between roads near the coast. The wiki indicates that the nominal capacity is only 418 MW https://www.gem.wiki/Hamma_2_power_plant
1051	ALGERIA	HAOUD EL HAMRA	22	3888	85536	NG	Brayton	Gas Turbine	No cooling	NA	Natural Gas, HFO	NA	137610	110088	5.98056	31.8914	Three units of gas turbines. Considering it is a passing NG and Oil pipeline, Likely NG
1052	ALGERIA	HAOUD EL HAMRA SP1	10.7	3888	41601.6	NG	Brayton	Gas Turbine	No cooling	NA	Natural Gas, HFO	NA	66928.7	53542.9	5.98056	31.8914	Two units of gas turbines. Considering it is a passing NG and Oil pipeline, Likely NG
1053	ALGERIA	HASSI BERKINE	39	1241.5	48418.5	Oil	ICE	Diesel-Engines	Dry cooling	Air	HFO	NA	15687.6	10981.3	8.17003	31.0129	Dry Area. Rack of fans.
1054	ALGERIA	HASSI BERKINE SOUTH	400	3888	1555200	NG	Brayton	Gas Turbine	No cooling	NA	Natural Gas	NA	2.50201e+06	2.0016e+06	8.02992	30.8236	https://www.gem.wiki/Hassi_Berkine_South_Gas_Station
1055	ALGERIA	HASSI MESSAOUD NORD I	125	3888	486000	NG	Brayton	Gas Turbine	No cooling	NA	Natural Gas	NA	781877	625501	6.02322	31.761	Four units of GT. No indication of fuels, considering that it is a gas field, assume Natural Gas only
1056	ALGERIA	HASSI MESSAOUD NORD II	200	3888	777600	NG	Brayton	Gas Turbine	No cooling	NA	Natural Gas	NA	1.251e+06	1.0008e+06	6.05181	31.7876	Two units of GT. https://www.gem.wiki/Hassi_Messaoud_Nord_2_power_plant
1057	ALGERIA	HASSI MESSAOUD NORD III	660	3888	2566080	NG	Brayton	Gas Turbine	No cooling	NA	Natural Gas	NA	4.12831e+06	3.30265e+06	5.99631	31.8059	Three units of GT. https://www.gem.wiki/Hassi_Messaoud_Nord_3_power_plant
1058	ALGERIA	HASSI MESSAOUD OUEST	495.1	3888	1.92495e+06	NG	Brayton	Gas Turbine	No cooling	NA	Natural Gas	NA	3.09686e+06	2.47749e+06	6.13333	31.8	Four units of GT. https://www.gem.wiki/Hassi_Messoud_Ouest_power_plant
1059	ALGERIA	HASSI MESSAOUD SONATRACH	11.4	3888	44323.2	NG	Brayton	Gas Turbine	No cooling	NA	Natural Gas	NA	71307.2	57045.7	6.0528	31.6698	Four Smaller units of GT. No indication of fuels, considering that it is a gas field, assume Natural Gas only
1060	ALGERIA	HASSI MESSAOUD SUD	72	3888	279936	NG	Brayton	Gas Turbine	No cooling	NA	Natural Gas	NA	450361	360289	6.04986	31.7882	Smaller units of GT. No indication of fuels, considering that it is a gas field, assume Natural Gas only
1061	ALGERIA	HASSI R'MEL SUD SONA	12.44	3888	48366.7	NG	ICE	Gas-Engines	Dry cooling	Air	Natural Gas	NA	15670.8	10969.6	3.23598	32.9397	Sonatrach, near the gas field. It seems like a number of MCI
1062	ALGERIA	IDLESS	2.442	3888	9494.5	NG	ICE	Gas-Engines	Dry cooling	Air	Natural Gas	NA	3076.21	2153.35	5.93208	23.8337	By the size and fuel, it must be a small MCI generator https://www.openstreetmap.org/way/274730980#map=15/23.8271/5.9313
1063	ALGERIA	IHRIR	0.48	1241.5	595.92	Oil	ICE	Diesel-Engines	Dry cooling	Air	Diesel	NA	193.078	135.155	8.40669	25.408	By the size and fuel, it must be a small MCI generator
1064	ALGERIA	IHRIR	0.013	1389.2	18.0596	Sun	PV	Land	No cooling	NA	Flat	BWh - Desert Hot	1.77744	1.24421	8.40891	25.4021	Small solar field
1065	ALGERIA	ILLIZI	13.48	1241.5	16735.4	Oil	ICE	Diesel-Engines	Dry cooling	Air	Diesel	NA	5422.27	3795.59	8.47613	26.5123	Combination of types of ICE. Probably one or two gas turbines, but it is not clear by the images
1066	ALGERIA	IN GUEZZAM	5.1	1389.2	7084.92	Sun	PV	Land	No cooling	NA	Flat	BWh - Desert Hot	697.303	488.112	-5.39396	28.1934	Desert.
1067	ALGERIA	IN SALAH	9.4	1241.5	11670.1	Oil	ICE	Diesel-Engines	Dry cooling	Air	Diesel	NA	3781.11	2646.78	2.4983	27.1817	Likely diesel engines in one of the buildings next to the NG sonelgaz plant
1068	ALGERIA	IN SALAH (GRTE SONELGAZ)	92	3888	357696	NG	Brayton	Gas Turbine	No cooling	NA	Natural Gas	NA	575461	460369	2.4983	27.1817	Six small brayton units in the NG Sonelgaz plant
1069	ALGERIA	IN-AMENAS GAS PLANT	78.9	3888	306763	NG	Brayton	Gas Turbine	No cooling	NA	Natural Gas	NA	493521	394817	9.54112	28.0437	Five small units installed in the NG plant in In-Amenas
1070	ALGERIA	IRHIL EMDA	24	316.344	7592.27	Hydropower	Dammed	NA	NA	NA	NA	NA	1.91502e+06	1.91502e+06	5.2722	36.4556	reservoir
1071	ALGERIA	JIJEL	588	3888	2286144	NG	Rankine	Steam Turbine	Once through	Saline	Natural Gas, HFO	NA	86540	57610.8	5.876	36.8139	Three units of steam turbines. Once through with sea water. https://www.gem.wiki/Jijel_power_station
1072	ALGERIA	KABERTENE	3	1389.2	4167.6	Sun	PV	Land	No cooling	NA	Flat	BWh - Desert Hot	410.178	287.125	-0.046832	28.4515	Desert.
1073	ALGERIA	KABERTENE	10.2	1902	19400.4	Wind	Wind turbine	Onshore	No cooling	NA	NA	NA	0.00257035	0.00257035	-0.0576	28.4624	https://www.gem.wiki/Kabertene_wind_farm
1074	ALGERIA	KAHRAMA	345	3888	1341360	NG	Brayton	Gas Turbine	No cooling	NA	Natural Gas	NA	2.15798e+06	1.72638e+06	-0.247302	35.8066	coast, desalination plant. https://www.gem.wiki/Kahrama_power_station
1075	ALGERIA	KAIS	633	3888	2461104	NG	Combined	Combined Cycle (CC)	Dry cooling	Air	Natural Gas, HFO	NA	93162.9	65214	6.86969	35.5503	Operational in 2019. https://www.gem.wiki/Kais_power_station
1076	ALGERIA	KERZAZ	7.638	1389.2	10610.7	Sun	PV	Land	No cooling	NA	Flat	BWh - Desert Hot	1044.31	731.019	-0.519345	29.3001	Desert.
1077	ALGERIA	KOUDIET EDDRAOUCH	1200	3888	4665600	NG	Combined	Combined Cycle (CC)	Once through	Saline	Natural Gas, HFO	NA	176612	123629	8.0778	36.885	coast. https://www.gem.wiki/Koudiet_Eddraouch_power_plant
1078	ALGERIA	KRECHBA	83.4	3888	324259	NG	Brayton	Gas Turbine	No cooling	NA	Natural Gas	NA	521668	417335	2.21225	29.0871	I cannot see it with certainty, but it is likely a set of gas turbines working on the krechba Center for the NG field
1079	ALGERIA	LABREG	422	3888	1640736	NG	Brayton	Gas Turbine	No cooling	NA	Natural Gas, HFO	NA	2.63962e+06	2.11169e+06	6.98476	34.5056	422 MW https://www.gem.wiki/Labreg_power_plant
1080	ALGERIA	LARBAA	560	3888	2177280	NG	Brayton	Gas Turbine	No cooling	NA	Natural Gas	NA	3.50281e+06	2.80225e+06	3.13743	36.599	Four units of gas turbines with no cooling. https://www.gem.wiki/Larbaa_power_plant
1081	ALGERIA	MANSOURIA	100	316.344	31634.4	Hydropower	Dammed	NA	NA	NA	NA	NA	0	0	5.575	36.5806	Dam and weir
1082	ALGERIA	MARSAT EL HADJADJ	840	3888	3265920	NG	Rankine	Steam Turbine	Once through	Saline	Natural Gas, HFO	NA	123629	82301.1	-0.1924	35.8	Five steam turbine units. Once through cooling. coast, 840 MW. https://www.gem.wiki/Marsat_El_Hadjadj_Steam_power_plant
1083	ALGERIA	MEDEA FACTORY	20	1241.5	24830	Oil	ICE	Diesel-Engines	Dry cooling	Air	Diesel	NA	8044.91	5631.44	2.81667	36.25	City. As the name does not indicate the specific factory, it is not possible to find. Likely a diesel engine for the factory.
1084	ALGERIA	MEFFROUCH	1.678	316.344	530.826	Hydropower	Dammed	NA	NA	NA	NA	NA	188387	188387	-1.2887	34.8494	reservoir
1085	ALGERIA	MESDAR FIELD	4	3888	15552	NG	ICE	Gas-Engines	Dry cooling	Air	Natural Gas	NA	5038.84	3527.19	6.79173	31.192	Natural gas and Oil Field. Due to its infrastructure I assume it is a combustion engine
1086	ALGERIA	M'GUIDEN	0.986	3888	3833.57	NG	ICE	Gas-Engines	Dry cooling	Air	Natural Gas	NA	1242.08	869.453	1.55041	29.5221	Marked as solar, but in reality MCI
1087	ALGERIA	M'SILA	730	3888	2838240	NG	Brayton	Gas Turbine	No cooling	NA	Natural Gas	NA	4.56616e+06	3.65293e+06	4.47678	35.7089	Two sets of gas turbines. One with two gas turbines and the other with three smaller. https://www.gem.wiki/M%27Sila_power_station
1088	ALGERIA	OUM EL ASSEL	5.03	1389.2	6987.68	Sun	PV	Land	No cooling	NA	Flat	BWh - Desert Hot	687.732	481.412	-5.39396	28.1934	Cannot find it. By the size and place I assume Land and Desert
1089	ALGERIA	OUMACHE	450	3888	1749600	NG	Brayton	Gas Turbine	No cooling	NA	Natural Gas, HFO	NA	2.81476e+06	2.25181e+06	5.88929	34.441	Starting 2021 there are two combined cycle units. See document PP Oumache Siemens builds additionally 1600 MW https://www.gem.wiki/Oumache_power_station
1090	ALGERIA	PLAST PAPER	1	3888	3888	NG	ICE	Gas-Engines	Dry cooling	Air	Natural Gas	NA	1259.71	881.798	-0.630799	35.6971	By the size and fuel, it must be a small MCI generator
1091	ALGERIA	RAS DJINET	672	3888	2612736	NG	Rankine	Steam Turbine	Once through	Saline	Natural Gas	NA	98902.8	65840.9	3.69639	36.8481	Coast. Part of the Ras Djinet Complex. Four Steam turbines and three Combined cycles. https://www.gem.wiki/Ras_Djinet_power_plant
1092	ALGERIA	RAS DJINET	1200	3888	4665600	NG	Combined	Combined Cycle (CC)	Once through	Saline	Natural Gas	NA	176612	123629	3.69639	36.8481	Coast. Part of the Ras Djinet Complex. Four Steam turbines and three Combined cycles. https://www.gem.wiki/Ras_Djinet_power_plant
1093	ALGERIA	RAS DJINET	4.16	1241.5	5164.64	Oil	ICE	Diesel-Engines	Dry cooling	Air	Diesel	NA	1673.34	1171.34	3.69019	36.8452	Cannot find it. By the size and place I assume MCI and Diesel
1094	ALGERIA	RAVIN BLANC	132	3888	513216	NG	Rankine	Steam Turbine	Once through	Saline	Natural Gas, HFO	NA	19427.3	12933	-0.631915	35.7096	coast. https://www.gem.wiki/Ravin_Blanc_power_plant
1095	ALGERIA	REGGANE	5	1389.2	6946	Sun	PV	Land	No cooling	NA	Flat	BWh - Desert Hot	683.63	478.541	0.13687	26.7681	Desert. https://www.otec-engineering.com/project/reggane-solar-plant---5mw---algeria
1096	ALGERIA	RELIZANE	450	3888	1749600	NG	Brayton	Gas Turbine	No cooling	NA	Natural Gas, HFO	NA	2.81476e+06	2.25181e+06	0.5407	35.7835	https://www.gem.wiki/Relizane_power_plant
1097	ALGERIA	RHOURDE NOUSS	31.5	3888	122472	NG	Brayton	Gas Turbine	No cooling	NA	Natural Gas	NA	197033	157626	6.71422	29.695	Power plant inside the compression and injection field
1098	ALGERIA	SAIDA PLANT	30	1389.2	41676	Sun	PV	Land	No cooling	NA	Flat	BSk - Arid Steppe - Cold	4101.78	2871.25	0.805057	34.5321	Desert
1099	ALGERIA	SKIKDA AEC	490	3888	1905120	NG	Brayton	Gas Turbine	No cooling	NA	Natural Gas, HFO	NA	3.06496e+06	2.45197e+06	6.9364	36.879	This is an IGCC that produces 490 MW through brayton cycle (3068) and 390 (3067) through Rankine Cycle. Total 880 MW. Coast. https://www.power-technology.com/projects/skikda/?cf-view https://www.gem.wiki/Skikda_Combined-Cycle_power_plant
1100	ALGERIA	SKIKDA AEC	390	3809.4	1485666	waste heat	Rankine	Steam Turbine	Once through	Saline	Heat recovery	NA	56238.6	39367	6.9364	36.879	This is an IGCC that produces 490 MW through brayton cycle (3068) and 390 (3067) through Rankine Cycle. Total 880 MW. Coast. https://www.power-technology.com/projects/skikda/?cf-view
1101	ALGERIA	SKIKDA HELIUM PLANT	0.35	1241.5	434.525	Oil	ICE	Diesel-Engines	Dry cooling	Air	Diesel	NA	140.786	98.5502	6.95181	36.8815	By its size an location I assume ti is a diesel generator in the Helium Plant (Helison)
1102	ALGERIA	SKIKDA LNG PLANT	83.7	3888	325426	NG	Brayton	Gas Turbine	No cooling	NA	Natural Gas	NA	523545	418836	6.94763	36.8752	Five small units installed in the LNG Sonatracht gas plant
1103	ALGERIA	SKIKDA SONELGAZ	262	3888	1018656	NG	Rankine	Steam Turbine	Once through	Saline	Natural Gas, HFO	NA	38560.3	25670.1	6.93487	36.8799	coast. https://www.gem.wiki/Skikda_Steam_Gas_power_plant
1104	ALGERIA	SOUK AHRAS	90	1389.2	125028	Sun	PV	Land	No cooling	NA	Flat	BSk - Arid Steppe - Cold	12305.3	8613.74	7.8711	35.9194	Desert. Alias Oued El Kebrit
1105	ALGERIA	SOUK EL DJEMAA	8.085	316.344	2557.64	Hydropower	ROR	NA	NA	NA	NA	NA	0	0	0.877778	35.9986	reservoir
1106	ALGERIA	TABELBALA	7.096	1389.2	9857.76	Sun	PV	Land	No cooling	NA	Flat	BWh - Desert Hot	970.208	679.146	-3.25574	29.4055	Cannot find it. By the size and place I assume Land and Desert
1107	ALGERIA	TALMINE	6.8	1241.5	8442.2	Oil	ICE	Diesel-Engines	Dry cooling	Air	Diesel	NA	2735.27	1914.69	-0.497462	29.3291	By its size an location I assume ti is a diesel generator for the small village
1108	ALGERIA	TAMANRASSET	30	3888	116640	NG	Brayton	Gas Turbine	No cooling	NA	Natural Gas	NA	187650	150120	5.51353	22.7818	No clear satellite images here, but I can identify mobile units of gas turbines and combustion engines
1109	ALGERIA	TAMANRASSET	15.6	1241.5	19367.4	Oil	ICE	Diesel-Engines	Dry cooling	Air	Diesel	NA	6275.03	4392.52	5.51353	22.7818	No clear satellite images here, but I can identify mobile units of gas turbines and combustion engines
1110	ALGERIA	TAMANRASSET	9	1389.2	12502.8	Sun	PV	Land	No cooling	NA	Flat	BWh - Desert Hot	1230.53	861.374	5.45087	22.8487	Desert
1111	ALGERIA	TERGA (Oran Laminoir)	1200	3888	4665600	NG	Combined	Combined Cycle (CC)	Once through	Saline	Natural Gas, HFO	NA	176612	123629	-1.22806	35.4609	Three combined cycle units with once through. https://www.gem.wiki/Terga_power_plant
1112	ALGERIA	THERMIQUES A VAPEUR NAAMAA, TOUIFZ	1163	3888	4521744	NG	Combined	Combined Cycle (CC)	Dry cooling	Air	Natural Gas, HFO	NA	171167	119817	-0.341891	33.4746	Dry cooling tower. https://www.sonelgaz.dz/fr/2034/le-ministre-de-lenergie-en-visite-dans-les-wilayas-de-naama-et-del-bayadh https://www.gem.wiki/Naama_power_station
1113	ALGERIA	TIARET	420	3888	1632960	NG	Brayton	Gas Turbine	No cooling	NA	Natural Gas	NA	2.62711e+06	2.10168e+06	1.3562	35.3333	In the picture there are two units. Probably combined cycle https://www.gem.wiki/Tiaret_power_plant
1114	ALGERIA	TILGHEMT (Hassi R'Mel Gas I)	200	3888	777600	NG	Brayton	Gas Turbine	No cooling	NA	Natural Gas	NA	1.251e+06	1.0008e+06	3.35	33.15	It has dry cooling for possible some MCI inside https://www.gem.wiki/Tilghemt_I_power_plant
1115	ALGERIA	TILGHEMT II (HASSI R'MEL NORD)	368	3888	1430784	NG	Brayton	Gas Turbine	No cooling	NA	Natural Gas, HFO	NA	2.30185e+06	1.84148e+06	3.36587	33.141	https://www.gem.wiki/Tilghemt_II_power_plant
1116	ALGERIA	TILGHEMT III (HASSI R'MEL NORD SPE)	591	3888	2297808	NG	Brayton	Gas Turbine	No cooling	NA	Natural Gas	NA	3.69671e+06	2.95737e+06	3.36858	33.1366	https://www.gem.wiki/Tilghemt_III_power_plant
1117	ALGERIA	TILGHEMT ISCC (HASSI R'MEL ISCC)	84	1389.2	116693	Sun	CSP	PT	Dry cooling	Air	NA	BWh - Desert Hot	88346.1	61842.2	3.35625	33.1246	Combined cycle with solar. 84 MW with CSP (3299) and 66 MW with Rankine using HRSG (3300). Total 150 MW. https://www.gem.wiki/Hassi_R%27Mel_ISCC_power_station
1118	ALGERIA	TILGHEMT ISCC (HASSI R'MEL ISCC)	66	3809.4	251420	waste heat	Rankine	Steam Turbine	Dry cooling	Air	Heat recovery	NA	9517.3	6662.11	3.30298	32.9138	Combined cycle with solar. 84 MW with CSP (3299) and 66 MW with Rankine using HRSG (3300). Total 150 MW. https://www.gem.wiki/Hassi_R%27Mel_ISCC_power_station
1119	ALGERIA	TIMIMOUN	15.9	1241.5	19739.9	Oil	ICE	Diesel-Engines	Dry cooling	Air	Diesel	NA	6395.71	4476.99	0.25744	29.2464	Diesel engines
1120	ALGERIA	TIMIMOUN SKTM	10	1389.2	13892	Sun	PV	Land	No cooling	NA	Flat	BWh - Desert Hot	1367.26	957.082	0.24665	29.1697	Desert.
1121	ALGERIA	TIN FOUYE	63.6	3888	247277	NG	Brayton	Gas Turbine	No cooling	NA	Natural Gas, HFO	NA	397819	318255	7.52325	28.4384	Three units of gas turbines. Considering it is a NG and Oil field, Likely NG and HFO
1122	ALGERIA	TINDOUF	40.2	1241.5	49908.3	Oil	ICE	Diesel-Engines	Dry cooling	Air	HFO	NA	16170.3	11319.2	-8.15381	27.7483	Diesel engines
1123	ALGERIA	TINDOUF SITE	25.208	1389.2	35019	Sun	PV	Land	No cooling	NA	Flat	BWh - Desert Hot	3446.59	2412.61	-8.15431	27.752	Desert
1124	ALGERIA	TINDOUF SOLAR	94.25	1389.2	130932	Sun	PV	land	No cooling	NA	Flat	BWh - Desert Hot	12886.4	9020.5	-8.15477	27.7519	Desert
1125	ALGERIA	TINELKOUM	0.9	1241.5	1117.35	Oil	ICE	Diesel-Engines	Dry cooling	Air	Diesel	NA	362.021	253.415	10.2152	24.592	Marked as solar, but in reality MCI
1126	ALGERIA	TINZAOUATINE	2.5	1241.5	3103.75	Oil	ICE	Diesel-Engines	Dry cooling	Air	Diesel	NA	1005.61	703.93	3.41955	20.6785	Marked as solar, but in reality MCI
1127	ALGERIA	TOUGGOURT	7	3888	27216	NG	ICE	Gas-Engines	Dry cooling	Air	Natural Gas	NA	8817.98	6172.58	6.06667	33.1	Cannot find it. By the size and place I assume it is combustion engines
1128	ALGERIA	TSABIT	9	1389.2	12502.8	Sun	PV	Land	No cooling	NA	Flat	BWh - Desert Hot	1230.53	861.374	-0.218604	28.3504	Cannot find it. By the size and place I assume Land and Desert
1129	ALGERIA	ZAOUIET KOUNTA	6	1389.2	8335.2	Sun	PV	Land	No cooling	NA	Flat	BWh - Desert Hot	820.356	574.249	-0.173774	27.2407	Desert.
1130	ALGERIA	ZEBA'IR	2	316.344	632.689	Hydropower	Dammed	NA	NA	NA	NA	NA	3.87827e+06	3.87827e+06	-1.5068	34.7123	Reservoir
2001	ANGOLA	APR MORRO BENTO	40	4220	168800	Oil	ICE	Diesel-Engines	Dry cooling	Air	Diesel	NA	54691.2	38283.8	13.196	-8.90099	Because they are movable engines, probably have been moved to other places. However, we assume that they were operational in 2020. https://www.aprenergy.com/case-study/angola/
2002	ANGOLA	APR ROCHA PINTO	40	4220	168800	Oil	Brayton	Gas Turbine	No cooling	NA	Diesel	NA	271565	217252	13.2144	-8.85884	Because they are movable engines, probably have been moved to other places. However, we assume that they were operational in 2020. https://www.aprenergy.com/case-study/angola/
2003	ANGOLA	BARCAZA LUANDA-1	96	4220	405120	NG	Brayton	Gas Turbine	No cooling	NA	Natural Gas	NA	651757	521406	13.2792	-8.78483	coast, https://www.soapro.ao/pt/portfolio/barcaca-central-de-producao-e-fornecimento-de-energia-electrica-no-porto-pesqueiro-de-luanda/ https://angolapowerservices.blogspot.com/2013/04/central-electrica-flutuante-um-projecto.html
2004	ANGOLA	BARRA DANDE STEEL	20	4220	84400	Oil	ICE	Diesel-Engines	Dry cooling	Air	Diesel	NA	27345.6	19141.9	13.4053	-8.5824	Group of generators for the Steel factory. https://www.gem.wiki/Aceria_Angola_Bengo_steel_plant
2005	ANGOLA	BENFICA HUAMBO (central termica benfica Prodel)	22.12	4220	93346.4	Oil	ICE	Diesel-Engines	Dry cooling	Air	Diesel	NA	30244.2	21170.9	15.75	-12.76	Diesel engines
2006	ANGOLA	BENFICA LUANDA	42.3	4220	178506	Oil	ICE	Diesel-Engines	Dry cooling	Air	Diesel	NA	57835.9	40485.1	13.1651	-8.95411	Medium size power plant with combustion engines. Likely using diesel
2007	ANGOLA	BENGUELA	4.4	4220	18568	Oil	ICE	Diesel-Engines	Dry cooling	Air	Diesel	NA	6016.03	4211.22	13.4105	-12.5667	I cannot find it. Probably a group of diesel engines for the Benguela city
2008	ANGOLA	BIOPIO	15.2	3564.45	54179.7	Hydropower	ROR	NA	NA	NA	NA	NA	85777.7	85777.7	13.7319	-12.4706	2,2 hm³ reservoir capacity, http://www.inrh.gv.ao/portal/snirha
2009	ANGOLA	BIOPIO	22.8	4220	96216	Oil	ICE	Diesel-Engines	Dry cooling	Air	Diesel	NA	31174	21821.8	13.7319	-12.4706	I cannot find it, likely a group of diesel engines for the village
2010	ANGOLA	CAALA	0.4	4220	1688	Oil	ICE	Diesel-Engines	Dry cooling	Air	Diesel	NA	546.912	382.838	15.5606	-12.8525	By the size and fuel, it must be a small MCI generator
2011	ANGOLA	CACONGO	0.3	4220	1266	Oil	ICE	Diesel-Engines	Dry cooling	Air	Diesel	NA	410.184	287.129	12.1333	-5.23333	By the size and fuel, it must be a small MCI generator
2012	ANGOLA	CAMBAMBE-1	260	3710.94	964843	Hydropower	Dammed	NA	NA	NA	NA	NA	1.27541e+06	1.27541e+06	14.4809	-9.75233	Reservoir
2013	ANGOLA	CAMBAMBE-2	700	927.7	649390	Hydropower	Dammed	NA	NA	NA	NA	NA	0	0	14.4808	-9.75245	Worldbank invested to increase from 175 to to 700 MW, opening in 2017
2014	ANGOLA	CAMBULO	2.5	4220	10550	Oil	ICE	Diesel-Engines	Dry cooling	Air	Diesel	NA	3418.2	2392.74	21.2513	-7.73921	By its size and fuel I assume it is an ICE with diesel
2015	ANGOLA	CAMINHOS DE FERRO	112.5	4220	474750	Oil	Brayton	Gas Turbine	No cooling	NA	Diesel	NA	763778	611022	13.2769	-8.82815	Small movable units around the train station. https://www.power-technology.com/marketdata/power-plant-profile-caminhos-de-ferro-de-luanda-cfl-power-plant-angola/?cf-view
2016	ANGOLA	CAPANDA	520	3710.94	1.92969e+06	Hydropower	Dammed	NA	NA	NA	NA	NA	1.5134e+08	1.5134e+08	15.4672	-9.79547	Reservoir
2017	ANGOLA	CAPENDA-CAMULEMBA	0.425	4220	1793.5	Oil	ICE	Diesel-Engines	Dry cooling	Air	Diesel	NA	581.094	406.765	18.435	-9.41761	By the size and fuel, it must be a small MCI generator
2018	ANGOLA	CAUNGULA	0.62	4220	2616.4	Oil	ICE	Diesel-Engines	Dry cooling	Air	Diesel	NA	847.713	593.399	16.3667	-5.96667	By the size and fuel, it must be a small MCI generator
2019	ANGOLA	CAVACO	21.15	4220	89253	Oil	ICE	Diesel-Engines	Dry cooling	Air	Diesel	NA	28917.9	20242.6	13.4325	-12.5866	coast. But for size and fuel, assume that this is MCI
2020	ANGOLA	CAXITO	1.2	4220	5064	Oil	ICE	Diesel-Engines	Dry cooling	Air	Diesel	NA	1640.73	1148.51	13.6642	-8.57847	By the size and fuel, it must be a small MCI generator
2021	ANGOLA	CAZENGA	102.2	4220	431284	Oil	Brayton	Gas Turbine	No cooling	NA	Diesel	NA	693850	555080	13.3078	-8.81452	It says that the power plant is a combined cycle, but I can only see different types of gas turbines https://www.gem.wiki/Cazenga_power_station
2022	ANGOLA	CENTRAL TERMICA DO CHIBODO	30	4220	126600	Oil	ICE	Diesel-Engines	Dry cooling	Air	HFO	NA	41018.4	28712.9	12.2816	-5.55032	I can see in the satellite images that since the end of 2022, the substacao has included two gas turbines running on diesel. https://winenergysa.com/index.php?option=com_k2&view=item&id=226:central-el%C3%A9trica-do-lubango-hu%C3%ADla-em-angola&Itemid=225&lang=en
2023	ANGOLA	CHICAPA-I	16	3710.94	59375	Hydropower	ROR	NA	NA	NA	NA	NA	204303	204303	20.4917	-8.8167	ROR
2024	ANGOLA	CHINDONGA CEMENT PLANT (Kwanza Sul)	36	4220	151920	Oil	ICE	Diesel-Engines	Dry cooling	Air	HFO	NA	49222	34455.4	14.0309	-11.1849	coast, diesel engines built by Wärtsila. https://www.wartsila.com/media/news/04-08-2008-wartsila-receives-its-first-power-plant-order-from-angola-delivers-36-mw-unit-for-cement-works
2025	ANGOLA	CHITATO TERMICA	4.17	4220	17597.4	Oil	ICE	Diesel-Engines	Dry cooling	Air	Diesel	NA	5701.55	3991.09	20.5215	-7.46007	I cannot find it, probably has been moved already to other places. Likely a group of diesel generators.
2026	ANGOLA	CUANDO-I	1.25	3710.94	4638.67	Hydropower	ROR	NA	NA	NA	NA	NA	1639.15	1639.15	15.7392	-12.7761	ROR
2027	ANGOLA	CUANDO-II	2.2	3710.94	8164.06	Hydropower	ROR	NA	NA	NA	NA	NA	123389	123389	15.7392	-12.7761	ROR
2028	ANGOLA	CUANGO	5.45	4220	22999	Oil	ICE	Diesel-Engines	Dry cooling	Air	Diesel	NA	7451.67	5216.17	18.0438	-9.1425	Cannot find it, but likely a group of diesel generators for the village
2029	ANGOLA	CUBAL CHIMBASSI	0.032	3710.94	118.75	Hydropower	ROR	NA	NA	NA	NA	NA	0	0	14.25	-13.0333	Considering the size and that are nowhere to be found, are assumed to be inconduit without evaporation
2030	ANGOLA	CUCHI MISSION	1.2	46.4	55.68	Hydropower	ROR	NA	NA	NA	NA	NA	12808.2	12808.2	16.8942	-14.6536	ROR, https://www.hydroreview.com/world-regions/africa/angola-seeks-power-plan-two-small-hydro-pre-feasibility-studies/#gref
2031	ANGOLA	CUEMBA	0.1	4220	422	Oil	ICE	Diesel-Engines	Dry cooling	Air	Diesel	NA	136.728	95.7095	18.0833	-12.15	By the size and fuel, it must be a small MCI generator
2032	ANGOLA	CUILO	0.2	4220	844	Oil	ICE	Diesel-Engines	Dry cooling	Air	Diesel	NA	273.456	191.419	16.3667	-5.96667	By the size and fuel, it must be a small MCI generator
2033	ANGOLA	CUITO CUANAVALE	7.5	4220	31650	Oil	ICE	Diesel-Engines	Dry cooling	Air	Diesel	NA	10254.6	7178.21	19.1463	-15.141	Five diesel engines working on this power plant
2034	ANGOLA	DUNDO	33.84	4220	142805	Oil	ICE	Diesel-Engines	Dry cooling	Air	Diesel	NA	46268.7	32388.1	20.8059	-7.38212	Near river, no cooling tower
2035	ANGOLA	ESTACAO DO GANDA	0.039	3710.94	144.726	Hydropower	ROR	NA	NA	NA	NA	NA	0	0	14.6329	-13.0245	Considering the size and that are nowhere to be found, are assumed to be inconduit without evaporation
2036	ANGOLA	FAZENDA DA BONGA	0.122	3710.94	452.734	Hydropower	ROR	NA	NA	NA	NA	NA	0	0	15.6333	-12.2667	ROR
2037	ANGOLA	FAZENDA MATO GROSSO	1.611	3710.94	5978.32	Hydropower	ROR	NA	NA	NA	NA	NA	73224.1	73224.1	15.85	-9.43333	ROR
2038	ANGOLA	FUTILA (Malembo)	70	4220	295400	NG	Brayton	Gas Turbine	No cooling	NA	Natural Gas	NA	475240	380192	12.2101	-5.36838	The power plant has included a couple of turbines since 2020. https://www.gem.wiki/F%C3%BAtila_power_station
2039	ANGOLA	GABELA	0.6	4220	2532	Oil	ICE	Diesel-Engines	Dry cooling	Air	Diesel	NA	820.367	574.257	14.3799	-10.8515	By the size and fuel, it must be a small MCI generator
2040	ANGOLA	GANGELAS DAM	1.2	3710.94	4453.12	Hydropower	Dammed	NA	NA	NA	NA	NA	5.08487e+06	5.08487e+06	13.7	-15.1833	Reservoir
2041	ANGOLA	KUITO	13.48	4220	56885.6	Oil	ICE	Diesel-Engines	Dry cooling	Air	Diesel	NA	18430.9	12901.6	16.8987	-12.4437	Power plant near the subestation. ICE
2042	ANGOLA	LAUCA	2070	3710.94	7.68164e+06	Hydropower	Dammed	NA	NA	NA	NA	NA	1.69057e+08	1.69057e+08	14.9134	-9.30059	operational in 2017
2043	ANGOLA	LOBITO	26	4220	109720	Oil	ICE	Diesel-Engines	Dry cooling	Air	Diesel	NA	35549.3	24884.5	13.5897	-12.3817	Next to the Quileva power plant, until 2022 it was a parking place with several movable diesel engines. Now it has been decommissioned.
2044	ANGOLA	LOBITO AURORA	0.09	3710.94	333.984	Hydropower	ROR	NA	NA	NA	NA	NA	0	0	13.5456	-12.3481	ROR
2045	ANGOLA	LOBITO ISABEL	0.032	3710.94	118.75	Hydropower	ROR	NA	NA	NA	NA	NA	0	0	13.5456	-12.3481	Considering the size and that are nowhere to be found, are assumed to be inconduit without evaporation
2046	ANGOLA	LOMAUM	140	1722.9	241206	Hydropower	Dammed	NA	NA	NA	NA	NA	348136	348136	14.3833	-12.7167	From 65 to 140 MW. https://fr.allafrica.com/stories/201602051613.html
2047	ANGOLA	LOSSAMBO	8	4220	33760	Oil	ICE	Diesel-Engines	Dry cooling	Air	Diesel	NA	10938.2	7656.76	15.7673	-12.8497	Power plant of diesel engines since 2016
2048	ANGOLA	LUANDA EMERGENCY	40.8	4220	172176	Oil	ICE	Diesel-Engines	Dry cooling	Air	Diesel	NA	55785	39049.5	13.2344	-8.83833	probably part of a backup diesel plant for the largest hospital
2049	ANGOLA	LUANDA REFINERY	18.5	4220	78070	Oil	ICE	Diesel-Engines	Dry cooling	Air	Diesel	NA	25294.7	17706.3	13.3006	-8.78205	A group of diesel engines for the refinery
2050	ANGOLA	LUBALO	0.52	4220	2194.4	Oil	ICE	Diesel-Engines	Dry cooling	Air	Diesel	NA	710.985	497.69	19.3783	-9.18208	By the size and fuel, it must be a small MCI generator
2051	ANGOLA	LUBANGO	46.53	4220	196357	Oil	ICE	Diesel-Engines	Dry cooling	Air	Diesel	NA	63619.5	44533.6	13.5321	-14.9186	Power plant near the subestation. ICE
2052	ANGOLA	LUCAPA	2.7	4220	11394	Oil	ICE	Diesel-Engines	Dry cooling	Air	Diesel	NA	3691.65	2584.16	20.737	-8.4253	I cannot find it. Probably a group of diesel engines for the Lucapa City
2053	ANGOLA	LUENA MOXICO	20	4220	84400	Oil	ICE	Diesel-Engines	Dry cooling	Air	Diesel	NA	27345.6	19141.9	19.9167	-11.7833	Power plant expanded with more diesel generators because of water lack of the hydro plant nearby. https://www-jornaldeangola-ao.translate.goog/ao/noticias/novas-centrais-termicas-sao-instaladas-no-moxico/?_x_tr_sl=pt&_x_tr_tl=nl&_x_tr_hl=nl&_x_tr_pto=sc
2054	ANGOLA	LUQUIXE	1.12	3710.94	4156.25	Hydropower	ROR	NA	NA	NA	NA	NA	12941.8	12941.8	15	-7.75	ROR
2055	ANGOLA	LUXILO	1.5	4220	6330	Oil	ICE	Diesel-Engines	Dry cooling	Air	Diesel	NA	2050.92	1435.64	21.35	-7.58301	By the size and fuel, it must be a small MCI generator
2056	ANGOLA	MABUBAS	26.8	3710.94	99453.1	Hydropower	Dammed	NA	NA	NA	NA	NA	1.55859e+06	1.55859e+06	13.6964	-8.53167	Reservoir
2057	ANGOLA	MALANJE	2.44	4220	10296.8	Oil	ICE	Diesel-Engines	Dry cooling	Air	Diesel	NA	3336.16	2335.31	16.341	-9.54015	By its size and fuel I assume it is an ICE with diesel
2058	ANGOLA	MALONGO WAKESHA	10	4220	42200	NG	ICE	Gas-Engines	Dry cooling	Air	Natural Gas	NA	13672.8	9570.95	12.2051	-5.39304	Group of engines burning natural gas from the malongo refinery and port
2059	ANGOLA	MALONGO WAKESHA	17	4220	71740	Oil	ICE	Diesel-Engines	Dry cooling	Air	Diesel	NA	23243.7	16270.6	12.2087	-5.39097	Diesel generators for the refinery.
2060	ANGOLA	MATALA	41.4	3710.94	153633	Hydropower	Dammed	NA	NA	NA	NA	NA	1.98917e+07	1.98917e+07	15.0333	-14.7333	Reservoir
2061	ANGOLA	MATOS VAZ	0.098	3710.94	363.672	Hydropower	ROR	NA	NA	NA	NA	NA	0	0	15.2167	-8.46667	ROR
2062	ANGOLA	NAMIBE	40	4220	168800	NG	ICE	Gas-Engines	Dry cooling	Air	Natural Gas	NA	54691.2	38283.8	12.1241	-15.2391	Power plant that gives electricity to the airport https://angolaenergia2025.gestoenergy.com/en/conteudo/generation-0
2063	ANGOLA	NDALATANDO	0.7	4220	2954	Oil	ICE	Diesel-Engines	Dry cooling	Air	Diesel	NA	957.095	669.967	14.9116	-9.29781	By the size and fuel, it must be a small MCI generator
2064	ANGOLA	NGOVE DAM	61.8	3710.94	229336	Hydropower	Dammed	NA	NA	NA	NA	NA	2.29481e+06	2.29481e+06	15.5606	-12.8525	Reservoir
2065	ANGOLA	NOVA LISBOA MARSCHALL	0.034	3564.5	121.193	Hydropower	ROR	NA	NA	NA	NA	NA	0	0	15.7392	-12.7761	Considering the size and that are nowhere to be found, are assumed to be inconduit without evaporation
2066	ANGOLA	ONDJIVA	11.28	4220	47601.6	Oil	ICE	Diesel-Engines	Dry cooling	Air	Diesel	NA	15422.9	10796	15.7407	-17.0895	Power plant with diesel engines. It is also visible two gas turbines, probably running on diesel too.
2067	ANGOLA	PESKWANZA	4.5	4220	18990	Oil	ICE	Diesel-Engines	Dry cooling	Air	Diesel	NA	6152.76	4306.93	13.7599	-10.7314	I cannot find it. Probably a group of diesel engines for the Peskwanza port
2068	ANGOLA	PORTO AMBOIM	3	4220	12660	Oil	ICE	Diesel-Engines	Dry cooling	Air	Diesel	NA	4101.84	2871.29	13.7599	-10.7314	Group of diesel engines to provide electricity for port
2069	ANGOLA	PRAIA DO BISPO	24	4220	101280	Oil	ICE	Diesel-Engines	Dry cooling	Air	Diesel	NA	32814.7	22970.3	13.2208	-8.8191	I cannot find it, probably a group of diesel engines
2070	ANGOLA	QUARTEIS	45.84	4220	193445	Oil	ICE	Diesel-Engines	Dry cooling	Air	Diesel	NA	62676.1	43873.2	13.2408	-8.84038	Diesel engines with two sets of racks of fans.
2071	ANGOLA	QUILENGUES	0.05	4220	211	Oil	ICE	Diesel-Engines	Dry cooling	Air	Diesel	NA	68.3639	47.8548	14.0833	-14.0667	By the size and fuel, it must be a small MCI generator
2072	ANGOLA	QUILENGUES MOURA	0.117	3710.94	434.179	Hydropower	ROR	NA	NA	NA	NA	NA	0	0	14.0833	-14.0667	ROR
2073	ANGOLA	QUILEVA	90	4220	379800	Oil	Brayton	Gas Turbine	No cooling	NA	Diesel	NA	611022	488818	13.5897	-12.3817	One large gas turbine, and six movable gas turbines next to it.
2074	ANGOLA	RUACANA	347	3710.94	1.28769e+06	Hydropower	Dammed	NA	NA	NA	NA	NA	4.14991e+06	4.14991e+06	14.2167	-17.3833	Reservoir
2075	ANGOLA	SOYO CITY	720	4220	3038400	NG	Combined	Combined Cycle (CC)	Wet Tower	Freshwater	Natural Gas, Diesel	BSh - Arid Steppe - Hot	8.74121e+06	3.10543e+06	12.3255	-6.18182	New combined cycle power plant erected since 2017. Likely before it was only a diesel fueled power plant with engines. https://www.gem.wiki/Soyo_power_station
2076	ANGOLA	SUMBE	3	4220	12660	Oil	ICE	Diesel-Engines	Dry cooling	Air	Diesel	NA	4101.84	2871.29	13.8437	-11.206	I cannot find it. Probably a group of diesel engines for the Sumbe City
2077	ANGOLA	TCHICUMINA (SAURIMO)	32.1	4220	135462	Oil	ICE	Diesel-Engines	Dry cooling	Air	Diesel	NA	43889.7	30722.8	20.4022	-9.64146	Near river, no cooling tower. Building with diesel engines and movable diesel engines
2078	ANGOLA	TCHIHUMBWE	12.4	3710.94	46015.6	Hydropower	ROR	NA	NA	NA	NA	NA	0	0	20.2013	-11.0303	ready 28 months after August 2013. http://www.toyconstructions.com/angola-energy-minister-lays-cornerstone-for-construction-of-tchihumbwe-dam/
2079	ANGOLA	TERMICA DO XITOTO	11.2	4220	47264	Oil	ICE	Diesel-Engines	Dry cooling	Air	Diesel	NA	15313.5	10719.5	12.1707	-15.1454	Power plant near the plants of Saldosol. Before 2016 there were only diesel engines. Since then, two gas turbines have been included
2080	ANGOLA	TERMICA DO XITOTO GT	56	4220	236320	Oil	Brayton	Gas Turbine	No cooling	NA	Diesel	NA	380192	304153	12.1707	-15.1454	Power plant near the plants of Saldosol. Before 2016 there were only diesel engines. Since then, two gas turbines have been included. https://openinframap.org/stats/area/Angola/plants/849588053
2081	ANGOLA	TOMBWA	2.96	4220	12491.2	Oil	ICE	Diesel-Engines	Dry cooling	Air	Diesel	NA	4047.15	2833	11.85	-15.8	Group of three diesel generatiors. Since 2022 it has been upgraded with more engines and one gas turbine
2082	ANGOLA	UIGE	2.36	4220	9959.2	Oil	ICE	Diesel-Engines	Dry cooling	Air	Diesel	NA	3226.78	2258.74	15.0613	-7.60874	By its size and fuel I assume it is an ICE with diesel
2083	ANGOLA	VILA NOVA AHLEFELD	0.028	3710.94	103.906	Hydropower	ROR	NA	NA	NA	NA	NA	0	0	16.2333	-12.5667	Considering the size and that are nowhere to be found, are assumed to be inconduit without evaporation
2084	ANGOLA	XA-MUTEBA	0.54	4220	2278.8	Oil	ICE	Diesel-Engines	Dry cooling	Air	Diesel	NA	738.331	516.831	17.8125	-9.51458	By the size and fuel, it must be a small MCI generator
3001	ASCENSION ISLAND	ROOF POWER STATIONS (4)	50	1000	50000	sun	PV	Rooftop	No cooling	NA	Flat	BWh - Desert Hot	700.301	490.211	-14.4091	-7.95047	Not easily identifiable
3002	ASCENSION ISLAND	ASCENSION BBC	1.65	23	37.95	Wind	Wind turbine	Onshore	No cooling	NA	NA	NA	5.02797e-06	5.02797e-06	-14.3833	-7.9	total generation MW
3003	ASCENSION ISLAND	ASCENSION WIND	2.7	23	62.1	Wind	Wind turbine	Onshore	No cooling	NA	NA	NA	8.22759e-06	8.22759e-06	-14.3667	-7.95	Wind Farm
3004	ASCENSION ISLAND	ATLANTIC RELAY STATION	9.73	41	398.93	Oil	ICE	Diesel-Engines	Dry cooling	Air	Diesel	NA	129.253	90.4773	-14.3772	-7.89812	No infrastructure that tells us other types. Likely a group of diesel generators for the BBC Relay Station
3005	ASCENSION ISLAND	WIDEAWAKE AIRFIELD	7.38	41	302.58	Oil	ICE	Diesel-Engines	Dry cooling	Air	Diesel	NA	98.0358	68.6251	-14.4069	-7.9683	No infrastructure that tells us other types. Likely a group of diesel generators for the Airport
4001	BENIN	AKPAKPA	48.5	2857	138564	Oil	ICE	Diesel-Engines	Dry cooling	Air	Diesel	NA	44894.9	31426.4	2.43333	6.35	http://www.ecowrex.org/eg/akpakpa-1
4002	BENIN	CANA FACTORY	1	2857	2857	Oil	ICE	Diesel-Engines	Dry cooling	Air	Diesel	NA	925.667	647.967	2.0831	7.1461	By the size and fuel, it must be a small MCI generator
4003	BENIN	COTONOU BREWERY	1	2857	2857	Oil	ICE	Diesel-Engines	Dry cooling	Air	Diesel	NA	925.667	647.967	2.43333	6.35	By the size and fuel, it must be a small MCI generator
4004	BENIN	COTONOU LCB	2.8	2857	7999.6	Oil	ICE	Diesel-Engines	Dry cooling	Air	Diesel	NA	2591.87	1814.31	2.41833	6.36536	By the size and fuel, it must be a diesel engine for the headquarters of this industry
4005	BENIN	COTONOU VEDOKO	20	2857	57140	Oil	ICE	Diesel-Engines	Dry cooling	Air	Diesel	NA	18513.3	12959.3	2.3869	6.37784	Electrical centre of the city. The infrastructure does not show other types. Likely a group of diesel engines
4006	BENIN	DJOUGOU	5	1417	7085	sun	PV	Land	No cooling	NA	Flat	Aw - Tropical Savannah	697.311	488.117	1.62019	9.66697	Forest. http://www.ecowrex.org/resources/energy_generators http://www.ecowrex.org/eg/djougou
4007	BENIN	GBEGAMEY	30	2857	85710	Oil	ICE	Diesel-Engines	Dry cooling	Air	Diesel	NA	27770	19439	2.41812	6.36204	coast, operational http://www.ecowrex.org/eg/gbegamey
4008	BENIN	HOTEL SHERATON COTONU	1.6	2857	4571.2	Oil	ICE	Diesel-Engines	Dry cooling	Air	Diesel	NA	1481.07	1036.75	2.41833	6.36536	By its size an location I assume ti is a diesel generator used as backup for the Hotel
4009	BENIN	LCCI BENIN	1	2857	2857	Oil	ICE	Diesel-Engines	Dry cooling	Air	Diesel	NA	925.667	647.967	2.44064	6.3807	This is Lagos Chamber of Commerce and Industry. Assumed Diesel generator due to its size and fuel.
4010	BENIN	MARIA-GLETA TERMINAL	139.07	617.66	85898	NG	ICE	Gas-Engines	Dry cooling	Air	Natural Gas, HFO	NA	27830.9	19481.6	2.30659	6.42628	coast, Allington, Lucy & Cannone, Carla & Pappis, Ioannis & Halloran, Claire & Hirmer, Stephanie & Cervantes Barron, Karla & Usher, Will & Pye, Steve & Brown, Edward & Howells, Mark & Taliotis, Constantinos & Sundin, Caroline & Sridha, Vignesh & Ramos, Eunice & Brinkerink, Maarten & Deane, Paul & Gritsevskyi, Andrii & Moura, Gustavo & Rouget, Arnaud & Rogner, Holger. (2021). Selected ‘Starter Kit…
4011	BENIN	NATININGOU (BERECINGOU)	10.08	2857	28798.6	Oil	ICE	Diesel-Engines	Dry cooling	Air	Diesel	NA	9330.73	6531.51	1.3984	10.2291	Group of diesel engines to provide electricity for the village
4012	BENIN	ONIGBOLO PLANT	2.214	2857	6325.4	Oil	ICE	Diesel-Engines	Dry cooling	Air	Diesel	NA	2049.43	1434.6	2.6517	7.18535	Diesel generator for the Cement plant
4013	BENIN	PARAKOU	17.52	2857	50054.6	Oil	ICE	Diesel-Engines	Dry cooling	Air	Diesel	NA	16217.7	11352.4	2.5917	9.33253	Substation. The infrastructure does not show other types. Likely a group of diesel engines
4014	BENIN	PARAKOU COTEB	1.46	2857	4171.22	Oil	ICE	Diesel-Engines	Dry cooling	Air	Diesel	NA	1351.47	946.032	2.63031	9.33716	By the size and fuel, it must be a small MCI generator
4015	BENIN	PORTO NOVO BENIN	10.08	2857	28798.6	Oil	ICE	Diesel-Engines	Dry cooling	Air	Diesel	NA	9330.73	6531.51	2.60359	6.49646	coast. But for size and fuel, assume that this is MCI
5001	BOTSWANA	FRANCISTOWN APR	105	29	3045	Oil	ICE	Diesel-Engines	Dry cooling	Air	Diesel	NA	986.579	690.605	27.5079	-21.17	Group of movable diesel engines. https://www.gem.wiki/Francistown_APR_power_station https://www.aprenergy.com/case-study/botswana/
5002	BOTSWANA	GHANZI	2.272	29	65.888	Oil	ICE	Diesel-Engines	Dry cooling	Air	Diesel	NA	21.3477	14.9434	21.7833	-21.5667	Likely a diesel generator for the farm house hotel
5003	BOTSWANA	GUMARE	1.706	29	49.474	Oil	ICE	Diesel-Engines	Dry cooling	Air	Diesel	NA	16.0296	11.2207	22.1518	-19.3706	By its size and fuel I assume it is an ICE with diesel
5004	BOTSWANA	KANG	2.11	29	61.19	Oil	ICE	Diesel-Engines	Dry cooling	Air	Diesel	NA	19.8255	13.8779	22.7876	-23.6752	By its size and fuel I assume it is an ICE with diesel
5005	BOTSWANA	MORUPULE-A	132	3564	470448	Coal	Rankine	Steam Turbine	Dry cooling	Air	Pulverized Coal - Subcritical	NA	76321.7	53425.2	27.0361	-22.5207	Air cooling. https://www.gem.wiki/Morupule_A_Power_Station
5006	BOTSWANA	MORUPULE-A	3.54	29	102.66	Oil	ICE	Diesel-Engines	Dry cooling	Air	Diesel	NA	33.2618	23.2833	27.0361	-22.5207	Likely a diesel generator for the Coal Morupule A plant
5007	BOTSWANA	MORUPULE-B + Phase II	600	3564	2138400	Coal	Rankine	Steam Turbine	Dry cooling	Air	Pulverized Coal - Subcritical	NA	346917	242842	27.1251	-22.546	Two small cooling towers, but majorly dry cooling. https://www.afdb.org/fileadmin/uploads/afdb/Documents/Project-and-Operations/Botswana_-_The_Morupule_B_Power_Project_-_Appraisal_Report.pdf https://www.gem.wiki/Morupule_B_power_station
5008	BOTSWANA	ORAPA SUBSTATION	90	29	2610	Oil	Brayton	Gas Turbine	No cooling	NA	Diesel	NA	4198.97	3359.17	25.417	-21.3181	Despite being oil, the images show two large gas turbines. Porbably using diesel
5009	BOTSWANA	PHAKALANE	1.3	1552	2017.6	Sun	PV	Land	No cooling	NA	Flat	BSh - Arid Steppe - Hot	198.574	139.002	25.9687	-24.5738	Forest.
5010	BOTSWANA	SUA PAN SODA ASH	20	3564	71280	Coal	Rankine	Steam Turbine	Once through	Saline	Coal - Circulating Fluidized bed	NA	11563.9	8094.72	26.0742	-20.5322	soda plant, slat lake nearby. https://botash.bw/wp-content/uploads/2022/12/IAR-2020.pdf
6001	BURKINA FASO	BAGASSI	0.18	2294	412.92	Oil	ICE	Diesel-Engines	Dry cooling	Air	Diesel	NA	133.786	93.6502	-3.2782	13.1577	By the size and fuel, it must be a small MCI generator
6002	BURKINA FASO	BAGRE	14	2664.3	37300.2	Hydropower	Dammed	NA	NA	NA	NA	NA	645836	645836	-0.546	11.475	reservoir, installed 16 MW: https://www.e3s-conferences.org/articles/e3sconf/pdf/2022/13/e3sconf_cigb2022_03028.pdf
6003	BURKINA FASO	BANFORA	0.8	2294	1835.2	Oil	ICE	Diesel-Engines	Dry cooling	Air	Diesel	NA	594.604	416.223	-4.76667	10.6333	By the size and fuel, it must be a small MCI generator
6004	BURKINA FASO	BATIE	0.12	2294	275.28	Oil	ICE	Diesel-Engines	Dry cooling	Air	Diesel	NA	89.1906	62.4335	-2.91667	9.88333	By the size and fuel, it must be a small MCI generator
6005	BURKINA FASO	BISSA GOLD MINE	15.36	2294	35235.8	Oil	ICE	Diesel-Engines	Dry cooling	Air	Diesel	NA	11416.4	7991.48	-1.51109	13.1513	Diesel engines for gold mine
6006	BURKINA FASO	BITTOU	0.604	2294	1385.58	Oil	ICE	Diesel-Engines	Dry cooling	Air	Diesel	NA	448.926	314.248	-0.302854	11.2518	By the size and fuel, it must be a small MCI generator
6007	BURKINA FASO	BOBO (SONABEL)	26.5	2294	60791	Oil	ICE	Diesel-Engines	Dry cooling	Air	Diesel	NA	19696.3	13787.4	-4.31653	11.15	Two buildings with diesel engines
6008	BURKINA FASO	BOGANDE	0.284	2294	651.496	Oil	ICE	Diesel-Engines	Dry cooling	Air	Diesel	NA	211.085	147.759	-0.143611	12.9714	By the size and fuel, it must be a small MCI generator
6009	BURKINA FASO	BOROMO	1.15	2294	2638.1	Oil	ICE	Diesel-Engines	Dry cooling	Air	Diesel	NA	854.744	598.321	-2.93333	11.75	By the size and fuel, it must be a small MCI generator
6010	BURKINA FASO	BOUENA	0.04	2294	91.76	Oil	ICE	Diesel-Engines	Dry cooling	Air	Diesel	NA	29.7302	20.8112	-3.3969	13.251	By the size and fuel, it must be a small MCI generator
6011	BURKINA FASO	BOULSA	0.455	2294	1043.77	Oil	ICE	Diesel-Engines	Dry cooling	Air	Diesel	NA	338.181	236.727	-0.575833	12.6675	By the size and fuel, it must be a small MCI generator
6012	BURKINA FASO	BOUNGOU GOLD MINE	8	2294	18352	Oil	ICE	Diesel-Engines	Dry cooling	Air	Diesel	NA	5946.04	4162.23	1.412	11.989	New gold mine, that started in 2019
6013	BURKINA FASO	DAGRIS	2.45	333	815.85	Biomass	Rankine	Steam Turbine	No cooling	NA	Cotton	NA	132.357	92.6498	-1.5399	12.3636	https://agritrop.cirad.fr/590467/3/ID590467.pdf. There is no wet tower
6014	BURKINA FASO	DEDOUGOU	4.325	2294	9921.55	Oil	ICE	Diesel-Engines	Dry cooling	Air	Diesel	NA	3214.58	2250.21	-3.47366	12.4664	Small power plant for the village. Diesel engines
6015	BURKINA FASO	DIAPAGA	0.565	2294	1296.11	Oil	ICE	Diesel-Engines	Dry cooling	Air	Diesel	NA	419.939	293.958	1.78889	12.0708	By the size and fuel, it must be a small MCI generator
6016	BURKINA FASO	DIEBOUGOU	1.23	2294	2821.62	Oil	ICE	Diesel-Engines	Dry cooling	Air	Diesel	NA	914.204	639.943	-3.25	10.9667	By the size and fuel, it must be a small MCI generator
6017	BURKINA FASO	DJIBO	0.604	2294	1385.58	Oil	ICE	Diesel-Engines	Dry cooling	Air	Diesel	NA	448.926	314.248	-1.63056	14.1022	By the size and fuel, it must be a small MCI generator
6018	BURKINA FASO	DORI	1.29	2294	2959.26	Oil	ICE	Diesel-Engines	Dry cooling	Air	Diesel	NA	958.799	671.16	-0.0345	14.0354	By the size and fuel, it must be a small MCI generator
6019	BURKINA FASO	Essakane gold mine	55	2294	126170	Oil	ICE	Diesel-Engines	Dry cooling	Air	Diesel	NA	40879	28615.3	0.0774677	14.3691	Diesel engines with dry cooling. Since march 2018 less production due to the instalation of 15 MWp of solar PV. https://www.wartsila.com/energy/learn-more/references/mining-cement/essakane-solar-sas-burkina-faso
6020	BURKINA FASO	Essakane gold mine	15	1241	18615	Sun	PV	Land	No cooling	NA	Flat	BSh - Arid Steppe - Hot	1832.1	1282.47	0.0777473	14.3649	Semi-Arid. https://www.iamgoldessakane.com/axe-4-protection-de-lenvironnement/
6021	BURKINA FASO	FADA-N'GOURMA	5.14	2294	11791.2	Oil	ICE	Diesel-Engines	Dry cooling	Air	Diesel	NA	3820.33	2674.23	0.355547	12.0525	Diesel engines with one rack of fans
6022	BURKINA FASO	GAOUA	2.04	2294	4679.76	Oil	ICE	Diesel-Engines	Dry cooling	Air	Diesel	NA	1516.24	1061.37	-3.25083	10.2992	By its size and fuel I assume it is an ICE with diesel
6023	BURKINA FASO	GAYERI	0.12	2294	275.28	Oil	ICE	Diesel-Engines	Dry cooling	Air	Diesel	NA	89.1906	62.4335	0.493056	12.6497	By the size and fuel, it must be a small MCI generator
6024	BURKINA FASO	GOROM-GOROM	0.344	2294	789.136	Oil	ICE	Diesel-Engines	Dry cooling	Air	Diesel	NA	255.68	178.976	-0.236111	14.4439	By the size and fuel, it must be a small MCI generator
6025	BURKINA FASO	GOURCY	0.36	2294	825.84	Oil	ICE	Diesel-Engines	Dry cooling	Air	Diesel	NA	267.572	187.3	-2.35	13.2167	By the size and fuel, it must be a small MCI generator
6026	BURKINA FASO	HOUNDE	0.56	2294	1284.64	Oil	ICE	Diesel-Engines	Dry cooling	Air	Diesel	NA	416.223	291.356	-3.51667	11.5	By the size and fuel, it must be a small MCI generator
6027	BURKINA FASO	KAYA	2.85	2294	6537.9	Oil	ICE	Diesel-Engines	Dry cooling	Air	Diesel	NA	2118.28	1482.79	-1.08444	13.0917	By its size and fuel I assume it is an ICE with diesel
6028	BURKINA FASO	KOMPIENGA	16	2062.5	33000	Hydropower	Dammed	NA	NA	NA	NA	NA	4.79771e+06	4.79771e+06	0.7	11.07	reservoir, installed 16 MW. Ref: Worldbank at https://www.afdb.org/en/documents/document/burkina-faso-kompienga-hydro-electrique-dam-project-9716
6029	BURKINA FASO	KOMSILGA (SONABEL)	91.5	2294	209901	Oil	ICE	Diesel-Engines	Dry cooling	Air	Diesel	NA	68007.9	47605.5	-1.48653	12.4338	Diesel engines with dry cooling
6030	BURKINA FASO	KONGOUSSI	0.8	2294	1835.2	Oil	ICE	Diesel-Engines	Dry cooling	Air	Diesel	NA	594.604	416.223	-1.53472	13.3258	By the size and fuel, it must be a small MCI generator
6031	BURKINA FASO	KOSSODO	75.13	2294	172348	Oil	ICE	Diesel-Engines	Dry cooling	Air	Diesel	NA	55840.8	39088.5	-1.48458	12.4339	Large diesel engines with one rack of dry cooling
6032	BURKINA FASO	KOUDOUGOU	24.74	2294	56753.6	Oil	ICE	Diesel-Engines	Dry cooling	Air	Diesel	NA	18388.1	12871.7	-2.36667	12.25	I cannot find it. Probably moved or decommission already. Nothing on location, also nothing in Koudougou Because its size and fuel, we assume a diesel engine
6033	BURKINA FASO	KOUPELA	0.415	2294	952.01	Oil	ICE	Diesel-Engines	Dry cooling	Air	Diesel	NA	308.451	215.916	-0.351667	12.1794	By the size and fuel, it must be a small MCI generator
6034	BURKINA FASO	LEO SISSILI	0.17	2294	389.98	Oil	ICE	Diesel-Engines	Dry cooling	Air	Diesel	NA	126.353	88.4474	-2.1	11.1	By the size and fuel, it must be a small MCI generator
6035	BURKINA FASO	MANA GOLD MINE (SEMAFO)	8	2294	18352	Oil	ICE	Diesel-Engines	Dry cooling	Air	Diesel	NA	5946.04	4162.23	-3.40874	11.9916	Diesel generators for the gold mine. Mana mine is now under SEMAFO
6036	BURKINA FASO	MANGA	0.359	2294	823.546	Oil	ICE	Diesel-Engines	Dry cooling	Air	Diesel	NA	266.829	186.78	-1.07306	11.6636	By the size and fuel, it must be a small MCI generator
6037	BURKINA FASO	MOGTEDO	0.07	2294	160.58	Oil	ICE	Diesel-Engines	Dry cooling	Air	Diesel	NA	52.0279	36.4195	-0.837222	12.2844	By the size and fuel, it must be a small MCI generator
6038	BURKINA FASO	NIOFILA	1.89	4359.4	8239.27	Hydropower	Dammed	NA	NA	NA	NA	NA	0	0	-5.09996	10.6671	reservoir
6039	BURKINA FASO	NOUNA	0.96	2294	2202.24	Oil	ICE	Diesel-Engines	Dry cooling	Air	Diesel	NA	713.525	499.468	-3.86667	12.7333	By the size and fuel, it must be a small MCI generator
6040	BURKINA FASO	ORODARA	0.16	2294	367.04	Oil	ICE	Diesel-Engines	Dry cooling	Air	Diesel	NA	118.921	83.2446	-4.93417	10.9492	By the size and fuel, it must be a small MCI generator
6041	BURKINA FASO	OUAGA	69.34	2294	159066	Oil	ICE	Diesel-Engines	Dry cooling	Air	Diesel	NA	51537.3	36076.1	-1.47749	12.4212	Diesel generators for the Brakina Ouaga plant (glass)
6042	BURKINA FASO	OUAHIGOUYA	5.1	2294	11699.4	Oil	ICE	Diesel-Engines	Dry cooling	Air	Diesel	NA	3790.6	2653.42	-2.392	13.5654	Small power plant for the village. Diesel engines
6043	BURKINA FASO	PO SONABEL	0.11	2294	252.34	Oil	ICE	Diesel-Engines	Dry cooling	Air	Diesel	NA	81.7581	57.2307	-1.145	11.1697	By the size and fuel, it must be a small MCI generator
6044	BURKINA FASO	SAPOUY	0.14	2294	321.16	Oil	ICE	Diesel-Engines	Dry cooling	Air	Diesel	NA	104.056	72.839	-1.77361	11.5544	By the size and fuel, it must be a small MCI generator
6045	BURKINA FASO	SEBBA	0.11	2294	252.34	Oil	ICE	Diesel-Engines	Dry cooling	Air	Diesel	NA	81.7581	57.2307	0.530443	13.4364	By the size and fuel, it must be a small MCI generator
6046	BURKINA FASO	SEYTENGA	0.04	2294	91.76	Oil	ICE	Diesel-Engines	Dry cooling	Air	Diesel	NA	29.7302	20.8112	0.309556	13.972	By the size and fuel, it must be a small MCI generator
6047	BURKINA FASO	SOLENZO	0.25	2294	573.5	Oil	ICE	Diesel-Engines	Dry cooling	Air	Diesel	NA	185.814	130.07	-4.08333	12.1833	By the size and fuel, it must be a small MCI generator
6048	BURKINA FASO	SOMITA-TAPARKO	18.04	2294	41383.8	Oil	ICE	Diesel-Engines	Dry cooling	Air	Diesel	NA	13408.3	9385.83	-0.350909	13.5253	Diesel engines for gold mine
6049	BURKINA FASO	TENKODOGO	0.435	2294	997.89	Oil	ICE	Diesel-Engines	Dry cooling	Air	Diesel	NA	323.316	226.321	-0.369722	11.78	By the size and fuel, it must be a small MCI generator
6050	BURKINA FASO	TOUGAN	1.3	2294	2982.2	Oil	ICE	Diesel-Engines	Dry cooling	Air	Diesel	NA	966.232	676.362	-3.06667	13.0667	By the size and fuel, it must be a small MCI generator
6051	BURKINA FASO	TOURNI	0.62	4359.4	2702.83	Hydropower	ROR	NA	NA	NA	NA	NA	0	0	-5.15056	10.7702	reservoir
6052	BURKINA FASO	YAKO	1.311	2294	3007.43	Oil	ICE	Diesel-Engines	Dry cooling	Air	Diesel	NA	974.408	682.085	-2.26667	12.9667	By the size and fuel, it must be a small MCI generator
6053	BURKINA FASO	ZAGTOULI SOLAR	33	1241	40953	Sun	PV	Land	No cooling	NA	Flat	BSh - Arid Steppe - Hot	4030.62	2821.44	-1.63595	12.307	Semi-arid. https://en.wikipedia.org/wiki/Zagtouli_Solar_Power_Station
7001	BURUNDI	BUHIGA	0.47	6248.9	2936.98	Hydropower	ROR	NA	NA	NA	NA	NA	0	0	30.1608	-3.0302	ROR, https://en.wikipedia.org/wiki/List_of_power_stations_in_Burundi
7002	BURUNDI	BUJUMBURA	6.05	3982	24091.1	Oil	ICE	Diesel-Engines	Dry cooling	Air	Diesel	NA	7805.51	5463.86	29.3508	-3.37325	Coast. But for size and fuel, assume that this is MCI
7003	BURUNDI	Bujumbura (interpetrol)	30	3982	119460	Oil	ICE	Diesel-Engines	Dry cooling	Air	Diesel	NA	38705	27093.5	29.3508	-3.37325	Coast. https://country.eiu.com/article.aspx?articleid=1575964141&Country=Burundi&topic=Economy&subtopic=F_9 http://www.interpetrol.bi/
7004	BURUNDI	BURASIRA	0.03	5352.4	160.572	Hydropower	ROR	NA	NA	NA	NA	NA	0	0	29.9136	-3.082	coordinates not matching, probably ROR
7005	BURUNDI	Bururi, Nyemanga Power Station	2.8	5352.4	14986.7	Hydropower	ROR	NA	NA	NA	NA	NA	0	0	29.34	-3.5789	ROR, https://en.wikipedia.org/wiki/List_of_power_stations_in_Burundi
7006	BURUNDI	BUTEZI	0.286	5352.4	1530.79	Hydropower	ROR	NA	NA	NA	NA	NA	0	0	30.1517	-3.42278	Likely a very small turbine connected into a irrigation scheme.
7007	BURUNDI	GATONDE	0.16	5352.4	856.384	Hydropower	ROR	NA	NA	NA	NA	NA	0	0	29.9508	-3.17111	ROR (very small)
7008	BURUNDI	GIKONGE	0.85	5880	4998	Hydropower	ROR	NA	NA	NA	NA	NA	0	0	29.6512	-3.2419	ROR
7009	BURUNDI	GISOZI	0.02	5352.4	107.048	Hydropower	ROR	NA	NA	NA	NA	NA	0	0	29.6789	-3.5736	ROR (very small)
7010	BURUNDI	HOPITAL DE KIREMBA	0.082	5352.4	438.897	Hydropower	ROR	NA	NA	NA	NA	NA	0	0	29.9818	-2.81784	coordinates do not match, 29,98 does not exist. Could be ROR in river nearby
7011	BURUNDI	KARENNI	0.85	5352.4	4549.54	Hydropower	ROR	NA	NA	NA	NA	NA	0	0	30.4253	-3.07454	ROR (very small)
7012	BURUNDI	KAYENZI	0.8	2688.8	2151.04	Hydropower	ROR	NA	NA	NA	NA	NA	0	0	30.3414	-2.8451	ROR, https://en.wikipedia.org/wiki/List_of_power_stations_in_Burundi
7013	BURUNDI	KIGANDA	0.053	5352.4	283.677	Hydropower	ROR	NA	NA	NA	NA	NA	0	0	29.6921	-3.348	ROR (very small)
7014	BURUNDI	KIGWENA	0.05	5352.4	267.62	Hydropower	ROR	NA	NA	NA	NA	NA	0	0	30.1616	-2.7381	ROR
7015	BURUNDI	MARANGARA	0.28	1075	301	Hydropower	ROR	NA	NA	NA	NA	NA	0	0	29.9947	-2.7428	ROR
7016	BURUNDI	MASANGO	0.036	5352.4	192.686	Hydropower	ROR	NA	NA	NA	NA	NA	0	0	29.6568	-4.0695	coordinates not matching, probably ROR
7017	BURUNDI	MPINGA	0.02	5352.4	107.048	Hydropower	ROR	NA	NA	NA	NA	NA	0	0	29.5754	-3.8964	ROR (very small)
7018	BURUNDI	MUGERA	0.03	5352.4	160.572	Hydropower	ROR	NA	NA	NA	NA	NA	0	0	29.9636	-3.32	ROR (very small)
7019	BURUNDI	MUGERE	8	3845	30760	Hydropower	ROR	NA	NA	NA	NA	NA	0	0	29.3644	-3.3822	ROR, https://en.wikipedia.org/wiki/List_of_power_stations_in_Burundi
7020	BURUNDI	MURORE	0.169	5352.4	904.556	Hydropower	ROR	NA	NA	NA	NA	NA	0	0	30.6631	-3.1871	ROR (very small)
7021	BURUNDI	MUSONGATI	0.01	5352.4	53.524	Hydropower	ROR	NA	NA	NA	NA	NA	0	0	30.1011	-3.7289	ROR (very small)
7022	BURUNDI	MUTUMBA	0.092	5352.4	492.421	Hydropower	ROR	NA	NA	NA	NA	NA	0	0	29.6918	-3.5199	ROR (very small)
7023	BURUNDI	NYABIKERE/KIDIMBWE	0.14	5352.4	749.336	Hydropower	ROR	NA	NA	NA	NA	NA	0	0	30.0549	-3.1651	ROR (very small)
7024	BURUNDI	NYEMANGA	2.84	5756.7	16349	Hydropower	ROR	NA	NA	NA	NA	NA	46108.5	46108.5	29.5867	-3.7707	ROR, https://en.wikipedia.org/wiki/List_of_power_stations_in_Burundi
7025	BURUNDI	RUVYIRONZA	1.275	3330.2	4246	Hydropower	ROR	NA	NA	NA	NA	NA	9099.9	9099.9	29.9095	-3.50025	ROR
7026	BURUNDI	RWEGURA	18	5375.7	96762.6	Hydropower	Dammed	NA	NA	NA	NA	NA	0	0	29.5194	-2.93194	reservoir. Banque de la republique de Burundi. https://www.brb.bi/fr/content/secteur-r%C3%A9el
7027	BURUNDI	RYARUSERA - Ruvyironza (river)	0.02	5352.4	107.048	Hydropower	ROR	NA	NA	NA	NA	NA	0	0	29.558	-3.3546	ROR
7028	BURUNDI	SANZU	0.072	5352.4	385.373	Hydropower	ROR	NA	NA	NA	NA	NA	0	0	30.0792	-3.4236	Could also be Ruyigi, no reservoir, ROR?
7029	BURUNDI	TEZA PLANTATION	0.36	5352.4	1926.86	Hydropower	ROR	NA	NA	NA	NA	NA	0	0	29.5636	-3.21584	ROR
8001	CAMEROON	AMPCO PLANT	10.5	2925	30712.5	NG	Brayton	Gas Turbine	No cooling	NA	Natural Gas	NA	49410.3	39528.2	8.71705	3.79003	Atlantic methanol production company in Kameroon, not Egypt. Cooling towers but for the process, not the power plant. On an island. Coast
8002	CAMEROON	BAFOUSSAM	10.62	6240	66268.8	Oil	ICE	Diesel-Engines	Dry cooling	Air	Diesel	NA	21471.1	15029.8	10.23	5.26667	Internal combustion. No water nearby
8003	CAMEROON	BAMENDA	20	6240	124800	Oil	ICE	Diesel-Engines	Dry cooling	Air	Diesel	NA	40435.2	28304.6	10.0824	5.58655	Internal combustion, many units visible. River nearby. https://www.facebook.com/story.php?story_fbid=8199190060120977&id=839578589415531&m_entstream_source=permalink&locale=ms_MY&paipv=0&eav=AfanWG529Ksorrn8xVcgDFdXeGSPUZ-AbzCLgFu5dCnyY1uagEb1LXl_wfU0EFqJTl8&_rdr
8004	CAMEROON	BESONG ABANG	0.006	5969.56	35.8173	Hydropower	ROR	NA	NA	NA	NA	NA	0	0	9.29875	5.70735	ROR (very small)
8005	CAMEROON	BUEA MUNA	0.006	5969.56	35.8173	Hydropower	ROR	NA	NA	NA	NA	NA	0	0	9.241	4.1527	ROR (very small)
8006	CAMEROON	CAPE LIMBOH, Limbé thermal power plant	85.5	6240	533520	Oil	ICE	Diesel-Engines	Dry cooling	Air	Diesel	NA	172860	121002	9.12418	4.00753	Infrastructure shows MCI. World bank documents: //efaidnbmnnnibpcajpcglclefindmkaj/https://documents1.worldbank.org/curated/en/484081468769452024/pdf/Cameroon0v1.pdf
8007	CAMEROON	DOUALA BASSA	14.14	6240	88233.6	Oil	ICE	Diesel-Engines	Dry cooling	Air	HFO	NA	28587.7	20011.4	9.76279	4.03468	Combustion engines. The google maps description indicates that it uses HFO
8008	CAMEROON	EBOLOWA EDC	10	6240	62400	Oil	ICE	Diesel-Engines	Dry cooling	Air	Diesel	NA	20217.6	14152.3	11.1498	2.9225	The images are not clear enough to locate the plant exactly, but according to the country and the fuel it must be a group of diesel engines
8009	CAMEROON	EDEA	278.5	5969.56	1.66252e+06	Hydropower	Dammed	NA	NA	NA	NA	NA	872892	872892	10.1306	3.8222	ROR
8010	CAMEROON	Eneo centrale thermique de BERTOUA	4.8	6240	29952	Oil	ICE	Diesel-Engines	Dry cooling	Air	Diesel	NA	9704.44	6793.11	13.6811	4.58936	Diesel engines with dry cooling
8011	CAMEROON	FOYER DU MARIN	0.01	1378	13.78	Sun	PV	Rooftop	No cooling	NA	Flat	Am - Tropical Monsoon	0.193003	0.135102	9.69185	4.04828	City. On a hotel roof
8012	CAMEROON	GAROUA	12	6240	74880	Oil	ICE	Diesel-Engines	Dry cooling	Air	Diesel	NA	24261.1	16982.8	13.3674	9.31438	internal combustion, many units visible. River nearby.
8013	CAMEROON	KRIBI	216	2925	631800	NG	ICE	Gas-Engines	Dry cooling	Air	Natural Gas	NA	204703	143292	9.97677	3.02568	Combustion engines with gas. Air cooling racks observed. https://en.wikipedia.org/wiki/Kribi_Power_Station
8014	CAMEROON	LAGDO	80	5969.56	477565	Hydropower	Dammed	NA	NA	NA	NA	NA	5.84911e+08	5.84911e+08	13.41	9.0394	Reservoir
8015	CAMEROON	LIMBE	10.62	6240	66268.8	Oil	ICE	Diesel-Engines	Dry cooling	Air	Diesel	NA	21471.1	15029.8	9.12432	4.00763	Near sea. Diesel engines with dry cooling
8016	CAMEROON	LOM-PANGAR	30	5969.56	179087	Hydropower	Dammed	NA	NA	NA	NA	NA	0	0	13.4	5.33333	Reservoir
8017	CAMEROON	MBALMAYO EDC	10	6240	62400	Oil	ICE	Diesel-Engines	Dry cooling	Air	Diesel	NA	20217.6	14152.3	11.5	3.51667	Probably Internal combustion. No water nearby
8018	CAMEROON	MBENGWI	0.005	5969.56	29.8478	Hydropower	ROR	NA	NA	NA	NA	NA	0	0	10	6.01667	ROR (very small)
8019	CAMEROON	MEMVE'ELE	211	0.4	84.4	Hydropower	Dammed	NA	NA	NA	NA	NA	2.53733e+06	2.53733e+06	10.2357	2.23748	reservoir
8020	CAMEROON	PALLA COTTON PLANT	2	6240	12480	Oil	ICE	Diesel-Engines	Dry cooling	Air	Diesel	NA	4043.52	2830.46	14.2892	10.5993	Too small to see it, probably a Diesel Engine for the cotton plant
8021	CAMEROON	SONARA REFINERY in Limbe	7.5	6240	46800	Oil	ICE	Diesel-Engines	Dry cooling	Air	Diesel, HFO	NA	15163.2	10614.2	9.12854	4.01393	Inside the refinery there are no indications of other types of power plants other than diesel engines for the processes, probable use of HFO
8022	CAMEROON	SONG-LOULOU	396	5969.56	2.36394e+06	Hydropower	Dammed	NA	NA	NA	NA	NA	0	0	10.27	4.04	ROR
8023	CAMEROON	TATUM	0.052	5969.56	310.417	Hydropower	ROR	NA	NA	NA	NA	NA	0	0	9.241	4.1527	ROR (very small)
8024	CAMEROON	YAOUNDE, Oyom Abang I and II	37	6240	230880	Oil	ICE	Diesel-Engines	Dry cooling	Air	Diesel	NA	74805.1	52363.5	11.4667	3.88093	Combustion engines with rack of fans. https://fr.wikipedia.org/wiki/Liste_des_centrales_%C3%A9lectriques_au_Cameroun
8025	CAMEROON	YASSA-DIBAMBA	86	6240	536640	Oil	ICE	Diesel-Engines	Dry cooling	Air	Diesel	NA	173871	121710	9.81955	3.99629	Combustion engines with diesel and possible with gas. Air cooling racks observed. https://eneocameroon.cm/index.php/fr/production/nos-sites-de-production/nos-sites-centrale-thermique-de-yassa-dibamba
9001	CAPE VERDE	ASSOMADA	0.283	2659	752.497	Oil	ICE	Diesel-Engines	Dry cooling	Air	Diesel	NA	243.809	170.666	-23.6833	15.1	By the size and fuel, it must be a small MCI generator
9002	CAPE VERDE	BOA VISTA NORTE	0.1	2659	265.9	Oil	ICE	Diesel-Engines	Dry cooling	Air	Diesel	NA	86.1515	60.3061	-22.8723	16.1334	By the size and fuel, it must be a small MCI generator
9003	CAPE VERDE	CRUZ GRANDE SANTIAGO	1.256	2659	3339.7	Oil	ICE	Diesel-Engines	Dry cooling	Air	Diesel	NA	1082.06	757.444	-23.6707	15.0958	By the size and fuel, it must be a small MCI generator
9004	CAPE VERDE	ESPARGOS	8	2827	22616	Wind	Wind turbine	Onshore	No cooling	NA	NA	NA	0.00299638	0.00299638	-22.9297	16.7266	Wind farm
9005	CAPE VERDE	LAZARETO	7.7	2659	20474.3	Oil	ICE	Diesel-Engines	Dry cooling	Air	Diesel	NA	6633.67	4643.57	-25.0138	16.8708	Combustion engines.
9006	CAPE VERDE	MATAO	0.015	2827	42.405	Wind	Wind turbine	Onshore	No cooling	NA	NA	NA	5.61821e-06	5.61821e-06	-23.6427	15.2099	Wind farm
9007	CAPE VERDE	MATIOTA	14.088	2659	37460	Oil	ICE	Diesel-Engines	Dry cooling	Air	Diesel	NA	12137	8495.92	-25.0139	16.8709	Combustion engines.
9008	CAPE VERDE	Monte de SAO FILIPE	9.35	3428	32051.8	Wind	Wind turbine	Onshore	No cooling	NA	NA	NA	0.00424652	0.00424652	-24.4964	14.8928	http://www.ecowrex.org/eg/cabeolica-santiago-monte-sao-filipe
9009	CAPE VERDE	MORABEZA HOTEL	0.075	2827	212.025	Wind	Wind turbine	Onshore	No cooling	NA	NA	NA	2.80911e-05	2.80911e-05	-22.9	16.6	Wind farm
9010	CAPE VERDE	MOSTEIROS DE TRAS	0.255	2659	678.045	Oil	ICE	Diesel-Engines	Dry cooling	Air	Diesel	NA	219.686	153.78	-24.318	15.0245	By the size and fuel, it must be a small MCI generator
9011	CAPE VERDE	MT MONTONA	0.9	2827	2544.3	Wind	Wind turbine	Onshore	No cooling	NA	NA	NA	0.000337093	0.000337093	-24.9913	16.8973	Wind farm
9012	CAPE VERDE	MT R JULIAO	0.3	2827	848.1	Wind	Wind turbine	Onshore	No cooling	NA	NA	NA	0.000112364	0.000112364	-25.0047	16.8745	Wind farm
9013	CAPE VERDE	MT SAO FELIPE	0.9	2827	2544.3	Wind	Wind turbine	Onshore	No cooling	NA	NA	NA	0.000337093	0.000337093	-24.5009	14.9219	Wind farm
9014	CAPE VERDE	NOVA SINTRA	0.15	2827	424.05	Wind	Wind turbine	Onshore	No cooling	NA	NA	NA	5.61821e-05	5.61821e-05	-24.6919	14.8678	Wind farm
9015	CAPE VERDE	NOVA SINTRA, centrale eletrica de Favetal	1.015	2659	2698.88	Oil	ICE	Diesel-Engines	Dry cooling	Air	Diesel	NA	874.438	612.107	-24.6909	14.8888	Power plant with a group of diesel generators
9016	CAPE VERDE	PALMAREJO	71	2659	188789	Oil	ICE	Diesel-Engines	Dry cooling	Air	Diesel	NA	61167.6	42817.3	-23.5463	14.9077	Near sea. Internal combustion, more units.
9017	CAPE VERDE	PALMEIRA ELECTRA	11.575	2659	30777.9	Oil	ICE	Diesel-Engines	Dry cooling	Air	Diesel	NA	9972.04	6980.43	-22.9856	16.7565	Combustion engines.
9018	CAPE VERDE	PALMEIRA ELECTRA	0.6	2827	1696.2	Wind	Wind turbine	Onshore	No cooling	NA	NA	NA	0.000224729	0.000224729	-22.9833	16.7667	Wind farm
9019	CAPE VERDE	PAUL	0.456	2659	1212.5	Oil	ICE	Diesel-Engines	Dry cooling	Air	Diesel	NA	392.851	274.996	-25.0151	17.1503	By the size and fuel, it must be a small MCI generator
9020	CAPE VERDE	PEDRA BADEJO	0.51	2659	1356.09	Oil	ICE	Diesel-Engines	Dry cooling	Air	Diesel	NA	439.373	307.561	-23.5379	15.1378	By the size and fuel, it must be a small MCI generator
9021	CAPE VERDE	PONTA LAPA	0.184	2659	489.256	Oil	ICE	Diesel-Engines	Dry cooling	Air	Diesel	NA	158.519	110.963	-23.1667	15.3333	By the size and fuel, it must be a small MCI generator
9022	CAPE VERDE	PORTO INGLES	0.735	2659	1954.37	Oil	ICE	Diesel-Engines	Dry cooling	Air	Diesel	NA	633.214	443.25	-23.2167	15.1333	By the size and fuel, it must be a small MCI generator
9023	CAPE VERDE	PORTO INGLES	0.18	2827	508.86	Wind	Wind turbine	Onshore	No cooling	NA	NA	NA	6.74186e-05	6.74186e-05	-23.2167	15.1333	Wind farm
9024	CAPE VERDE	PORTO MOSQUITO	0.096	2659	255.264	Oil	ICE	Diesel-Engines	Dry cooling	Air	Diesel	NA	82.7055	57.8938	-23.7	14.95	By the size and fuel, it must be a small MCI generator
9025	CAPE VERDE	PORTO NOVO ELECTRA	0.32	2659	850.88	NG	ICE	Gas-Engines	Dry cooling	Air	Natural Gas	NA	275.685	192.979	-25.0647	17.0197	By the size and fuel, it must be a small MCI generator
9026	CAPE VERDE	PRAIA	24.384	2659	64837.1	Oil	ICE	Diesel-Engines	Dry cooling	Air	Diesel	NA	21007.2	14705	-23.5105	14.9154	Combustion engines.
9027	CAPE VERDE	RABIL	0.06	2659	159.54	Oil	ICE	Diesel-Engines	Dry cooling	Air	Diesel	NA	51.6909	36.1836	-22.8833	16.1333	By the size and fuel, it must be a small MCI generator
9028	CAPE VERDE	RIBEIRA BRAVA	0.872	2659	2318.65	Oil	ICE	Diesel-Engines	Dry cooling	Air	Diesel	NA	751.241	525.869	-24.2	16.3267	By the size and fuel, it must be a small MCI generator
9029	CAPE VERDE	RIBEIRA DE BARCA	0.068	2659	180.812	Oil	ICE	Diesel-Engines	Dry cooling	Air	Diesel	NA	58.583	41.0081	-23.7667	15.1333	By the size and fuel, it must be a small MCI generator
9030	CAPE VERDE	RIBEIRA GRANDE ELECTRA	1.96	2659	5211.64	Oil	ICE	Diesel-Engines	Dry cooling	Air	Diesel	NA	1688.57	1182	-24.5924	16.5256	By its size and fuel I assume it is an ICE with diesel
9031	CAPE VERDE	SAL PRAIA	5.01	2659	13321.6	Oil	ICE	Diesel-Engines	Dry cooling	Air	Diesel	NA	4316.19	3021.33	-22.9297	16.7266	Combustion engines.
9032	CAPE VERDE	SAL SOLAR	2.5	1644.8	4112	Sun	PV	Land	No cooling	NA	Flat	BWh - Desert Hot	404.706	283.294	-22.914	16.6272	Semi-arid. https://gestoenergy.com/project/sal-25-mw-solar-pv-development-cape-verde/
9033	CAPE VERDE	SAL-REI	0.752	2659	1999.57	Oil	ICE	Diesel-Engines	Dry cooling	Air	Diesel	NA	647.86	453.502	-22.5567	16.1033	By the size and fuel, it must be a small MCI generator
9034	CAPE VERDE	SAL-REI	0.125	2827	353.375	Wind	Wind turbine	Onshore	No cooling	NA	NA	NA	4.68184e-05	4.68184e-05	-22.9167	16.1833	Wind farm
9035	CAPE VERDE	SAL-REI-2	4	2827	11308	Wind	Wind turbine	Onshore	No cooling	NA	NA	NA	0.00149819	0.00149819	-22.8078	16.095	Wind farm
9036	CAPE VERDE	SANTA CATARINA SANTIAGO	0.04	2659	106.36	Oil	ICE	Diesel-Engines	Dry cooling	Air	Diesel	NA	34.4606	24.1224	-23.6708	15.094	By its size and fuel I assume it is an ICE with diesel
9037	CAPE VERDE	SANTA CATARINA SANTIAGO	0.055	2827	155.485	Wind	Wind turbine	Onshore	No cooling	NA	NA	NA	2.06001e-05	2.06001e-05	-23.6708	15.094	Wind farm
9038	CAPE VERDE	SANTIAGO SOLAR	4.4	794.5	3495.8	Sun	PV	Land	No cooling	NA	Flat	BWh - Desert Hot	344.059	240.841	-23.5439	14.9104	Semi-arid. http://www.ecowrex.org/eg/santiago-solar-pv-plant
9039	CAPE VERDE	SAO DOMINGOS CV	0.076	2659	202.084	Oil	ICE	Diesel-Engines	Dry cooling	Air	Diesel	NA	65.4752	45.8326	-23.5625	15.0244	By the size and fuel, it must be a small MCI generator
9040	CAPE VERDE	SELADA DE FLAMENGO	6	2827	16962	Wind	Wind turbine	Onshore	No cooling	NA	NA	NA	0.00224729	0.00224729	-24.9939	16.8732	Wind farm
9041	CAPE VERDE	TARRAFAL	0.198	2659	526.482	Oil	ICE	Diesel-Engines	Dry cooling	Air	Diesel	NA	170.58	119.406	-23.7667	15.2833	By the size and fuel, it must be a small MCI generator
9042	CAPE VERDE	TARRAFAL NICOLAU	0.52	2659	1382.68	Oil	ICE	Diesel-Engines	Dry cooling	Air	Diesel	NA	447.988	313.592	-23.7667	15.2833	By the size and fuel, it must be a small MCI generator
9043	CAPE VERDE	VALE DE CUSTA	0.04	2659	106.36	Oil	ICE	Diesel-Engines	Dry cooling	Air	Diesel	NA	34.4606	24.1224	-23.4713	14.9899	By its size and fuel I assume it is an ICE with diesel
9044	CAPE VERDE	VALE DE CUSTA	0.018	903.2	16.2576	Sun	PV	Land	No cooling	NA	Flat	BWh - Desert Hot	1.60008	1.12006	-23.4713	14.9899	Semi-arid.
9045	CAPE VERDE	VALE DE CUSTA	0.014	2827	39.578	Wind	Wind turbine	Onshore	No cooling	NA	NA	NA	5.24367e-06	5.24367e-06	-23.4713	14.9899	Wind farm
9046	CAPE VERDE	VARIANTE	0.212	2659	563.708	Oil	ICE	Diesel-Engines	Dry cooling	Air	Diesel	NA	182.641	127.849	-23.5309	14.9758	By the size and fuel, it must be a small MCI generator
10001	CENTRAL AFRICAN REPUBLIC	BAKOUMA	0.011	7174.6	78.9206	Hydropower	ROR	NA	NA	NA	NA	NA	0	0	22.8184	4.74132	ROR, but too small to find
10002	CENTRAL AFRICAN REPUBLIC	BAMBARI	0.625	191	119.375	Oil	ICE	Diesel-Engines	Dry cooling	Air	Diesel	NA	38.6775	27.0742	20.6757	5.76795	City along Ouaka river, newspaper shows a cooling tower. However, images too vague, location not found. It says that the power plant was vandalized Source: United Nations Development program. Promotion of small hydropower-based mini-grids for a better access to modern energy services in Central African Republic. Inventory of diesel generating capacity page 9 https://www.thegef.org/projects-operat…
10003	CENTRAL AFRICAN REPUBLIC	BANGASSOU	0.16	191	30.56	Oil	ICE	Diesel-Engines	Dry cooling	Air	Diesel	NA	9.90143	6.931	22.8184	4.74132	Source: United Nations Development program. Promotion of small hydropower-based mini-grids for a better access to modern energy services in Central African Republic. Inventory of diesel generating capacity page 9 https://www.thegef.org/projects-operations/projects/9291
10004	CENTRAL AFRICAN REPUBLIC	BANGUI ENERCA	2	191	382	Oil	ICE	Diesel-Engines	Dry cooling	Air	Diesel	NA	123.768	86.6375	18.3467	4.2155	Six diesel generators, but only one in operation. African Economic Outlook 2009 Country Notes: Volumes 1 and 2: OECD Publishing. ISBN 978-92-64-07618-1.
10005	CENTRAL AFRICAN REPUBLIC	BERBERATI	0.8	191	152.8	Oil	ICE	Diesel-Engines	Dry cooling	Air	Diesel	NA	49.5072	34.655	15.7922	4.26117	Source: United Nations Development program. Promotion of small hydropower-based mini-grids for a better access to modern energy services in Central African Republic. Inventory of diesel generating capacity page 9 https://www.thegef.org/projects-operations/projects/9291
10006	CENTRAL AFRICAN REPUBLIC	BOALI-I	8.75	7174.6	62777.8	Hydropower	Dammed	NA	NA	NA	NA	NA	121349	121349	18.0016	4.9196	reservoir
10007	CENTRAL AFRICAN REPUBLIC	BOALI-II	20	7174.6	143492	Hydropower	Dammed	NA	NA	NA	NA	NA	3.50724e+06	3.50724e+06	16.1912	5.97287	reservoir
10008	CENTRAL AFRICAN REPUBLIC	BOALI-III	10	7174.6	71746	Hydropower	Dammed	NA	NA	NA	NA	NA	0	0	16.1643	5.93973	reservoir
10009	CENTRAL AFRICAN REPUBLIC	BOSSANGOA	0.15	191	28.65	Oil	ICE	Diesel-Engines	Dry cooling	Air	Diesel	NA	9.28259	6.49781	17.4552	6.49263	By the size and fuel, it must be a small MCI generator
10010	CENTRAL AFRICAN REPUBLIC	BOUAR	0.5	191	95.5	Oil	ICE	Diesel-Engines	Dry cooling	Air	Diesel	NA	30.942	21.6594	15.596	5.93404	Location not found, but mentioned in newspaper though. https://www.rjdhrca.org/centrafrique-la-ville-de-bouar-manque-delectricite-depuis-plus-de-4-mois/ Source: United Nations Development program. Promotion of small hydropower-based mini-grids for a better access to modern energy services in Central African Republic. Inventory of diesel generating capacity page 9 https://www.thegef.org/projects-o…
10011	CENTRAL AFRICAN REPUBLIC	GAMBOULA HOSPITAL	0.09	7174.6	645.714	Hydropower	ROR	NA	NA	NA	NA	NA	0	0	15.1393	4.11775	Could be ROR, but not found. Too small?
10012	CENTRAL AFRICAN REPUBLIC	Kaga-Bandoro	1.9	191	362.9	Hydropower	ROR	NA	NA	NA	NA	NA	0	0	19.188	6.9169	ROR. Table in UNDP report, Source: Ministry of Mines, Energy and Hydraulics, 2016
10013	CENTRAL AFRICAN REPUBLIC	KEMBE	0.1	191	19.1	Oil	ICE	Diesel-Engines	Dry cooling	Air	Diesel	NA	6.1884	4.33188	21.8864	4.62275	Source: United Nations Development program. Promotion of small hydropower-based mini-grids for a better access to modern energy services in Central African Republic. Inventory of diesel generating capacity page 9 https://www.thegef.org/projects-operations/projects/9291
10014	CENTRAL AFRICAN REPUBLIC	M’BAÏKI (P)	0.125	191	23.875	Oil	ICE	Diesel-Engines	Dry cooling	Air	Diesel	NA	7.73549	5.41485	17.5948	3.52	Source: United Nations Development program. Promotion of small hydropower-based mini-grids for a better access to modern energy services in Central African Republic. Inventory of diesel generating capacity page 9 https://www.thegef.org/projects-operations/projects/9291
10015	CENTRAL AFRICAN REPUBLIC	M'BALI	0.225	191	42.975	Oil	ICE	Diesel-Engines	Dry cooling	Air	Diesel	NA	13.9239	9.74672	22.2175	7.60701	By the size and fuel, it must be a small MCI generator
10016	CENTRAL AFRICAN REPUBLIC	MONGOUMBA	0.04	191	7.64	Oil	ICE	Diesel-Engines	Dry cooling	Air	Diesel	NA	2.47536	1.73275	18.3547	3.3814	Source: United Nations Development program. Promotion of small hydropower-based mini-grids for a better access to modern energy services in Central African Republic. Inventory of diesel generating capacity page 9 https://www.thegef.org/projects-operations/projects/9291
10017	CENTRAL AFRICAN REPUBLIC	MONGOUMBA	0.095	191	18.145	Oil	ICE	Diesel-Engines	Dry cooling	Air	Diesel	NA	5.87898	4.11528	18.5936	3.64153	By the size and fuel, it must be a small MCI generator
10018	CENTRAL AFRICAN REPUBLIC	PAOUA	0.15	191	28.65	Oil	ICE	Diesel-Engines	Dry cooling	Air	Diesel	NA	9.28259	6.49781	16.4406	7.24269	Source: United Nations Development program. Promotion of small hydropower-based mini-grids for a better access to modern energy services in Central African Republic. Inventory of diesel generating capacity page 9 https://www.thegef.org/projects-operations/projects/9291
11001	CHAD	ABECHE	0.5	2681	1340.5	Oil	ICE	Diesel-Engines	Dry cooling	Air	Diesel	NA	434.322	304.025	20.8324	13.8292	By the size and fuel, it must be a small MCI generator
11002	CHAD	AM TIMAN	0.5	2681	1340.5	Oil	ICE	Diesel-Engines	Dry cooling	Air	Diesel	NA	434.322	304.025	20.2862	11.0446	By the size and fuel, it must be a small MCI generator
11003	CHAD	AMDJARASS	1.1	8090.9	8899.99	Wind	Wind turbine	Onshore	No cooling	NA	NA	NA	0.00117915	0.00117915	22.8431	16.0659	Wind farm
11004	CHAD	BAIBOKOUM	0.54	2681	1447.74	Oil	ICE	Diesel-Engines	Dry cooling	Air	Diesel	NA	469.067	328.347	15.694	7.745	By the size and fuel, it must be a small MCI generator
11005	CHAD	BAORE CEMENT FACTORY	10	2681	26810	Oil	ICE	Diesel-Engines	Dry cooling	Air	Diesel	NA	8686.43	6080.5	14.6	9.26667	Internal combustion, individual chimneys. No fans. Near river.
11006	CHAD	BARDAI	1	2681	2681	Oil	ICE	Diesel-Engines	Dry cooling	Air	Diesel	NA	868.643	608.05	17.0167	21.3333	By its size an location I assume ti is a diesel generator.
11007	CHAD	BEBEDJA	0.9	2681	2412.9	Oil	ICE	Diesel-Engines	Dry cooling	Air	Diesel	NA	781.779	547.245	16.5761	8.67065	By the size and fuel, it must be a small MCI generator
11008	CHAD	BILTINE	0.58	2681	1554.98	Oil	ICE	Diesel-Engines	Dry cooling	Air	Diesel	NA	503.813	352.669	20.9238	14.5258	By the size and fuel, it must be a small MCI generator
11009	CHAD	BOULANGERIE LA ROTATIVE	0.75	2681	2010.75	Oil	ICE	Diesel-Engines	Dry cooling	Air	Diesel	NA	651.482	456.038	15.0491	12.1365	By the size and fuel, it must be a small MCI generator
11010	CHAD	DJARMAYA REFINERY	60	2681	160860	Oil	Rankine	Steam Turbine	Wet tower	Freshwater	HFO	BSh - Arid Steppe - Hot	730706	669813	15.101	12.4141	Wet tower
11011	CHAD	DOBA KOME	90	2680	241200	NG	ICE	Gas-Engines	Dry cooling	Air	Natural Gas	NA	78148.7	54704.1	16.85	8.65	Internal combustion engines, several units visible. No river.
11012	CHAD	DOBA KOME	120	2681	321720	Oil	ICE	Diesel-Engines	Dry cooling	Air	Diesel	NA	104237	72966	16.796	8.53248	Internal combustion engines, several units visible. No river.
11013	CHAD	FARCHA	22	2681	58982	Oil	ICE	Diesel-Engines	Dry cooling	Air	Diesel	NA	19110.2	13377.1	15.013	12.1314	Racks of fans, so dry cooling
11014	CHAD	FIANGA	0.54	2681	1447.74	Oil	ICE	Diesel-Engines	Dry cooling	Air	Diesel	NA	469.067	328.347	15.1405	9.91919	By the size and fuel, it must be a small MCI generator
11015	CHAD	GORE LA NYA	0.54	2681	1447.74	Oil	ICE	Diesel-Engines	Dry cooling	Air	Diesel	NA	469.067	328.347	16.635	7.92889	By the size and fuel, it must be a small MCI generator
11016	CHAD	HOPITAL N'DJAMENA	0.4	2681	1072.4	Oil	ICE	Diesel-Engines	Dry cooling	Air	Diesel	NA	347.457	243.22	15.0466	12.1054	By the size and fuel, it must be a small MCI generator
11017	CHAD	HOTEL MERIDEIN	0.27	2681	723.87	Oil	ICE	Diesel-Engines	Dry cooling	Air	Diesel	NA	234.534	164.174	15.05	12.1178	By the size and fuel, it must be a small MCI generator
11018	CHAD	HOTEL NOVOTEL	0.4	2681	1072.4	Oil	ICE	Diesel-Engines	Dry cooling	Air	Diesel	NA	347.457	243.22	15.0505	12.1046	By the size and fuel, it must be a small MCI generator
11019	CHAD	KOUMRA HEALTH CENTER	0.004	1500	6	Sun	PV	Rooftop	No cooling	NA	Flat	Aw - Tropical Savannah	0.0840361	0.0588253	17.5505	8.91727	City. I cannot see it, but for its size I assume it is Rooftop
11020	CHAD	KOUMRA SCHOOL	0.013	1500	19.5	Sun	PV	Rooftop	No cooling	NA	Flat	Aw - Tropical Savannah	0.273117	0.191182	17.5717	8.92299	Forest. On top of a school
11021	CHAD	LERE	0.54	2681	1447.74	Oil	ICE	Diesel-Engines	Dry cooling	Air	Diesel	NA	469.067	328.347	14.2251	9.65549	By the size and fuel, it must be a small MCI generator
11022	CHAD	MAO KANEM	0.5	2681	1340.5	Oil	ICE	Diesel-Engines	Dry cooling	Air	Diesel	NA	434.322	304.025	15.319	14.131	By the size and fuel, it must be a small MCI generator
11023	CHAD	MONGO	0.5	2681	1340.5	Oil	ICE	Diesel-Engines	Dry cooling	Air	Diesel	NA	434.322	304.025	18.6918	12.1863	By the size and fuel, it must be a small MCI generator
11024	CHAD	N'DJAMENA	22	2681	58982	Oil	ICE	Diesel-Engines	Dry cooling	Air	Diesel	NA	19110.2	13377.1	15.072	12.0894	Internal combustion engines, several units visible. Along river.
11025	CHAD	N'DJAMENA PUMPING	0.44	2681	1179.64	Oil	ICE	Diesel-Engines	Dry cooling	Air	Diesel	NA	382.203	267.542	15.1103	12.1424	By the size and fuel, it must be a small MCI generator
11026	CHAD	N'DJAMENA WBG	0.265	2681	710.465	Oil	ICE	Diesel-Engines	Dry cooling	Air	Diesel	NA	230.19	161.133	15.0481	12.1036	By the size and fuel, it must be a small MCI generator
11027	CHAD	OUM HADJER	0.5	2681	1340.5	Oil	ICE	Diesel-Engines	Dry cooling	Air	Diesel	NA	434.322	304.025	19.6907	13.292	By the size and fuel, it must be a small MCI generator
11028	CHAD	SARH	2.75	2681	7372.75	Oil	ICE	Diesel-Engines	Dry cooling	Air	Diesel	NA	2388.77	1672.14	18.3923	9.1429	By its size an location I assume ti is a diesel generator.
11029	CHAD	SARH CREFELD	0.002	1500	3	Sun	PV	Rooftop	No cooling	NA	Flat	Aw - Tropical Savannah	0.0420181	0.0294126	18.3923	9.1429	City. I cannot see it, but for its size I assume it is Rooftop
12001	COMOROS	BANDRAMADJI	0.1	2681	268.1	Oil	ICE	Diesel-Engines	Dry cooling	Air	Diesel	NA	86.8643	60.805	43.4444	-11.7844	By the size and fuel, it must be a small MCI generator
12002	COMOROS	BIMBINI RESORT	0.2	2681	536.2	Oil	ICE	Diesel-Engines	Dry cooling	Air	Diesel	NA	173.729	121.61	44.2372	-12.195	By the size and fuel, it must be a small MCI generator
12003	COMOROS	FOMBONI	1.9	2681	5093.9	Oil	ICE	Diesel-Engines	Dry cooling	Air	Diesel	NA	1650.42	1155.3	43.7425	-12.28	By its size and fuel I assume it is an ICE with diesel
12004	COMOROS	FOUMBONI	1.2	2681	3217.2	Oil	ICE	Diesel-Engines	Dry cooling	Air	Diesel	NA	1042.37	729.66	43.4842	-11.8617	By the size and fuel, it must be a small MCI generator
12005	COMOROS	LINGONI	0.3	191	57.3	Hydropower	ROR	NA	NA	NA	NA	NA	0	0	44.4112	-12.2686	ROR
12006	COMOROS	MBENI	0.344	2681	922.264	Oil	ICE	Diesel-Engines	Dry cooling	Air	Diesel	NA	298.813	209.169	43.3775	-11.5014	By the size and fuel, it must be a small MCI generator
12007	COMOROS	MIRINGONI	0.022	191	4.202	Hydropower	ROR	NA	NA	NA	NA	NA	0	0	43.6353	-12.2967	ROR
12008	COMOROS	ONGONI, BARRAGE MAHARANI	0.07	191	13.37	Hydropower	ROR	NA	NA	NA	NA	NA	0	0	44.5183	-12.1989	ROR
12009	COMOROS	TRATINGA	0.3	191	57.3	Hydropower	ROR	NA	NA	NA	NA	NA	0	0	44.4615	-12.2073	Location not found. Likely a very small turbine working in an irrigation scheme
12010	COMOROS	TRENANI	5.1	2681	13673.1	Oil	ICE	Diesel-Engines	Dry cooling	Air	Diesel	NA	4430.08	3101.06	44.4173	-12.242	Diesel engines
12011	COMOROS	VOIDJOU	9.6	2681	25737.6	Oil	ICE	Diesel-Engines	Dry cooling	Air	Diesel	NA	8338.98	5837.28	43.263	-11.6495	Near sea. data on comoros from official government documents: https://www.cif.org/sites/default/files/meeting-documents/comoros_eoi_0.pdf
12012	COMOROS	VOIDJOU NEW ITSAMBOUNI	6.2	2681	16622.2	Oil	ICE	Diesel-Engines	Dry cooling	Air	Diesel	NA	5385.59	3769.91	43.2453	-11.7081	Diesel engines
13001	CONGO (REPUBLIC OF THE CONGO)	COTE MATEVE (pointe noire SNE)	484	2349	1136916	NG	Brayton	Gas Turbine	No cooling	NA	Natural Gas	NA	1.82907e+06	1.46326e+06	11.9162	-4.89122	Three units of Gas turibnes. https://www.gem.wiki/Centrale_%C3%89lectrique_du_Congo_(CEC)_power_station
13002	CONGO (REPUBLIC OF THE CONGO)	DJENO ENI	36	2349	84564	NG	ICE	Gas-Engines	Dry cooling	Air	Natural Gas	NA	27398.7	19179.1	11.9364	-4.91787	Combustion engines working with NG
13003	CONGO (REPUBLIC OF THE CONGO)	DJENO TOTAL	25	2349	58725	NG	ICE	Gas-Engines	Dry cooling	Air	Natural Gas	NA	19026.9	13318.8	11.9342	-4.9171	Combustion engines working with NG
13004	CONGO (REPUBLIC OF THE CONGO)	IMBOULOU	120	5803.99	696479	Hydropower	Dammed	NA	NA	NA	NA	NA	6.82406e+07	6.82406e+07	16.0337	-2.93561	reservoir. OWS: 53.5 km2 https://www.gem.wiki/Imboulou_hydroelectric_plant https://www.power-technology.com/marketdata/power-plant-profile-imboulou-democratic-republic-of-the-congo/
13005	CONGO (REPUBLIC OF THE CONGO)	LIOUESSO	19.9	5803.99	115499	Hydropower	Dammed	NA	NA	NA	NA	NA	8.8649e+06	8.8649e+06	15.6781	1.09634	reservoir. Check whether this was constructed before 2020. OWS: 6.95 km2 https://tractebel-engie.com/en/references/liouesso-hydropower-project
13006	CONGO (REPUBLIC OF THE CONGO)	M'BOUNDI GAS PLANT	1.956	2349	4594.64	NG	ICE	Gas-Engines	Dry cooling	Air	Natural Gas	NA	1488.66	1042.06	11.8567	-4.77324	Small, surely combustion engine with NG
13007	CONGO (REPUBLIC OF THE CONGO)	MOUKOUKOULOU	74	5803.99	429495	Hydropower	ROR	NA	NA	NA	NA	NA	67188.2	67188.2	13.7636	-3.89556	ROR (waterfall). OWS: 71806 m2 https://www.hydroreview.com/world-regions/africa/congo-republic-restores-74-mw-moukoukoulou/#gref
14001	CONGO DEMOCRATIC REPUBLIC	AKPERIKASENDE	0.071	3626.7	257.496	Hydropower	ROR	NA	NA	NA	NA	NA	0	0	26.7579	2.98459	ROR (very small)
14002	CONGO DEMOCRATIC REPUBLIC	Ambarau (Kibali gold mines)	11	3626.7	39893.7	Hydropower	ROR	NA	NA	NA	NA	NA	37756.7	37756.7	29.5828	-3.08453	ROR
14003	CONGO DEMOCRATIC REPUBLIC	AMBWE	1.6	3626.7	5802.72	Hydropower	ROR	NA	NA	NA	NA	NA	46949.1	46949.1	26.2895	-2.71493	ROR
14004	CONGO DEMOCRATIC REPUBLIC	Azambi (Kibali gold mines)	11	3626.7	39893.7	Hydropower	ROR	NA	NA	NA	NA	NA	80763	80763	29.5828	-3.08453	ROR
14005	CONGO DEMOCRATIC REPUBLIC	BASANKUSU	0.4	315	126	Oil	ICE	Diesel-Engines	Dry cooling	Air	Diesel	NA	40.824	28.5768	19.8008	1.21744	By the size and fuel, it must be a small MCI generator
14006	CONGO DEMOCRATIC REPUBLIC	BIBANGA	0.063	3626.7	228.482	Hydropower	ROR	NA	NA	NA	NA	NA	0	0	23.9333	-6.25	ROR (very small)
14007	CONGO DEMOCRATIC REPUBLIC	BOKENDA	0.2	315	63	Oil	ICE	Diesel-Engines	Dry cooling	Air	Diesel	NA	20.412	14.2884	19.1971	2.29137	By the size and fuel, it must be a small MCI generator
14008	CONGO DEMOCRATIC REPUBLIC	BRAKASAI-KANANGA	0.2	315	63	Oil	ICE	Diesel-Engines	Dry cooling	Air	Diesel	NA	20.412	14.2884	22.4178	-5.89583	By the size and fuel, it must be a small MCI generator
14009	CONGO DEMOCRATIC REPUBLIC	BUMBA	1.2	315	378	Oil	ICE	Diesel-Engines	Dry cooling	Air	Diesel	NA	122.472	85.7303	22.476	2.211	This is not Bumba, but the province Bimba
14010	CONGO DEMOCRATIC REPUBLIC	BUTA	0.2	315	63	Oil	ICE	Diesel-Engines	Dry cooling	Air	Diesel	NA	20.412	14.2884	29.0845	4.15317	By the size and fuel, it must be a small MCI generator
14011	CONGO DEMOCRATIC REPUBLIC	DRODRO	0.092	3626.7	333.656	Hydropower	ROR	NA	NA	NA	NA	NA	0	0	30.9833	2.3	ROR (very small)
14012	CONGO DEMOCRATIC REPUBLIC	FRANZ AHN BUKAVU	0.058	3626.7	210.349	Hydropower	ROR	NA	NA	NA	NA	NA	0	0	28.8608	-2.50833	ROR (very small)
14013	CONGO DEMOCRATIC REPUBLIC	HAUT KATANGA	4	315	1260	Oil	ICE	Diesel-Engines	Dry cooling	Air	Diesel	NA	408.24	285.768	27.4908	-11.5202	Very likely a small group of diesel engines for backup of the region
14014	CONGO DEMOCRATIC REPUBLIC	IFWANZONDO	0.132	3626.7	478.724	Hydropower	ROR	NA	NA	NA	NA	NA	0	0	19.5895	-4.96261	ROR (very small)
14015	CONGO DEMOCRATIC REPUBLIC	ILEBO	1.4	315	441	Oil	ICE	Diesel-Engines	Dry cooling	Air	Diesel	NA	142.884	100.019	20.5785	-4.32284	Diesel generator in the fuel storage facility
14016	CONGO DEMOCRATIC REPUBLIC	INDUFOR PLANT	0.4	315	126	Oil	ICE	Diesel-Engines	Dry cooling	Air	Diesel	NA	40.824	28.5768	27.514	-11.6782	By the size and fuel, it must be a small MCI generator
14017	CONGO DEMOCRATIC REPUBLIC	INGA-I	172	3626.7	623792	Hydropower	Dammed	NA	NA	NA	NA	NA	2.61965e+06	2.61965e+06	13.6218	-5.5162	ROR
14018	CONGO DEMOCRATIC REPUBLIC	INGA-II	830	3626.7	3010161	Hydropower	Dammed	NA	NA	NA	NA	NA	90531.6	90531.6	13.621	-5.5279	ROR
14019	CONGO DEMOCRATIC REPUBLIC	ISIRO	0.6	315	189	Oil	ICE	Diesel-Engines	Dry cooling	Air	Diesel	NA	61.236	42.8652	28.3193	1.65129	By the size and fuel, it must be a small MCI generator
14020	CONGO DEMOCRATIC REPUBLIC	ISIRO HAUT	0.8	315	252	Oil	ICE	Diesel-Engines	Dry cooling	Air	Diesel	NA	81.6479	57.1536	28.3193	1.65129	By the size and fuel, it must be a small MCI generator
14021	CONGO DEMOCRATIC REPUBLIC	KABOLO	0.4	315	126	Oil	ICE	Diesel-Engines	Dry cooling	Air	Diesel	NA	40.824	28.5768	29.0436	-5.11861	By the size and fuel, it must be a small MCI generator
14022	CONGO DEMOCRATIC REPUBLIC	KAKOBOLA	10.5	3626.7	38080.3	Hydropower	Dammed	NA	NA	NA	NA	NA	2.63278e+06	2.63278e+06	19.301	-5.74422	Reservoir
14023	CONGO DEMOCRATIC REPUBLIC	KALIMA	6.9	3626.7	25024.2	Hydropower	ROR	NA	NA	NA	NA	NA	11737.3	11737.3	26.2895	-2.71493	ROR
14024	CONGO DEMOCRATIC REPUBLIC	KANANGA	2.65	315	834.75	Oil	ICE	Diesel-Engines	Dry cooling	Air	Diesel	NA	270.459	189.321	22.4178	-5.89583	Very likely a small group of diesel engines for backup of the region
14025	CONGO DEMOCRATIC REPUBLIC	KARAWA/ZULU FALLS	0.284	3626.7	1029.98	Hydropower	ROR	NA	NA	NA	NA	NA	0	0	20.2963	3.32167	ROR (very small)
14026	CONGO DEMOCRATIC REPUBLIC	KASENGA	0.2	315	63	Oil	ICE	Diesel-Engines	Dry cooling	Air	Diesel	NA	20.412	14.2884	26.7575	-10.6292	By the size and fuel, it must be a small MCI generator
14027	CONGO DEMOCRATIC REPUBLIC	KASIWA	0.15	3626.7	544.005	Hydropower	ROR	NA	NA	NA	NA	NA	0	0	27.0167	-7.15	ROR (very small)
14028	CONGO DEMOCRATIC REPUBLIC	KATANDA PLANT	0.6	315	189	Oil	ICE	Diesel-Engines	Dry cooling	Air	Diesel	NA	61.236	42.8652	23.9031	-6.32991	By the size and fuel, it must be a small MCI generator
14029	CONGO DEMOCRATIC REPUBLIC	KIKWIT	0.068	3626.7	246.616	Hydropower	ROR	NA	NA	NA	NA	NA	0	0	18.8162	-5.04098	ROR (very small)
14030	CONGO DEMOCRATIC REPUBLIC	KIKWIT (SNEL)	0.6	315	189	Oil	ICE	Diesel-Engines	Dry cooling	Air	Diesel	NA	61.236	42.8652	18.8162	-5.04098	By the size and fuel, it must be a small MCI generator
14031	CONGO DEMOCRATIC REPUBLIC	KINDU	0.6	315	189	Oil	ICE	Diesel-Engines	Dry cooling	Air	Diesel	NA	61.236	42.8652	25.9231	-2.94922	By the size and fuel, it must be a small MCI generator
14032	CONGO DEMOCRATIC REPUBLIC	KINKASI	14.5	138	2001	NG	Brayton	Gas Turbine	No cooling	NA	Natural Gas	NA	3219.21	2575.37	15.0925	-4.69528	No location found. https://www.gem.wiki/Kinkasi_power_station
14033	CONGO DEMOCRATIC REPUBLIC	KINLAO REFINERY	1.8	315	567	Oil	ICE	Diesel-Engines	Dry cooling	Air	Diesel	NA	183.708	128.595	12.4203	-5.96869	Diesel generators for the refinery Takes water from a river that 300 m further ends in the sea
14034	CONGO DEMOCRATIC REPUBLIC	KINSENDA COPPER	6.75	315	2126.25	Oil	ICE	Diesel-Engines	Dry cooling	Air	Diesel	NA	688.904	482.233	25.7497	-10.7633	Diesel engines for the Copper mine
14035	CONGO DEMOCRATIC REPUBLIC	KINSHASA (ENRA)	0.6	315	189	Oil	ICE	Diesel-Engines	Dry cooling	Air	Diesel	NA	61.236	42.8652	15.3215	-4.32459	By the size and fuel, it must be a small MCI generator
14036	CONGO DEMOCRATIC REPUBLIC	KINSHASA (SNEL)	2.6	315	819	Oil	ICE	Diesel-Engines	Dry cooling	Air	Diesel	NA	265.356	185.749	15.3215	-4.32459	This is the airport, likely a diesel generator for the backup of this airport
14037	CONGO DEMOCRATIC REPUBLIC	KISANGANI PLANT	0.15	315	47.25	Oil	ICE	Diesel-Engines	Dry cooling	Air	Diesel	NA	15.309	10.7163	25.2	0.516667	By the size and fuel, it must be a small MCI generator
14038	CONGO DEMOCRATIC REPUBLIC	KODA	0.382	3626.7	1385.4	Hydropower	ROR	NA	NA	NA	NA	NA	0	0	30.8833	2.08333	ROR (very small)
14039	CONGO DEMOCRATIC REPUBLIC	KONGOLO	0.2	315	63	Oil	ICE	Diesel-Engines	Dry cooling	Air	Diesel	NA	20.412	14.2884	27.4794	-11.6609	By the size and fuel, it must be a small MCI generator
14040	CONGO DEMOCRATIC REPUBLIC	KONI	26	3626.7	94294.2	Hydropower	ROR	NA	NA	NA	NA	NA	55713.3	55713.3	27.269	-10.719	ROR
14041	CONGO DEMOCRATIC REPUBLIC	LEMERA HOSPITAL	0.115	3626.7	417.07	Hydropower	ROR	NA	NA	NA	NA	NA	0	0	28.98	-3.035	ROR (very small)
14042	CONGO DEMOCRATIC REPUBLIC	LIBENGE (Libanga)	1.35	315	425.25	Oil	ICE	Diesel-Engines	Dry cooling	Air	Diesel	NA	137.781	96.4466	18.6795	0.333681	Libenge (Libanga) is a town along the river. Diesel generator for their electricity
14043	CONGO DEMOCRATIC REPUBLIC	LIOUESSO	19.2	3626.7	69632.6	Hydropower	Dammed	NA	NA	NA	NA	NA	0	0	15.6917	1.05278	reservoir.https://en.wikipedia.org/wiki/Liouesso_Hydroelectric_Power_Station
14044	CONGO DEMOCRATIC REPUBLIC	LISALA	0.2	315	63	Oil	ICE	Diesel-Engines	Dry cooling	Air	Diesel	NA	20.412	14.2884	21.5167	2.15	By the size and fuel, it must be a small MCI generator
14045	CONGO DEMOCRATIC REPUBLIC	LUBI RAPIDS	0.436	3626.7	1581.24	Hydropower	ROR	NA	NA	NA	NA	NA	0	0	23.4386	-5.29573	ROR (very small)
14046	CONGO DEMOCRATIC REPUBLIC	LUBUDI	1	3626.7	3626.7	Hydropower	ROR	NA	NA	NA	NA	NA	0	0	25.9697	-9.95645	ROR
14047	CONGO DEMOCRATIC REPUBLIC	LUBUMBASHI	1.25	315	393.75	Oil	ICE	Diesel-Engines	Dry cooling	Air	Diesel	NA	127.575	89.3024	27.4794	-11.6609	Location at the zoo. Assumed Diesel generator due to its size and fuel.
14048	CONGO DEMOCRATIC REPUBLIC	LUKULA	0.2	315	63	Oil	ICE	Diesel-Engines	Dry cooling	Air	Diesel	NA	20.412	14.2884	15.1731	-4.51056	By the size and fuel, it must be a small MCI generator
14049	CONGO DEMOCRATIC REPUBLIC	MBANDAKA	2.65	315	834.75	Oil	ICE	Diesel-Engines	Dry cooling	Air	Diesel	NA	270.459	189.321	18.2667	0.0666667	Very likely a small group of diesel engines for backup of the region
14050	CONGO DEMOCRATIC REPUBLIC	MBUJI MAYI	0.8	315	252	Oil	ICE	Diesel-Engines	Dry cooling	Air	Diesel	NA	81.6479	57.1536	23.6	-6.15	By the size and fuel, it must be a small MCI generator
14051	CONGO DEMOCRATIC REPUBLIC	MOANDA (SNEL)	0.8	315	252	Oil	ICE	Diesel-Engines	Dry cooling	Air	Diesel	NA	81.6479	57.1536	12.4203	-5.96869	By the size and fuel, it must be a small MCI generator
14052	CONGO DEMOCRATIC REPUBLIC	MOBAYI	22	3626.7	79787.4	Hydropower	Dammed	NA	NA	NA	NA	NA	0	0	21.18	4.3	Reservoir
14053	CONGO DEMOCRATIC REPUBLIC	MOGA	0.4	3626.7	1450.68	Hydropower	ROR	NA	NA	NA	NA	NA	0	0	26.2895	-2.71493	ROR (very small)
14054	CONGO DEMOCRATIC REPUBLIC	MONDO GIUSTO	0.72	3626.7	2611.22	Hydropower	ROR	NA	NA	NA	NA	NA	0	0	29.4528	0.499012	ROR (very small)
14055	CONGO DEMOCRATIC REPUBLIC	MUSOSHI	2	315	630	Oil	ICE	Diesel-Engines	Dry cooling	Air	Diesel	NA	204.12	142.884	27.6444	-12.2464	Location is near Zambia. PP not found, very small village. I assume is diesel engine
14056	CONGO DEMOCRATIC REPUBLIC	MUTWANGA	9.4	3626.7	34091	Hydropower	ROR	NA	NA	NA	NA	NA	949.341	949.341	29.7484	0.337703	ROR
14057	CONGO DEMOCRATIC REPUBLIC	MWADINGUSHA	71	3626.7	257496	Hydropower	Dammed	NA	NA	NA	NA	NA	3.43853e+08	3.43853e+08	27.2447	-10.7452	Reservoir
14058	CONGO DEMOCRATIC REPUBLIC	N'SEKE	186.3	3626.7	675654	Hydropower	Dammed	NA	NA	NA	NA	NA	3.71936e+06	3.71936e+06	25.4277	-10.3253	ROR Worldbank: Installed 260, operational 186,3
14059	CONGO DEMOCRATIC REPUBLIC	N'ZILO	100	3626.7	362670	Hydropower	Dammed	NA	NA	NA	NA	NA	0	0	25.4667	-10.5	ROR
14060	CONGO DEMOCRATIC REPUBLIC	N'ZORO	1	3626.7	3626.7	Hydropower	ROR	NA	NA	NA	NA	NA	0	0	29.5355	3.03716	ROR (very small)
14061	CONGO DEMOCRATIC REPUBLIC	NZORO II (KIBALI GOLD MINES)	22	3626.7	79787.4	Hydropower	ROR	NA	NA	NA	NA	NA	0	0	23.6	-6.15	ROR
14062	CONGO DEMOCRATIC REPUBLIC	OSO	0.171	3626.7	620.166	Hydropower	ROR	NA	NA	NA	NA	NA	0	0	27.3667	-1.15	ROR (very small)
14063	CONGO DEMOCRATIC REPUBLIC	RUTSHURU	13.8	3626.7	50048.5	Hydropower	ROR	NA	NA	NA	NA	NA	49052.2	49052.2	29.447	-1.18557	ROR
14064	CONGO DEMOCRATIC REPUBLIC	RUZIZI-I	13	3626.7	47147.1	Hydropower	Dammed	NA	NA	NA	NA	NA	289681	289681	28.8752	-2.5092	Reservoir
14065	CONGO DEMOCRATIC REPUBLIC	RUZIZI-II	32	3626.7	116054	Hydropower	ROR	NA	NA	NA	NA	NA	692611	692611	28.8752	-2.5092	Reservoir
14066	CONGO DEMOCRATIC REPUBLIC	SANGA	11	3626.7	39893.7	Hydropower	ROR	NA	NA	NA	NA	NA	49031.9	49031.9	15.4308	-4.66833	ROR, expanded with 5.76 MW in 2017. https://www.openstreetmap.org/way/848901558
14067	CONGO DEMOCRATIC REPUBLIC	TSHALA (Lubilanji II)	1.75	2652.7	4642.22	Hydropower	ROR	NA	NA	NA	NA	NA	0	0	23.6	-6.15	Worldbank
14068	CONGO DEMOCRATIC REPUBLIC	TSHELA	0.4	315	126	Oil	ICE	Diesel-Engines	Dry cooling	Air	Diesel	NA	40.824	28.5768	12.9608	-5.00777	By the size and fuel, it must be a small MCI generator
14069	CONGO DEMOCRATIC REPUBLIC	TSHIIKAPA	0.78	3626.7	2828.83	Hydropower	ROR	NA	NA	NA	NA	NA	0	0	20.8667	-6.5	ROR (very small)
14070	CONGO DEMOCRATIC REPUBLIC	TSHOPO	19.5	3626.7	70720.6	Hydropower	ROR	NA	NA	NA	NA	NA	0	0	25.19	0.53	ROR
14071	CONGO DEMOCRATIC REPUBLIC	Tubi Tubidi	12	3626.7	43520.4	Hydropower	Dammed	NA	NA	NA	NA	NA	2.92578e+06	2.92578e+06	25.6579	-7.37838	Near lake Boya
14072	CONGO DEMOCRATIC REPUBLIC	UNIBRA KINSHASA	0.2	315	63	Oil	ICE	Diesel-Engines	Dry cooling	Air	Diesel	NA	20.412	14.2884	15.3215	-4.32459	By the size and fuel, it must be a small MCI generator
14073	CONGO DEMOCRATIC REPUBLIC	VIRUNGA RWENZORI	0.4	3626.7	1450.68	Hydropower	ROR	NA	NA	NA	NA	NA	0	0	29.7484	0.337703	ROR (very small)
14074	CONGO DEMOCRATIC REPUBLIC	ZONGO TOWN	0.1	315	31.5	Oil	ICE	Diesel-Engines	Dry cooling	Air	Diesel	NA	10.206	7.14419	18.5997	4.33975	By the size and fuel, it must be a small MCI generator
14075	CONGO DEMOCRATIC REPUBLIC	ZONGO-I	75	3626.7	272002	Hydropower	ROR	NA	NA	NA	NA	NA	189400	189400	14.9025	-4.78	ROR
14076	CONGO DEMOCRATIC REPUBLIC	ZONGO-II	150	3626.7	544005	Hydropower	ROR	NA	NA	NA	NA	NA	120168	120168	13.9144	-5.23657	ROR
15001	COTE D'IVOIRE	AYAMÉ 1	30	2531.6	75948	Hydropower	Dammed	NA	NA	NA	NA	NA	897496	897496	-5.3612	3.1012	Reservoir. https://fr.wikipedia.org/wiki/Liste_des_centrales_%C3%A9lectriques_en_C%C3%B4te_d%27Ivoire
15002	COTE D'IVOIRE	AYAMÉ 2	22	2623.7	57721.4	Hydropower	Dammed	NA	NA	NA	NA	NA	705327	705327	-5.3455	3.0932	Reservoir. https://fr.wikipedia.org/wiki/Liste_des_centrales_%C3%A9lectriques_en_C%C3%B4te_d%27Ivoire
15003	COTE D'IVOIRE	AZITO	450	6685	3008250	NG	Combined	Combined Cycle (CC)	Dry cooling	Air	Natural Gas, HFO	NA	113875	79712.3	-4.07606	5.30157	Coast. Combined cycle. Air cooling, just the need to make up water. https://www.gem.wiki/Azito_power_plant
15004	COTE D'IVOIRE	BUYO	165	2623.7	432910	Hydropower	Dammed	NA	NA	NA	NA	NA	1.25043e+08	1.25043e+08	-7.04497	6.24155	Reservoir
15005	COTE D'IVOIRE	FAYE/GRAH	5	2531.6	12658	Hydropower	Dammed	NA	NA	NA	NA	NA	346060	346060	-6.61667	4.73333	ROR
15006	COTE D'IVOIRE	KOSSOU	176	2531.6	445562	Hydropower	Dammed	NA	NA	NA	NA	NA	197653158	197653158	-5.4727	7.0301	Reservoir
15007	COTE D'IVOIRE	SIR REFINERY	48	6685	320880	NG	ICE	Gas-Engines	Dry cooling	Air	Natural Gas, HFO	NA	103965	72775.5	-3.99226	5.25851	Group of movable diesel engines working at the site of the refinery
15008	COTE D'IVOIRE	SOUBRE	275	2531.6	696190	Hydropower	Dammed	NA	NA	NA	NA	NA	1.04805e+07	1.04805e+07	-6.65591	5.80272	Reservoir
15009	COTE D'IVOIRE	SUCRIVOIRE PLANT	7.5	333.33	2499.97	Biomass	Rankine	Steam Turbine	No cooling	NA	Sugarcane	NA	405.576	283.903	-5.54997	7.55053	Siemens Energy cogeneration SST-300 steam turbine. There is no wet tower. https://www.siemens-energy.com/africa/en/company/francophone-africa/sucrivoire.html
15010	COTE D'IVOIRE	TAABO	210	2531.6	531636	Hydropower	Dammed	NA	NA	NA	NA	NA	1.31669e+07	1.31669e+07	-5.0833	6.2167	Reservoir
15011	COTE D'IVOIRE	VRIDI	321	6738.3	2.16299e+06	NG	Combined	Combined Cycle (CC)	Dry cooling	Air	Natural Gas	NA	81878.2	57314.8	-3.97972	5.25917	Brayton, air cooling. I assume is Natural Gas
15012	COTE D'IVOIRE	VRIDI AGGREKO	200	351	70200	Oil	ICE	Diesel-Engines	Dry cooling	Air	HFO	NA	22744.8	15921.3	-4.00675	5.25948	ICE engines https://www.aggreko.com/en-asia/case-studies/utilities/emergency-power-for-ivory-coast https://www.gem.wiki/Agrekko_Vridi_power_station
15013	COTE D'IVOIRE	VRIDI CIPREL	111	6685	742035	NG	Brayton	Gas Turbine	No cooling	NA	Natural Gas, HFO	NA	1.19379e+06	955029	-4.00971	5.26156	Ciprel Power plant. Unit GT8 is only Gas turbine. https://www.gem.wiki/Ciprel_power_station
15014	COTE D'IVOIRE	VRIDI CIPREL	225	6685	1504125	NG	Combined	Combined Cycle (CC)	Dry cooling	Air	Natural Gas, HFO	NA	56937.3	39856.1	-4.02806	5.34111	Ciprel Power plant. Units GT9 and GT10 are combined cycles with dry cooling. https://www.gem.wiki/Ciprel_power_station
18001	DJIBOUTI	ABNOUB-EL FATH WWTP	2.612	6240	16298.9	Oil	ICE	Diesel-Engines	Dry cooling	Air	Diesel	NA	5280.83	3696.58	43.174	11.5237	Diesel generator in the small wastewater treatment plant
18002	DJIBOUTI	ALI ADDE	0.06	1500	90	Sun	PV	Land	No cooling	NA	Flat	BWh - Desert Hot	8.85786	6.2005	42.8876	11.1287	Desert.
18003	DJIBOUTI	ALI SABIEH	0.8	6240	4992	Oil	ICE	Diesel-Engines	Dry cooling	Air	Diesel	NA	1617.41	1132.18	42.7125	11.1558	By the size and fuel, it must be a small MCI generator
18004	DJIBOUTI	BOULAOS	34.15	6240	213096	Oil	Rankine	Steam Turbine	Wet tower	Freshwater	Diesel	BWh - Desert Hot	967987	887322	43.1569	11.5759	Boulaos power plant is divided into two. One parte ICE engines and One Rankine //efaidnbmnnnibpcajpcglclefindmkaj/https://www.esmap.org/sites/esmap.org/files/TR_DJIBOUTIDraft.pdf
18005	DJIBOUTI	BOULAOS	34.15	6240	213096	Oil	ICE	Diesel-Engines	Dry cooling	Air	Diesel	NA	69043	48330.1	43.1569	11.5759	Boulaos power plant is divided into two. One parte ICE engines and One Rankine //efaidnbmnnnibpcajpcglclefindmkaj/https://www.esmap.org/sites/esmap.org/files/TR_DJIBOUTIDraft.pdf
18006	DJIBOUTI	DIKHIL	0.8	6240	4992	Oil	ICE	Diesel-Engines	Dry cooling	Air	Diesel	NA	1617.41	1132.18	42.3739	11.1086	By the size and fuel, it must be a small MCI generator
18007	DJIBOUTI	MARABOUT	13.8	6240	86112	Oil	ICE	Diesel-Engines	Dry cooling	Air	Diesel	NA	27900.3	19530.2	43.1501	11.6218	Location not found. Coast. working installed capacity is lower than installed. Assumed an ICE with diesel engines
18008	DJIBOUTI	OBOCK	0.9	6240	5616	Oil	ICE	Diesel-Engines	Dry cooling	Air	Diesel	NA	1819.58	1273.71	43.2906	11.9631	By the size and fuel, it must be a small MCI generator
18009	DJIBOUTI	TADJOURAH	13	6240	81120	Oil	ICE	Diesel-Engines	Dry cooling	Air	Diesel	NA	26282.9	18398	42.8844	11.7853	Cannot find it and there is no indication near the village of Tadjourah that there is other type of power plant. Assumed a group of diesel engines Installed capacity is an assumption Total in Djibouti is 100 MW https://www.tresor.economie.gouv.fr/Pays/DJ/energie-une-forte-dependance-aux-importations-d-electricite
17001	EGYPT	ABU KORKAS SUGAR	6	4644.8	27868.8	Biomass	Rankine	Steam Turbine	No cooling	NA	Sugarcane	NA	4521.21	3164.85	30.8384	27.9312	Along Nile, sugar plant. No need of cooling
17002	EGYPT	ABU MADI WORKS	9	4951	44559	NG	ICE	Gas-Engines	Dry cooling	Air	Natural Gas	NA	14437.1	10106	31.1754	31.3464	I cannot find it, the location is near the estimated place for the Abu Madi gas and oil field, but there is no indication of a 9 MW power plant
17003	EGYPT	ABU QIR	911	4951	4510361	NG	Rankine	Steam Turbine	Once through	Saline	Natural Gas, HFO	NA	170736	113661	30.1403	31.2692	Once through. Coast. Steam turbines from 2012 and 13. https://www.power-technology.com/marketdata/new-abu-qir-power-plant-egypt/ https://www.gem.wiki/Abu_Qir_power_plant
17004	EGYPT	ABU QIR QALAA	1300	4951	6436300	NG	Rankine	Steam Turbine	Once through	Saline	Natural Gas, HFO	NA	243640	162195	30.1449	31.2687	Rankine. Coast. https://www.gem.wiki/New_Abu_Qir_power_plant
17005	EGYPT	ABU QIR WORKS	1300	4386	5701800	Oil	Rankine	Steam Turbine	Once through	Saline	Natural Gas	NA	925014	615794	30.1421	31.2694	Coast. Steam turbines from 2012 and 2013. https://www.gem.wiki/New_Abu_Qir_power_plant
17006	EGYPT	ABU RAWASH WWTP	3.564	4386	15631.7	Oil	ICE	Diesel-Engines	Dry cooling	Air	Diesel	NA	5064.67	3545.27	31.0765	30.0628	Group of diesel engines for the Waste water treatment plant
17007	EGYPT	ABU RUDEIS FIELD	31.5	4951	155956	NG	Brayton	Gas Turbine	No cooling	NA	Natural Gas, HFO	NA	250903	200722	33.1875	28.9036	Two small units near the suez oil company
17008	EGYPT	ABU RUDEIS FIELD	10.5	4386	46053	Oil	ICE	Diesel-Engines	Dry cooling	Air	Diesel	NA	14921.2	10444.8	33.1823	28.9605	Counterparts of the gas turbines of the rudeis field, but running with diesel
17009	EGYPT	ABU SIMBEL WWTP	0.39	4386	1710.54	Oil	ICE	Diesel-Engines	Dry cooling	Air	Diesel	NA	554.215	387.95	33.7061	27.3166	By the size and fuel, it must be a small MCI generator
17010	EGYPT	ABU SIMBUL	1.8	4386	7894.8	Oil	ICE	Diesel-Engines	Dry cooling	Air	Diesel	NA	2557.91	1790.54	31.6162	22.3457	By its size and fuel I assume it is an ICE with diesel
17011	EGYPT	ABU SULTAN	600	4951	2970600	NG	Rankine	Steam Turbine	Once through	Saline	Natural Gas	NA	112449	74859.1	32.3085	30.4021	Coast. https://www.gem.wiki/Abu_Sultan_power_plant
17012	EGYPT	AGIBA RAML	2.4	4951	11882.4	NG	ICE	Gas-Engines	Dry cooling	Air	Natural Gas	NA	3849.89	2694.93	27.8335	30.0223	ICE with natural gas in the RAML field
17013	EGYPT	AHRAM FACTORY	8.4	4386	36842.4	Oil	ICE	Diesel-Engines	Dry cooling	Air	Diesel	NA	11936.9	8355.85	31.2505	30.1251	I cannot find it, but likely a group of diesel engines for the factory Near Nile
17014	EGYPT	AIN SOKHNA	1300	4951	6436300	NG	Rankine	Steam Turbine	Once through	Saline	Natural Gas, HFO	NA	243640	162195	32.3546	29.6211	Super critical thermal power. Two Rankine units with Once trough cooling. Coast next to the suez canal. https://www.gem.wiki/Ain_Sokhna_power_plant
17015	EGYPT	AL SINDIAN MILL	14.3	4951	70799.3	NG	ICE	Gas-Engines	Dry cooling	Air	Natural Gas	NA	22939	16057.3	30.8829	29.9428	ICE engines for the paper mill.
17016	EGYPT	AL-ARISH (Mahata - Steam)	66	4386	289476	Oil	Rankine	Steam Turbine	Once through	Saline	HFO	NA	46962.3	31263.4	33.6827	31.1157	Rankine, once through. Coast
17017	EGYPT	ALEXANDRIA FLOOD	2.5	4386	10965	Oil	ICE	Diesel-Engines	Dry cooling	Air	Diesel	NA	3552.66	2486.86	29.9	31.2	By its size and fuel I assume it is an ICE with diesel
17018	EGYPT	ALEXANDRIA I&S	4	4386	17544	Oil	ICE	Diesel-Engines	Dry cooling	Air	Diesel	NA	5684.25	3978.98	29.9	31.2	I cannot find, but considering its size, fuel and the name of the power plant it is very likely that is a group of diesel engines for a factory near alexandria.
17019	EGYPT	ALEXANDRIA WATER WORKS	5.6	4386	24561.6	Oil	ICE	Diesel-Engines	Dry cooling	Air	Diesel	NA	7957.95	5570.57	29.9212	31.2019	I cannot find it. Likely a group of diesel engines for the water plant in Alexandria
17020	EGYPT	APR ETHYDCO	150	4951	742650	NG	Brayton	Gas Turbine	No cooling	NA	Natural Gas, HFO	NA	1.19478e+06	955820	29.8351	31.0179	Near the etylene plant. Three units of gas turbines. https://www.gem.wiki/Ethydco_power_station
17021	EGYPT	ARAB STEEL WORKS	50	4386	219300	Oil	ICE	Diesel-Engines	Dry cooling	Air	Diesel	NA	71053.1	49737.2	31.25	30.05	Diesel generators for the arabian steel plant
17022	EGYPT	ASWAN	592	4751.3	2.81277e+06	Hydropower	Dammed	NA	NA	NA	NA	NA	1.51356e+06	1.51356e+06	32.8989	24.0875	reservoir
17023	EGYPT	ASWAN HIGH DAM	2100	4751.3	9977730	Hydropower	Dammed	NA	NA	NA	NA	NA	1.86635e+08	1.86635e+08	32.8989	24.0875	reservoir
17024	EGYPT	ASYUT (Walidia)	600	4951	2970600	NG	Rankine	Steam Turbine	Once through	Freshwater	Natural Gas, HFO, Diesel	BWh - Desert Hot	3.93573e+08	2.13654e+06	31.1833	27.1833	Two steam turbine units operational before 2020. Once through with water from the Nile. It indicates that its main fuel is NG, but it can use Diesel. https://www.gem.wiki/Walidia_power_station https://www.power-technology.com/data-insights/power-plant-profile-assiut-walidia-thermal-power-station-egypt/?cf-view The other Walidia power plant (3499 and 3500) has been defined that started in 2021 htt…
17025	EGYPT	ASYUT REFINERY	9	4386	39474	Oil	ICE	Diesel-Engines	Dry cooling	Air	HFO	NA	12789.6	8952.7	30.9923	27.1964	Part of the refinery
17026	EGYPT	ASYUT WORKS	4.835	4386	21206.3	Oil	ICE	Diesel-Engines	Dry cooling	Air	HFO	NA	6870.84	4809.59	31.1837	27.181	Considering its close to the refinery, it must be HFO
17027	EGYPT	ATAKA	640	4951	3168640	NG	Brayton	Gas Turbine	No cooling	NA	Natural Gas, HFO	NA	5.09771e+06	4.07817e+06	32.4723	29.9362	Four units of Gas turbines. https://www.gem.wiki/Ataka_power_plant
17028	EGYPT	AYOUN MOUSSA (Oyoun Moussa)	640	4951	3168640	NG	Rankine	Steam Turbine	Once through	Saline	Natural Gas, HFO, Diesel	NA	119946	79849.7	32.5949	29.9118	Steam turbine,. Coast. https://www.gem.wiki/Oyoun_Mousa_Gas_power_plant
17029	EGYPT	BALAKS WWTP	14.9	4386	65351.4	Oil	ICE	Diesel-Engines	Dry cooling	Air	Diesel	NA	21173.8	14821.7	31.2167	30.0333	A group of diesel engines for the Waste water treatment plant. Near Nile
17030	EGYPT	BANHA	750	4951	3713250	NG	Combined	Combined Cycle (CC)	Once through	Freshwater	Natural Gas, HFO	BWh - Desert Hot	2.81124e+08	1.54618e+06	31.2234	30.4974	Two units of Combined cycle. Once through with water from a Canal from Nile. https://www.gem.wiki/Banha_power_plant
17031	EGYPT	BENBAN BEA	1650	1538	2537700	Sun	PV	land	No cooling	NA	Flat	BWh - Desert Hot	249762	174834	32.7225	24.4324	Desert. https://en.wikipedia.org/wiki/Benban_Solar_Park
17032	EGYPT	BENI SUEF	4800	4951	23764800	NG	Combined	Combined Cycle (CC)	Wet Tower	Freshwater	Natural Gas	BWh - Desert Hot	6.83693e+07	2.42891e+07	31.0064	28.9208	Combined cycle. Water from Nile. https://www.gem.wiki/Beni_Suef_power_plant
17033	EGYPT	BORG EL ARAB PLANT (Ahraba)	6.6	4951	32676.6	NG	ICE	Gas-Engines	Dry cooling	Air	Natural Gas	NA	10587.2	7411.05	29.6155	30.8702	Rack of cooling fans. The description of the satellite indicates 6 units of gas engines
17034	EGYPT	CAIRO 6 OCTOBER	600	4951	2970600	NG	Brayton	Gas Turbine	No cooling	NA	Natural Gas, Diesel	NA	4.7791e+06	3.82328e+06	31.0456	30.054	Four units of gas turbines. Near Nile. https://www.gem.wiki/6_October_power_plant
17035	EGYPT	CAIRO 6 OCTOBER	919	4951	4549969	NG	Combined	Combined Cycle (CC)	Dry cooling	Air	Natural Gas, Diesel	NA	172235	120565	31.0456	30.054	Four units of combined cycle with one large dry cooling tower (919MW from 2019). https://www.gem.wiki/6_October_power_plant
17036	EGYPT	CAIRO ADMIN CITY (New Capital)	4800	4951	23764800	NG	Combined	Combined Cycle (CC)	Dry cooling	Air	Natural Gas	NA	899596	629717	31.7533	29.9094	Four sets of two units of combined cycle. Air cooling, four units. https://www.gem.wiki/New_Capital_power_station https://www.presidency.eg/en/%D8%A7%D9%84%D9%85%D8%B4%D8%A7%D8%B1%D9%8A%D8%B9-%D8%A7%D9%84%D9%82%D9%88%D9%85%D9%8A%D8%A9/%D9%85%D8%AD%D8%B7%D8%A9-%D9%83%D9%87%D8%B1%D8%A8%D8%A7%D8%A1-%D8%A7%D9%84%D8%B9%D8%A7%D8%B5%D9%85%D8%A9-%D8%A7%D9%84%D8%A5%D8%AF%D8%A7%D8%B1%D9%8A%D8%A9-%D8%A7%D9%…
17037	EGYPT	CAIRO INTL AIRPORT	2.4	4386	10526.4	Oil	ICE	Diesel-Engines	Dry cooling	Air	Diesel	NA	3410.55	2387.39	31.3792	30.1088	Backup generators for the Airport
17038	EGYPT	CAIRO NORTH	1500	4951	7426500	NG	Combined	Combined Cycle (CC)	Once through	Freshwater	Natural Gas, HFO	BWh - Desert Hot	5.62247e+08	3.09236e+06	31.2674	30.1095	Two sets of two units of combined cycle. Once through with water from the Nile. https://www.gem.wiki/Cairo_North_power_plant
17039	EGYPT	CAIRO SOUTH	165	4951	816915	NG	Combined	Combined Cycle (CC)	Once through	Freshwater	Natural Gas, HFO	BWh - Desert Hot	6.18472e+07	340160	31.25	30.05	Part of the Cairo South Complex. One unit of combined cycle. Coast. Out of operation in 2021 and 2022. https://www.gem.wiki/Cairo_South_power_plant
17040	EGYPT	CAIRO SOUTH	330	4951	1633830	NG	Brayton	Gas Turbine	No cooling	NA	Natural Gas, HFO	NA	2.62851e+06	2.1028e+06	31.25	30.05	Part of the Cairo South Complex. Two units of Gas turbines. Coast. Out of operation in 2021 and 2022. https://www.gem.wiki/Cairo_South_power_plant
17041	EGYPT	CAIRO WEST (Cairo West Extension)	1360	4951	6733360	NG	Rankine	Steam Turbine	Once through	Freshwater	Natural Gas, HFO, Diesel	BWh - Desert Hot	8.92099e+08	4.84282e+06	31.1666	30.1384	Four units of combined cycle. Once through cooling. Water through canal from Nile. One unit included since 2021 (not counted here). https://www.gem.wiki/Cairo_West_Extension_power_plant
17042	EGYPT	CAIRO WWTP	12.8	4386	56140.8	Oil	ICE	Diesel-Engines	Dry cooling	Air	Diesel	NA	18189.6	12732.7	31.18	30.0339	Waste water treatment plant. Near Nile
17043	EGYPT	DAHAB	10	4386	43860	Oil	ICE	Diesel-Engines	Dry cooling	Air	Diesel	NA	14210.6	9947.44	34.5134	28.501	Diesel engines, likely for the desalination plant
17044	EGYPT	DAMANHOUR	158	4951	782258	NG	Combined	Combined Cycle (CC)	Once through	Freshwater	Natural Gas, HFO	BWh - Desert Hot	5.92234e+07	325729	30.4304	31.0859	Combined cycle. Canal to Nile. https://www.gem.wiki/Damanhour_power_plant
17045	EGYPT	DAMIETTA	1500	4951	7426500	NG	Combined	Combined Cycle (CC)	Once through	Freshwater	Natural Gas, HFO	BWh - Desert Hot	5.62247e+08	3.09236e+06	31.7237	31.3812	Three sets of two Combined cycle units with once through cooling. Water from the Damietta Branch (Nile). https://www.gem.wiki/Damietta_power_plant
17046	EGYPT	DAMIETTA TERMINAL	124.85	4951	618132	NG	Brayton	Gas Turbine	No cooling	NA	Natural Gas, HFO	NA	994451	795561	31.7451	31.4693	Five gas turbine units in the LNG terminal
17047	EGYPT	DESHNA (QUS) FACTORY	20.3	4386	89035.8	Oil	ICE	Diesel-Engines	Dry cooling	Air	Diesel	NA	28847.6	20193.3	32.7446	25.9146	Group of diesel generators nside the factory
17048	EGYPT	DISOUQ GAS PLANT	4	4386	17544	Oil	ICE	Diesel-Engines	Dry cooling	Air	Diesel	NA	5684.25	3978.98	31.0422	31.3078	Oil and gas field. Diesel generators
17049	EGYPT	ECC CEMENT PLANT	1.82	4386	7982.52	Oil	ICE	Diesel-Engines	Dry cooling	Air	Diesel	NA	2586.33	1810.43	32.3167	29.6002	Diesel generator for the cement plant
17050	EGYPT	EDFU SUGAR PLANT	12.6	4644.8	58524.5	Biomass	Rankine	Steam Turbine	No cooling	NA	Sugarcane	NA	9494.54	6646.18	32.8772	24.9792	Along Nile, sugar plant. No need of cooling
17051	EGYPT	EL AYAT WWTP	0.805	4386	3530.73	Oil	ICE	Diesel-Engines	Dry cooling	Air	Diesel	NA	1143.96	800.769	31.2131	30.0449	By the size and fuel, it must be a small MCI generator
17052	EGYPT	EL FIKRYA WWTP	0.675	4386	2960.55	Oil	ICE	Diesel-Engines	Dry cooling	Air	Diesel	NA	959.217	671.452	30.819	27.9339	By the size and fuel, it must be a small MCI generator
17053	EGYPT	EL KHARGA	7.2	4386	31579.2	Oil	ICE	Diesel-Engines	Dry cooling	Air	Diesel	NA	10231.7	7162.16	30.5234	25.4552	Diesel engines outside of the city
17054	EGYPT	EL QARA FIIELD	9	4951	44559	NG	ICE	Gas-Engines	Dry cooling	Air	Natural Gas	NA	14437.1	10106	30.8347	31.2076	El Qara is a location where there are fossil fuels, but also very developed for agriculture. I cannot find it, but likely is a group of diesel engines working with natural gas Location is Alexandria
17055	EGYPT	EL SADAT PAPER	8.22	4951	40697.2	NG	ICE	Gas-Engines	Dry cooling	Air	Natural Gas	NA	13185.9	9230.12	30.5308	30.3588	I cannot see any other indication of other type of power plant in the area near the factories. Likely a group of diesel engines for the factory
17056	EGYPT	EL TOR	5	4386	21930	Oil	ICE	Diesel-Engines	Dry cooling	Air	Diesel	NA	7105.31	4973.72	33.6189	28.2538	Group of diesel engines in three buildings
17057	EGYPT	EL-AMERIYA REFINERY	105	4951	519855	NG	Combined	Combined Cycle (CC)	Wet Tower	Freshwater	Natural Gas	BWh - Desert Hot	1.49558e+06	531324	29.8495	31.0021	Combined cycle, once through cooling, near canal. https://www.gem.wiki/El_Ameriya_Refinery_power_station
17058	EGYPT	EL-AMERYA FTZ (midelec)	105	4951	519855	NG	Brayton	Gas Turbine	No cooling	NA	Natural Gas, HFO	NA	836343	669074	29.9	31.2	Three brayton units
17059	EGYPT	EL-ATF	750	4951	3713250	NG	Combined	Combined Cycle (CC)	Once through	Freshwater	Natural Gas, HFO	BWh - Desert Hot	2.81124e+08	1.54618e+06	30.5291	31.1851	Combined Cycle, Gas turbine + heat recovery. Once throug cooling from water from the Nile. https://www.gem.wiki/El-Atf_power_plant
17060	EGYPT	EL-KOUSIR	1.8	4386	7894.8	Oil	ICE	Diesel-Engines	Dry cooling	Air	Diesel	NA	2557.91	1790.54	34.279	26.1088	By its size and fuel I assume it is an ICE with diesel
17061	EGYPT	EL-KUREIMAT	1254	4951	6208554	NG	Rankine	Steam Turbine	Once through	Freshwater	Natural Gas, HFO	BWh - Desert Hot	8.22568e+08	4.46537e+06	31.2232	29.2721	Once through cooling. Water from Nile. Combined cycle. https://www.gem.wiki/Kuriemat_power_station
17062	EGYPT	EL-KUREIMAT	1500	4951	7426500	NG	Combined	Combined Cycle (CC)	Once through	Freshwater	Natural Gas	BWh - Desert Hot	5.62247e+08	3.09236e+06	31.2232	29.2721	Once through cooling. Water from Nile. Combined cycle. https://www.gem.wiki/Kuriemat_power_station
17063	EGYPT	EL-KUREIMAT ISCC	130	4951	643630	NG	Combined	Combined Cycle (CC)	Wet Tower	Freshwater	Natural Gas	BWh - Desert Hot	1.85167e+06	657829	31.2486	29.2773	Combined with solar parabolic through. Total is 150 MW. https://www.gem.wiki/Kuriemat_ISCC_power_plant
17064	EGYPT	EL-KUREIMAT ISCC	20	1538	30760	Sun	CSP	PT	Wet Tower	Freshwater	NA	BWh - Desert Hot	316049	221235	31.2486	29.2773	Solar parabolic through. Combined with gas plant. Total is 150 MW. Near Nile. Cooling tower
17065	EGYPT	EL-MAHMOUDIA	336	4951	1663536	NG	Brayton	Gas Turbine	No cooling	NA	Natural Gas, HFO	NA	2.6763e+06	2.14104e+06	30.5293	31.1744	Two gas turbines next to a canal from the nile. https://www.gem.wiki/New_Mahmoudia_Gas_power_plant
17066	EGYPT	EL-NUBARIA	2250	4951	11139750	NG	Combined	Combined Cycle (CC)	Once through	Freshwater	Natural Gas, HFO	BWh - Desert Hot	8.43371e+08	4.63854e+06	30.6671	30.6993	Combined cycle. Once through cooling. Water through canal from Nile. https://www.gem.wiki/Nubaria_power_plant
17067	EGYPT	EL-SALLOUM	2.4	4386	10526.4	Oil	ICE	Diesel-Engines	Dry cooling	Air	Diesel	NA	3410.55	2387.39	25.1541	31.5725	By its size and fuel I assume it is an ICE with diesel
17068	EGYPT	EL-SHABAB	1500	4951	7426500	NG	Combined	Combined Cycle (CC)	Dry cooling	Air	Natural Gas, HFO	NA	281124	196787	31.9234	30.4653	Two sets of four units of combined cycle. Each set with a dry cooling tower. https://www.gem.wiki/El-Shabab_power_station
17069	EGYPT	EL-SIUF	199.8	4951	989210	NG	Brayton	Gas Turbine	No cooling	NA	Natural Gas, HFO	NA	1.59144e+06	1.27315e+06	29.7623	31.0277	Steam turbine. Once trough. Canal to Nile.
17070	EGYPT	EL-TEBBIN (Tibeen, Al-Tebbin)	700	4951	3465700	NG	Rankine	Steam Turbine	Once through	Freshwater	Natural Gas, HFO	BWh - Desert Hot	4.59169e+08	2.49263e+06	31.2982	29.7755	Two large units of Steam turbine. Once through with water from the Nile. https://www.gem.wiki/El-Tebeen_power_plant
17071	EGYPT	ESNA	85.68	4751.3	407091	Hydropower	Dammed	NA	NA	NA	NA	NA	0	0	32.65	25.6833	ROR
17072	EGYPT	FAIYUN	0.8	4751.3	3801.04	Hydropower	ROR	NA	NA	NA	NA	NA	0	0	30.8144	29.5389	ROR
17073	EGYPT	FAIYUN EMISAL	1.8	4386	7894.8	Oil	ICE	Diesel-Engines	Dry cooling	Air	Diesel	NA	2557.91	1790.54	30.7062	29.4503	Diesel generators near the EMISAL factory.
17074	EGYPT	GABAR EL ASFAR	24	4386	105264	Oil	ICE	Diesel-Engines	Dry cooling	Air	Diesel	NA	34105.5	23873.9	31.3887	30.1956	Group of diesel engines for the Waste water treatment plant
17075	EGYPT	GABEL EL-ZEIT (Gulf El-Zayt)	580	41.9	24302	Wind	Wind turbine	Onshore	No cooling	NA	NA	NA	0.00321976	0.00321976	33.1809	28.1236	Wind Farm formed by three phases (El-Zayt I - 240 MW, II - 220 MW, III - 120 MW). https://www.gem.wiki/Gulf_Of_Ziet_Wind_Complex
17076	EGYPT	GAMASA SOLAR	1	1538	1538	Sun	PV	Land	No cooling	NA	Flat	BWh - Desert Hot	151.371	105.96	31.4779	31.4497	Desert. start 2017
17077	EGYPT	GIZA NORTH	2250	4951	11139750	NG	Combined	Combined Cycle (CC)	Once through	Freshwater	Natural Gas, HFO	BWh - Desert Hot	8.43371e+08	4.63854e+06	30.9471	30.2483	Combined cycle. Once through cooling. Water through canal from Nile. https://www.gem.wiki/North_Giza_power_plant
17078	EGYPT	GIZA PLANT	2250	4951	11139750	NG	Combined	Combined Cycle (CC)	Dry cooling	Air	Natural Gas, HFO	NA	421685	295180	31.0442	30.0579	Combined cycle. Next to 6 of october plant
17079	EGYPT	GUIRGA MILL	10	4386	43860	Oil	Rankine	Steam Turbine	Once through	Freshwater	HFO	BWh - Desert Hot	8.30141e+06	49808.4	31.8874	26.3533	Sugar plant. Once through. Near Nile
17080	EGYPT	HAWAMDIA FACTORY	16	4644.8	74316.8	Biomass	Rankine	Steam Turbine	No cooling	NA	Sugarcane	NA	12056.6	8439.59	31.25	29.9	Along Nile, sugar plant. No need of cooling
17081	EGYPT	HELWAN	121	4386	530706	Oil	ICE	Diesel-Engines	Dry cooling	Air	Diesel	NA	171949	120364	31.3333	29.85	I cannot find it. Probably an old power plant that has been decomissioned as the newer and larger ones are introduced into the grid. I asume that they are diesel engines
17082	EGYPT	HELWAN SEMADCO	3.2	4386	14035.2	Oil	ICE	Diesel-Engines	Dry cooling	Air	Diesel	NA	4547.4	3183.18	31.3107	29.8255	Diesel engines for the Cement plant
17083	EGYPT	HURGHADA	140.1	4951	693635	NG	Brayton	Gas Turbine	No cooling	NA	Natural Gas, HFO	NA	1.11592e+06	892736	33.8178	27.1488	Six gas turbine units.
17084	EGYPT	HURGHADA WIND I	262	41.9	10977.8	Wind	Wind turbine	Onshore	No cooling	NA	NA	NA	0.00145444	0.00145444	33.8129	27.2574	Ready in 2019. https://www.power-technology.com/marketdata/power-plant-profile-hurghada-wind-farm-i-egypt/
17085	EGYPT	IDKU TERMINAL	68	4951	336668	NG	Brayton	Gas Turbine	No cooling	NA	Natural Gas, HFO	NA	541631	433305	30.3212	31.3508	Small brayton turbines for the LNG station in Idku
17086	EGYPT	ISMAILIA	20	4386	87720	Oil	ICE	Diesel-Engines	Dry cooling	Air	Diesel	NA	28421.3	19894.9	32.2625	30.5828	I cannot find it. Probably it has moved since the introduction of larger plants nearby, or it is a group of diesel generators in the desalination plant
17087	EGYPT	KAFR EL ZAYAT WORKS	8.085	4386	35460.8	Oil	ICE	Diesel-Engines	Dry cooling	Air	Diesel	NA	11489.3	8042.51	30.8079	30.8305	Group of diesel engines in the factory Near Nile
17088	EGYPT	KARMOUZ	23.05	4386	101097	Oil	ICE	Diesel-Engines	Dry cooling	Air	Diesel	NA	32755.5	22928.8	29.9142	31.176	Diesel engines near the substation and transformation grid. Near salt lake with connection to sea
17089	EGYPT	KIRIAZI FACTORY	12	4386	52632	Oil	ICE	Diesel-Engines	Dry cooling	Air	Diesel	NA	17052.8	11936.9	31.4702	30.2713	Likely diesel engines for the industrial and factory complex
17090	EGYPT	LAKE BURULLUS	4800	4951	23764800	NG	Combined	Combined Cycle (CC)	Wet Tower	Freshwater	Natural Gas	BWh - Desert Hot	6.83693e+07	2.42891e+07	30.8073	31.5303	Water from Lake Burullus. Four sets of two units, four cooling towers. https://www.gem.wiki/Burullus_power_plant
17091	EGYPT	LUXOR SOLAR	2	1538	3076	Sun	PV	Land	No cooling	NA	Flat	BWh - Desert Hot	302.742	211.919	32.6396	25.6872	Desert. I cannot find it. I assume its land by its size and location
17092	EGYPT	MAGHARA	8.8	4386	38596.8	Oil	ICE	Diesel-Engines	Dry cooling	Air	Diesel	NA	12505.4	8753.75	34.0233	30.8949	Coal mine. No water, desert. Air cooling?
17093	EGYPT	MARSA ALAM	30	4386	131580	Oil	ICE	Diesel-Engines	Dry cooling	Air	Diesel	NA	42631.9	29842.3	34.879	25.0676	By size and observed infrastructure, I assume is MCI with diesel
17094	EGYPT	MASDAR ABU MINQAR	0.5	1538	769	Sun	PV	Land	No cooling	NA	Flat	BWh - Desert Hot	75.6855	52.9799	27.6514	26.4986	Desert.
17095	EGYPT	MASDAR ABU RAMAD	2	1538	3076	Sun	PV	Land	No cooling	NA	Flat	BWh - Desert Hot	302.742	211.919	36.4088	22.4043	Desert. Located in Abu Ramad. PV panels Masdar
17096	EGYPT	MASDAR AL-FARAFRA	5	1538	7690	Sun	PV	Land	No cooling	NA	Flat	BWh - Desert Hot	756.855	529.799	27.9632	27.0469	Desert. Also known as Masar Alam
17097	EGYPT	MASDAR DARB AL ARBAEEN	0.5	1538	769	Sun	PV	Land	No cooling	NA	Flat	BWh - Desert Hot	75.6855	52.9799	30.1406	23.6021	Desert. I cannot find it. I assume its land by its size and location
17098	EGYPT	MASDAR HALAYEB	1	1538	1538	Sun	PV	Land	No cooling	NA	Flat	BWh - Desert Hot	151.371	105.96	36.6679	22.1747	Desert. PV panels Masdar
17099	EGYPT	MASDAR MARSA ALAM	6	1538	9228	Sun	PV	Land	No cooling	NA	Flat	BWh - Desert Hot	908.226	635.758	34.8724	25.0623	Desert.
17100	EGYPT	MASDAR SHALATEEN	5	1538	7690	Sun	PV	Land	No cooling	NA	Flat	BWh - Desert Hot	756.855	529.799	35.6125	23.1271	Desert.
17101	EGYPT	MASS FACTORY	0.36	4386	1578.96	Oil	ICE	Diesel-Engines	Dry cooling	Air	Diesel	NA	511.583	358.108	31.2497	30.0626	By the size and fuel, it must be a small MCI generator
17102	EGYPT	MATROUH (West Delta)	60	4951	297060	NG	Rankine	Steam Turbine	Once through	Saline	Natural Gas, HFO	NA	11244.9	7485.91	27.2042	31.3704	Coast. https://www.openstreetmap.org/way/509611910#map=15/31.3607/27.2208
17103	EGYPT	NAGA HAMMADI	64	4751.3	304083	Hydropower	Dammed	NA	NA	NA	NA	NA	227601	227601	32.1694	26.1361	ROR
17104	EGYPT	NAGA HAMMADI SMELTER	10	4951	49510	NG	Rankine	Steam Turbine	Wet Tower	Freshwater	Natural Gas	BWh - Desert Hot	226773	180856	32.3358	25.9936	Rankine, groundwater fed cooling towers
17105	EGYPT	NEW ASYUT	400	4386	1754400	Oil	Rankine	Steam Turbine	Once through	Freshwater	HFO	BWh - Desert Hot	3.32056e+08	1.99234e+06	31.2012	27.1756	Once through cooling with water from the Nile. https://www.pgesco.com/projects/new-assiut-power-plant-1000-mw-fast-track/
17106	EGYPT	NEW ASYUT BARRAGE	32	4751.3	152042	Hydropower	Dammed	NA	NA	NA	NA	NA	1.73403e+06	1.73403e+06	31.1859	27.1783	ROR
17107	EGYPT	NEW DAMIETTA PLANT	1.35	4386	5921.1	Oil	ICE	Diesel-Engines	Dry cooling	Air	Diesel	NA	1918.43	1342.9	31.8	31.4	By the size and fuel, it must be a small MCI generator
17108	EGYPT	NEW TALKHA (New combined)	750	4951	3713250	NG	Combined	Combined Cycle (CC)	Once through	Freshwater	Natural Gas	BWh - Desert Hot	2.81124e+08	1.54618e+06	31.3956	31.0608	Combined cycle from 2010. Once trough with water from the Damietta Branch of the Nile. https://www.gem.wiki/New_Combined_Talkha_power_plant
17109	EGYPT	NUBARIA SUGAR PLANT	16	4951	79216	NG	Brayton	Gas Turbine	No cooling	NA	Natural Gas, HFO	NA	127443	101954	30.2291	30.6326	Brayton cycle to provide electricity to the sugarplant
17110	EGYPT	NUWEIBA DIESEL	5	4386	21930	Oil	ICE	Diesel-Engines	Dry cooling	Air	Diesel	NA	7105.31	4973.72	34.6709	29.0314	Group of diesel engines in two buildings
17111	EGYPT	PORT SAID	682	4951	3376582	NG	Rankine	Steam Turbine	Once through	Saline	Natural Gas	NA	127818	85089.8	32.5202	31.0995	Steam turbine, once through, coast
17112	EGYPT	PORT SAID	44	4386	192984	Oil	ICE	Diesel-Engines	Dry cooling	Air	HFO	NA	62526.8	43768.7	32.3	31.2667	Coast. Because of size and fuel I assume this is a MCI
17113	EGYPT	PORT SAID EAST	682	4951	3376582	NG	Rankine	Steam Turbine	Once through	Saline	Natural Gas, HFO	NA	127818	85089.8	32.5202	31.0995	Steam turbine. Coast. https://www.gem.wiki/Port_Said_East_power_plant
17114	EGYPT	QARUN FIELD	20.4	4951	101000	NG	Brayton	Gas Turbine	No cooling	NA	Natural Gas, HFO	NA	162489	129992	29.487	29.5396	Gas field managed by the Khalda Petroleum Company. Eight movable gas turbines
17115	EGYPT	QUENA MILL	45	4644.8	209016	Biomass	Rankine	Steam Turbine	Once through	Freshwater	Paper	BWh - Desert Hot	3.95606e+07	237363	32.754	25.9122	Along Nile. Paper mill. Once through
17116	EGYPT	RAS ABU SOMA	8	4386	35088	Oil	ICE	Diesel-Engines	Dry cooling	Air	Diesel	NA	11368.5	7957.95	33.9858	26.8469	I cannot find it. I assume a group of diesel engines for the Soma area
17117	EGYPT	RAS GHARIB	5	4951	24755	NG	Brayton	Gas Turbine	No cooling	NA	Natural Gas	NA	39825.8	31860.7	33.0899	28.3474	Three gas turbines. According to the satellite imaging, they were dismantled somewhere between june 2021 and january 2022
17118	EGYPT	RAS GHARIB (Ras Ghareb)	262.5	41.9	10998.8	Wind	Wind turbine	Onshore	No cooling	NA	NA	NA	0.00145722	0.00145722	33.0043	28.1743	https://www.power-technology.com/projects/ras-ghareb-windfarm/ https://www.gem.wiki/Ras_Ghareb_wind_farm
17119	EGYPT	RAS SIDR	4	4386	17544	Oil	ICE	Diesel-Engines	Dry cooling	Air	Diesel	NA	5684.25	3978.98	32.7104	29.5874	Group of diesel engines
17120	EGYPT	SAFAGA	9.9	4386	43421.4	Oil	ICE	Diesel-Engines	Dry cooling	Air	Diesel	NA	14068.5	9847.97	33.9333	26.7333	I cannot find it. Likely a group of diesel engines in Safaga port. Coast
17121	EGYPT	SAPPHIRE TERMINAL	4.7	4951	23269.7	NG	Brayton	Gas Turbine	No cooling	NA	Natural Gas	NA	37436.3	29949	30.3303	31.3728	In the idku terminal, in the place where the gas from the sapphire field comes from
17122	EGYPT	SHARM EL SHEIKH	10	4951	49510	NG	Brayton	Gas Turbine	No cooling	NA	Natural Gas	NA	79651.7	63721.4	34.3016	27.8771	Six units of gas turbines
17123	EGYPT	SHARM EL SHEIKH	432	4386	1894752	Oil	Brayton	Gas Turbine	No cooling	NA	HFO, Natural Gas	NA	3.04828e+06	2.43862e+06	34.2881	27.8636	Brayton. Coast
17124	EGYPT	SHARQ EL-OWEINAT	12	4386	52632	Oil	ICE	Diesel-Engines	Dry cooling	Air	Diesel	NA	17052.8	11936.9	28.7162	22.5825	Groundwater pump station in the desert with diesel engines
17125	EGYPT	SIDI BARRANI	7	4386	30702	Oil	ICE	Diesel-Engines	Dry cooling	Air	Diesel	NA	9947.44	6963.21	25.9476	31.6175	Diesel generators for the desalination plant
17126	EGYPT	SIDI KRIR-I	640	4951	3168640	NG	Rankine	Steam Turbine	Once through	Saline	Natural Gas, HFO	NA	119946	79849.7	29.6585	31.0433	Part of the Sidi Krir Complex. Two Rankine steam towers. Coast. https://www.gem.wiki/Sidi_Krir_power_plant
17127	EGYPT	SIDI KRIR-II	682.5	4951	3.37906e+06	NG	Rankine	Steam Turbine	Once through	Saline	Natural Gas, HFO	NA	127911	85152.2	29.6585	31.0433	Part of the Sidi Krir Complex.Two Steam turbines ST3 and ST$. Coast. https://www.gem.wiki/Sidi_Krir_power_plant
17128	EGYPT	SIDI KRIR-III	750	4951	3713250	NG	Combined	Combined Cycle (CC)	Once through	Saline	Natural Gas, HFO	NA	140562	98393.3	29.6585	31.0433	Part of the Sidi Krir Complex.one combined cycle unit. Coast. https://www.gem.wiki/Sidi_Krir_power_plant
17129	EGYPT	SIWA	7.6	4386	33333.6	Oil	ICE	Diesel-Engines	Dry cooling	Air	Diesel	NA	10800.1	7560.05	25.521	29.187	Diesel power plant for the Siwa village
17130	EGYPT	SIWA	10	1538	15380	Sun	PV	Land	No cooling	NA	Flat	BWh - Desert Hot	1513.71	1059.6	25.5195	29.2041	Desert.
17131	EGYPT	SODFA-EL GHANAYEM WWTP	0.805	4386	3530.73	Oil	ICE	Diesel-Engines	Dry cooling	Air	Diesel	NA	1143.96	800.769	31.3685	26.9396	By the size and fuel, it must be a small MCI generator
17132	EGYPT	SOUTH HELWAN	1950	4951	9654450	NG	Rankine	Steam Turbine	Once through	Freshwater	Natural Gas, HFO	BWh - Desert Hot	1.27911e+09	6.94375e+06	31.2165	29.219	Three units of Steam turbines. Once through with water from the Nile. https://www.gem.wiki/South_Helwan_power_station
17133	EGYPT	SUEZ	650	4951	3218150	NG	Rankine	Steam Turbine	Once through	Saline	Natural Gas, HFO	NA	121820	81097.3	32.5041	29.9511	Steam turbine with once through cooling.. Coast. Start year 2017. https://www.gem.wiki/Suez_power_plant
17134	EGYPT	SUEZ GULF	682	4951	3376582	NG	Rankine	Steam Turbine	Once through	Saline	Natural Gas, HFO	NA	127818	85089.8	32.3537	29.6185	One unit of Steam turbine. Coast. https://www.gem.wiki/Suez_Gulf_power_plant
17135	EGYPT	TABA	6.8	4386	29824.8	Oil	ICE	Diesel-Engines	Dry cooling	Air	Diesel	NA	9663.23	6764.26	34.8926	29.4915	Diesel generators for the Taba village
17136	EGYPT	TADO FACTORY	0.61	4386	2675.46	Oil	ICE	Diesel-Engines	Dry cooling	Air	Diesel	NA	866.848	606.794	31.2497	30.0626	By the size and fuel, it must be a small MCI generator
17137	EGYPT	TALKHA SEMADCO	17.7	4386	77632.2	Oil	ICE	Diesel-Engines	Dry cooling	Air	Diesel	NA	25152.8	17607	30.8079	30.8305	fertilizer plant. Group of diesel generators inside the SEMADCO plant's complex
17138	EGYPT	TALKHA STEAM	420	4951	2079420	NG	Rankine	Steam Turbine	Wet Tower	Freshwater	Natural Gas, HFO	BWh - Desert Hot	9.52447e+06	7.59596e+06	31.3779	31.0539	Steam turbine. Decommissioned in 2022. https://www.gem.wiki/Talkha_Steam_power_plant
17139	EGYPT	TANTA CITY	3	4386	13158	Oil	ICE	Diesel-Engines	Dry cooling	Air	Diesel	NA	4263.19	2984.23	31.0019	30.7885	I cannot find it, but for its size and fuel its likely a group of diesel engines
17140	EGYPT	TEC PLANT	0.4	4386	1754.4	Oil	ICE	Diesel-Engines	Dry cooling	Air	Diesel	NA	568.425	397.898	31.2497	30.0626	By the size and fuel, it must be a small MCI generator
17141	EGYPT	TOSHKA	12.69	4386	55658.3	Oil	ICE	Diesel-Engines	Dry cooling	Air	Diesel	NA	18033.3	12623.3	31.5317	22.8741	Pumping station for irrigation water. Near lake.
17142	EGYPT	WADI EL-NATRUN	0.04	1538	61.52	Sun	PV	Land	No cooling	NA	Flat	BWh - Desert Hot	6.05484	4.23839	30.2149	30.4183	Desert.
17143	EGYPT	WADI EL-RAYAN	0.05	4386	219.3	Oil	ICE	Diesel-Engines	Dry cooling	Air	Diesel	NA	71.0531	49.7372	30.3167	29.1667	By the size and fuel, it must be a small MCI generator
17144	EGYPT	WADI EL-RAYAN	0.038	1538	58.444	Sun	PV	Rooftop	No cooling	NA	Flat	BWh - Desert Hot	0.818568	0.572998	30.1667	29.1167	Desert. I cannot find it. I assume it is rooftop by its size and location
17145	EGYPT	WADI HOF	100.2	4951	496090	NG	Brayton	Gas Turbine	No cooling	NA	Natural Gas, HFO	NA	798110	638488	31.3192	29.8756	Power plant decommisioned. By the end of 2019 the fuel tanks were gone, and the turbines were gone by may of 2022. Open cycle gas turbine. https://www.openstreetmap.org/way/219754953#map=17/29.87527/31.31880
17146	EGYPT	WEST DAMIETTA	1500	4951	7426500	NG	Combined	Combined Cycle (CC)	Dry cooling	Air	Natural Gas, HFO	NA	281124	196787	31.6047	31.4429	Two sets of fourn combined cycle units + one dry cooling tower. Near the Coast. https://www.gem.wiki/West_Damietta_power_plant
17147	EGYPT	ZAFARANA	545	41.9	22835.5	Wind	Wind turbine	Onshore	No cooling	NA	NA	NA	0.00302546	0.00302546	32.621	29.1988	https://www.gem.wiki/Zafarana_wind_farm
17148	EGYPT	ZAGAZIG CITY	5.58	4386	24473.9	Oil	ICE	Diesel-Engines	Dry cooling	Air	Diesel	NA	7929.53	5550.67	31.4759	30.5722	Group of diesel engines near the fuel depot of the city
18001	EQUATORIAL GUINEA	ANNOBON ISLAND	1	2925	2925	Oil	ICE	Diesel-Engines	Dry cooling	Air	Diesel	NA	947.699	663.389	5.61951	-1.42211	Coast. By its size and location is a diesel engine
18002	EQUATORIAL GUINEA	BATA	38	2925	111150	NG	ICE	Gas-Engines	Dry cooling	Air	Natural Gas	NA	36012.6	25208.8	9.74771	1.82511	Coast
18003	EQUATORIAL GUINEA	BATA	24.84	2925	72657	Oil	ICE	Diesel-Engines	Dry cooling	Air	Diesel	NA	23540.8	16478.6	9.74771	1.82511	Coast. But for size and fuel, assume that this is MCI
18004	EQUATORIAL GUINEA	BICOMO	3.2	1011.1	3235.52	Hydropower	ROR	NA	NA	NA	NA	NA	52356.3	52356.3	8.7196	3.7806	ROR
18005	EQUATORIAL GUINEA	DJIBLOHO	120	1011.1	121332	Hydropower	Dammed	NA	NA	NA	NA	NA	0	0	10.5	1.58333	ROR
18006	EQUATORIAL GUINEA	MALABO	100	2925	292500	NG	Brayton	Gas Turbine	No cooling	NA	Natural Gas	NA	470574	376459	8.71902	3.77245	Coast
18007	EQUATORIAL GUINEA	MUSOLA	0.55	1011.1	556.105	Hydropower	ROR	NA	NA	NA	NA	NA	0	0	8.61909	3.43621	ROR
18008	EQUATORIAL GUINEA	PUNTA EUROPA	52.4	2925	153270	NG	Brayton	Gas Turbine	No cooling	NA	Natural Gas	NA	246581	197265	8.71705	3.79003	Coast. Considering that this is a LNG terminal, assumed Natural Gas
18009	EQUATORIAL GUINEA	RIABA	3.6	1011.1	3639.96	Hydropower	ROR	NA	NA	NA	NA	NA	11976.3	11976.3	8.76209	3.38288	ROR
19001	ERITREA	ABA SAMUEL	6.6	4751.3	31358.6	Hydropower	ROR	NA	NA	NA	NA	NA	31592.8	31592.8	40.6347	7.54604	Reservoir https://www.cleanriverstrust.co.uk/aba-samuel-reservoir/
19002	ERITREA	ADI HALO	2	1496.4	2992.8	Sun	PV	Land	No cooling	NA	Flat	BSh - Arid Steppe - Hot	294.553	206.187	38.8168	15.1863	Semi-arid.
19003	ERITREA	ADI-KEIH	1	1955	1955	Oil	ICE	Diesel-Engines	Dry cooling	Air	Diesel	NA	633.419	443.394	39.3772	14.8444	By the size and fuel, it must be a small MCI generator
19004	ERITREA	ASSAB	8.7	1955	17008.5	Oil	ICE	Diesel-Engines	Dry cooling	Air	HFO	NA	5510.75	3857.52	42.7394	13.0092	Once trough. Refinery. Internal combustion
19005	ERITREA	ASSAB WIND	0.825	1818	1499.85	Wind	Wind turbine	Onshore	No cooling	NA	NA	NA	0.000198714	0.000198714	42.7369	13.0139	Wind farm
19006	ERITREA	BELEZA	33.1	1955	64710.5	Oil	ICE	Diesel-Engines	Dry cooling	Air	HFO	NA	20966.2	14676.3	38.9218	15.4197	Internal combustion. Near lake. Looks like it uses once through for the engine's cooling. Seems abandoned or in the need of large repairs https://documents1.worldbank.org/curated/en/594161468233719926/pdf/437320PJPR0P1117382B01OFF0USE0ONLY1.pdf
19007	ERITREA	BISHA MINE	22	1955	43010	Oil	ICE	Diesel-Engines	Dry cooling	Air	Diesel	NA	13935.2	9754.66	37.5105	15.519	Very likely group of diesel engines working for the mine
19008	ERITREA	BISHA MINE	7.5	1496.4	11223	Sun	PV	Land	No cooling	NA	Flat	BWh - Desert Hot	1104.58	773.203	37.5138	15.5171	Desert. https://solarbw.com/aggreko-powers-bisha-mine-with-hybrid-plant/
19009	ERITREA	HIRGIGO	132	1955	258060	Oil	Rankine	Steam Turbine	Once through	Saline	HFO	NA	41865.6	27870.5	39.4422	15.5786	Coast, once through. Rankine. By the looks of the fuel tanks it seems like HFO
19010	ERITREA	KEREN	1	1955	1955	Oil	ICE	Diesel-Engines	Dry cooling	Air	Diesel	NA	633.419	443.394	38.4581	15.7778	By the size and fuel, it must be a small MCI generator
19011	ERITREA	MENDEFERA	1	1955	1955	Oil	ICE	Diesel-Engines	Dry cooling	Air	Diesel	NA	633.419	443.394	38.8153	14.8872	By the size and fuel, it must be a small MCI generator
19012	ERITREA	TESSENAI	2.7	1955	5278.5	Oil	ICE	Diesel-Engines	Dry cooling	Air	Diesel	NA	1710.23	1197.16	36.6526	15.1634	I cannot find. Probably a diesel engine for the Tessenay village
20001	ETHIOPIA	ABA SAMUEL	6.6	4481.4	29577.2	Hydropower	Dammed	NA	NA	NA	NA	NA	0	0	38.7051	8.81588	https://www.eep.com.et/en/power-generation/
20002	ETHIOPIA	ABI ADDI	0.155	26	4.03	Oil	ICE	Diesel-Engines	Dry cooling	Air	Diesel	NA	1.30572	0.914003	38.9739	13.5608	By the size and fuel, it must be a small MCI generator
20003	ETHIOPIA	ADAMA WIND	204	2426	494904	Wind	Wind turbine	Onshore	No cooling	NA	NA	NA	0.0655695	0.0655695	39.2599	8.59641	https://www.gem.wiki/Adama_wind_farm
20004	ETHIOPIA	ADDIS BREWERY	3.8	26	98.8	Oil	ICE	Diesel-Engines	Dry cooling	Air	Diesel	NA	32.0112	22.4078	38.7469	9.02497	Likely a group of diesel generators for the Brewery
20005	ETHIOPIA	ADOLA	1.86	4481.4	8335.4	Hydropower	ROR	NA	NA	NA	NA	NA	0	0	38.9833	5.88333	ROR (very small)
20006	ETHIOPIA	ALEM KETEMA	0.486	26	12.636	Oil	ICE	Diesel-Engines	Dry cooling	Air	Diesel	NA	4.09406	2.86584	39.0333	10.0833	By the size and fuel, it must be a small MCI generator
20007	ETHIOPIA	ASAYTA	0.941	26	24.466	Oil	ICE	Diesel-Engines	Dry cooling	Air	Diesel	NA	7.92698	5.54888	41.4394	11.5636	By the size and fuel, it must be a small MCI generator
20008	ETHIOPIA	ASHEGODA-1	30	2426	72780	Wind	Wind turbine	Onshore	No cooling	NA	NA	NA	0.00964258	0.00964258	39.5735	13.4255	Ashengoda wind farm. https://www.gem.wiki/Ashegoda_wind_farm
20009	ETHIOPIA	ASHEGODA-2	90.18	2426	218777	Wind	Wind turbine	Onshore	No cooling	NA	NA	NA	0.0289856	0.0289856	39.5735	13.4255	Ashengoda wind farm. https://www.gem.wiki/Ashegoda_wind_farm
20010	ETHIOPIA	ASOSSA	0.839	26	21.814	Oil	ICE	Diesel-Engines	Dry cooling	Air	Diesel	NA	7.06773	4.94741	34.5333	10.0667	By the size and fuel, it must be a small MCI generator
20011	ETHIOPIA	AWASH 7 KILO	35	26	910	Oil	ICE	Diesel-Engines	Dry cooling	Air	Diesel	NA	294.84	206.388	39.3333	8.4	Likely a group of diesel engines. Probably in Awash, not here.
20012	ETHIOPIA	AWASH-I (KOKA)	43.2	4481.4	193596	Hydropower	Dammed	NA	NA	NA	NA	NA	9.78214e+07	9.78214e+07	39.3522	8.39251	reservoir
20013	ETHIOPIA	AWASH-II	32	4481.4	143405	Hydropower	ROR	NA	NA	NA	NA	NA	52109.4	52109.4	39.3522	8.39251	ROR
20014	ETHIOPIA	AWASH-III	32	4481.4	143405	Hydropower	ROR	NA	NA	NA	NA	NA	68121.3	68121.3	39.3522	8.39251	ROR
20015	ETHIOPIA	BAHIR DAR UNIVERSITY	0.01	1496.4	14.964	Sun	PV	Rooftop	No cooling	NA	Flat	Csb - Temperate Dry Summer	0.0566449	0.0396514	37.3973	11.574	City. I cannot see it, but for its size I assume is rooftop
20016	ETHIOPIA	BELES	460	4481.4	2.06144e+06	Hydropower	Dammed	NA	NA	NA	NA	NA	0	0	37.21	11.68	reservoir
20017	ETHIOPIA	BIZET	0.55	26	14.3	Oil	ICE	Diesel-Engines	Dry cooling	Air	Diesel	NA	4.6332	3.24324	39.2902	14.2816	By the size and fuel, it must be a small MCI generator
20018	ETHIOPIA	BONGA	0.77	26	20.02	Oil	ICE	Diesel-Engines	Dry cooling	Air	Diesel	NA	6.48647	4.54053	36.2424	7.27225	By the size and fuel, it must be a small MCI generator
20019	ETHIOPIA	BOTOR BECHO SAWMILL	1	199	199	Biomass	Rankine	Steam Turbine	No cooling	NA	Wood	NA	32.2842	22.5989	37.2731	8.36729	The satellite image is not clear enough, but I see that it uses the residues of wood as fuel. No cooling towers, no source of water nearby. https://www.ajol.info/index.php/sinet/article/view/18270/38637
20020	ETHIOPIA	BUNO BEDELLE	0.153	4481.4	685.654	Hydropower	ROR	NA	NA	NA	NA	NA	0	0	36.3522	8.45614	ROR (very small)
20021	ETHIOPIA	DEGEHABOUR	0.286	26	7.436	Oil	ICE	Diesel-Engines	Dry cooling	Air	Diesel	NA	2.40926	1.68648	43.5572	8.22056	By the size and fuel, it must be a small MCI generator
20022	ETHIOPIA	DEMBI	0.8	4481.4	3585.12	Hydropower	ROR	NA	NA	NA	NA	NA	0	0	36.4614	8.08133	ROR (very small)
20023	ETHIOPIA	DIRE DAWA	40.3	26	1047.8	Oil	ICE	Diesel-Engines	Dry cooling	Air	Diesel	NA	339.487	237.641	41.8661	9.59306	Likely diesel engines for the city of Dire-Dawa
20024	ETHIOPIA	DJIMA	0.195	4481.4	873.873	Hydropower	ROR	NA	NA	NA	NA	NA	0	0	36.8333	7.66667	ROR (very small)
20025	ETHIOPIA	DUBTI	0.486	26	12.636	Oil	ICE	Diesel-Engines	Dry cooling	Air	Diesel	NA	4.09406	2.86584	41.0853	11.7361	By the size and fuel, it must be a small MCI generator
20026	ETHIOPIA	FINCHAA	133.9	4481.4	600059	Hydropower	Dammed	NA	NA	NA	NA	NA	4.00049e+08	4.00049e+08	37.3833	9.55	reservoir
20027	ETHIOPIA	FINCHAA SUGAR	31	199	6169	Biomass	Rankine	Steam Turbine	Wet Tower	Freshwater	Sugarcane	Csb - Temperate Dry Summer	15249	11909.6	37.4212	9.79471	River, CHP, forced flow cooling towers
20028	ETHIOPIA	FINCHAA-AMERTI-NESHE (FAN)	97	4481.4	434696	Hydropower	Dammed	NA	NA	NA	NA	NA	5.42436e+07	5.42436e+07	35.7333	8.6	reservoir
20029	ETHIOPIA	GENALE-DAWA-III	254	4481.4	1.13828e+06	Hydropower	Dammed	NA	NA	NA	NA	NA	613108	613108	42.0167	4.26667	Reservoir
20030	ETHIOPIA	GHIMBI	1.078	26	28.028	Oil	ICE	Diesel-Engines	Dry cooling	Air	Diesel	NA	9.08106	6.35675	35.8333	9.16667	Hospital. Assumed Diesel generator due to its size and fuel.
20031	ETHIOPIA	GILGEL GIBE-I	183.9	4481.4	824129	Hydropower	Dammed	NA	NA	NA	NA	NA	5.11548e+07	5.11548e+07	37.391	7.929	reservoir
20032	ETHIOPIA	GILGEL GIBE-II	420	4481.4	1.88219e+06	Hydropower	ROR	NA	NA	NA	NA	NA	91821	91821	37.391	7.929	reservoir
20033	ETHIOPIA	GILGEL GIBE-III	1870	4481.4	8.38022e+06	Hydropower	Dammed	NA	NA	NA	NA	NA	185504130	185504130	37.3042	6.85607	reservoir
20034	ETHIOPIA	GINIR	0.305	26	7.93	Oil	ICE	Diesel-Engines	Dry cooling	Air	Diesel	NA	2.56932	1.79852	40.7108	7.14025	By the size and fuel, it must be a small MCI generator
20035	ETHIOPIA	GODE	0.791	26	20.566	Oil	ICE	Diesel-Engines	Dry cooling	Air	Diesel	NA	6.66338	4.66437	43.1303	6.0225	By the size and fuel, it must be a small MCI generator
20036	ETHIOPIA	HARAR BREWERY	1.665	26	43.29	Oil	ICE	Diesel-Engines	Dry cooling	Air	Diesel	NA	14.0259	9.81816	42.1261	9.30058	Diesel generator for the Brewery.
20037	ETHIOPIA	HAWZEIN	0.15	26	3.9	Oil	ICE	Diesel-Engines	Dry cooling	Air	Diesel	NA	1.2636	0.884519	39.4297	13.9784	By the size and fuel, it must be a small MCI generator
20038	ETHIOPIA	JINKA	0.705	26	18.33	Oil	ICE	Diesel-Engines	Dry cooling	Air	Diesel	NA	5.93892	4.15724	36.65	5.65	By the size and fuel, it must be a small MCI generator
20039	ETHIOPIA	KALITI	13.44	26	349.44	Oil	ICE	Diesel-Engines	Dry cooling	Air	Diesel	NA	113.218	79.2529	38.7694	8.8905	Likely a group of diesel engines. Probably for the industries nearby
20040	ETHIOPIA	KEBRI DEHAR	0.3	26	7.8	Oil	ICE	Diesel-Engines	Dry cooling	Air	Diesel	NA	2.5272	1.76904	44.2781	6.74	By the size and fuel, it must be a small MCI generator
20041	ETHIOPIA	KOREM	1.291	26	33.566	Oil	ICE	Diesel-Engines	Dry cooling	Air	Diesel	NA	10.8754	7.61276	39.5228	12.5058	Hospital. Assumed Diesel generator due to its size and fuel.
20042	ETHIOPIA	LALIBELA	0.155	26	4.03	Oil	ICE	Diesel-Engines	Dry cooling	Air	Diesel	NA	1.30572	0.914003	39.0333	12.0333	By the size and fuel, it must be a small MCI generator
20043	ETHIOPIA	MEHAL MEDA	0.579	26	15.054	Oil	ICE	Diesel-Engines	Dry cooling	Air	Diesel	NA	4.87749	3.41424	39.6667	10.3	By the size and fuel, it must be a small MCI generator
20044	ETHIOPIA	MELKA WAKENA	153	4481.4	685654	Hydropower	Dammed	NA	NA	NA	NA	NA	0	0	39.4175	7.1494	reservoir
20045	ETHIOPIA	METAHARA SUGAR	6.6	199	1313.4	Biomass	Rankine	Steam Turbine	No cooling	NA	Sugarcane	NA	213.075	149.153	39.9224	8.83673	River, CHP, no cooling towers. No need of cooling
20046	ETHIOPIA	METEMA	0.14	26	3.64	Oil	ICE	Diesel-Engines	Dry cooling	Air	Diesel	NA	1.17936	0.825551	36.2	12.9667	By the size and fuel, it must be a small MCI generator
20047	ETHIOPIA	MOYALE	0.64	26	16.64	Oil	ICE	Diesel-Engines	Dry cooling	Air	Diesel	NA	5.39136	3.77395	39.0584	3.5167	By the size and fuel, it must be a small MCI generator
20048	ETHIOPIA	MOYALIE	0.719	26	18.694	Oil	ICE	Diesel-Engines	Dry cooling	Air	Diesel	NA	6.05685	4.2398	39.0486	3.54349	By the size and fuel, it must be a small MCI generator
20049	ETHIOPIA	NEFAS MEWICHA	0.84	26	21.84	Oil	ICE	Diesel-Engines	Dry cooling	Air	Diesel	NA	7.07615	4.95331	38.4667	11.7333	By the size and fuel, it must be a small MCI generator
20050	ETHIOPIA	NEGELE BORENA	2.153	26	55.978	Oil	ICE	Diesel-Engines	Dry cooling	Air	Diesel	NA	18.1369	12.6958	39.5624	5.33995	By its size and fuel I assume it is an ICE with diesel
20051	ETHIOPIA	NEJJO	0.15	26	3.9	Oil	ICE	Diesel-Engines	Dry cooling	Air	Diesel	NA	1.2636	0.884519	35.5	9.5	By the size and fuel, it must be a small MCI generator
20052	ETHIOPIA	NEKEMTE	2.272	26	59.072	Oil	ICE	Diesel-Engines	Dry cooling	Air	Diesel	NA	19.1393	13.3975	36.55	9.08333	Diesel generator for the Hospital Unit
20053	ETHIOPIA	PHARMACURE PLANT	1.201	26	31.226	Oil	ICE	Diesel-Engines	Dry cooling	Air	Diesel	NA	10.1172	7.08205	38.7469	9.02497	By the size and fuel, it must be a small MCI generator
20054	ETHIOPIA	REMA-DIRE	0.15	1496.4	224.46	Sun	PV	Rooftop	No cooling	NA	Flat	Cwb - Temperate Dry Winter	0.849674	0.594771	38.9176	10.2762	City. I cannot see it, but for its size I assume is rooftop
20055	ETHIOPIA	REPPIE (KOSHE) LANDFILL	50	199	9950	Biomass	Rankine	Steam Turbine	Wet Tower	Freshwater	Waste	Cwb - Temperate Dry Winter	24595.1	19209.1	38.7092	8.9751	Waste incineration, cooling towers. Combined cycle
20056	ETHIOPIA	SEKOTA	0.155	26	4.03	Oil	ICE	Diesel-Engines	Dry cooling	Air	Diesel	NA	1.30572	0.914003	39.0392	12.637	By the size and fuel, it must be a small MCI generator
20057	ETHIOPIA	SETIT HUMERA	0.29	26	7.54	Oil	ICE	Diesel-Engines	Dry cooling	Air	Diesel	NA	2.44296	1.71007	36.6293	14.2646	By the size and fuel, it must be a small MCI generator
20058	ETHIOPIA	SHEARATON ADDIS	2.4	26	62.4	Oil	ICE	Diesel-Engines	Dry cooling	Air	Diesel	NA	20.2176	14.1523	38.7469	9.02497	Likely a group of diesel generators for the sheraton Hotel
20059	ETHIOPIA	SHIRE	1.036	26	26.936	Oil	ICE	Diesel-Engines	Dry cooling	Air	Diesel	NA	8.72726	6.10908	38.4028	14.1383	By its size and fuel I assume it is an ICE with diesel
20060	ETHIOPIA	SOR RIVER	5	4481.4	22407	Hydropower	ROR	NA	NA	NA	NA	NA	0	0	35.4397	8.39762	ROR
20061	ETHIOPIA	TEKEZE-I	300	4481.4	1344420	Hydropower	Dammed	NA	NA	NA	NA	NA	1.29169e+08	1.29169e+08	38.71	13.3	reservoir
20062	ETHIOPIA	TENDAHO SUGAR	60	199	11940	Biomass	Rankine	Steam Turbine	Wet Tower	Freshwater	Sugarcane	BWh - Desert Hot	54237.4	49717.6	41.3897	11.5504	CHP, cooling towers, river
20063	ETHIOPIA	TENTA	0.14	26	3.64	Oil	ICE	Diesel-Engines	Dry cooling	Air	Diesel	NA	1.17936	0.825551	39.2495	11.3232	By the size and fuel, it must be a small MCI generator
20064	ETHIOPIA	TEPPI	0.486	26	12.636	Oil	ICE	Diesel-Engines	Dry cooling	Air	Diesel	NA	4.09406	2.86584	35.45	7.2	By the size and fuel, it must be a small MCI generator
20065	ETHIOPIA	TIS ABAY	84.4	4481.4	378230	Hydropower	ROR	NA	NA	NA	NA	NA	0	0	37.5833	11.4833	ROR
20066	ETHIOPIA	WARDER	0.14	26	3.64	Oil	ICE	Diesel-Engines	Dry cooling	Air	Diesel	NA	1.17936	0.825551	45.3408	6.97444	By the size and fuel, it must be a small MCI generator
20067	ETHIOPIA	WONJI SHOA	31.5	199	6268.5	Biomass	Rankine	Steam Turbine	Wet tower	Freshwater	Sugarcane	Cwb - Temperate Dry Winter	15494.9	12101.7	39.3095	8.37674	Cooling Tower, CHP
20068	ETHIOPIA	WORE-ILU	0.28	26	7.28	Oil	ICE	Diesel-Engines	Dry cooling	Air	Diesel	NA	2.35872	1.6511	39.4333	10.6	By the size and fuel, it must be a small MCI generator
20069	ETHIOPIA	YADOT RIVER	0.344	4481.4	1541.6	Hydropower	ROR	NA	NA	NA	NA	NA	0	0	39.8485	6.42189	ROR (very small)
21001	GABON	AKOK	0.03	1129	33.87	Oil	ICE	Diesel-Engines	Dry cooling	Air	Diesel	NA	10.9739	7.68171	11.608	1.63731	By its size and fuel I assume it is an ICE with diesel
21002	GABON	ALENAKIRI	70	3923	274610	NG	ICE	Gas-Engines	Dry cooling	Air	Natural Gas, Diesel	NA	88973.6	62281.5	9.52094	0.314301	Diesel Engines dry cooling. https://telemenia.com/en/large-scale-power-plants/liberville-alenakiri-gabon/
21003	GABON	BIFOUN	0.11	1129	124.19	Oil	ICE	Diesel-Engines	Dry cooling	Air	Diesel	NA	40.2375	28.1663	10.3833	-0.333333	By the size and fuel, it must be a small MCI generator
21004	GABON	BITAM	1.76	1129	1987.04	Oil	ICE	Diesel-Engines	Dry cooling	Air	Diesel	NA	643.8	450.66	11.5006	2.07597	By its size and fuel I assume it is an ICE with diesel
21005	GABON	BONGOLO	6.23	4826.8	30071	Hydropower	ROR	NA	NA	NA	NA	NA	15285.1	15285.1	11.4611	-2.23874	ROR
21006	GABON	CAP LOPEZ	35	3923	137305	NG	ICE	Gas-Engines	Dry cooling	Air	Natural Gas, Diesel	NA	44486.8	31140.7	8.71948	-0.69675	Group of diesel engines for the gas and oil port
21007	GABON	COCO BEACH	0.64	1129	722.56	Oil	ICE	Diesel-Engines	Dry cooling	Air	Diesel	NA	234.109	163.876	9.58229	1.00019	By the size and fuel, it must be a small MCI generator
21008	GABON	FOUGAMOU	0.82	1129	925.78	Oil	ICE	Diesel-Engines	Dry cooling	Air	Diesel	NA	299.952	209.967	10.5902	-1.21038	By the size and fuel, it must be a small MCI generator
21009	GABON	GAMBA	3.4	3923	13338.2	NG	ICE	Gas-Engines	Dry cooling	Air	Natural Gas	NA	4321.57	3025.1	10.0183	-2.77839	Group of diesel engines near the woodgroup office. Near the coast
21010	GABON	GRAND POUBARA	160	4826.8	772288	Hydropower	Dammed	NA	NA	NA	NA	NA	0	0	13.552	-1.77329	Reservoir
21011	GABON	IBOUNDJI	0.4	4826.8	1930.72	Hydropower	ROR	NA	NA	NA	NA	NA	0	0	12.4667	-1.14134	ROR
21012	GABON	KINGUELE	57.6	4826.8	278024	Hydropower	ROR	NA	NA	NA	NA	NA	0	0	10.281	0.455	ROR
21013	GABON	KOULA-MOUTOU	4.73	1129	5340.17	Oil	ICE	Diesel-Engines	Dry cooling	Air	Diesel	NA	1730.21	1211.15	12.4705	-1.14394	Group of diesel engines in the power plant
21014	GABON	LAMBARENE	4.5	1129	5080.5	Oil	ICE	Diesel-Engines	Dry cooling	Air	Diesel	NA	1646.08	1152.26	10.221	-0.7141	Group of diesel engines in the power plant, which is also used for the water pumping of the village
21015	GABON	LASTOURVILLE	1.01	1129	1140.29	Oil	ICE	Diesel-Engines	Dry cooling	Air	Diesel	NA	369.454	258.618	12.7793	-0.831318	By the size and fuel, it must be a small MCI generator
21016	GABON	LECONI	0.456	1129	514.824	Oil	ICE	Diesel-Engines	Dry cooling	Air	Diesel	NA	166.803	116.762	14.2591	-1.58431	By the size and fuel, it must be a small MCI generator
21017	GABON	MAKOKOU	1.352	1129	1526.41	Oil	ICE	Diesel-Engines	Dry cooling	Air	Diesel	NA	494.556	346.189	12.8642	0.573811	By the size and fuel, it must be a small MCI generator
21018	GABON	MALINGA	0.47	4826.8	2268.6	Hydropower	ROR	NA	NA	NA	NA	NA	0	0	11.9063	-1.90234	ROR
21019	GABON	MANDJI	0.167	1129	188.543	Oil	ICE	Diesel-Engines	Dry cooling	Air	Diesel	NA	61.0879	42.7615	12.3322	-2.03709	By the size and fuel, it must be a small MCI generator
21020	GABON	MAYUMBA	0.83	1129	937.07	Oil	ICE	Diesel-Engines	Dry cooling	Air	Diesel	NA	303.61	212.527	10.6554	-3.43198	By the size and fuel, it must be a small MCI generator
21021	GABON	MBIGOU	0.2	4826.8	965.36	Hydropower	ROR	NA	NA	NA	NA	NA	0	0	12.3789	-1.41351	ROR
21022	GABON	MEKAMBO	0.25	1129	282.25	Oil	ICE	Diesel-Engines	Dry cooling	Air	Diesel	NA	91.4489	64.0142	13.9594	1.00652	By the size and fuel, it must be a small MCI generator
21023	GABON	MIMONGO	0.2	1129	225.8	Oil	ICE	Diesel-Engines	Dry cooling	Air	Diesel	NA	73.1591	51.2114	11.6	-1.18333	By the size and fuel, it must be a small MCI generator
21024	GABON	MINVOUL	0.25	1129	282.25	Oil	ICE	Diesel-Engines	Dry cooling	Air	Diesel	NA	91.4489	64.0142	12.132	2.15161	By the size and fuel, it must be a small MCI generator
21025	GABON	MITZIC	0.83	1129	937.07	Oil	ICE	Diesel-Engines	Dry cooling	Air	Diesel	NA	303.61	212.527	11.549	0.782055	By the size and fuel, it must be a small MCI generator
21026	GABON	MOABI	0.254	1129	286.766	Oil	ICE	Diesel-Engines	Dry cooling	Air	Diesel	NA	92.9121	65.0385	11.0007	-2.42245	By the size and fuel, it must be a small MCI generator
21027	GABON	MOANDA COMILOG	2.815	1129	3178.13	Oil	ICE	Diesel-Engines	Dry cooling	Air	HFO	NA	1029.71	720.8	13.236	-1.54039	Group of diesel engines for the Manganese Mine in Comilog
21028	GABON	MOUILA	2.7	1129	3048.3	Oil	ICE	Diesel-Engines	Dry cooling	Air	Diesel	NA	987.648	691.354	11.0559	-1.86846	Cannot find it, but considering its size and location assumed is an ICE
21029	GABON	MOYABI	8.8	1129	9935.2	Oil	ICE	Diesel-Engines	Dry cooling	Air	Diesel	NA	3219	2253.3	13.3258	-1.66838	By the size and fuel, it must be a group of ICE generators
21030	GABON	NDINDI	0.112	1129	126.448	Oil	ICE	Diesel-Engines	Dry cooling	Air	Diesel	NA	40.9691	28.6784	12.02	-1.76098	Inland in green area. By the size and fuel, it must be a small MCI generator
21031	GABON	NDJOLE	1.08	1129	1219.32	Oil	ICE	Diesel-Engines	Dry cooling	Air	Diesel	NA	395.059	276.542	10.7649	-0.17827	By the size and fuel, it must be a small MCI generator
21032	GABON	OMBOUE	0.45	1129	508.05	Oil	ICE	Diesel-Engines	Dry cooling	Air	Diesel	NA	164.608	115.226	9.26184	-1.57464	By the size and fuel, it must be a small MCI generator
21033	GABON	OWENDO	128	3923	502144	NG	ICE	Gas-Engines	Dry cooling	Air	Natural Gas, Diesel	NA	162695	113886	9.50519	0.346002	Diesel engines. Groups of cooling racks. River nearby. https://hawilti.com/energy/gastopower/gabon-signs-concession-agreement-for-new-120-mw-gas-to-power-plant/
21034	GABON	OYEM	4.95	1129	5588.55	Oil	ICE	Diesel-Engines	Dry cooling	Air	Diesel	NA	1810.69	1267.48	11.5891	1.59493	Group of diesel engines in the power plant
21035	GABON	PORT GENTIL PERENCO	105	3923	411915	NG	Brayton	Gas Turbine	No cooling	NA	Natural Gas	NA	662689	530151	8.78151	-0.719328	Brayton turbines. No cooling. River nearby. https://hawilti.com/energy/gastopower/gabon-signs-concession-agreement-for-new-120-mw-gas-to-power-plant/
21036	GABON	PORT-GENTIL	16.5	1129	18628.5	Oil	ICE	Diesel-Engines	Dry cooling	Air	HFO	NA	6035.63	4224.94	8.75542	-0.756533	Coast
21037	GABON	PORT-GENTIL REFINERY	51.8	1129	58482.2	Oil	ICE	Diesel-Engines	Dry cooling	Air	HFO	NA	18948.2	13263.8	8.77514	-0.68207	Group of diesel engines for the refinery
21038	GABON	POUBARA	37.76	4826.8	182260	Hydropower	Dammed	NA	NA	NA	NA	NA	146459	146459	13.5515	-1.76216	Reservoir, in combination with Grand Poubara
21039	GABON	RABI KOUNGA FIELD	15.51	3923	60845.7	NG	Brayton	Gas Turbine	No cooling	NA	HFO	NA	97888.6	78310.9	9.91322	-1.54872	Oil field, so probably HFO. Near lake. The size and fuel makes me think is a GT
21040	GABON	TCHIBANGA	1.568	1129	1770.27	Oil	ICE	Diesel-Engines	Dry cooling	Air	Diesel	NA	573.568	401.497	11.0333	-2.85	By the size and fuel, it must be a small MCI generator
21041	GABON	TCHIMBELE	68.4	4826.8	330153	Hydropower	Dammed	NA	NA	NA	NA	NA	0	0	10.407	0.621	Reservoir
22001	GAMBIA	BANSANG	0.9	3941	3546.9	Oil	ICE	Diesel-Engines	Dry cooling	Air	Diesel	NA	1149.19	804.436	-14.65	13.4333	By the size and fuel, it must be a small MCI generator
22002	GAMBIA	BASSE REGION	2.7	3941	10640.7	Oil	ICE	Diesel-Engines	Dry cooling	Air	Diesel	NA	3447.58	2413.31	-14.2192	13.3094	Cannot find it, but considering its size and location assumed is an ICE
22003	GAMBIA	BATAKUNKU VILLAGE	0.15	83.3	12.495	Wind	Wind turbine	Onshore	No cooling	NA	NA	NA	1.65546e-06	1.65546e-06	-16.8021	13.3336	Wind farm
22004	GAMBIA	BRIKAMA GEG	38.4	3941	151334	Oil	ICE	Diesel-Engines	Dry cooling	Air	Diesel, HFO	NA	49032.3	34322.6	-16.6345	13.2951	ICE with cooling racks. https://openinframap.org/stats/area/Gambia/plants http://www.globalpowersystems.eu/en/project-detail/brikama-power-plant-ipp-phase-1-2006-2007/
22005	GAMBIA	BRIKAMA NAWEC	17.8	3941	70149.8	Oil	ICE	Diesel-Engines	Dry cooling	Air	Diesel, HFO	NA	22728.5	15910	-16.6356	13.2928	ICE with cooling racks. https://openinframap.org/stats/area/Gambia/plants http://www.globalpowersystems.eu/en/project-detail/brikama-power-plant-ipp-phase-1-2006-2007/
22006	GAMBIA	ESSAU	0.58	3941	2285.78	Oil	ICE	Diesel-Engines	Dry cooling	Air	Diesel	NA	740.592	518.414	-16.5172	13.4786	By the size and fuel, it must be a small MCI generator
22007	GAMBIA	FARAFENNI	2.4	3941	9458.4	Oil	ICE	Diesel-Engines	Dry cooling	Air	Diesel	NA	3064.52	2145.16	-15.6	13.5667	Cannot find it, but considering its size and location assumed is an ICE
22008	GAMBIA	JANJANBUREH	0.27	3941	1064.07	Oil	ICE	Diesel-Engines	Dry cooling	Air	Diesel	NA	344.758	241.331	-14.7667	13.5333	By the size and fuel, it must be a small MCI generator
22009	GAMBIA	KAUR GROUNDNUT	0.022	3941	86.702	Oil	ICE	Diesel-Engines	Dry cooling	Air	Diesel	NA	28.0914	19.664	-15.3336	13.7101	Hospital. No water. By its size and fuel I assume it is an ICE with diesel
22010	GAMBIA	KAUR NAWEC	0.22	3941	867.02	Oil	ICE	Diesel-Engines	Dry cooling	Air	Diesel	NA	280.914	196.64	-15.3509	13.6966	By the size and fuel, it must be a small MCI generator
22011	GAMBIA	KEREWAN	0.9	3941	3546.9	Oil	ICE	Diesel-Engines	Dry cooling	Air	Diesel	NA	1149.19	804.436	-16.0888	13.4898	By the size and fuel, it must be a small MCI generator
22012	GAMBIA	KOTU	41.4	3941	163157	Oil	ICE	Diesel-Engines	Dry cooling	Air	Diesel	NA	52863	37004.1	-16.6961	13.4542	ICE with cooling racks. Coast. https://openinframap.org/stats/area/Gambia/plants
22013	GAMBIA	LEMON CREEK HOTEL RESORT	0.067	1591	106.597	Sun	PV	Land	No cooling	NA	Flat	Aw - Tropical Savannah	10.4914	7.34395	-16.7354	13.4183	Forest.
22014	GAMBIA	TANJI	0.9	83.3	74.97	Wind	Wind turbine	Onshore	No cooling	NA	NA	NA	9.93273e-06	9.93273e-06	-16.7883	13.3486	Wind farm
23001	GHANA	ADA FOAH TIDAL	0.4	3510.7	1404.28	Hydropower	NA	NA	NA	NA	NA	NA	0	0	0.618048	5.77969	Wave energy, in sea. Operational 2016
23002	GHANA	AKOSOMBO	1038	3510.7	3.64411e+06	Hydropower	Dammed	NA	NA	NA	NA	NA	7.50287e+09	7.50287e+09	0.0594	6.2998	Reservoir
23003	GHANA	AMANDI ENERGY	203	2439	495117	NG	Combined	Combined Cycle (CC)	Dry cooling	Air	Natural Gas, HFO, Diesel	NA	18742.2	13119.6	-1.66739	4.9682	Coast. Combined cycle. Operational in 2019. http://aelgh.com/overview/. It takes the water from a nearby water source, but it is freshwater. https://www.gem.wiki/Amandi_power_station
23004	GHANA	Asanko Gold mine	20	2439	48780	Oil	ICE	Diesel-Engines	Dry cooling	Air	Diesel	NA	15804.7	11063.3	-2.00644	6.33916	Internal combustion. https://s24.q4cdn.com/325379252/files/doc_presentations/2015/2015-05-14_P1_AGMSV.pdf
23005	GHANA	AXIM/ADEISO	0.128	2439	312.192	Oil	ICE	Diesel-Engines	Dry cooling	Air	Diesel	NA	101.15	70.8051	-2.24046	4.86992	By the size and fuel, it must be a small MCI generator
23006	GHANA	BANEAH	5	2943.5	14717.5	Hydropower	Dammed	NA	NA	NA	NA	NA	2.37704e+07	2.37704e+07	-12.863	10.0407	ROR
23007	GHANA	BENSO OIL PALM	0.5	1652.3	826.15	Biomass	Rankine	Steam Turbine	No cooling	NA	Palm Oil	NA	134.028	93.8195	-1.91461	5.10849	Condense steam by the process, do not require cooling towers. https://www.researchgate.net/publication/321880463_Palm_biomass_waste_as_supplementary_source_of_electricity_generation_in_Ghana_Case_of_the_Juaben_Oil_Mills/figures?lo=1
23008	GHANA	BRIDGE POWER	202	2439	492678	NG	Combined	Combined Cycle (CC)	Dry cooling	Air	Natural Gas, LPG	NA	18649.9	13054.9	0.0302354	5.73481	Coast. Operational in 2020
23009	GHANA	BUI DAM	403	3510.7	1.41481e+06	Hydropower	Dammed	NA	NA	NA	NA	NA	2.55883e+08	2.55883e+08	-2.1661	8.1822	Reservoir
23010	GHANA	BURMA CAMP BASE	8.8	2439	21463.2	Oil	ICE	Diesel-Engines	Dry cooling	Air	Diesel	NA	6954.07	4867.85	-0.170388	5.6122	Diesel engines for the Military base (and airport)
23011	GHANA	BURMA CAMP HOSPITAL	4.4	2439	10731.6	Oil	ICE	Diesel-Engines	Dry cooling	Air	Diesel	NA	3477.04	2433.92	-0.196896	5.55602	Diesel generators for the military base in Accra
23012	GHANA	CHIRANO MINE IGCC	2.5	1652.3	4130.75	Biomass	Combined	GT+HeatRecovery	Wet Tower	Freshwater	Wood and coal	Aw - Tropical Savannah	11883.8	4221.88	-2.3732	6.29168	Pond next to it. IGCC. Cooling tower. Wood + Coal
23013	GHANA	CHIRANO MINE IGCC	30	1652.3	49569	Coal	Combined	Steam Turbine	Wet Tower	Freshwater	IGCC	Aw - Tropical Savannah	99073.4	78433.1	-2.37329	6.29164	Pond next to it. Integrated gasification combined cycle
23014	GHANA	DAMANG GOLD MINE	17.6	2439	42926.4	NG	Brayton	Gas Turbine	No cooling	NA	Natural Gas	NA	69060	55248	-1.84912	5.52274	Gas turbines for the mine. https://www.genserenergy.com/operations/ghana/damang-plant/
23015	GHANA	GOMOA ONYADZE	20	1590.9	31818	Sun	PV	Land	No cooling	NA	Flat	Aw - Tropical Savannah	3131.55	2192.09	-0.703554	5.34501	Semi-Arid. Operational in 2018
23016	GHANA	KETE KRACHI	0.25	2439	609.75	Oil	ICE	Diesel-Engines	Dry cooling	Air	Diesel	NA	197.559	138.291	-0.0498	7.79391	By the size and fuel, it must be a small MCI generator
23017	GHANA	KPONE CENPOWER	350	2439	853650	Oil	Combined	Combined Cycle (CC)	Once through	Freshwater	HFO, Natural Gas	Aw - Tropical Savannah	6.46283e+07	355456	0.0513246	5.69313	Coast. Combined cycle gas turbine. Operational in 2019. https://www.cenpowergen.com/ https://www.gem.wiki/Kpone_IPP_(KIPP)_power_station I am not sure if they are using once through cooling as there are no indications in the images of inlets and outlets of water from the nearby river. Nonetheless, I do not see any other type of cooling
23018	GHANA	KPONE VRA	220	2439	536580	NG	Brayton	Gas Turbine	No cooling	NA	Natural Gas	NA	863250	690600	0.00926	5.73462	Coast. Operational in 2016. VRA is Volta River Authority. https://www.gem.wiki/Kpone_Thermal_power_plant
23019	GHANA	KPONG	160	3510.7	561712	Hydropower	Dammed	NA	NA	NA	NA	NA	0	0	0.1255	6.1201	ROR
23020	GHANA	KUMASI MILL	0.384	1652.3	634.483	Biomass	Rankine	Steam Turbine	No cooling	NA	Wood	NA	102.933	72.0534	-1.62443	6.68848	Wood company. Wood residues. No cooling. Near the city
23021	GHANA	KWAE ESTATE	2.5	1652.3	4130.75	Biomass	Rankine	Steam Turbine	No cooling	NA	Palm Oil	NA	670.14	469.098	-0.911579	6.1211	Condense steam by the process, do not require cooling towers. Superheated steam. https://www.gopdc-ltd.com/industrial-facilities/
23022	GHANA	NAVRONGO	2.5	1590.9	3977.25	Sun	PV	Land	No cooling	NA	Flat	Aw - Tropical Savannah	391.444	274.011	-1.05521	10.9236	Semi-arid. https://vra.com/our_mandate/solar_energy.php
23023	GHANA	NSUTA-WASSAW BIOMASS	2	1652.3	3304.6	Biomass	ICE	Gas-Engines	Dry cooling	Air	Biogas - Gasifier	NA	1070.69	749.483	-1.97517	5.28651	Lake nearby. gasification of biomass plant (Generators too small to be visible!). https://africabusinesscommunities.com/news/clenergen_signs_agreement_with_ghana_manganese_company_for_biomass_power_plant.html
23024	GHANA	NSUTA-WASSAW MINE	0.76	2439	1853.64	Oil	ICE	Diesel-Engines	Dry cooling	Air	Diesel	NA	600.579	420.405	-1.95703	5.28746	By the size and fuel, it must be a small MCI generator
23025	GHANA	NYAKROM HIGH SCHOOL	0.009	1000	9	Sun	PV	Rooftop	No cooling	NA	Flat	Aw - Tropical Savannah	0.126054	0.0882379	-0.880623	5.6333	City. I cannot see it, but for its size I assume is rooftop
23026	GHANA	OBATAN MINE	6	2439	14634	Oil	ICE	Diesel-Engines	Dry cooling	Air	Diesel	NA	4741.41	3318.99	-1.02851	6.34183	Diesel engines of the mine
23027	GHANA	POWERSHIP GHANA-2	450	2439	1097550	NG	ICE	Gas-Engines	Once through	Saline	Natural Gas, HFO	NA	355606	248924	-1.69652	4.93835	Powership. Operating in 2019. Combined cycle internal combustion plant. https://www.power-technology.com/data-insights/power-plant-profile-karadeniz-powership-osman-khan-ghana-ghana/ https://www.gem.wiki/Karpowership_(Ghana)_Osman_Khan_power_station This is not a conventional combined cycle. Instead of the turbine, there are ICE, then the heat recovery
23028	GHANA	SAMREBOI MILL	2.8	1652.3	4626.44	Biomass	Rankine	Steam Turbine	No cooling	NA	Wood	NA	750.556	525.389	-2.56328	5.61271	Wood company. Wood residues. No cooling.
23029	GHANA	ST MARTIN PORRES HOSPITAL	0.038	2439	92.682	Oil	ICE	Diesel-Engines	Dry cooling	Air	Diesel	NA	30.0289	21.0203	-0.11207	6.36515	Coast
23030	GHANA	SUNON ASOGLI (KPONE)	560	2439	1365840	NG	Combined	Combined Cycle (CC)	Wet Tower	Freshwater	Natural Gas	Aw - Tropical Savannah	3.9294e+06	1.39597e+06	0.04705	5.6803	Combined cycle with gas turbine and heat recovery. For the recovery they use forced flow cooling towers. Operational in 2018. https://www.gem.wiki/Sunon_Asogli_power_station
23031	GHANA	SWEDRU MUNICIPAL HOSPITAL	0.08	2439	195.12	Oil	ICE	Diesel-Engines	Dry cooling	Air	Diesel	NA	63.2188	44.2532	-0.705779	5.52982	By the size and fuel, it must be a small MCI generator
23032	GHANA	TAKORADI RENTAL (Ameri)	250	2439	609750	NG	Brayton	Gas Turbine	No cooling	NA	Natural Gas	NA	980966	784773	-1.66034	4.97425	Coast. Small gas turbines. Movile Units. https://www.power-technology.com/data-insights/power-plant-profile-ameri-aboadze-power-plant-ghana/?cf-view
23033	GHANA	TAKORADI-T1 (TAPCO)	330	2439	804870	NG	Combined	Combined Cycle (CC)	Wet Tower	Freshwater	Natural Gas, HFO	Aw - Tropical Savannah	2.31554e+06	822626	-1.65828	4.97186	Coast. Combined cycle. https://www.gem.wiki/Takoradi_(TAPCO)_1_Thermal_power_plant. It takes the water from a nearby water source, but it is freshwater
23034	GHANA	TAKORADI-T2 (TICO)	320	2439	780480	NG	Combined	Combined Cycle (CC)	Once through	Freshwater	Natural Gas, HFO	Aw - Tropical Savannah	5.90888e+07	324988	-1.65977	4.97163	Coast. Combined cycle. It takes the water from a nearby water source, but it is freshwater. https://www.gem.wiki/Takoradi_(TICO)_Thermal_power_plant
23035	GHANA	TAKORADI-T3 (TAPCO)	132	2439	321948	NG	Combined	Combined Cycle (CC)	Wet tower	Freshwater	Natural Gas, HFO	Aw - Tropical Savannah	926216	329051	-1.75	4.88333	Coast. Combined cycle. https://www.gem.wiki/Takoradi_(TAPCO)_3_Thermal_power_plant
23036	GHANA	TEMA CENIT	110	2439	268290	NG	Brayton	Gas Turbine	No cooling	NA	Natural Gas, HFO	NA	431625	345300	0.01224	5.67446	Brayton https://www.gem.wiki/Tema_CENIT_Thermal_power_plant_(TCTPP)
23037	GHANA	TEMA REFINERY	10.1	2439	24633.9	NG	Brayton	Gas Turbine	No cooling	NA	Natural Gas	NA	39631	31704.8	0.007328	5.66966	Gas turbines for the Refinery
23038	GHANA	TEMA UNILEVER	5.2	2439	12682.8	NG	Brayton	Gas Turbine	No cooling	NA	Natural Gas	NA	20404.1	16323.3	0.00920167	5.647	One gas turbine in the Unilever Industrial Complex. Combined heat and power. https://www.ghanabusinessnews.com/2012/07/08/unilever-commissions-17-5m-combined-heat-and-power-plant/
23039	GHANA	TEMA VRA-1	75	2439	182925	Oil	ICE	Diesel-Engines	Dry cooling	Air	Diesel, HFO	NA	59267.7	41487.4	0.0136569	5.67766	Diesel generators (movable units). https://www.vra.com/our_mandate/tema_thermal_power_complex.php
23040	GHANA	TETTEH QUARSHIE HOSPITAL	0.4	2439	975.6	Oil	ICE	Diesel-Engines	Dry cooling	Air	Diesel	NA	316.094	221.266	-1.4	7.05314	By the size and fuel, it must be a small MCI generator
23041	GHANA	TSATSADU	0.045	3510.7	157.981	Hydropower	ROR	NA	NA	NA	NA	NA	0	0	0.387554	7.16528	ROR (very small)
23042	GHANA	TWIFO OIL PALM	0.6	1652.3	991.38	Biomass	Rankine	Steam Turbine	No cooling	NA	Palm Oil	NA	160.833	112.583	-1.54368	5.54296	Condense steam by the process, do not require cooling towers. Near river. https://www.findpower.com/list-of-power-plants-in-ghana-/
23043	GHANA	VPOWER TEMA	50	2439	121950	NG	Brayton	Gas Turbine	No cooling	NA	Natural Gas	NA	196193	156955	0.0138894	5.67745	Brayton, air cooling
23044	GHANA	WASSA MINE	48	2439	117072	Oil	ICE	Diesel-Engines	Dry cooling	Air	Diesel	NA	37931.3	26551.9	-1.71598	5.48619	Group of diesel engines in the Gold mine
24001	GUINEA	BOKE	2.5	1360	3400	Oil	ICE	Diesel-Engines	Dry cooling	Air	Diesel	NA	1101.6	771.119	-14.3	10.9333	I cannot find, but considering its size, fuel and the name of the power plant it is very likely that is a group of diesel engines for a factory near Boké
24002	GUINEA	CONAKRY CEMENT PLANT	6	1360	8160	Oil	ICE	Diesel-Engines	Dry cooling	Air	Diesel	NA	2643.84	1850.69	-13.496	9.72363	Diesel engines for the Cement plant
24003	GUINEA	CONAKRY EDG	0.6	1360	816	Oil	ICE	Diesel-Engines	Dry cooling	Air	Diesel	NA	264.384	185.069	-13.6773	9.53795	By the size and fuel, it must be a small MCI generator
24004	GUINEA	CONAKRY RENTAL (Te-Power)	50	1360	68000	Oil	ICE	Diesel-Engines	Dry cooling	Air	HFO	NA	22032	15422.4	-13.6038	9.60173	Coast. Diesel engine. This power plant must be Te-power. Operational in 2019
24005	GUINEA	DONKEA	15	2943.5	44152.5	Hydropower	Dammed	NA	NA	NA	NA	NA	1.57729e+06	1.57729e+06	-12.995	9.95	Reservoir
24006	GUINEA	FARANAH	3	1360	4080	Oil	ICE	Diesel-Engines	Dry cooling	Air	Diesel	NA	1321.92	925.343	-10.7381	10.0582	I cannot find, but considering its size, fuel and the name of the power plant it is very likely that is a group of diesel engines for a factory near Faranah
24007	GUINEA	FRIGUIA REFINERY	52.2	1360	70992	Oil	ICE	Diesel-Engines	Dry cooling	Air	HFO	NA	23001.4	16101	-13.5797	10.3884	Part of the refinery. Even when the satellite shows a cooling tower, the images show that it has not been used for a while
24008	GUINEA	GAOUAL	1	1360	1360	Oil	ICE	Diesel-Engines	Dry cooling	Air	Diesel	NA	440.64	308.448	-13.2004	11.7624	Hospital. Assumed Diesel generator due to its size and fuel.
24009	GUINEA	GARAFIRI	75.45	2943.5	222087	Hydropower	Dammed	NA	NA	NA	NA	NA	5.57349e+07	5.57349e+07	-12.6635	10.5283	Reservoir
24010	GUINEA	GRANDES-CHUTES	28.32	3138.9	88893.6	Hydropower	Dammed	NA	NA	NA	NA	NA	30217.4	30217.4	-13.0986	9.92111	Reservoir
24011	GUINEA	GUECKEDOU	2	1360	2720	Oil	ICE	Diesel-Engines	Dry cooling	Air	Diesel	NA	881.279	616.896	-10.1311	8.56497	By its size and fuel I assume it is an ICE with diesel
24012	GUINEA	KALETA	240	2943.5	706440	Hydropower	Dammed	NA	NA	NA	NA	NA	2.70405e+06	2.70405e+06	-13.2765	10.4627	Reservoir. Operational in 2015
24013	GUINEA	KAMSAR-1	24	1360	32640	Oil	ICE	Diesel-Engines	Dry cooling	Air	Diesel	NA	10575.4	7402.75	-14.6132	10.646	Power plant in the factory. Operational in 2018. https://imm.energy/en/portfolio-item/kamsar-guinea-conakry/
24014	GUINEA	KAMSAR-2	3	1360	4080	Oil	ICE	Diesel-Engines	Dry cooling	Air	Diesel	NA	1321.92	925.343	-14.6126	10.6465	Smaller power plant in the factory, next to Kamsar-1. https://imm.energy/en/portfolio-item/kamsar-guinea-conakry/
24015	GUINEA	Karpowership	125	1360	170000	Oil	ICE	Diesel-Engines	Dry cooling	Air	HFO	NA	55080	38556	-13.7154	9.51839	Operational in February 2020 until early 2023. https://www.facebook.com/globaltimesonline/photos/karpower-goes-to-guineakarpowership-a-member-of-karadeniz-energy-group-istanbul-/2554514474677200/
24016	GUINEA	KINKON	3.5	2943.5	10302.2	Hydropower	Dammed	NA	NA	NA	NA	NA	0	0	-12.3979	11.0575	ROR
24017	GUINEA	KIPE POWER	50	1360	68000	Oil	ICE	Diesel-Engines	Dry cooling	Air	HFO	NA	22032	15422.4	-13.636	9.60268	MAN diesel engines running on HFO. Operating since 2016. Before on site were movable diesel engines https://iltekno.com/iltekno-signed-technical-consultancy-services-tcs-contract/ https://en.wikipedia.org/wiki/List_of_power_stations_in_Guinea
24018	GUINEA	LA LOFFA	0.2	2943.5	588.7	Hydropower	ROR	NA	NA	NA	NA	NA	0	0	-9.47311	8.54143	ROR
24019	GUINEA	LEFA CORRIDOR	36	1360	48960	Oil	ICE	Diesel-Engines	Dry cooling	Air	Diesel	NA	15863	11104.1	-10.048	11.7505	Diesel engines for the mine
24020	GUINEA	SANGAREDI	23.77	1360	32327.2	Oil	ICE	Diesel-Engines	Dry cooling	Air	Diesel	NA	10474	7331.8	-13.7956	11.1018	Bauxiet mine, no water
24021	GUINEA	SIGUIRI MINE	30	1360	40800	Oil	ICE	Diesel-Engines	Dry cooling	Air	Diesel	NA	13219.2	9253.43	-9.39055	11.5685	Diesel engines for the mine
24022	GUINEA	SOGUIPAH	3.2	1360	4352	Oil	ICE	Diesel-Engines	Dry cooling	Air	Diesel	NA	1410.05	987.033	-8.97476	7.34144	Group of diesel generators inside the Soguipah factory.
24023	GUINEA	TINKISSO	15	235.5	3532.5	Hydropower	ROR	NA	NA	NA	NA	NA	39060.4	39060.4	-11.1167	10.75	ROR https://database.earth/energy/power-plant/tinkisso
24024	GUINEA	TOMBO (Kaloum)	126.5	1360	172040	Oil	ICE	Diesel-Engines	Dry cooling	Air	HFO	NA	55740.9	39018.6	-13.7122	9.50917	Kaloum 1,2,3,4, all based on diesel engines with cooling racks. https://en.wikipedia.org/wiki/List_of_power_stations_in_Guinea https://www.wartsila.com/energy/learn-more/references/utilities/kaloum-5-republic-of-guinea
25001	GUINEA-BISSAU	BAMBADINCA STA CLARO	0.3	1155	346.5	Oil	ICE	Diesel-Engines	Dry cooling	Air	Diesel	NA	112.266	78.5861	-14.8922	11.9882	By the size and fuel, it must be a small MCI generator
25002	GUINEA-BISSAU	BAMBADINCA STA CLARO	10	1528	15280	Sun	PV	Land	No cooling	NA	Flat	Aw - Tropical Savannah	1503.87	1052.71	-14.8554	12.017	Forest. https://www.clarke-energy.com/2015/tropical-power-launches-energy-park/
25003	GUINEA-BISSAU	BISSAU	15	1155	17325	Oil	ICE	Diesel-Engines	Dry cooling	Air	Diesel	NA	5613.3	3929.31	-15.5871	11.8533	Small site where the diesel engines are located. Total installed capacity in 2019 was 15 MW. https://country.eiu.com/article.aspx?articleid=1077685691&Country=Guinea-Bissau&topic=Economy&subtopic=Forecast&subsubtopic=Policy+trends
25004	GUINEA-BISSAU	CICER BREWERY	1.528	1155	1764.84	Oil	ICE	Diesel-Engines	Dry cooling	Air	Diesel	NA	571.808	400.265	-15.5909	11.8387	ICE in the factory. By its size and location is a diesel engine
25005	GUINEA-BISSAU	KARPOWERSHIP	35	1155	40425	Oil	ICE	Diesel-Engines	Dry cooling	Air	Diesel	NA	13097.7	9168.38	-15.58	11.8483	Boat providing electricity. Operational 2019. https://www.karpowership.com/project-guinea-bissau https://country.eiu.com/article.aspx?articleid=1077685691&Country=Guinea-Bissau&topic=Economy&subtopic=Forecast&subsubtopic=Policy+trends
26001	KENYA	AHP CENTRAL	0.338	1916	647.608	Oil	ICE	Diesel-Engines	Dry cooling	Air	Diesel	NA	209.825	146.877	35.2831	-0.367744	By the size and fuel, it must be a small MCI generator
26002	KENYA	ATHI RIVER GULF	80	1916	153280	Oil	ICE	Diesel-Engines	Dry cooling	Air	HFO	NA	49662.7	34763.9	37.0042	-1.45881	Dry cooling, fans. https://www.gem.wiki/Athi_River_power_station
26003	KENYA	ATHI TRIUMPH	90	1916	172440	Oil	ICE	Diesel-Engines	Dry cooling	Air	HFO	NA	55870.5	39109.4	36.9536	-1.46112	Diesel engines working with HFO. https://www.gem.wiki/Athi_Triumph_power_station
26004	KENYA	BARICHO WATERWORKS	90	1528	137520	Sun	PV	Rooftop	No cooling	NA	Flat	Aw - Tropical Savannah	1926.11	1348.28	39.7833	-3.1	Estimated value. I cannot find it. Due to its size I assume that it is a rooftop and agricultural Land.
26005	KENYA	BATIAN FLOWER FARM	0.234	1528	357.552	Sun	PV	Rooftop	No cooling	NA	Flat	Aw - Tropical Savannah	5.00788	3.50552	37.2862	0.0761224	Agricultural Land. https://nvisionenergy.com/
26006	KENYA	BLACK PETALS FLOWER FARM	0.175	1528	267.4	Sun	PV	Rooftop	No cooling	NA	Flat	Cfb - Temperate Without dry Season	1.01222	0.708553	36.7449	-1.14212	Agricultural Land. https://nvisionenergy.com/
26007	KENYA	BOMET	2.4	4311.8	10348.3	Hydropower	ROR	NA	NA	NA	NA	NA	0	0	35.3391	-0.785561	Ready in 2017. https://www.enco.energy/portfolio/iria-maina-hydropower-plant/
26008	KENYA	BUTALI MILL	12	2211	26532	Biomass	Rankine	Steam Turbine	No cooling	NA	Sugarcane	NA	4304.34	3013.04	34.8377	0.487292	No cooling. CHP. Installed around 2014. https://www.standardmedia.co.ke/western/article/2000098930/butali-sugar-company-eyes-more-revenue-with-12-megawatts-power-project
26009	KENYA	CHANGANA	0.225	1916	431.1	Oil	ICE	Diesel-Engines	Dry cooling	Air	Diesel	NA	139.676	97.7734	35.2979	-0.453838	Tea factory of Finlays
26010	KENYA	CHEMAMUL	0.378	4311.8	1629.86	Hydropower	ROR	NA	NA	NA	NA	NA	0	0	35.1187	-0.683333	ROR. Tea factory
26011	KENYA	CHEMELIL SUGAR	26	2211	57486	Biomass	Rankine	Steam Turbine	No cooling	NA	Sugarcane	NA	9326.06	6528.25	35.1319	-0.081475	No cooling. https://nation.africa/kenya/business/chemelil-set-to-build-power-plant-in-2-years-643096
26012	KENYA	CHEMELIL SUGAR	5.5	2211	12160.5	Biomass	Rankine	Steam Turbine	No cooling	NA	Sugarcane	NA	1972.82	1380.97	35.1374	-0.079632	No cooling. CHP
26013	KENYA	CHEMOSIT	1.3	4311.8	5605.34	Hydropower	Dammed	NA	NA	NA	NA	NA	0	0	35.2831	-0.367744	Reservoir with a tunnel to the power station. This is withdrawal. https://www.kenyanews.go.ke/chemosit-residents-calls-for-halting-of-ktdas-setet-hydro-power-project/
26014	KENYA	DANCO PLASTICS	0.9	1528	1375.2	Sun	PV	Rooftop	No cooling	NA	Flat	Cfb - Temperate Without dry Season	5.2057	3.64399	36.96	-1.14976	City. https://nvisionenergy.com/
26015	KENYA	DIMBOLIL	0.374	4311.8	1612.61	Hydropower	ROR	NA	NA	NA	NA	NA	0	0	35.2831	-0.367744	ROR
26016	KENYA	EBURRU	2.5	6747.4	16868.5	Geo	Geothermal	Steam Turbine	Wet Tower	Freshwater	Flash	Csb - Temperate Dry Summer	1149.38	702.396	36.2489	-0.641157	One small cooling tower
26017	KENYA	ECO ROSES FLOWER FARM	0.3	1528	458.4	Sun	PV	Rooftop	No cooling	NA	Flat	Aw - Tropical Savannah	6.42036	4.49425	35.8513	-0.219955	Agricultural Land. https://nvisionenergy.com/
26018	KENYA	ELDORET MILL (Rupa, textiles)	4.2	2211	9286.2	Biomass	Rankine	Steam Turbine	No cooling	NA	Cotton	NA	1506.52	1054.56	35.2833	0.516667	Power plant used by the mill
26019	KENYA	ELDOSOL	40	1528	61120	Sun	PV	Land	No cooling	NA	Flat	Aw - Tropical Savannah	6015.47	4210.83	35.3596	0.415415	Semi-Arid
26020	KENYA	FAZA ISLAND	0.4	1916	766.4	Oil	ICE	Diesel-Engines	Dry cooling	Air	Diesel	NA	248.313	173.819	41.06	-2.10904	By the size and fuel, it must be a small MCI generator
26021	KENYA	GARDEN CITY MALL	1.2	1528	1833.6	Sun	PV	Rooftop	No cooling	NA	Flat	Cfb - Temperate Without dry Season	6.94093	4.85865	36.8795	-1.23359	City
26022	KENYA	GARISSA	10	1916	19160	Oil	ICE	Diesel-Engines	Dry cooling	Air	Diesel	NA	6207.84	4345.48	39.6375	-0.445142	Location looks abandoned in Google Maps. The latest picture of the street 2021, shows that the place is indeed abandoned, but I do not know if this was still the case for 2020 https://www.ketraco.co.ke/information-center/media-center/news/garissa-finally-joins-national-grid
26023	KENYA	GARISSA SOLAR	55	1528	84040	Sun	PV	Land	No cooling	NA	Flat	BWh - Desert Hot	8271.28	5789.89	39.6008	-0.34	Desert. Operational in 2018. https://en.wikipedia.org/wiki/Garissa_Solar_Power_Station
26024	KENYA	GITARU	225	4311.8	970155	Hydropower	Dammed	NA	NA	NA	NA	NA	1.9006e+06	1.9006e+06	37.675	-0.6417	Reservoir
26025	KENYA	GOGO	1	4311.8	4311.8	Hydropower	ROR	NA	NA	NA	NA	NA	9700.49	9700.49	34.4333	-1.08333	ROR. Study to upgrade to 8 MW. https://www.hydroprojekt.de/en/news/news-message/article/expansion-of-the-gogo-hydropower-plant-in-kenya/
26026	KENYA	GOLDEN TULIP FLOWER FARM	0.06	1528	91.68	Sun	PV	Rooftop	No cooling	NA	Flat	Csb - Temperate Dry Summer	0.347047	0.242933	36.4269	-0.256472	Agricultural Land. https://nvisionenergy.com/
26027	KENYA	GORGE FARM	2.8	2211	6190.8	Biomass	ICE	Gas-Engines	Dry cooling	Air	Biogas - Anaerobic Digester	NA	2005.82	1404.07	36.431	-0.717178	Biogas obtained from a Anaerobic Digester. Near lake Naivasha. Biogas for electricity. https://www.kenyacic.org/2017/08/study-tour-to-gorge-park-energy-farm-and-solinc-east-africa/
26028	KENYA	GROVE FLOWERS	0.075	1528	114.6	Sun	PV	Land	No cooling	NA	Flat	Csb - Temperate Dry Summer	2.60285	1.82199	36.302	-0.715781	Agricultural Land. https://nvisionenergy.com/
26029	KENYA	GUCHA OGEMBO	12	4311.8	51741.6	Hydropower	ROR	NA	NA	NA	NA	NA	17991.1	17991.1	34.1333	-0.933333	https://en.wikipedia.org/wiki/Gucha_River
26030	KENYA	GURA	6	4311.8	25870.8	Hydropower	ROR	NA	NA	NA	NA	NA	0	0	36.9502	-0.429598	ROR. https://cog.go.ke/index.php/newsmed/new/495-kisumu-vihiga-county-devolutiontorch-handover
26031	KENYA	ICIPE DUDUVILLE	0.578	1528	883.184	Sun	PV	Rooftop	No cooling	NA	Flat	Cfb - Temperate Without dry Season	3.34322	2.34025	36.8967	-1.22193	City.
26032	KENYA	ICIPE ODHIAMBO	0.578	1528	883.184	Sun	PV	Rooftop	No cooling	NA	Flat	Af - Tropical Rainforest	12.3699	8.65893	34.206	-0.436791	City.
26033	KENYA	IKNIU	0.001	4311.8	4.3118	Hydropower	ROR	NA	NA	NA	NA	NA	0	0	36.8333	-1.16667	ROR
26034	KENYA	IMENTI Tea factory	0.92	4311.8	3966.86	Hydropower	ROR	NA	NA	NA	NA	NA	0	0	37.7007	-0.071338	ROR
26035	KENYA	JAMIJI	0.626	4311.8	2699.19	Hydropower	Dammed	NA	NA	NA	NA	NA	36113.2	36113.2	35.2831	-0.367744	ROR
26036	KENYA	JAMIJI	1.2	1916	2299.2	Oil	ICE	Diesel-Engines	Dry cooling	Air	Diesel	NA	744.94	521.458	35.2831	-0.367744	City centre Kericho. Assumed Diesel generator due to its size and fuel.
26037	KENYA	KAHAWA WEST	0.05	2318	115.9	Wind	Wind turbine	Onshore	No cooling	NA	NA	NA	1.53555e-05	1.53555e-05	36.8219	-1.29207	Wind farm
26038	KENYA	KAMBURU	93	4311.8	400997	Hydropower	Dammed	NA	NA	NA	NA	NA	0	0	37.625	-0.85	Reservoir
26039	KENYA	KAPCHET TEA	2	2318	4636	Wind	Wind turbine	Onshore	No cooling	NA	NA	NA	0.000614221	0.000614221	35.2831	-0.367744	Wind farm
26040	KENYA	KAPRORET	0.158	4311.8	681.264	Hydropower	ROR	NA	NA	NA	NA	NA	0	0	35.4333	-0.716667	ROR
26041	KENYA	KATHAMBA	0.001	4311.8	4.3118	Hydropower	ROR	NA	NA	NA	NA	NA	0	0	37.2785	-0.499328	ROR
26042	KENYA	KEEKONYOKIE BIOGAS	0.02	2211	44.22	Biomass	ICE	Gas-Engines	Dry cooling	Air	Biogas - Anaerobic Digester	NA	14.3273	10.0291	36.6848	-1.42987	Anaerobic Digestor. Slaughterhouse waste to biogas to electricity. https://nation.africa/kenya/business/enterprise/maasai-clan-s-abattoir-spins-off-thriving-biogas-912594
26043	KENYA	KERENGA	0.42	4311.8	1810.96	Hydropower	ROR	NA	NA	NA	NA	NA	0	0	35.2831	-0.367744	ROR
26044	KENYA	KIAMBERE	165	4311.8	711447	Hydropower	Dammed	NA	NA	NA	NA	NA	0	0	37.8944	-0.7667	Reservoir
26045	KENYA	KIANGOMBE	0.002	4311.8	8.6236	Hydropower	ROR	NA	NA	NA	NA	NA	0	0	37.2803	-0.498865	ROR
26046	KENYA	KIANGURWE	0.24	4311.8	1034.83	Hydropower	ROR	NA	NA	NA	NA	NA	0	0	37.1751	-0.476094	ROR. https://kerea.org/renewables/small-hydro/
26047	KENYA	KILIFI BIOGAS	0.15	2211	331.65	Biomass	ICE	Gas-Engines	Dry cooling	Air	Biogas - Anaerobic Digester	NA	107.455	75.2182	39.8499	-3.63045	Anaerobic Digester (requires freshwater). Cow manure and sisal residues into biogas for electricity. https://energypedia.info/wiki/Biogas_Plant_-_Sisal_cum_Cattle_Farm_in_Kilifi,_Kenya
26048	KENYA	KINDARUMA	72	4311.8	310450	Hydropower	Dammed	NA	NA	NA	NA	NA	8469170	8469170	37.8167	-0.8139	Reservoir
26049	KENYA	KIP brands factory	0.065	1528	99.32	Sun	PV	Rooftop	No cooling	NA	Flat	Cfb - Temperate Without dry Season	0.375967	0.263177	36.8937	-1.32888	City. https://nvisionenergy.com/
26050	KENYA	KIPEVU-I	63	1916	120708	Oil	ICE	Diesel-Engines	Dry cooling	Air	HFO	NA	39109.4	27376.6	39.6354	-4.03966	Dry cooling. Freshwater nearby. https://www.gem.wiki/Kipevu_I_power_station
26051	KENYA	KIPEVU-II TSAVO	75	1916	143700	Oil	ICE	Diesel-Engines	Dry cooling	Air	HFO	NA	46558.8	32591.1	39.6354	-4.03966	Dry cooling, rack of fans. https://www.gem.wiki/Kipevu_II_Tsavo_power_station
26052	KENYA	KIPEVU-III	116.97	1916	224115	Oil	ICE	Diesel-Engines	Dry cooling	Air	HFO	NA	72613	50829.1	39.6335	-4.03805	Dry cooling. Rack of fans. https://www.gem.wiki/Kipevu_III_power_station
26053	KENYA	KITONYONI VILLAGE	0.014	1528	21.392	Sun	PV	Rooftop	No cooling	NA	Flat	BSh - Arid Steppe - Hot	0.299617	0.209732	37.656	-1.9552	Semi-arid.
26054	KENYA	KITUMBE	1.292	1916	2475.47	Oil	ICE	Diesel-Engines	Dry cooling	Air	Diesel	NA	802.052	561.437	35.2614	-0.434333	Tea factory. Assumed Diesel generator due to its size and fuel.
26055	KENYA	KPRL REFINERY	9.2	1916	17627.2	Oil	ICE	Diesel-Engines	Dry cooling	Air	HFO	NA	5711.21	3997.85	39.623	-4.01783	Likely diesel engines for the Refinery
26056	KENYA	KUBALI HERB FARM	0.06	1528	91.68	Sun	PV	Land	No cooling	NA	Flat	Aw - Tropical Savannah	9.02321	6.31625	36.4494	0.216132	Agricultural Land. https://nvisionenergy.com/
26057	KENYA	KWALE SUGAR	18	2211	39798	Biomass	Rankine	Steam Turbine	No cooling	NA	Sugarcane	NA	6456.51	4519.55	39.4813	-4.46529	No cooling. Combined heat and power. https://www.expogr.com/expokenya/detail_news.php?newsid=158&pageid=2
26058	KENYA	KYMULOT	0.448	1916	858.368	Oil	ICE	Diesel-Engines	Dry cooling	Air	Diesel	NA	278.111	194.678	35.2831	-0.367744	By the size and fuel, it must be a small MCI generator
26059	KENYA	LAKE TURKANA WIND	310.25	2318	719160	Wind	Wind turbine	Onshore	No cooling	NA	NA	NA	0.095281	0.095281	36.7932	2.4891	Operational in 2018. https://en.wikipedia.org/wiki/Lake_Turkana_Wind_Power_Station https://www.gem.wiki/Lake_Turkana_wind_farm
26060	KENYA	LAMU	1.156	1916	2214.9	Oil	ICE	Diesel-Engines	Dry cooling	Air	Diesel	NA	717.626	502.338	40.902	-2.27169	Hotel. Assumed Diesel generator due to its size and fuel.
26061	KENYA	LAUREL FLOWER FARM	0.18	1528	275.04	Sun	PV	Rooftop	No cooling	NA	Flat	Csb - Temperate Dry Summer	1.04114	0.728798	36.485	-0.276316	Agricultural Land. https://nvisionenergy.com/
26062	KENYA	LODWAR	2.5	1916	4790	Oil	ICE	Diesel-Engines	Dry cooling	Air	Diesel	NA	1551.96	1086.37	35.5973	3.11911	Cannot find it. Likely a group of diesel generators for the village https://www.kplc.co.ke/content/item/3947/restricted-tender-notice---restricted-tender-notice---for-provision-of-2.5mw-generators-at-lodwar-and-mandera-power-stations
26063	KENYA	LOISABA CONSERVANCY	0.074	1528	113.072	Sun	PV	Land	No cooling	NA	Flat	Aw - Tropical Savannah	11.1286	7.79004	36.8035	0.611231	Semi-arid.
26064	KENYA	LOWER NYAMINDI	1.86	4311.8	8019.95	Hydropower	ROR	NA	NA	NA	NA	NA	1094.16	1094.16	37.3565	-0.492706	Operational in 2016. https://www.andritz.com/hydro-en/hydronews/28/hy-news-28-20-lower-nyamindi-south-mara-hydro
26065	KENYA	MAGADI WORKS	1.843	1916	3531.19	Oil	ICE	Diesel-Engines	Dry cooling	Air	HFO	NA	1144.1	800.873	36.287	-1.89365	Near lake. Tata chemical, soda ash, aims to replace expensive thermal by solar 10MW. https://www.capitalfm.co.ke/business/2023/02/tata-chemicals-magadi-eyes-innovative-climate-smart-solutions-for-growth/
26066	KENYA	MANDERA	2.5	1916	4790	Oil	ICE	Diesel-Engines	Dry cooling	Air	Diesel	NA	1551.96	1086.37	41.867	3.93663	Diesel generators for the Hospital unit
26067	KENYA	MANDERA	0.3	1528	458.4	Sun	PV	Land	No cooling	NA	Flat	BWh - Desert Hot	45.1161	31.5812	41.7992	3.92097	Semi-arid.
26068	KENYA	MARIGAT BIOMASS	12	2211	26532	Biomass	ICE	Gas-Engines	Dry cooling	Air	Biogas - Gasifier	NA	8596.36	6017.45	35.9658	0.465607	Gasification of Prosopis Juliflora a invasive wood species. https://kenyaenergyfuture.wordpress.com/2015/09/16/marigat-biomass-energy-using-the-invasive-prosopis-juliflora-tree/
26069	KENYA	MARSABIT	0.54	1916	1034.64	Oil	ICE	Diesel-Engines	Dry cooling	Air	Diesel	NA	335.223	234.656	37.9899	2.32839	Hospital. By the size and fuel, it must be a small MCI generator
26070	KENYA	MASINGA	40	4311.8	172472	Hydropower	Dammed	NA	NA	NA	NA	NA	1.89512e+08	1.89512e+08	37.5167	-0.9	Reservoir
26071	KENYA	MASOBET	1.11	4311.8	4786.1	Hydropower	ROR	NA	NA	NA	NA	NA	0	0	35.2831	-0.367744	ROR
26072	KENYA	MATAARA CHANIA	0.03	4311.8	129.354	Hydropower	ROR	NA	NA	NA	NA	NA	0	0	36.9051	-1.01306	https://hivisasa.com/posts/---------------------------------------------------mataara-hydro-power-project-receives-kshs-5m-from-national-government----------------------------
26073	KENYA	MAUA AGRITECH FLOWER FARM	0.2	1528	305.6	Sun	PV	Land	No cooling	NA	Flat	Cwb - Temperate Dry Winter	6.94093	4.85865	36.8503	-1.63433	Agricultural Land. https://nvisionenergy.com/ The satellite does not show an update picture of the place
26074	KENYA	MERU IRARU	0.6	4311.8	2587.08	Hydropower	ROR	NA	NA	NA	NA	NA	0	0	34.75	-0.833333	Licence 2014. https://www.epra.go.ke/wp-content/uploads/2022/04/Power-Undertaking-Register-February-2022-00000002.pdf
26075	KENYA	MERU SOUTH MARA	0.03	4311.8	129.354	Hydropower	ROR	NA	NA	NA	NA	NA	0	0	37.8198	-0.316926	ROR
26076	KENYA	MESCO	0.456	4311.8	1966.18	Hydropower	ROR	NA	NA	NA	NA	NA	0	0	37.1333	-0.8	ROR
26077	KENYA	METUMI N MATHIOYA	0.4	4311.8	1724.72	Hydropower	ROR	NA	NA	NA	NA	NA	5205.03	5205.03	36.9635	-0.68461	ROR. Operational in 2020. https://www.kenyanews.go.ke/muranga-ktda-factories-roll-out-plan-for-reliable-energy/
26078	KENYA	MOMBASA CAMPUS	0.515	1528	786.92	Sun	PV	Rooftop	No cooling	NA	Flat	Aw - Tropical Savannah	11.0216	7.71513	39.6682	-4.04348	City.
26079	KENYA	MUHORONI SUGAR	3	2211	6633	Biomass	Rankine	Steam Turbine	No cooling	NA	Sugarcane	NA	1076.08	753.259	35.1869	-0.152747	No cooling. CHP https://www.musco.co.ke/factory.html
26080	KENYA	MUHORONI SUGAR	3	1916	5748	Oil	ICE	Diesel-Engines	Dry cooling	Air	Diesel	NA	1862.35	1303.65	35.1868	-0.153017	I cannot identfy any other type of power plant in the sugar plant. Probably is a group of diesel engines used as backup for the factory
26081	KENYA	MUHORONI THERMAL	27	1916	51732	Oil	Brayton	Gas Turbine	No cooling	NA	Diesel	NA	83226.4	66581.2	35.1988	-0.154064	In the data it says it is a group of Internal combustion engines, but on the satellite image I see a gas turbine. The photos of the place also indicate that this is a gas turbine. https://www.gem.wiki/Muhoroni_power_station
26082	KENYA	MUMIAS SUGAR	34	2211	75174	Biomass	Rankine	Steam Turbine	No cooling	NA	Sugarcane	NA	12195.6	8536.94	34.5036	0.362963	No cooling. Combined heat and power. https://www.iwmi.cgiar.org/Publications/Books/PDF/resource_recovery_from_waste-238-247.pdf
26083	KENYA	NAIROBI SOUTH	109	1916	208844	Oil	ICE	Diesel-Engines	Dry cooling	Air	HFO	NA	67665.4	47365.8	36.8838	-1.30142	Racks of cooling fans in the power plant. Likely running on HFO. Operational in 1997. https://en.wikipedia.org/wiki/List_of_power_stations_in_Kenya
26084	KENYA	NDULA	2	4311.8	8623.6	Hydropower	ROR	NA	NA	NA	NA	NA	12338.4	12338.4	37.0693	-1.03326	ROR
26085	KENYA	NELIO FLOWER FARM	0.06	1528	91.68	Sun	PV	Land	No cooling	NA	Flat	Aw - Tropical Savannah	9.02321	6.31625	37.2862	0.0897993	Agricultural Land. https://nvisionenergy.com/
26086	KENYA	NGONG-I	12.75	460.6	5872.65	Wind	Wind turbine	Onshore	No cooling	NA	NA	NA	0.000778064	0.000778064	36.638	-1.3803	Part of the NGONG project. https://www.gem.wiki/Ngong_wind_farm
26087	KENYA	NGONG-II	12.75	460.6	5872.65	Wind	Wind turbine	Onshore	No cooling	NA	NA	NA	0.000778064	0.000778064	36.638	-1.3803	Part of the NGONG project. https://www.gem.wiki/Ngong_wind_farm. Expanded in2015. https://en.wikipedia.org/wiki/Ngong_Hills_Wind_Power_Station
26088	KENYA	NZOIA SUGAR MILL	1.5	2211	3316.5	Biomass	Rankine	Steam Turbine	No cooling	NA	Sugarcane	NA	538.042	376.63	34.6552	0.568601	No cooling. CHP
26089	KENYA	OLKARIA WELLHEAD	80.6	6747.4	543840	Geo	Geothermal	Steam Turbine	Wet Tower	Freshwater	Flash	Csb - Temperate Dry Summer	37055.9	22645.3	36.2892	-0.890467	One small set of cooling towers
26090	KENYA	OLKARIA-I	185	6747.4	1248269	Geo	Geothermal	Steam Turbine	Wet Tower	Freshwater	Flash	Csb - Temperate Dry Summer	85053.8	51977.3	36.3074	-0.892849	A lot of forced flow cooling towers. Mostly Flash https://en.wikipedia.org/wiki/Olkaria_I_Geothermal_Power_Station
26091	KENYA	OLKARIA-II	105	6747.4	708477	Geo	Geothermal	Steam Turbine	Wet Tower	Freshwater	Flash	Csb - Temperate Dry Summer	48273.8	29500.6	36.2991	-0.864407	One large set of forced flow Cooling towers. Mostly Flash. https://www.gem.wiki/Olkaria_2_geothermal_power_plant
26092	KENYA	OLKARIA-III	139	6747.4	937889	Geo	Geothermal	Steam Turbine	Dry cooling	Air	Binary - Dry cooled	NA	1.47084e+06	1.02959e+06	36.2552	-0.889546	A few large sets of cooling racks. https://en.wikipedia.org/wiki/Olkaria_III_Geothermal_Power_Station
26093	KENYA	OLKARIA-IV	140	6747.4	944636	Geo	Geothermal	Steam Turbine	Wet Tower	Freshwater	Flash	Csb - Temperate Dry Summer	64365.1	39334.2	36.3346	-0.91805	Two sets of cooling towers. https://www.gem.wiki/Olkaria_4_geothermal_power_plant
26094	KENYA	OLKARIA-V	158	6747.4	1.06609e+06	Geo	Geothermal	Steam Turbine	Wet Tower	Freshwater	Flash	Csb - Temperate Dry Summer	72640.6	44391.5	36.3509	-0.899503	Two sets of forced flow cooling towers. Operational in 2019. https://en.wikipedia.org/wiki/Olkaria_V_Geothermal_Power_Station. https://www.gem.wiki/Olkaria_5_geothermal_power_plant (the location is wrong in the gem. Wiki)
26095	KENYA	OSERIAN FARM	2.5	6747.4	16868.5	Geo	Geothermal	Steam Turbine	Wet Tower	Freshwater	Flash	Csb - Temperate Dry Summer	1149.38	702.396	36.2927	-0.879486	One small cooling tower
26096	KENYA	PATE ISLAND	0.4	1916	766.4	Oil	ICE	Diesel-Engines	Dry cooling	Air	Diesel	NA	248.313	173.819	41.06	-2.10904	By the size and fuel, it must be a small MCI generator
26097	KENYA	PYRAMID PACKAGING	0.6	1528	916.8	Sun	PV	Rooftop	No cooling	NA	Flat	Aw - Tropical Savannah	12.8407	8.98851	35.2661	0.501668	City. https://nvisionenergy.com/
26098	KENYA	RABAI	90	1916	172440	Oil	ICE	Diesel-Engines	Dry cooling	Air	HFO	NA	55870.5	39109.4	39.5628	-3.93339	Part of Rabai Power. 90 MW of MCI (2778) and 7.6 of Waste Heat (2779). Dry cooling with raks of fans
26099	KENYA	RABAI	7.6	1870.4	14215	waste heat	Rankine	Steam Turbine	Dry cooling	Air	Heat recovery	NA	538.098	376.668	39.5628	-3.93339	Part of Rabai Power. 90 MW of MCI (2778) and 7.6 of Waste Heat (2779). Dry cooling
26100	KENYA	RUIRU	3	1916	5748	Oil	ICE	Diesel-Engines	Dry cooling	Air	Diesel	NA	1862.35	1303.65	37.1167	-0.7	By the size and fuel, it must be a small diesel generator for the village. I cannot find it
26101	KENYA	RUPINGAZI	6	4311.8	25870.8	Hydropower	ROR	NA	NA	NA	NA	NA	30710.4	30710.4	37.6324	-0.580304	Operational 2019 https://web.kerea.org/wp-content/uploads/energy_digest_copy_5092016.pdf
26102	KENYA	SAGANA	1.5	4311.8	6467.7	Hydropower	ROR	NA	NA	NA	NA	NA	10230.7	10230.7	36.9476	-0.420132	Reservoir
26103	KENYA	SANG'ORO	21.2	4311.8	91410.2	Hydropower	ROR	NA	NA	NA	NA	NA	0	0	34.8	-0.35	ROR
26104	KENYA	SAOSA	0.39	4311.8	1681.6	Hydropower	Dammed	NA	NA	NA	NA	NA	0	0	35.2831	-0.367744	Tea plantation. ROR. https://www.gilkes.com/case-studies/dimbolil-modernisation
26105	KENYA	SONDU MIRIU	60	4311.8	258708	Hydropower	ROR	NA	NA	NA	NA	NA	0	0	34.9167	-0.333333	ROR
26106	KENYA	SOS CHILDREN'S KENYA	0.06	1528	91.68	Sun	PV	Land	No cooling	NA	Flat	Aw - Tropical Savannah	9.02321	6.31625	39.7178	-4.02421	City.
26107	KENYA	SOSIANI (SELBY FALLS)	0.4	4311.8	1724.72	Hydropower	ROR	NA	NA	NA	NA	NA	2506.4	2506.4	35.2699	0.520356	water falls. https://paukwa.or.ke/koromosho-falls/
26108	KENYA	SOUTH NYANZA SUGAR	7.2	2211	15919.2	Biomass	Rankine	Steam Turbine	No cooling	NA	Sugarcane	NA	2582.6	1807.82	34.5296	-0.891108	No cooling. Combined heat and power
26109	KENYA	SPINNERS AND SPINNERS I	0.7	1528	1069.6	Sun	PV	Rooftop	No cooling	NA	Flat	Cfb - Temperate Without dry Season	4.04888	2.83421	36.9529	-1.15029	City. https://nvisionenergy.com/
26110	KENYA	SPINNERS AND SPINNERS Ii	0.6	1528	916.8	Sun	PV	Rooftop	No cooling	NA	Flat	Cfb - Temperate Without dry Season	3.47047	2.42933	36.9525	-1.15072	City. https://nvisionenergy.com/
26111	KENYA	SUN FLORITEC FLOWER FARM	0.12	1528	183.36	Sun	PV	Rooftop	No cooling	NA	Flat	Csb - Temperate Dry Summer	0.694093	0.485865	36.3824	-0.67146	Agricultural Land. https://nvisionenergy.com/
26112	KENYA	TAGABI	2.562	4311.8	11046.8	Hydropower	ROR	NA	NA	NA	NA	NA	4922.96	4922.96	35.2831	-0.367744	ROR for Unilever tea. https://www.gilkes.com/user_uploads/tagabi%202.pdf
26113	KENYA	TANA NEW	19.6	4311.8	84511.3	Hydropower	ROR	NA	NA	NA	NA	NA	0	0	37.27	-0.78	Reservoir
26114	KENYA	TATU CITY INDUSTRIAL PARK	1	1528	1528	Sun	PV	Rooftop	No cooling	NA	Flat	Cfb - Temperate Without dry Season	5.78411	4.04888	36.923	-1.13944	Agricultural Land. https://nvisionenergy.com/
26115	KENYA	TENWEK HOSPITAL	0.32	4311.8	1379.78	Hydropower	ROR	NA	NA	NA	NA	NA	0	0	35.3416	-0.781291	ROR
26116	KENYA	TEREM FALLS	5.2	4311.8	22421.4	Hydropower	ROR	NA	NA	NA	NA	NA	0	0	34.768	-0.0917016	Waterfall. https://www.farab.com/en/portfolio/terem-hydro-power-plant/
26117	KENYA	THIBA	0.05	4311.8	215.59	Hydropower	ROR	NA	NA	NA	NA	NA	0	0	37.3587	-0.683882	ROR
26118	KENYA	THIKA	80	1916	153280	Oil	ICE	Diesel-Engines	Dry cooling	Air	HFO	NA	49662.7	34763.9	37.0507	-1.06072	Part of the same complex of Thika. Combined cycle. 87 MW of MCI (3290) and the rest of heat recovery (3291). Dry Cooling with racks of fans. https://thikapower.co.ke/
26119	KENYA	THIKA	7	1870.4	13092.8	waste heat	Rankine	Steam Turbine	Dry cooling	Air	Heat recovery	NA	495.616	346.931	37.0507	-1.06072	Part of the same complex of Thika. Combined cycle. 87 MW of MCI (3290) and the rest of heat recovery (3291). Dry Cooling. https://thikapower.co.ke/
26120	KENYA	TULAGA FLOWER FARM	0.06	1528	91.68	Sun	PV	Rooftop	No cooling	NA	Flat	Csb - Temperate Dry Summer	0.347047	0.242933	36.3836	-0.658048	Agricultural Land. https://nvisionenergy.com/
26121	KENYA	TUNGU-KIBIRI	0.018	4311.8	77.6124	Hydropower	ROR	NA	NA	NA	NA	NA	0	0	37.6291	-0.311907	ROR
26122	KENYA	TURKWEL	106	4311.8	457051	Hydropower	Dammed	NA	NA	NA	NA	NA	7.22505e+07	7.22505e+07	35.3333	1.9167	Reservoir
26123	KENYA	TWO RIVERS DEVELOPMENT	1.3	1528	1986.4	Sun	PV	Rooftop	No cooling	NA	Flat	Cfb - Temperate Without dry Season	7.51934	5.26354	36.7948	-1.21096	City. Operational in 2018. https://www.power-technology.com/marketdata/power-plant-profile-two-rivers-ruaka-solar-pv-plant-kenya/
26124	KENYA	UEA Baraton university	0.18	1528	275.04	Sun	PV	Land	No cooling	NA	Flat	Am - Tropical Monsoon	27.0696	18.9487	35.0831	0.258155	Forest. https://nvisionenergy.com/
26125	KENYA	UHURU FLOWERS	0.072	1528	110.016	Sun	PV	Rooftop	No cooling	NA	Flat	Aw - Tropical Savannah	1.54089	1.07862	37.366	0.0950806	Agricultural Land.
26126	KENYA	UTEE FLOWER FARM	0.06	1528	91.68	Sun	PV	Rooftop	No cooling	NA	Flat	Cfb - Temperate Without dry Season	0.347047	0.242933	36.7042	-1.11812	Agricultural Land. https://nvisionenergy.com/
26127	KENYA	WAJIR	4.904	1916	9396.06	Oil	ICE	Diesel-Engines	Dry cooling	Air	Diesel	NA	3044.32	2131.03	40.0534	1.75409	Power plant with a group of diesel generators. Cooling racks
26128	KENYA	WANJII	7.4	4311.8	31907.3	Hydropower	Dammed	NA	NA	NA	NA	NA	55632.1	55632.1	37.15	-0.716667	Reservoir
26129	KENYA	WARIDI & FRESCH CATCH, rose and fishfarm	0.175	1528	267.4	Sun	PV	Land	No cooling	NA	Flat	Aw - Tropical Savannah	26.3177	18.4224	37.0193	-1.39691	Agricultural Land. https://nvisionenergy.com/
27001	LESOTHO	MANTSONYANE	2	6978.6	13957.2	Hydropower	Dammed	NA	NA	NA	NA	NA	0	0	28.2699	-29.5332	Wind farm
27002	LESOTHO	MOKHOTLONG	0.656	6978.6	4577.96	Hydropower	ROR	NA	NA	NA	NA	NA	0	0	29.0675	-29.2894	ROR (very small)
27003	LESOTHO	'MUELA	72	6978.6	502459	Hydropower	Dammed	NA	NA	NA	NA	NA	0	0	28.4535	-28.7804	Water in a tunnel of 45 km from the Katze reservoir. https://eros.usgs.gov/media-gallery/earthshot/katse-dam
27004	LESOTHO	QACHAS NEK	0.4	6978.6	2791.44	Hydropower	ROR	NA	NA	NA	NA	NA	0	0	28.6894	-30.1154	ROR (very small)
27005	LESOTHO	SEMONKONG	0.18	6978.6	1256.15	Hydropower	ROR	NA	NA	NA	NA	NA	0	0	27.5099	-29.2857	ROR (very small)
27006	LESOTHO	TLOKOENG	0.67	6978.6	4675.66	Hydropower	ROR	NA	NA	NA	NA	NA	0	0	29.0647	-29.2789	ROR (very small)
28001	LIBERIA	BUCHANAN MINE	28.8	2835	81648	Oil	ICE	Diesel-Engines	Dry cooling	Air	Diesel	NA	26453.9	18517.8	-10.0467	5.88083	I cannot see any indication of other types of power plants near the Arcelor Mittal's complex. Likely a group of diesel generators to operate the complex and the port. Coast
28002	LIBERIA	BUSHROD	33	2835	93555	Oil	ICE	Diesel-Engines	Dry cooling	Air	Diesel	NA	30311.8	21218.3	-10.7833	6.35	Operational in 2016. Group of diesel engines
28003	LIBERIA	CEMENCO PLANT	5.7	2835	16159.5	Oil	ICE	Diesel-Engines	Dry cooling	Air	Diesel	NA	5235.67	3664.97	-10.7831	6.36357	Likely a group of diesel generators in the Cement plant. https://www.heidelbergmaterials.com/en/heidelbergcement-expands-its-cement-capacity-in-liberia
28004	LIBERIA	CONGO TOWN	1.25	2835	3543.75	Oil	ICE	Diesel-Engines	Dry cooling	Air	Diesel	NA	1148.17	803.722	-10.7323	6.26889	By the size and fuel, it must be a small MCI generator
28005	LIBERIA	FIRESTONE (Farmington river)	4.8	807.7	3876.96	Hydropower	Dammed	NA	NA	NA	NA	NA	114071	114071	-10.1808	6.1751	Reservoir. Built in WW II for the US army.
28006	LIBERIA	KRU TOWN	1.25	2835	3543.75	Oil	ICE	Diesel-Engines	Dry cooling	Air	Diesel	NA	1148.17	803.722	-10.8	6.41667	By the size and fuel, it must be a small MCI generator
28007	LIBERIA	MOUNT COFFEE	88	807.7	71077.6	Hydropower	Dammed	NA	NA	NA	NA	NA	0	0	-10.6767	6.51194	Reservoir. Rehabilitated in 2016. https://en.wikipedia.org/wiki/List_of_power_stations_in_Liberia
28008	LIBERIA	YANDOHUN REBUILD	0.06	807.7	48.462	Hydropower	ROR	NA	NA	NA	NA	NA	0	0	-10.3526	8.09904	ROR (very small)
28009	LIBERIA	YEKEPA MINE	76.8	2835	217728	Oil	ICE	Diesel-Engines	Dry cooling	Air	Diesel	NA	70543.8	49380.7	-8.5364	7.57905	I cannot see any indication of other types of power plants near the mine run by Arcelor Mittal. Likely a group of diesel generators to operate the mine. River nearby
28010	LIBERIA	ZORZOR SOLAR	0.042	1000	42	Sun	PV	Rooftop	No cooling	NA	Flat	Am - Tropical Monsoon	0.588253	0.411777	-9.4256	7.77524	City. I cannot find it, but for its size I assume it is rooftop
29001	LIBYA	ABU KAMASH	90	4391	395190	NG	Brayton	Gas Turbine	No cooling	NA	Natural Gas	NA	635782	508625	11.8221	33.0629	Six gas turbines. https://openinframap.org/stats/area/Libya/plants/977088210
29002	LIBYA	AL KHUMS	1130	4391	4961830	NG	Brayton	Gas Turbine	No cooling	NA	Natural Gas, HFO	NA	7.98259e+06	6.38607e+06	14.3312	32.6204	Two groups of gas turbines. The first with four units (oldest 1995), the second with two units (newest - 2016-2017). The whole complex is at least 1610 MW, with one Rankine and two Brayton plants. https://www.gem.wiki/Al_Khums_power_station
29003	LIBYA	AL KHUMS	480	4391	2107680	NG	Rankine	Steam Turbine	Once through	Saline	Natural Gas, HFO	NA	79784.4	53113.5	14.3307	32.6215	Four steam turbines units. The whole complex is at least 1610 MW, with one Rankine and two Brayton plants. https://www.gem.wiki/Al_Khums_power_station
29004	LIBYA	ALAWENAT (Uweinat)	15.44	2671	41240.2	Oil	ICE	Diesel-Engines	Dry cooling	Air	Diesel	NA	13361.8	9353.28	10.5562	25.7888	The town was off, the power plant is in the village of Alawenat, not Uweinat
29005	LIBYA	AL-KHALEEJ (Gulf Steam)	350	4391	1536850	NG	Rankine	Steam Turbine	Once through	Saline	Natural Gas, HFO	NA	58176.1	38728.6	16.347	31.2174	Power plant with future units not built yet. Some are observable being constructed in the satellite images. https://www.gem.wiki/Gulf_Steam_power_station
29006	LIBYA	AMAL FIELD	252	4391	1106532	NG	Brayton	Gas Turbine	No cooling	NA	Natural Gas	NA	1.78019e+06	1.42415e+06	21.1005	29.4842	Three gas turbines in the Amal field. Operational in 2012. Desert.
29007	LIBYA	AWBARI	31.99	2671	85445.3	Oil	ICE	Diesel-Engines	Dry cooling	Air	HFO	NA	27684.3	19379	12.7326	26.5888	In the vecinity of Wabari Gas, but in this case they are diesel engines. Likely running on HFO. It seems like cooling towers, but considering they are in the desert it is likely a group of large fans for air cooling
29008	LIBYA	AWBARI (Ubari, Wadi)	640	4391	2810240	NG	Brayton	Gas Turbine	No cooling	NA	Natural Gas, Crude Oil	NA	4.52111e+06	3.61689e+06	12.6795	26.5638	Four units of gas turbines. Air cooling. https://www.gem.wiki/Ubari_power_station
29009	LIBYA	AZZAWIYA REFINERY	25	2671	66775	Oil	Rankine	Steam Turbine	Once through	Saline	HFO	NA	10833	7211.69	12.6979	32.7899	Coast. Air cooling
29010	LIBYA	BENGHAZI NORTH	1735	4391	7618385	NG	Combined	Combined Cycle (CC)	Once through	Saline	Natural Gas, HFO	NA	288387	201871	20.1329	32.2013	Two sets of combined cycle units (first set of four units, second set of two units). Once through in the Coast of the mediterranean. https://www.gem.wiki/North_Benghazi_power_station
29011	LIBYA	BENGHAZI NORTH	160	2671	427360	Oil	Rankine	Steam Turbine	Once through	Saline	HFO	NA	69331.4	46154.8	20.1315	32.2022	Part of the Benghazi North Complex. But four Rankine steam units burning HFO. The same Once through system
29012	LIBYA	DARNAH	130	2671	347230	Oil	Rankine	Steam Turbine	Once through	Saline	HFO	NA	56331.8	37500.8	22.5867	32.7805	Coast. https://www.gem.wiki/Derna_Thermal_power_station
29013	LIBYA	DARNAH OASIS	41.75	4391	183324	NG	Brayton	Gas Turbine	No cooling	NA	Natural Gas	NA	294932	235946	22.6367	32.767	I cannot find. There are no results when searched under this name. It must be a Brayton power plant, if it exists.
29014	LIBYA	DARNAH OASIS	17.62	2671	47063	Oil	ICE	Diesel-Engines	Dry cooling	Air	Diesel	NA	15248.4	10673.9	22.6367	32.767	I cannot find. There are no results when searched under this name. It must be a group of diesel engines, if it exists.
29015	LIBYA	DEFA (Field)	29.6	4391	129974	NG	Brayton	Gas Turbine	No cooling	NA	Natural Gas	NA	209102	167281	19.9073	27.9889	Four gas turbines in the Gas and Oil field of Defa
29016	LIBYA	DEFA SOUTH	5.4	4391	23711.4	NG	Brayton	Gas Turbine	No cooling	NA	LPG	NA	38146.9	30517.5	19.9074	27.989	Gas turbines in the Defa Oil Field
29017	LIBYA	DEFA SOUTH	34	4391	149294	NG	Brayton	Gas Turbine	No cooling	NA	Natural Gas	NA	240184	192147	19.9197	28.2921	Four gas turbines in the Gas and Oil field of Defa South
29018	LIBYA	EL-FEEL FIELD	100	4391	439100	NG	Brayton	Gas Turbine	No cooling	NA	Natural Gas	NA	706424	565139	11.9785	26.0342	I cannot see clearly the gas turbines, but by its size and fuel there must be gas turbines.
29019	LIBYA	FIELD 103-A	50	2671	133550	Oil	ICE	Diesel-Engines	Dry cooling	Air	HFO	NA	43270.2	30289.1	20.7817	29.0428	Desert. Probably air cooling.
29020	LIBYA	GHAT	12.31	2671	32880	Oil	ICE	Diesel-Engines	Dry cooling	Air	Diesel	NA	10653.1	7457.18	10.1519	25.1375	Diesel generators near the Airport
29021	LIBYA	GIALO	12.5	4391	54887.5	NG	Brayton	Gas Turbine	No cooling	NA	LPG	NA	88303	70642.4	21.5445	29.2483	Desert. Air cooling
29022	LIBYA	GIALO	76.58	2671	204545	Oil	ICE	Diesel-Engines	Dry cooling	Air	Diesel	NA	66272.6	46390.8	21.4523	29.1472	Diesel engines near the village of Jialu
29023	LIBYA	HUN FARJAN	7.08	2671	18910.7	Oil	ICE	Diesel-Engines	Dry cooling	Air	Diesel	NA	6127.06	4288.94	15.8003	29.0727	Diesel engines in the next village. Looks abandoned, but I cannot see in the history if it was indeed abandoned.
29024	LIBYA	JADO	10.62	2671	28366	Oil	ICE	Diesel-Engines	Dry cooling	Air	Diesel	NA	9190.58	6433.41	12.0279	31.9599	It looks abandoned. Even in the description it says it is the Old Italian Jadu power plant. However, I cannot confirm it.
29025	LIBYA	JAKHIRA FIELD	47.25	2671	126205	Oil	ICE	Diesel-Engines	Dry cooling	Air	HFO	NA	40890.3	28623.2	20.2295	30.7809	Diesel engines near aqar
29026	LIBYA	KURFA (Kufra or Sarir)	855	2671	2283705	Oil	Brayton	Gas Turbine	No cooling	NA	HFO, Natural Gas	NA	3.67402e+06	2.93922e+06	22.0958	26.9095	Seven Gas turbine units with air cooling. The newest satellite imagine suggest the place has been decomissioned. CONFIRMED, since 2023 the plant is no longer there. The latest picture with them is from 2018. I assume that they were working on 2020. https://www.gem.wiki/Sarir_power_station
29027	LIBYA	MARSA EL-BREGA (NMC)	3.28	2671	8760.88	Oil	ICE	Diesel-Engines	Dry cooling	Air	HFO	NA	2838.52	1986.97	22.6382	32.7554	Diesel engines for the National Mining Corporation in the Marsa El-Brega Port
29028	LIBYA	MARSA EL-BREGA (NPC)	62.1	4391	272681	NG	Brayton	Gas Turbine	No cooling	NA	Natural Gas	NA	438689	350951	19.5972	30.4016	Gas turbines next to the LNG plant
29029	LIBYA	MARSA EL-BREGA (WOC)	25	2671	66775	Oil	ICE	Diesel-Engines	Dry cooling	Air	HFO	NA	21635.1	15144.6	19.6161	30.3997	Diesel engines for the Waha Oil Company in the Marsa El-Brega Port
29030	LIBYA	MESSLA OIL FIELD	47.2	2671	126071	Oil	Brayton	Gas Turbine	No cooling	NA	LPG	NA	202823	162259	22.3305	27.9873	Desert. Oil field. Four gas turbines
29031	LIBYA	MISURATA (LISCO) STEEL COMPLEX	507.36	4391	2.22782e+06	NG	Rankine	Steam Turbine	Once through	Saline	Natural Gas, HFO	NA	84332.1	56141	15.0906	32.3783	Two rankine units. Once through cooling. https://www.gem.wiki/Misurata_(LISCO)_power_station
29032	LIBYA	MISURATA GECOL	820	4391	3600620	NG	Combined	Combined Cycle (CC)	Once through	Saline	Natural Gas, HFO	NA	136298	95408.8	15.2441	32.3324	Two combined cycle units. Coast, once through. https://www.gem.wiki/Misurata_power_station The other units started since 2021
29033	LIBYA	MITIGA INTL AIRPORT	19.2	2671	51283.2	Oil	ICE	Diesel-Engines	Dry cooling	Air	Diesel	NA	16615.7	11631	13.2734	32.8998	Diesel engines for the airport.
29034	LIBYA	MOBILE DIESEL LIBYA	11.01	2671	29407.7	Oil	Brayton	Gas Turbine	No cooling	NA	Diesel, Natural Gas	NA	47311.1	37848.9	12.9746	32.823	Mobile gas turbines that could generate up until 24 MW. They are likely used somewhere else, but they were initially placed here. https://www.powerengineeringint.com/gas-oil-fired/mobile-power-to-help-beat-the-heat-in-libya/
29035	LIBYA	NAKHLA C97 GAS PLANT	7	4391	30737	NG	Brayton	Gas Turbine	No cooling	NA	LPG	NA	49449.7	39559.7	22.118	28.8397	Inside the gas field and plant. Inside a building. Because ther are no cooling racks or other similar infrastructure, it should be a group of gas turbines. Desert. https://processandcontrolmag.co.uk/hot-mission-for-a-generator-autonomous-electricity-generation-in-the-desert/
29036	LIBYA	PEARL HOTEL	3.2	2671	8547.2	Oil	ICE	Diesel-Engines	Dry cooling	Air	Diesel	NA	2769.29	1938.5	20.0667	32.1167	I cannot see it, but I assume is a generator in the hotel used as backup. Pearl Hotel in Derna
29037	LIBYA	RAS LANUF REFINERY	197.8	2671	528324	Oil	Rankine	Steam Turbine	Once through	Saline	HFO	NA	85711	57058.9	18.5667	30.5167	Group of small boilers, probably used for the desalination too, but also the electricity generation
29038	LIBYA	SABRATHA	13.86	2671	37020.1	Oil	ICE	Diesel-Engines	Dry cooling	Air	Diesel	NA	11994.5	8396.14	12.4847	32.7919	I cannot find it in the city, but probably it refers to the Sabratha Platform 110 km off the coast. https://mellitahog.ly/en/sites/sabratha-platform/
29039	LIBYA	SARIR (Oil Field)	45	2671	120195	Oil	Brayton	Gas Turbine	No cooling	NA	LPG	NA	193370	154696	22.4974	27.6463	Two gas turbines, probably three. For the Sarir Oil field
29040	LIBYA	SEMNO (Samnu, GECOL 1)	324	2671	865404	Oil	ICE	Diesel-Engines	Dry cooling	Air	Diesel	NA	280391	196273	14.8898	27.2217	Diesel engines with racks of cooling fans. https://www.gem.wiki/GECOL_power_plant_1
29041	LIBYA	SIRTE	1.968	2671	5256.53	Oil	ICE	Diesel-Engines	Dry cooling	Air	Diesel	NA	1703.11	1192.18	16.5947	31.2061	By its size and fuel I assume it is an ICE with diesel
29042	LIBYA	TIMIMI	9	2671	24039	Oil	ICE	Diesel-Engines	Dry cooling	Air	Diesel	NA	7788.63	5452.04	23.0609	32.4492	Diesel engines next to the distribution site
29043	LIBYA	TOBRUK	130	2671	347230	Oil	Rankine	Steam Turbine	Once through	Saline	HFO	NA	56331.8	37500.8	23.9809	32.0595	Coast. https://www.gem.wiki/Tobruk_Thermal_power_station
29044	LIBYA	TRIPOLI SOUTH	500	2671	1335500	Oil	Brayton	Gas Turbine	No cooling	NA	HFO	NA	2.14855e+06	1.71884e+06	13.0983	32.776	Five gas turbine units. Using HFO. https://www.gem.wiki/South_Tripoli_power_station
29045	LIBYA	WADI ZEM ZEM	6.16	2671	16453.4	Oil	ICE	Diesel-Engines	Dry cooling	Air	Diesel	NA	5330.88	3731.62	15.2346	31.3849	Diesel engines next to the distribution site
29046	LIBYA	WAFA FIELD	25	4391	109775	NG	Brayton	Gas Turbine	No cooling	NA	LPG	NA	176606	141285	10.0217	28.8868	Gas turbines for the Wafa Oil fiedl
29047	LIBYA	WEST SARIR	855	4391	3754305	NG	Brayton	Gas Turbine	No cooling	NA	Natural Gas	NA	6.03993e+06	4.83194e+06	21.618	27.5956	Three large gas turbines. Using natural gas. https://libyareview.com/8306/libyas-al-sarir-power-station-begins-operating-with-natural-gas/
29048	LIBYA	WEST TRIPOLI	500	2671	1335500	Oil	Rankine	Steam Turbine	Once through	Saline	Natural Gas, HFO	NA	216661	144234	12.9746	32.823	West tripoli is being expanded into other units. However until 2020, they worked with Rankine cycle of at least 500 MW. https://www.gem.wiki/West_Tripoli_Thermal_power_station
29049	LIBYA	WESTERN MOUNTAIN	936.6	4391	4.11261e+06	NG	Brayton	Gas Turbine	No cooling	NA	Natural Gas, HFO	NA	6.61637e+06	5.29309e+06	11.1453	31.9555	Six gas turbine units. No cooling. https://www.gem.wiki/Western_Mountain_power_plant
29050	LIBYA	ZAWIA (Al Zawiya)	1440	4391	6323040	NG	Combined	Combined Cycle (CC)	Once through	Saline	Natural Gas, HFO	NA	239353	167547	12.674	32.7882	Six units of combined cycle. Once through from the Mediterranean Sea. https://www.gem.wiki/Al_Zawiya_power_station
29051	LIBYA	ZELTEN FIELD	30	4391	131730	NG	Brayton	Gas Turbine	No cooling	NA	Natural Gas	NA	211927	169542	19.7721	28.9157	At least two gas turbines in the Gas and Oil Field of Zelten
29052	LIBYA	ZWITINA	770	4391	3381070	NG	Brayton	Gas Turbine	No cooling	NA	Natural Gas, HFO	NA	5.43947e+06	4.35157e+06	20.1165	30.9554	Four small gas turbines + two large gas turbines. Indicates the idea of using a Heat Recovery that was not constructed. Coast. https://www.gem.wiki/Zueitina_power_station
30001	MADAGASCAR	AMBANJA	2.34	1819	4256.46	Oil	ICE	Diesel-Engines	Dry cooling	Air	HFO	NA	1379.09	965.364	48.45	-13.6833	I cannot find it. Likely a group of diesel generators for the Ambanja village
30002	MADAGASCAR	AMBATO-BOENI	0.403	1819	733.057	Oil	ICE	Diesel-Engines	Dry cooling	Air	Diesel	NA	237.51	166.257	46.7167	-16.4667	By the size and fuel, it must be a small MCI generator
30003	MADAGASCAR	AMBATOFINA'HANA	0.184	1819	334.696	Oil	ICE	Diesel-Engines	Dry cooling	Air	Diesel	NA	108.441	75.909	47.7167	-18.5667	By the size and fuel, it must be a small MCI generator
30004	MADAGASCAR	AMBATOMAINTY	0.064	1819	116.416	Oil	ICE	Diesel-Engines	Dry cooling	Air	Diesel	NA	37.7188	26.4031	45.55	-24.7167	By the size and fuel, it must be a small MCI generator
30005	MADAGASCAR	AMBATONDRAZAKA	1.972	1819	3587.07	Oil	ICE	Diesel-Engines	Dry cooling	Air	Diesel	NA	1162.21	813.546	48.4167	-17.8333	By its size and fuel I assume it is an ICE with diesel
30006	MADAGASCAR	AMBATOSORATA EDM	0.064	1819	116.416	Oil	ICE	Diesel-Engines	Dry cooling	Air	Diesel	NA	37.7188	26.4031	48.4345	-17.8251	By the size and fuel, it must be a small MCI generator
30007	MADAGASCAR	AMBATOVY NICKEL	120	1819	218280	Coal	Rankine	Steam Turbine	Wet Tower	Freshwater	Pulverized Coal - Subcritical	Cfa - Temperate without Dry Season	539561	421403	48.313	-18.853	Two large forced flow cooling towers. Ponds. Subcritcal. https://www.gem.wiki/Ambatovy_Nickel_power_station
30008	MADAGASCAR	AMBILOBE	2.67	1819	4856.73	Oil	ICE	Diesel-Engines	Dry cooling	Air	HFO	NA	1573.58	1101.51	49.0499	-13.2029	I cannot find it. Likely a group of diesel generators for the Ambilobe village
30009	MADAGASCAR	AMBOASARY JIRAMA	0.178	1819	323.782	Oil	ICE	Diesel-Engines	Dry cooling	Air	Diesel	NA	104.905	73.4337	46.3833	-25.0333	By the size and fuel, it must be a small MCI generator
30010	MADAGASCAR	AMBOHIMANAMBOLA HFF	25	1819	45475	Oil	ICE	Diesel-Engines	Dry cooling	Air	HFO	NA	14733.9	10313.7	47.5991	-18.9312	Part of the Ambohimanambola complex. Diesel engines
30011	MADAGASCAR	AMBOHIMANAMBOLA HYDELEC	11.97	1819	21773.4	Oil	ICE	Diesel-Engines	Dry cooling	Air	HFO	NA	7054.59	4938.21	47.5989	-18.9308	Part of the Ambohimanambola complex. Diesel engines
30012	MADAGASCAR	AMBOHIMANAMBOLA-I	18	1819	32742	Oil	Brayton	Gas Turbine	No cooling	NA	HFO	NA	52675.3	42140.3	47.5985	-18.9297	Part of the Ambohimanambola complex. Gas turbines
30013	MADAGASCAR	AMBOHIMANAMBOLA-II	25	1819	45475	Oil	ICE	Diesel-Engines	Dry cooling	Air	HFO	NA	14733.9	10313.7	47.5987	-18.9319	Part of the Ambohimanambola complex. Diesel engines
30014	MADAGASCAR	AMBONDROMAMY	0.064	1819	116.416	Oil	ICE	Diesel-Engines	Dry cooling	Air	Diesel	NA	37.7188	26.4031	45.9036	-16.3656	By the size and fuel, it must be a small MCI generator
30015	MADAGASCAR	AMBOSITRA	1.35	1819	2455.65	Oil	ICE	Diesel-Engines	Dry cooling	Air	Diesel	NA	795.63	556.941	47.7667	-19.1667	By its size an location I assume ti is a diesel generator in the Helium Plant (Helison)
30016	MADAGASCAR	AMBOVOMBE	0.868	1819	1578.89	Oil	ICE	Diesel-Engines	Dry cooling	Air	Diesel	NA	511.561	358.092	46.0833	-25.1667	By the size and fuel, it must be a small MCI generator
30017	MADAGASCAR	AMPANEFENA	0.465	1819	845.835	Oil	ICE	Diesel-Engines	Dry cooling	Air	Diesel	NA	274.05	191.835	49.9667	-13.8667	By the size and fuel, it must be a small MCI generator
30018	MADAGASCAR	AMPANIHY OUEST	0.12	1819	218.28	Oil	ICE	Diesel-Engines	Dry cooling	Air	Diesel	NA	70.7227	49.5059	45	-18.4667	By the size and fuel, it must be a small MCI generator
30019	MADAGASCAR	AMPARIHITSOKATRA	0.024	1819	43.656	Oil	ICE	Diesel-Engines	Dry cooling	Air	Diesel	NA	14.1445	9.90117	48.4101	-17.8098	By its size and fuel I assume it is an ICE with diesel
30020	MADAGASCAR	AMPEFY	0.03	5415.4	162.462	Hydropower	ROR	NA	NA	NA	NA	NA	0	0	46.7324	-19.0389	ROR (very small)
30021	MADAGASCAR	ANAHIDRANO	0.018	1819	32.742	Oil	ICE	Diesel-Engines	Dry cooling	Air	Diesel	NA	10.6084	7.42588	47.65	-16.6667	By its size and fuel I assume it is an ICE with diesel
30022	MADAGASCAR	ANALALAVA	0.17	1819	309.23	Oil	ICE	Diesel-Engines	Dry cooling	Air	Diesel	NA	100.19	70.1333	47.25	-19.4833	By the size and fuel, it must be a small MCI generator
30023	MADAGASCAR	ANDAPA	0.852	1819	1549.79	Oil	ICE	Diesel-Engines	Dry cooling	Air	Diesel	NA	502.131	351.492	49.65	-14.65	By the size and fuel, it must be a small MCI generator
30024	MADAGASCAR	ANDEKALEKA	91	5912.1	538001	Hydropower	ROR	NA	NA	NA	NA	NA	0	0	48.6	-18.7833	Gravity. https://en.wikipedia.org/wiki/List_of_power_stations_in_Madagascar
30025	MADAGASCAR	ANDIBA	0.08	1819	145.52	Oil	ICE	Diesel-Engines	Dry cooling	Air	Diesel	NA	47.1484	33.0039	46.8307	-16.9452	By the size and fuel, it must be a small MCI generator
30026	MADAGASCAR	ANDILAMENA	0.272	1819	494.768	Oil	ICE	Diesel-Engines	Dry cooling	Air	Diesel	NA	160.305	112.213	48.5725	-17.0095	By the size and fuel, it must be a small MCI generator
30027	MADAGASCAR	ANDREBAKELY	0.048	1819	87.312	Oil	ICE	Diesel-Engines	Dry cooling	Air	Diesel	NA	28.2891	19.8023	48.4239	-17.8427	By the size and fuel, it must be a small MCI generator
30028	MADAGASCAR	ANDROMBA	0.036	1819	65.484	Oil	ICE	Diesel-Engines	Dry cooling	Air	Diesel	NA	21.2168	14.8518	48.4374	-17.7883	By its size and fuel I assume it is an ICE with diesel
30029	MADAGASCAR	ANIVORANO NORD	0.1	1819	181.9	Oil	ICE	Diesel-Engines	Dry cooling	Air	Diesel	NA	58.9356	41.2549	46.3333	-23.75	By the size and fuel, it must be a small MCI generator
30030	MADAGASCAR	ANKAZOBE	0.05	5415.4	270.77	Hydropower	ROR	NA	NA	NA	NA	NA	0	0	47.1167	-18.3167	ROR (very small)
30031	MADAGASCAR	ANKAZOBE	0.311	1819	565.709	Oil	ICE	Diesel-Engines	Dry cooling	Air	Diesel	NA	183.29	128.303	47.1167	-18.3167	By the size and fuel, it must be a small MCI generator
30032	MADAGASCAR	ANKAZOMIRIOTRA	0.12	5415.4	649.848	Hydropower	ROR	NA	NA	NA	NA	NA	0	0	46.8577	-19.8301	ROR (very small)
30033	MADAGASCAR	ANKIDONA	1	1819	1819	Oil	ICE	Diesel-Engines	Dry cooling	Air	Diesel	NA	589.356	412.549	48.2167	-20.0667	By the size and fuel, it must be a small MCI generator
30034	MADAGASCAR	ANKZAOABO SUD	0.1	1819	181.9	Oil	ICE	Diesel-Engines	Dry cooling	Air	Diesel	NA	58.9356	41.2549	44.5167	-22.2833	By the size and fuel, it must be a small MCI generator
30035	MADAGASCAR	ANTALAHA	2.05	1819	3728.95	Oil	ICE	Diesel-Engines	Dry cooling	Air	Diesel	NA	1208.18	845.725	50.2788	-14.9003	By its size and fuel I assume it is an ICE with diesel near the coastal city
30036	MADAGASCAR	ANTANAMBANO	0.117	1819	212.823	Oil	ICE	Diesel-Engines	Dry cooling	Air	Diesel	NA	68.9546	48.2682	48.5667	-19.4833	By the size and fuel, it must be a small MCI generator
30037	MADAGASCAR	ANTANANARIVO	0.1	1819	181.9	Oil	ICE	Diesel-Engines	Dry cooling	Air	Diesel	NA	58.9356	41.2549	47.5167	-18.9167	By the size and fuel, it must be a small MCI generator
30038	MADAGASCAR	ANTELOMITA	8.2	5000	41000	Hydropower	ROR	NA	NA	NA	NA	NA	0	0	47.5361	-18.9137	This was defined as hydro, but the coordinates actually show a group of diesel generators in the village of Antsirabe
30039	MADAGASCAR	ANTELOMITA DIESEL	7.5	1819	13642.5	Oil	ICE	Diesel-Engines	Dry cooling	Air	HFO	NA	4420.17	3094.12	47.5079	-18.8792	I cannot find it, but probably is a diesel group in the hydropower complex of Antelomita
30040	MADAGASCAR	ANTETEZAMBATO MINI	0.042	5415.4	227.447	Hydropower	ROR	NA	NA	NA	NA	NA	0	0	47.246	-20.5363	ROR (very small)
30041	MADAGASCAR	ANTSALOVA	0.064	1819	116.416	Oil	ICE	Diesel-Engines	Dry cooling	Air	Diesel	NA	37.7188	26.4031	44.6167	-18.6667	By the size and fuel, it must be a small MCI generator
30042	MADAGASCAR	ANTSIAFABOSITRA	0.015	1819	27.285	Oil	ICE	Diesel-Engines	Dry cooling	Air	Diesel	NA	8.84033	6.18823	46.8297	-16.955	By its size and fuel I assume it is an ICE with diesel
30043	MADAGASCAR	ANTSIRABE	7.68	1819	13969.9	Oil	ICE	Diesel-Engines	Dry cooling	Air	HFO	NA	4526.25	3168.38	47.046	-19.882	Diesel engines
30044	MADAGASCAR	ANTSIRABE (Tiko Oil)	1.59	1819	2892.21	Oil	ICE	Diesel-Engines	Dry cooling	Air	Diesel	NA	937.075	655.953	47.0478	-19.8414	This was defined as hydro, but the coordinates actually show a group of diesel generators in the village of Antsirabe
30045	MADAGASCAR	ANTSIRABE HFF	4.55	1819	8276.45	Oil	ICE	Diesel-Engines	Dry cooling	Air	HFO	NA	2681.57	1877.1	47.0462	-19.8826	Diesel engines
30046	MADAGASCAR	ANTSIRABE HYDELEC	5	1819	9095	Oil	ICE	Diesel-Engines	Dry cooling	Air	HFO	NA	2946.78	2062.74	47.0463	-19.8819	Diesel engines
30047	MADAGASCAR	ANTSIRANANA	19.2	1819	34924.8	Oil	ICE	Diesel-Engines	Dry cooling	Air	HFO	NA	11315.6	7920.94	49.2971	-12.333	Diesel engines in the town of Antsiranana
30048	MADAGASCAR	ANTSOHIHY	1.94	1819	3528.86	Oil	ICE	Diesel-Engines	Dry cooling	Air	Diesel	NA	1143.35	800.345	47.9875	-14.8796	By the size and fuel, it must be a small MCI generator
30049	MADAGASCAR	BEALANANA	0.192	1819	349.248	Oil	ICE	Diesel-Engines	Dry cooling	Air	Diesel	NA	113.156	79.2094	48.7333	-14.55	By the size and fuel, it must be a small MCI generator
30050	MADAGASCAR	BEFANDRIANA	0.25	1819	454.75	Oil	ICE	Diesel-Engines	Dry cooling	Air	Diesel	NA	147.339	103.137	48.5333	-15.2667	By the size and fuel, it must be a small MCI generator
30051	MADAGASCAR	BEFOTAKA	0.034	1819	61.846	Oil	ICE	Diesel-Engines	Dry cooling	Air	Diesel	NA	20.0381	14.0267	46.9833	-23.8167	By its size and fuel I assume it is an ICE with diesel
30052	MADAGASCAR	BEKILY	0.216	1819	392.904	Oil	ICE	Diesel-Engines	Dry cooling	Air	Diesel	NA	127.301	89.1106	46.0167	-23.6	By the size and fuel, it must be a small MCI generator
30053	MADAGASCAR	BELO TSIRIBIHINA	0.341	1819	620.279	Oil	ICE	Diesel-Engines	Dry cooling	Air	Diesel	NA	200.97	140.679	44.5391	-19.7084	By the size and fuel, it must be a small MCI generator
30054	MADAGASCAR	BELOHA	0.064	1819	116.416	Oil	ICE	Diesel-Engines	Dry cooling	Air	Diesel	NA	37.7188	26.4031	45.05	-25.1667	By the size and fuel, it must be a small MCI generator
30055	MADAGASCAR	BENEITRA	0.039	1819	70.941	Oil	ICE	Diesel-Engines	Dry cooling	Air	Diesel	NA	22.9849	16.0894	45.0833	-23.45	By its size and fuel I assume it is an ICE with diesel
30056	MADAGASCAR	BEROROHA	0.08	1819	145.52	Oil	ICE	Diesel-Engines	Dry cooling	Air	Diesel	NA	47.1484	33.0039	45.1667	-21.6667	By the size and fuel, it must be a small MCI generator
30057	MADAGASCAR	BESALAMPY	0.128	1819	232.832	Oil	ICE	Diesel-Engines	Dry cooling	Air	Diesel	NA	75.4375	52.8063	44.3333	-22.45	By the size and fuel, it must be a small MCI generator
30058	MADAGASCAR	BETANIA PV	0.001	1736.4	1.7364	Sun	PV	Rooftop	No cooling	NA	Flat	BWh - Desert Hot	0.0243201	0.017024	43.7	-23.35	I cannot see it, but I assume it is rooftop due to its size
30059	MADAGASCAR	BETIOKY SUD	0.13	1819	236.47	Oil	ICE	Diesel-Engines	Dry cooling	Air	Diesel	NA	76.6162	53.6314	44.3797	-23.7232	By the size and fuel, it must be a small MCI generator
30060	MADAGASCAR	BETROKA	0.38	1819	691.22	Oil	ICE	Diesel-Engines	Dry cooling	Air	Diesel	NA	223.955	156.769	45.75	-21.35	By the size and fuel, it must be a small MCI generator
30061	MADAGASCAR	BEZAHA	0.144	1819	261.936	Oil	ICE	Diesel-Engines	Dry cooling	Air	Diesel	NA	84.8672	59.407	45.4167	-25.5333	By the size and fuel, it must be a small MCI generator
30062	MADAGASCAR	BONDO MUREA	0.075	5528.2	414.615	Hydropower	ROR	NA	NA	NA	NA	NA	0	0	33.3794	-19.0739	ROR (very small)
30063	MADAGASCAR	BRICKAVILLE	0.232	1819	422.008	Oil	ICE	Diesel-Engines	Dry cooling	Air	Diesel	NA	136.73	95.7113	49.0667	-18.8167	By the size and fuel, it must be a small MCI generator
30064	MADAGASCAR	Centrale Solaire Akuo	2.9	1736.4	5035.56	Sun	PV	Land	No cooling	NA	Flat	BWh - Desert Hot	495.603	346.922	43.7156	-23.3614	PV plant to help reduce the cost of HFO power plant of Toamasina. Operating since the last trimester of 2020. https://www.akuoenergy.com/madagascar-premieres-unites-energie-solaire-entierement-mobiles-et-portatives
30065	MADAGASCAR	FARAFANGANA	0.067	1819	121.873	Oil	ICE	Diesel-Engines	Dry cooling	Air	Diesel	NA	39.4868	27.6408	47.8333	-22.8167	By the size and fuel, it must be a small MCI generator
30066	MADAGASCAR	FARAHAIANA	0.064	1819	116.416	Oil	ICE	Diesel-Engines	Dry cooling	Air	Diesel	NA	37.7188	26.4031	50.1669	-14.2667	By the size and fuel, it must be a small MCI generator
30067	MADAGASCAR	FENERIVE EST	0.96	1819	1746.24	Oil	ICE	Diesel-Engines	Dry cooling	Air	Diesel	NA	565.781	396.047	49.4167	-17.3667	By the size and fuel, it must be a small MCI generator
30068	MADAGASCAR	FENOARIVO CENTRE	0.112	1819	203.728	Oil	ICE	Diesel-Engines	Dry cooling	Air	Diesel	NA	66.0078	46.2055	46.0167	-23.1167	By the size and fuel, it must be a small MCI generator
30069	MADAGASCAR	FOULPOINTE	0.27	1819	491.13	Oil	ICE	Diesel-Engines	Dry cooling	Air	Diesel	NA	159.126	111.388	49.5087	-17.6848	By the size and fuel, it must be a small MCI generator
30070	MADAGASCAR	IAKORA	0.067	1819	121.873	Oil	ICE	Diesel-Engines	Dry cooling	Air	Diesel	NA	39.4868	27.6408	46.65	-23.1	By the size and fuel, it must be a small MCI generator
30071	MADAGASCAR	IHOSY	0.55	1819	1000.45	Oil	ICE	Diesel-Engines	Dry cooling	Air	Diesel	NA	324.146	226.902	46.1167	-22.4	By the size and fuel, it must be a small MCI generator
30072	MADAGASCAR	IKALAMAVONY	0.146	1819	265.574	Oil	ICE	Diesel-Engines	Dry cooling	Air	Diesel	NA	86.0459	60.2321	46.5833	-21.15	By the size and fuel, it must be a small MCI generator
30073	MADAGASCAR	IKONGO	0.067	1819	121.873	Oil	ICE	Diesel-Engines	Dry cooling	Air	Diesel	NA	39.4868	27.6408	47.4333	-21.8833	By the size and fuel, it must be a small MCI generator
30074	MADAGASCAR	ILAKA EST	0.036	1819	65.484	Oil	ICE	Diesel-Engines	Dry cooling	Air	Diesel	NA	21.2168	14.8518	48.7986	-19.5765	By its size and fuel I assume it is an ICE with diesel
30075	MADAGASCAR	ILAKAKA RANOHIRA	0.4	1819	727.6	Oil	ICE	Diesel-Engines	Dry cooling	Air	Diesel	NA	235.742	165.02	46.7166	-16.4712	By the size and fuel, it must be a small MCI generator
30076	MADAGASCAR	IMERIMANDROSO	0.048	1819	87.312	Oil	ICE	Diesel-Engines	Dry cooling	Air	Diesel	NA	28.2891	19.8023	48.4233	-17.8425	By the size and fuel, it must be a small MCI generator
30077	MADAGASCAR	IVOHIBE	0.096	1819	174.624	Oil	ICE	Diesel-Engines	Dry cooling	Air	Diesel	NA	56.5781	39.6047	46.8833	-22.4833	By the size and fuel, it must be a small MCI generator
30078	MADAGASCAR	KANDREHO	0.064	1819	116.416	Oil	ICE	Diesel-Engines	Dry cooling	Air	Diesel	NA	37.7188	26.4031	46.1	-17.4833	By the size and fuel, it must be a small MCI generator
30079	MADAGASCAR	MAEVATANANA	0.39	1819	709.41	Oil	ICE	Diesel-Engines	Dry cooling	Air	Diesel	NA	229.849	160.894	46.8333	-16.95	By the size and fuel, it must be a small MCI generator
30080	MADAGASCAR	MAHABO	0.178	1819	323.782	Oil	ICE	Diesel-Engines	Dry cooling	Air	Diesel	NA	104.905	73.4337	46.8667	-18.3167	By the size and fuel, it must be a small MCI generator
30081	MADAGASCAR	MAHAJANGA	7	1819	12733	Oil	ICE	Diesel-Engines	Dry cooling	Air	HFO	NA	4125.49	2887.84	46.3162	-15.725	Diesel engines
30082	MADAGASCAR	MAHAJANGA ENELEC	13	1819	23647	Oil	ICE	Diesel-Engines	Dry cooling	Air	HFO	NA	7661.62	5363.14	46.3164	-15.7253	Diesel engines
30083	MADAGASCAR	MAHAJANGA POWER	17	1666.7	28333.9	Sun	PV	Land	No cooling	NA	Flat	Aw - Tropical Savannah	2788.64	1952.05	46.4216	-15.7034	Semi-arid. Operational in 2020. https://www.power-technology.com/marketdata/power-plant-profile-andranotakatra-hybrid-solar-power-plant-madagascar/
30084	MADAGASCAR	MAHANORO	0.336	1819	611.184	Oil	ICE	Diesel-Engines	Dry cooling	Air	Diesel	NA	198.023	138.616	48.8	-19.9	By the size and fuel, it must be a small MCI generator
30085	MADAGASCAR	MAINTIRANO	0.535	1819	973.165	Oil	ICE	Diesel-Engines	Dry cooling	Air	Diesel	NA	315.305	220.714	44.3667	-22.0167	By the size and fuel, it must be a small MCI generator
30086	MADAGASCAR	MAMPIKONY	0.26	1819	472.94	Oil	ICE	Diesel-Engines	Dry cooling	Air	Diesel	NA	153.232	107.263	47.6333	-16.1	By the size and fuel, it must be a small MCI generator
30087	MADAGASCAR	MANAJARY	0.66	1819	1200.54	Oil	ICE	Diesel-Engines	Dry cooling	Air	Diesel	NA	388.975	272.282	48.3333	-21.2167	By the size and fuel, it must be a small MCI generator
30088	MADAGASCAR	MANAKAMBAHINY	0.171	1819	311.049	Oil	ICE	Diesel-Engines	Dry cooling	Air	Diesel	NA	100.78	70.5459	48.3	-17.85	By the size and fuel, it must be a small MCI generator
30089	MADAGASCAR	MANAKARA	2.244	1819	4081.84	Oil	ICE	Diesel-Engines	Dry cooling	Air	Diesel	NA	1322.51	925.76	48.0167	-22.1333	By its size and fuel I assume it is an ICE with diesel
30090	MADAGASCAR	MANANARA AVARATRA	0.13	1819	236.47	Oil	ICE	Diesel-Engines	Dry cooling	Air	Diesel	NA	76.6162	53.6314	49.7667	-16.1667	By the size and fuel, it must be a small MCI generator
30091	MADAGASCAR	MANANARA NORD	0.46	1819	836.74	Oil	ICE	Diesel-Engines	Dry cooling	Air	Diesel	NA	271.104	189.772	49.7667	-16.1667	By the size and fuel, it must be a small MCI generator
30092	MADAGASCAR	MANANDRAY	0.5	4000	2000	Hydropower	ROR	NA	NA	NA	NA	NA	0	0	47.0738	-19.9391	By the size and fuel, it must be a small MCI generator
30093	MADAGASCAR	MANANDRIANA	0.084	1819	152.796	Oil	ICE	Diesel-Engines	Dry cooling	Air	Diesel	NA	49.5059	34.6541	47.1	-18.8167	By the size and fuel, it must be a small MCI generator
30094	MADAGASCAR	MANANDRONA	1.6	3125	5000	Hydropower	ROR	NA	NA	NA	NA	NA	0	0	47.2667	-21.1333	ROR. https://documents1.worldbank.org/curated/en/994251504690067409/pdf/119399-V2-ESMAP-P145530-PUBLIC-madagascar.pdf
30095	MADAGASCAR	MANDOTO	0.08	1819	145.52	Oil	ICE	Diesel-Engines	Dry cooling	Air	Diesel	NA	47.1484	33.0039	46.8541	-19.8406	By the size and fuel, it must be a small MCI generator
30096	MADAGASCAR	MANDRAKA-I	24	2500	60000	Hydropower	Dammed	NA	NA	NA	NA	NA	0	0	47.9333	-18.9167	Gravity. https://en.wikipedia.org/wiki/List_of_power_stations_in_Madagascar
30097	MADAGASCAR	MANDRITSARA	0.04	5415.4	216.616	Hydropower	ROR	NA	NA	NA	NA	NA	0	0	48.833	-15.849	ROR (very small)
30098	MADAGASCAR	MANDRITSARA JIRAMA	0.434	1819	789.446	Oil	ICE	Diesel-Engines	Dry cooling	Air	Diesel	NA	255.78	179.046	48.8474	-15.8453	By the size and fuel, it must be a small MCI generator
30099	MADAGASCAR	MANDROSEZA	40	1819	72760	Oil	ICE	Diesel-Engines	Dry cooling	Air	HFO	NA	23574.2	16502	47.5488	-18.9293	Diesel engines. https://www.symbion-power.com/madagascar-2-2/
30100	MADAGASCAR	MANGAMILA	0.1	5415.4	541.54	Hydropower	ROR	NA	NA	NA	NA	NA	0	0	47.8786	-18.4033	ROR (very small)
30101	MADAGASCAR	MANGAMILA	0.048	1819	87.312	Oil	ICE	Diesel-Engines	Dry cooling	Air	Diesel	NA	28.2891	19.8023	47.8786	-18.4033	By the size and fuel, it must be a small MCI generator
30102	MADAGASCAR	MANJA	0.13	1819	236.47	Oil	ICE	Diesel-Engines	Dry cooling	Air	Diesel	NA	76.6162	53.6314	49	-15.7833	By the size and fuel, it must be a small MCI generator
30103	MADAGASCAR	MAROANTSETRA (VODIRIANA)	1.2	5912.1	7094.52	Hydropower	ROR	NA	NA	NA	NA	NA	0	0	49.7333	-15.4333	ROR
30104	MADAGASCAR	MAROANTSETRA JIRAMA	1.462	1819	2659.38	Oil	ICE	Diesel-Engines	Dry cooling	Air	Diesel	NA	861.638	603.146	49.7333	-15.4333	By the size and fuel, it must be a small MCI generator
30105	MADAGASCAR	MAROLAMBO	0.068	1819	123.692	Oil	ICE	Diesel-Engines	Dry cooling	Air	Diesel	NA	40.0762	28.0533	48.1167	-20.05	By the size and fuel, it must be a small MCI generator
30106	MADAGASCAR	MAROVOAY	0.665	1819	1209.63	Oil	ICE	Diesel-Engines	Dry cooling	Air	Diesel	NA	391.921	274.345	46.6333	-16.1	By the size and fuel, it must be a small MCI generator
30107	MADAGASCAR	MASOMELOKA	0.052	1819	94.588	Oil	ICE	Diesel-Engines	Dry cooling	Air	Diesel	NA	30.6465	21.4525	48.6167	-20.2833	By the size and fuel, it must be a small MCI generator
30108	MADAGASCAR	MIANDRIVAZO	0.306	1819	556.614	Oil	ICE	Diesel-Engines	Dry cooling	Air	Diesel	NA	180.343	126.24	47.4333	-18.6167	By the size and fuel, it must be a small MCI generator
30109	MADAGASCAR	MIDONGY SUD	0.05	1819	90.95	Oil	ICE	Diesel-Engines	Dry cooling	Air	Diesel	NA	29.4678	20.6274	47.0167	-23.5833	By the size and fuel, it must be a small MCI generator
30110	MADAGASCAR	MITSINJO	0.064	1819	116.416	Oil	ICE	Diesel-Engines	Dry cooling	Air	Diesel	NA	37.7188	26.4031	45.8667	-16	By the size and fuel, it must be a small MCI generator
30111	MADAGASCAR	MORAFENOBE	0.114	1819	207.366	Oil	ICE	Diesel-Engines	Dry cooling	Air	Diesel	NA	67.1865	47.0306	44.9167	-17.8167	By the size and fuel, it must be a small MCI generator
30112	MADAGASCAR	MOROMBE	0.258	1819	469.302	Oil	ICE	Diesel-Engines	Dry cooling	Air	Diesel	NA	152.054	106.438	43.35	-21.7333	By the size and fuel, it must be a small MCI generator
30113	MADAGASCAR	MORONDAVA	2.72	1819	4947.68	Oil	ICE	Diesel-Engines	Dry cooling	Air	HFO	NA	1603.05	1122.13	44.3007	-20.2903	I cannot find it. Likely a group of diesel generators for the Taolagnaro village
30114	MADAGASCAR	NAMORONA	5.6	7500	42000	Hydropower	ROR	NA	NA	NA	NA	NA	0	0	48.1846	-21.6395	ROR. https://www.openstreetmap.org/way/581190212
30115	MADAGASCAR	NAMORONA	2.132	1819	3878.11	Oil	ICE	Diesel-Engines	Dry cooling	Air	Diesel	NA	1256.51	879.554	48.1846	-21.6395	By its size and fuel I assume it is an ICE with diesel
30116	MADAGASCAR	NOSY VARIKA	0.064	1819	116.416	Oil	ICE	Diesel-Engines	Dry cooling	Air	Diesel	NA	37.7188	26.4031	48.5333	-20.5833	By the size and fuel, it must be a small MCI generator
30117	MADAGASCAR	NOSY-BE	7.75	1819	14097.2	Oil	ICE	Diesel-Engines	Dry cooling	Air	HFO	NA	4567.51	3197.25	48.2111	-13.3861	Diesel engines for the island.
30118	MADAGASCAR	PORT-BERGE	0.41	1819	745.79	Oil	ICE	Diesel-Engines	Dry cooling	Air	Diesel	NA	241.636	169.145	47.6667	-15.55	By the size and fuel, it must be a small MCI generator
30119	MADAGASCAR	QIT ILMENITE	16	1819	29104	Oil	ICE	Diesel-Engines	Dry cooling	Air	HFO	NA	9429.69	6600.78	47.0092	-24.9612	Diesel engines running with HFO next to the Mine
30120	MADAGASCAR	RANOHIRA	0.15	1819	272.85	Oil	ICE	Diesel-Engines	Dry cooling	Air	Diesel	NA	88.4033	61.8823	45.4141	-22.5558	By the size and fuel, it must be a small MCI generator
30121	MADAGASCAR	RANOTSARA IAKORA	0.02	5415.4	108.308	Hydropower	ROR	NA	NA	NA	NA	NA	0	0	46.5933	-23.1148	ROR (very small)
30122	MADAGASCAR	SAHAMADIO	0.128	5415.4	693.171	Hydropower	ROR	NA	NA	NA	NA	NA	0	0	47.2427	-20.5481	ROR (very small)
30123	MADAGASCAR	SAHAMADIO	0.084	1819	152.796	Oil	ICE	Diesel-Engines	Dry cooling	Air	Diesel	NA	49.5059	34.6541	47.2427	-20.5481	By the size and fuel, it must be a small MCI generator
30124	MADAGASCAR	SAHANIVOTRY	15	5333.3	79999.5	Hydropower	ROR	NA	NA	NA	NA	NA	10421.1	10421.1	47.1328	-20.2003	ROR
30125	MADAGASCAR	SAINTE-MARIE JIRAMA	1.472	1819	2677.57	Oil	ICE	Diesel-Engines	Dry cooling	Air	Diesel	NA	867.531	607.272	49.9056	-16.8941	By the size and fuel, it must be a small MCI generator
30126	MADAGASCAR	SAKARAHA	0.328	1819	596.632	Oil	ICE	Diesel-Engines	Dry cooling	Air	Diesel	NA	193.309	135.316	44.5333	-22.9	By the size and fuel, it must be a small MCI generator
30127	MADAGASCAR	SAMBAVA	3.456	1819	6286.46	Oil	ICE	Diesel-Engines	Dry cooling	Air	HFO	NA	2036.81	1425.77	50.1667	-14.2667	I cannot find it. Likely a group of diesel generators for the Sambava town
30128	MADAGASCAR	SOALALA	0.064	1819	116.416	Oil	ICE	Diesel-Engines	Dry cooling	Air	Diesel	NA	37.7188	26.4031	45.3167	-16.1	By the size and fuel, it must be a small MCI generator
30129	MADAGASCAR	SOLANIERAN'IVONGO	0.244	1819	443.836	Oil	ICE	Diesel-Engines	Dry cooling	Air	Diesel	NA	143.803	100.662	49.5833	-16.9167	By the size and fuel, it must be a small MCI generator
30130	MADAGASCAR	TAOLAGNARO	2.883	1819	5244.18	Oil	ICE	Diesel-Engines	Dry cooling	Air	HFO	NA	1699.11	1189.38	46.9987	-25.0319	I cannot find it. Likely a group of diesel generators for the Taolagnaro village
30131	MADAGASCAR	TOAMASINA GREEN POWER	2	1736.4	3472.8	Sun	PV	Land	No cooling	NA	Flat	Af - Tropical Rainforest	341.795	239.257	49.3875	-18.1696	PV plant to help reduce the cost of HFO power plant of Toamasina. Operating since the last quarter of 2020. https://deraenergy.netlify.app/projects/toamasina-solar/
30132	MADAGASCAR	TOAMASINA-1	16.59	1819	30177.2	Oil	ICE	Diesel-Engines	Dry cooling	Air	HFO	NA	9777.41	6844.19	49.3918	-18.1662	Part of the Toamasina Complex. Diesel engines running with HFO next to the industrial complex
30133	MADAGASCAR	TOAMASINA-3	7.5	1819	13642.5	Oil	ICE	Diesel-Engines	Dry cooling	Air	HFO	NA	4420.17	3094.12	49.3903	-18.1673	Part of the Toamasina Complex. Another group of diesel engines http://www.tresorpublic.mg/?p=24533
30134	MADAGASCAR	TOAMASINA-4	12.6	1819	22919.4	Oil	ICE	Diesel-Engines	Dry cooling	Air	HFO	NA	7425.88	5198.12	49.3915	-18.166	Part of the Toamasina Complex. The addition of two generators http://www.tresorpublic.mg/?p=24533
30135	MADAGASCAR	TOLIARY	14.948	1819	27190.4	Oil	ICE	Diesel-Engines	Dry cooling	Air	HFO	NA	8809.69	6166.78	43.7149	-23.3644	Diesel engines
30136	MADAGASCAR	TSARARANTANA	0.096	1819	174.624	Oil	ICE	Diesel-Engines	Dry cooling	Air	Diesel	NA	56.5781	39.6047	47.65	-16.7833	By the size and fuel, it must be a small MCI generator
30137	MADAGASCAR	TSIAZOMPANIRY FRAISE	5.2	4038.5	21000.2	Hydropower	Dammed	NA	NA	NA	NA	NA	0	0	48	-21.1167	Reservoir. https://en.wikipedia.org/wiki/Tsiazompaniry_Dam
30138	MADAGASCAR	TSIAZOMPANIRY JIRAMA	0.05	5415.4	270.77	Hydropower	ROR	NA	NA	NA	NA	NA	0	0	47.85	-19.2667	ROR (very small)
30139	MADAGASCAR	TSIAZOMPANIRY JIRAMA	0.08	1819	145.52	Oil	ICE	Diesel-Engines	Dry cooling	Air	Diesel	NA	47.1484	33.0039	47.85	-19.2667	By the size and fuel, it must be a small MCI generator
30140	MADAGASCAR	TSIHOMBE	2.883	1819	5244.18	Oil	ICE	Diesel-Engines	Dry cooling	Air	HFO	NA	1699.11	1189.38	45.4833	-25.3	I cannot find it. Likely a group of diesel generators for the TSIHOMBE
30141	MADAGASCAR	TSIROANOMANDIDY	0.6	1819	1091.4	Oil	ICE	Diesel-Engines	Dry cooling	Air	Diesel	NA	353.613	247.529	46.0333	-18.7667	By the size and fuel, it must be a small MCI generator
30142	MADAGASCAR	VANGAINDRANO	0.225	1819	409.275	Oil	ICE	Diesel-Engines	Dry cooling	Air	Diesel	NA	132.605	92.8235	47.6	-23.35	By the size and fuel, it must be a small MCI generator
30143	MADAGASCAR	VATOMANDRY	0.2	2912.1	582.42	Hydropower	ROR	NA	NA	NA	NA	NA	0	0	48.9833	-19.3333	ROR. https://www.unido.org/sites/default/files/files/2020-08/WSHPDR_2016_final_report.pdf
30144	MADAGASCAR	VATOMANDRY	0.6	1819	1091.4	Oil	ICE	Diesel-Engines	Dry cooling	Air	Diesel	NA	353.613	247.529	48.9833	-19.3333	By the size and fuel, it must be a small MCI generator
30145	MADAGASCAR	VAVATENINA	0.23	1819	418.37	Oil	ICE	Diesel-Engines	Dry cooling	Air	Diesel	NA	135.552	94.8862	49.2	-17.4667	By the size and fuel, it must be a small MCI generator
30146	MADAGASCAR	VOHEMAR	0.914	1819	1662.57	Oil	ICE	Diesel-Engines	Dry cooling	Air	Diesel	NA	538.671	377.07	50	-13.35	By the size and fuel, it must be a small MCI generator
30147	MADAGASCAR	VOHIMENA	0.032	1819	58.208	Oil	ICE	Diesel-Engines	Dry cooling	Air	Diesel	NA	18.8594	13.2016	48.4188	-17.8427	By its size and fuel I assume it is an ICE with diesel
30148	MADAGASCAR	VOHIPENO	0.14	1819	254.66	Oil	ICE	Diesel-Engines	Dry cooling	Air	Diesel	NA	82.5098	57.7568	47.8333	-22.35	By the size and fuel, it must be a small MCI generator
30149	MADAGASCAR	VOLOBE	6.8	5912.1	40202.3	Hydropower	ROR	NA	NA	NA	NA	NA	60316.9	60316.9	49.3833	-18.1667	ROR
30150	MADAGASCAR	VONDROZO	0.059	1819	107.321	Oil	ICE	Diesel-Engines	Dry cooling	Air	Diesel	NA	34.772	24.3404	47.2833	-22.8167	By the size and fuel, it must be a small MCI generator
31001	MALAWI	CHICHIRI (BLANTYRE)	15.5	4390.6	68054.3	NG	ICE	Gas-Engines	Dry cooling	Air	Natural Gas	NA	22049.6	15434.7	35.0993	-15.7549	https://database.earth/energy/power-plant/chichiri-blantyre
31002	MALAWI	CHITIPA	0.3	2750	825	Oil	ICE	Diesel-Engines	Dry cooling	Air	Diesel	NA	267.3	187.11	33.2697	-9.70237	By the size and fuel, it must be a small MCI generator
31003	MALAWI	CHIZUMULU ISLAND	0.3	2750	825	Oil	ICE	Diesel-Engines	Dry cooling	Air	Diesel	NA	267.3	187.11	34.7354	-12.0584	Out of operation in 2021. By the size and fuel, it must be a small MCI generator
31004	MALAWI	DWANGWA MILL	7	4317	30219	Biomass	Rankine	Steam Turbine	No cooling	NA	Sugarcane	NA	4902.49	3431.74	34.1497	-12.499	No cooling. Sugar mill. Surface water
31005	MALAWI	DWANGWA MILL	1.2	2750	3300	Oil	ICE	Diesel-Engines	Dry cooling	Air	Diesel	NA	1069.2	748.439	34.15	-12.5667	Probably a backup plant for the biomass plant.
31006	MALAWI	KAPICHIRA	128.8	5528.2	712032	Hydropower	Dammed	NA	NA	NA	NA	NA	780295	780295	34.7541	-15.8953	ROR
31007	MALAWI	KARONGA	1	2750	2750	Oil	ICE	Diesel-Engines	Dry cooling	Air	Diesel	NA	890.999	623.7	33.9333	-9.93333	Likely the backup installation for the Wovwe power station (hydro) https://www.egenco.mw/wovwe-power-station/
31008	MALAWI	KAYELEKERA MINE	60	2750	165000	Oil	ICE	Diesel-Engines	Dry cooling	Air	Diesel	NA	53460	37422	33.7013	-9.99467	A group of at least fice ICE diesel engines
31009	MALAWI	LIKOMA ISLAND	0.75	2750	2062.5	Oil	ICE	Diesel-Engines	Dry cooling	Air	Diesel	NA	668.249	467.775	34.7354	-12.0584	Out of operation in 2021. By the size and fuel, it must be a small MCI generator
31010	MALAWI	LILONGWE	1.34	2750	3685	Oil	ICE	Diesel-Engines	Dry cooling	Air	Diesel	NA	1193.94	835.757	33.7872	-13.9669	By the size and fuel, it must be a small MCI generator
31011	MALAWI	MTUNTHAMA	0.29	2750	797.5	Oil	ICE	Diesel-Engines	Dry cooling	Air	Diesel	NA	258.39	180.873	33.67	-13.0182	Out of operation in 2024. By the size and fuel, it must be a small MCI generator
31012	MALAWI	MZUZU	1.1	2750	3025	Oil	ICE	Diesel-Engines	Dry cooling	Air	Diesel	NA	980.099	686.069	34.0207	-11.4656	Hotel. Assumed Diesel generator due to its size and fuel.
31013	MALAWI	NCHALO MILL	10	4317	43170	Biomass	Rankine	Steam Turbine	No cooling	NA	Sugarcane	NA	7003.55	4902.49	34.8931	-16.2539	No cooling. Sugar mill. Near river.
31014	MALAWI	NCHALO MILL	0.2	2750	550	Oil	ICE	Diesel-Engines	Dry cooling	Air	Diesel	NA	178.2	124.74	35	-15.7833	By the size and fuel, it must be a small MCI generator
31015	MALAWI	NKULA-A	24	5528.2	132677	Hydropower	ROR	NA	NA	NA	NA	NA	883.023	883.023	34.826	-15.5193	ROR
31016	MALAWI	NKULA-B	100	5528.2	552820	Hydropower	Dammed	NA	NA	NA	NA	NA	431323	431323	34.826	-15.5193	ROR
31017	MALAWI	RUO	8.25	5528.2	45607.7	Hydropower	ROR	NA	NA	NA	NA	NA	883.143	883.143	35.6579	-15.9116	ROR. https://en.wikipedia.org/wiki/Ruo%E2%80%93Ndiza_Hydroelectric_Power_Station
31018	MALAWI	TEDZANI FALLS	110.7	4574.3	506375	Hydropower	Dammed	NA	NA	NA	NA	NA	0	0	34.7833	-15.55	Gravity. New installation of 18 MW in 2020. https://en.wikipedia.org/wiki/List_of_power_stations_in_Malawi
31019	MALAWI	ULIWA	0.057	5528.2	315.107	Hydropower	ROR	NA	NA	NA	NA	NA	0	0	34.85	-8.6	ROR (very small)
31020	MALAWI	WOVWE	4.35	5528.2	24047.7	Hydropower	ROR	NA	NA	NA	NA	NA	1523.07	1523.07	34.1307	-10.3099	ROR
32001	MALI	AIOUN	0.48	2183	1047.84	Oil	ICE	Diesel-Engines	Dry cooling	Air	Diesel	NA	339.5	237.65	-9.6149	16.6614	By the size and fuel, it must be a small MCI generator
32002	MALI	BALINGUE	24.3	2183	53046.9	Oil	ICE	Diesel-Engines	Dry cooling	Air	HFO	NA	17187.2	12031	-7.96162	12.6447	Diesel engines in the Balingue Complex. This was the first power plant in the complex. https://openinframap.org/stats/area/Mali/plants/201959400
32003	MALI	BALINGUE NEW	60	2183	130980	Oil	ICE	Diesel-Engines	Dry cooling	Air	HFO	NA	42437.5	29706.2	-7.96142	12.6455	Diesel engines in the Balingue Complex. This was the second power plant in the complex. https://openinframap.org/stats/area/Mali/plants/201959400
32004	MALI	BOUGOUNI	0.6	2183	1309.8	Oil	ICE	Diesel-Engines	Dry cooling	Air	Diesel	NA	424.375	297.062	-7.47899	11.417	By the size and fuel, it must be a small MCI generator
32005	MALI	FELOU WEIR	62.3	6001.1	373869	Hydropower	ROR	NA	NA	NA	NA	NA	1.55095e+07	1.55095e+07	-11.4438	14.4552	ROR. Raplaced old station in 2014. https://en.wikipedia.org/wiki/F%C3%A9lou_Hydroelectric_Plant
32006	MALI	GAO	4	2183	8732	Oil	ICE	Diesel-Engines	Dry cooling	Air	Diesel	NA	2829.17	1980.42	-0.0104991	16.2498	Diesel engines for the airport of GAO
32007	MALI	KIMPARANA	0.072	2013.9	145.001	Sun	PV	Rooftop	No cooling	NA	Flat	Aw - Tropical Savannah	2.03088	1.42162	-4.9199	12.8402	https://pubs.naruc.org/pub.cfm?id=5370A2A4-2354-D714-5196-4366ECAC7A82 City. I cannot see it, but for its size I assume rooftop
32008	MALI	KITA	1.2	2183	2619.6	Oil	ICE	Diesel-Engines	Dry cooling	Air	Diesel	NA	848.75	594.125	-9.4895	13.0349	By the size and fuel, it must be a small MCI generator
32009	MALI	KITA/KANGABA	50	1622.9	81145	Sun	PV	Land	No cooling	NA	Flat	Aw - Tropical Savannah	7986.35	5590.44	-9.52341	13.0287	Forest. Operational in 2020. https://en.wikipedia.org/wiki/Kita_Solar_Power_Station
32010	MALI	KOLONDIEBA	0.15	1622.9	243.435	Sun	PV	Land	No cooling	NA	Flat	Aw - Tropical Savannah	23.959	16.7713	-6.89295	11.0871	City.
32011	MALI	KOULIKORO MILL	5	2183	10915	Oil	ICE	Diesel-Engines	Dry cooling	Air	Diesel	NA	3536.46	2475.52	-7.60514	12.8301	Diesel engines for the Mill (the name is Grand Moulin du Mali)
32012	MALI	KOUTIALA	0.49	2183	1069.67	Oil	ICE	Diesel-Engines	Dry cooling	Air	Diesel	NA	346.573	242.601	-5.46421	12.3917	By the size and fuel, it must be a small MCI generator
32013	MALI	MANANTALI	205	6001.1	1.23023e+06	Hydropower	Dammed	NA	NA	NA	NA	NA	4.50334e+07	4.50334e+07	-10.4295	13.1959	Reservoir
32014	MALI	MONTEALA (Segou)	1.5	2183	3274.5	Oil	ICE	Diesel-Engines	Dry cooling	Air	Diesel	NA	1060.94	742.656	-6.2157	13.4317	By the size and fuel, it must be a small MCI generator
32015	MALI	MOPTI	6.2	2183	13534.6	Oil	ICE	Diesel-Engines	Dry cooling	Air	Diesel	NA	4385.21	3069.64	-4.09461	14.5126	Group of diesel engines in the next village (Sévaré)
32016	MALI	NIONO	2.121	2183	4630.14	Oil	ICE	Diesel-Engines	Dry cooling	Air	Diesel	NA	1500.17	1050.12	-5.993	14.2526	By its size and fuel I assume it is an ICE with diesel
32017	MALI	OURIKELA	0.05	1622.9	81.145	Sun	PV	Rooftop	No cooling	NA	Flat	Aw - Tropical Savannah	1.13652	0.795563	-5.06281	12.1096	City. I cannot see it, but for its size I assume rooftop
32018	MALI	PAPOURAH	3.7	2183	8077.1	Oil	ICE	Diesel-Engines	Dry cooling	Air	Diesel	NA	2616.98	1831.88	-11.4641	14.4504	Diesel engines in the fuel depot
32019	MALI	RANDGOLD MORILA MINE	34.15	2183	74549.4	Oil	ICE	Diesel-Engines	Dry cooling	Air	Diesel	NA	24154	16907.8	-6.83595	11.6798	One large building with five chimneys. Diesel engines
32020	MALI	SADIOLA MINE	35.584	2183	77679.9	Oil	ICE	Diesel-Engines	Dry cooling	Air	Diesel	NA	25168.3	17617.8	-11.7	13.8833	Movable diesel engines in the mine
32021	MALI	SEGALA GOLD MINE	18	2183	39294	Oil	ICE	Diesel-Engines	Dry cooling	Air	Diesel	NA	12731.2	8911.87	-11.188	12.9475	One large building with five chimneys. Diesel engines
32022	MALI	SELINGUE	47.64	6001.1	285892	Hydropower	Dammed	NA	NA	NA	NA	NA	0	0	-8.2295	11.6388	Reservoir
32023	MALI	SIKASSO	6.032	2183	13167.9	Oil	ICE	Diesel-Engines	Dry cooling	Air	Diesel	NA	4266.38	2986.47	-5.6697	11.3135	Hotel. I cannot see any additional infrastructure that would justify the presence of other type of power plants. Likely a group of diesel engines for the town
32024	MALI	SIRAKORBOUGOU	0.003	6001.1	18.0033	Hydropower	ROR	NA	NA	NA	NA	NA	0	0	-8.2754	13.3167	ROR (very small)
32025	MALI	SIRAKORO	56	2183	122248	Oil	ICE	Diesel-Engines	Dry cooling	Air	HFO	NA	39608.3	27725.8	-7.89387	12.5821	Dry cooling. Rack of fans. The new power plant of 100 MW was connected late 2022. https://www.africa-energy.com/live-data/article/mali-sirakoro-heavy-fuel-oil-plant-commissioned http://www.pdp-energy.com/projects/sirakoro-100-mw-power-plant/
32026	MALI	SOMILO GOLD MINE	41.85	2183	91358.6	Oil	ICE	Diesel-Engines	Dry cooling	Air	HFO	NA	29600.1	20720.1	-11.4066	13.097	Three buildings (phases) of the diesel engines powering the gold mine.
32027	MALI	SOTUBA	5.7	6001.1	34206.3	Hydropower	ROR	NA	NA	NA	NA	NA	0	0	-7.91717	12.6612	ROR
32028	MALI	SUKALA PLANTATION	1	2183	2183	Oil	ICE	Diesel-Engines	Dry cooling	Air	Diesel	NA	707.291	495.104	-6.4084	12.7021	Sugar plantation. Likely the diesel generator of the mill https://ejatlas.org/conflict/nsukala-sugar-plantation-and-refinery-in-cercle-de-segou-mali
32029	MALI	SYAMA GOLD PROJECT	27.86	2183	60818.4	Oil	ICE	Diesel-Engines	Dry cooling	Air	Diesel	NA	19705.1	13793.6	-6.06011	10.7924	Until 2020 movable diesel engines. After 2021 a new building with the diesel engines
32030	MALI	TABAKOTO GOLD MINE	22.38	2183	48855.5	Oil	ICE	Diesel-Engines	Dry cooling	Air	Diesel	NA	15829.2	11080.4	-11.0664	13.0659	Freshwater pumped to the location trough 2 pipelines from the Faleme river. Diesel engines https://www.mining-technology.com/projects/tabakoto-gold-mine/
32031	MALI	TOMBOCTOU	1.87	2183	4082.21	Oil	ICE	Diesel-Engines	Dry cooling	Air	Diesel	NA	1322.63	925.844	-3.00742	16.7735	By its size and fuel I assume it is an ICE with diesel
32032	MALI	YATELA MINE	9.6	2183	20956.8	Oil	ICE	Diesel-Engines	Dry cooling	Air	Diesel	NA	6790	4753	-11.745	14.0808	Diesel engines under a roof for the mining operations
33001	MAURITANIA	AIOUN TOWN	2.1	1626	3414.6	Sun	PV	Land	No cooling	NA	Flat	BWh - Desert Hot	336.067	235.247	-9.54288	16.6521	Desert. Operational in 2016. https://www.ccc.net/project/16-6-mw-solar-photovoltaic-power-plants/
33002	MAURITANIA	AKJOUJT	5.2	1912	9942.4	Oil	ICE	Diesel-Engines	Dry cooling	Air	Diesel	NA	3221.34	2254.93	-14.4221	19.7524	innitial group of diesel engines for the Copper mine. Dry cooling
33003	MAURITANIA	AKJOUJT TOWN	3.4	1626	5528.4	Sun	PV	Land	No cooling	NA	Flat	BWh - Desert Hot	544.109	380.876	-14.4004	19.7466	Desert.
33004	MAURITANIA	AL SHAMI TOWN	2.1	1626	3414.6	Sun	PV	Land	No cooling	NA	Flat	BWh - Desert Hot	336.067	235.247	-15.7148	20.421	Desert. Cannot find it, but for its size and place Desert and Land
33005	MAURITANIA	ALEG	0.43	1912	822.16	Oil	ICE	Diesel-Engines	Dry cooling	Air	Diesel	NA	266.38	186.466	-13.9209	17.0481	By the size and fuel, it must be a small MCI generator
33006	MAURITANIA	ALEG TOWN	2	1626	3252	Sun	PV	Land	No cooling	NA	Flat	BWh - Desert Hot	320.064	224.045	-13.9007	17.0546	Desert.
33007	MAURITANIA	ATAR	3.5	1912	6692	Oil	ICE	Diesel-Engines	Dry cooling	Air	Diesel	NA	2168.21	1517.74	-13.0555	20.5139	Diesel engines for the Atar village
33008	MAURITANIA	ATAR TOWN	2	1626	3252	Sun	PV	Land	No cooling	NA	Flat	BWh - Desert Hot	320.064	224.045	-13.0556	20.5171	Desert.
33009	MAURITANIA	BENI CHAB	2	1626	3252	Sun	PV	Land	No cooling	NA	Flat	BWh - Desert Hot	320.064	224.045	-15.4024	19.3879	Extremely sandy. Satellite imaging are always blocked by a veil of sand
33010	MAURITANIA	BIR MOGHREIN	0.08	1912	152.96	Oil	ICE	Diesel-Engines	Dry cooling	Air	Diesel	NA	49.559	34.6913	-11.5793	25.2213	By the size and fuel, it must be a small MCI generator
33011	MAURITANIA	BOULENOUAR TOWN	2	1626	3252	Sun	PV	Land	No cooling	NA	Flat	BWh - Desert Hot	320.064	224.045	-16.5334	21.2954	Desert.
33012	MAURITANIA	BOUTILIMIT	0.405	1912	774.36	Oil	ICE	Diesel-Engines	Dry cooling	Air	Diesel	NA	250.892	175.625	-14.6944	17.5467	By the size and fuel, it must be a small MCI generator
33013	MAURITANIA	BOUTILIMIT TOWN	1	1626	1626	Sun	PV	Land	No cooling	NA	Flat	BWh - Desert Hot	160.032	112.022	-14.707	17.5329	Desert.
33014	MAURITANIA	CHINGUITTY	0.4	1912	764.8	Oil	ICE	Diesel-Engines	Dry cooling	Air	Diesel	NA	247.795	173.457	-12.2622	20.4404	By the size and fuel, it must be a small MCI generator
33015	MAURITANIA	GUELB MOGHREIN MINE	23.04	1912	44052.5	Oil	ICE	Diesel-Engines	Dry cooling	Air	Diesel	NA	14273	9991.09	-14.4207	19.752	Copper mine. Diesel engines for the minning process
33016	MAURITANIA	GUELBS EL RHEIN	77.6	1912	148371	Oil	ICE	Diesel-Engines	Dry cooling	Air	Diesel	NA	48072.2	33650.6	-12.3015	22.8777	Diesel power plants for the mine
33017	MAURITANIA	GUEROU	0.395	1912	755.24	Oil	ICE	Diesel-Engines	Dry cooling	Air	Diesel	NA	244.698	171.288	-11.8359	16.8177	By the size and fuel, it must be a small MCI generator
33018	MAURITANIA	KIFFA	5	1912	9560	Oil	ICE	Diesel-Engines	Dry cooling	Air	HFO	NA	3097.44	2168.21	-11.5078	16.6678	Simmilar than NEMA hybrid, one fossil fuel power plant with ICE, next to a group of PV panels. No really hybrid. Dry cooling. https://www.abccontracting.be/en/projets/kiffa-hybrid-power-plant/
33019	MAURITANIA	KIFFA	1.3	1626	2113.8	Sun	PV	Land	No cooling	NA	Flat	BWh - Desert Hot	208.042	145.629	-11.5079	16.6675	Desert. https://www.abccontracting.be/en/projets/kiffa-hybrid-power-plant/
33020	MAURITANIA	MAQTAA LEHJAR	0.15	1912	286.8	Oil	ICE	Diesel-Engines	Dry cooling	Air	Diesel	NA	92.9231	65.0462	-13.0927	17.506	By the size and fuel, it must be a small MCI generator
33021	MAURITANIA	MBOUT	0.28	1912	535.36	Oil	ICE	Diesel-Engines	Dry cooling	Air	Diesel	NA	173.457	121.42	-12.5838	16.0216	By the size and fuel, it must be a small MCI generator
33022	MAURITANIA	NEMA	5	1912	9560	Oil	ICE	Diesel-Engines	Dry cooling	Air	HFO	NA	3097.44	2168.21	-7.28749	16.5994	It is next to a group of PV panels. They calle it hybrid, but actually they are two power plants connected to each other, being the fossil fuel the largest. https://www.gopa-intec.de/news/inauguration-nema-hybrid-power-plant-mauritania
33023	MAURITANIA	NEMA	0.78	1626	1268.28	Sun	PV	Land	No cooling	NA	Flat	BWh - Desert Hot	124.825	87.3775	-7.28672	16.599	Desert. Operational in 2018. https://www.gopa-intec.de/news/inauguration-nema-hybrid-power-plant-mauritania
33024	MAURITANIA	NOUADHIBOU SMCP	0.45	1912	860.4	Oil	ICE	Diesel-Engines	Dry cooling	Air	Diesel	NA	278.769	195.139	-17.06	20.9	By the size and fuel, it must be a small MCI generator
33025	MAURITANIA	NOUADHIBOU SNIM	60	1912	114720	Oil	ICE	Diesel-Engines	Dry cooling	Air	Crude Oil	NA	37169.3	26018.5	-17.0573	20.8954	Coast. https://www.gem.wiki/Nouadhibou_Thermal_power_plant
33026	MAURITANIA	NOUADHIBOU SNIM	4.5	3032	13644	Wind	Wind turbine	Onshore	No cooling	NA	NA	NA	0.00180769	0.00180769	-17.0506	20.8471	http://wikimapia.org/29552759/Nouadhibou-wind-power-plant
33027	MAURITANIA	NOUADHIBOU SOMELEC	60	1912	114720	Oil	ICE	Diesel-Engines	Dry cooling	Air	Crude Oil	NA	37169.3	26018.5	-17.0573	20.8954	Coast. https://www.gem.wiki/Nouadhibou_Thermal_power_plant
33028	MAURITANIA	NOUAKCHOTT	48	1912	91776	Oil	ICE	Diesel-Engines	Dry cooling	Air	Diesel	NA	29735.4	20814.8	-15.975	18.0461	Diesel engines. The images of satellite and pictures nearby indicate this is a four unit of 7 MW each
33029	MAURITANIA	NOUAKCHOTT	15	1626	24390	Sun	PV	Land	No cooling	NA	Flat	BWh - Desert Hot	2400.48	1680.34	-15.9839	18.1524	Extremely sandy. Satellite imaging are always blocked by a veil of sand
33030	MAURITANIA	NOUAKCHOTT SOUTHWEST	51.8	1912	99041.6	Oil	ICE	Diesel-Engines	Dry cooling	Air	Diesel	NA	32089.5	22462.6	-16.0204	18.0465	Diesel engines. The images of satellite and pictures nearby indicate this is a four unit of 7 MW each
33031	MAURITANIA	NOUAKCHOTT SPEG	180	1912	344160	Oil	ICE	Diesel-Engines	Dry cooling	Air	Diesel	NA	111508	78055.4	-15.9842	18.1528	Diesel engines. The images of satellite and pictures nearby indicate this is a 180 MW diesel power plant.
33032	MAURITANIA	NOUAKCHOTT WIND	30	3032	90960	Wind	Wind turbine	Onshore	No cooling	NA	NA	NA	0.0120512	0.0120512	-15.9851	17.9651	https://www.gem.wiki/Nouakchott_wind_farm
33033	MAURITANIA	OUALATA	0.115	1912	219.88	Oil	ICE	Diesel-Engines	Dry cooling	Air	Diesel	NA	71.2411	49.8687	-7.0256	17.3014	By the size and fuel, it must be a small MCI generator
33034	MAURITANIA	RACHID	0.08	1912	152.96	Oil	ICE	Diesel-Engines	Dry cooling	Air	Diesel	NA	49.559	34.6913	-11.6817	18.7933	By the size and fuel, it must be a small MCI generator
33035	MAURITANIA	SELIBABY	0.32	1912	611.84	Oil	ICE	Diesel-Engines	Dry cooling	Air	Diesel	NA	198.236	138.765	-12.1829	15.1589	By the size and fuel, it must be a small MCI generator
33036	MAURITANIA	SHEIKH ZAYED SOLAR	15.2	1626	24715.2	Sun	PV	Land	No cooling	NA	Flat	BWh - Desert Hot	2432.49	1702.74	-15.9842	18.1528	Extremely sandy. Satellite imaging are always blocked by a veil of sand
33037	MAURITANIA	TAMCHEKETT	0.16	1912	305.92	Oil	ICE	Diesel-Engines	Dry cooling	Air	Diesel	NA	99.118	69.3826	-10.6706	17.2422	By the size and fuel, it must be a small MCI generator
33038	MAURITANIA	TASIAST MINE	60	1912	114720	Oil	ICE	Diesel-Engines	Dry cooling	Air	Diesel	NA	37169.3	26018.5	-15.5295	20.5404	Gold mine. Racks of fans for dry cooling. Groundwater, no surface water nearby
33039	MAURITANIA	TIDJIKDJA	1.5	1912	2868	Oil	ICE	Diesel-Engines	Dry cooling	Air	Diesel	NA	929.231	650.462	-11.4272	18.5564	Likely a group of diesel generators. https://ami.mr/en/archives/8326
33040	MAURITANIA	TIMBEDRA	0.245	1912	468.44	Oil	ICE	Diesel-Engines	Dry cooling	Air	Diesel	NA	151.774	106.242	-8.1643	16.2447	By the size and fuel, it must be a small MCI generator
33041	MAURITANIA	TINTANE	0.235	1912	449.32	Oil	ICE	Diesel-Engines	Dry cooling	Air	Diesel	NA	145.58	101.906	-10.1737	16.3946	By the size and fuel, it must be a small MCI generator
33042	MAURITANIA	ZOUERATE	14.4	1912	27532.8	Oil	ICE	Diesel-Engines	Dry cooling	Air	Diesel	NA	8920.62	6244.43	-12.471	22.716	Iron ore mine. Power plant of diesel engines. No surface water.
34001	MAURITIUS	BAMBOUS (LA FERME)	15.2	1464	22252.8	Sun	PV	Land	No cooling	NA	Flat	Af - Tropical Rainforest	2190.14	1533.1	57.4308	-20.2612	Forest, near a Lake. https://aera-group.fr/project/first-ever-solar-pv-project-in-the-indian-ocean/
34002	MAURITIUS	BELLE VUE	70	5686	398020	Biomass	Rankine	Steam Turbine	Wet tower	Freshwater	Sugarcane and Coal	Af - Tropical Rainforest	1.808e+06	1.65734e+06	57.5942	-20.0658	Bagasse from July till January, coal rest of the year (cooling tower with coal, no cooling with bagasse). https://www.gem.wiki/Terragen_power_station. Check to avoid double counting!
34003	MAURITIUS	BELLE VUE	70	4913	343910	Coal	Rankine	Steam Turbine	Wet tower	Freshwater	Pulverized Coal - Subcritical, Sugarcane	Af - Tropical Rainforest	1.56221e+06	1.43203e+06	57.5981	-20.0668	Bagasse from July till January, coal rest of the year (cooling tower with coal, no cooling with bagasse). https://www.gem.wiki/Terragen_power_station. Check to avoid double counting!
34004	MAURITIUS	BOIS CHERIE	0.1	1639.2	163.92	Hydropower	ROR	NA	NA	NA	NA	NA	0	0	57.5325	-20.4194	ROR (very small)
34005	MAURITIUS	CASCADE CECILE	1	1639.2	1639.2	Hydropower	ROR	NA	NA	NA	NA	NA	0	0	57.7839	-20.2759	ROR
34006	MAURITIUS	CHAMPAGNE MAURITIUS	30	1639.2	49176	Hydropower	Dammed	NA	NA	NA	NA	NA	215498	215498	57.6767	-20.3375	Reservoir and pipe connection. https://www.waterpowermagazine.com/news/newspower-plans-in-mauritius
34007	MAURITIUS	CTDS	35	5686	199010	Biomass	Rankine	Steam Turbine	Wet Tower	Freshwater	Sugarcane	Af - Tropical Rainforest	904002	828668	57.5426	-20.5081	Only for power generation. No sugar. Cooling towers. River nearby. Bagasse and coal. Assumed July toll January. https://www.gem.wiki/Saint-Aubin_power_station Check to avoid double counting!
34008	MAURITIUS	CTDS	35	4913	171955	Coal	Rankine	Steam Turbine	Wet tower	Freshwater	Pulverized Coal - Subcritical, Sugarcane	Af - Tropical Rainforest	781105	716013	57.5426	-20.5081	Only for power generation. No sugar. Cooling towers. River nearby. Bagasse and coal. Assumed July toll January. https://www.gem.wiki/Saint-Aubin_power_station Check to avoid double counting!
34009	MAURITIUS	DEEP RIVER	28.65	5686	162904	Biomass	Rankine	Steam Turbine	No cooling	NA	Sugarcane	NA	26428.2	18499.8	57.7567	-20.2753	Near river. Sugar factory. No cooling
34010	MAURITIUS	FERNEY	10	1639.2	16392	Hydropower	Dammed	NA	NA	NA	NA	NA	0	0	57.6794	-20.3651	ROR
34011	MAURITIUS	FORT GEORGE	139	2424	336936	Oil	ICE	Diesel-Engines	Dry cooling	Air	Diesel	NA	109167	76417	57.4928	-20.1457	Diesel engines
34012	MAURITIUS	FORT VICTORIA-1	19.6	2424	47510.4	Oil	ICE	Diesel-Engines	Dry cooling	Air	Diesel	NA	15393.4	10775.4	57.5	-20.17	MAN Diesel engines. https://ceb.mu/our-activities/power-stations/fort-victoria-power-station
34013	MAURITIUS	FORT VICTORIA-2	90	2424	218160	Oil	ICE	Diesel-Engines	Dry cooling	Air	Diesel	NA	70683.8	49478.6	57.4708	-20.1597	Wartsila Diesel engines. https://ceb.mu/our-activities/power-stations/fort-victoria-power-station
34014	MAURITIUS	FUEL SUGAR	40.5	5686	230283	Biomass	Rankine	Steam Turbine	Wet tower	Freshwater	Sugarcane	Af - Tropical Rainforest	1.04606e+06	958888	57.6926	-20.2121	Forced flow cooling towers.
34015	MAURITIUS	GRENADE	1.1	2036.4	2240.04	Wind	Wind turbine	Onshore	No cooling	NA	NA	NA	0.000296782	0.000296782	63.4272	-19.7026	https://www.contentree.com/caseStudy/grenade-wind-park-rodrigues-island-mauritus_171284
34016	MAURITIUS	HIGHLANDS ESTATE	2.2	5686	12509.2	Biomass	Rankine	Steam Turbine	No cooling	NA	Sugarcane	NA	2029.39	1420.57	57.5022	-20.2867	Sugarcane Estate. I assume it is a sugarcane mill. No cooling. https://en.wikipedia.org/wiki/List_of_sugar_mills_in_Mauritius
34017	MAURITIUS	HIGHLANDS ESTATE	0.4	1639.2	655.68	Hydropower	ROR	NA	NA	NA	NA	NA	0	0	57.5022	-20.2867	ROR (very small)
34018	MAURITIUS	LA FERME RESERVOIR	1.2	1639.2	1967.04	Hydropower	Dammed	NA	NA	NA	NA	NA	0	0	57.4147	-20.2619	ROR
34019	MAURITIUS	LA NICOLIERE FEEDER	0.35	1639.2	573.72	Hydropower	ROR	NA	NA	NA	NA	NA	0	0	57.6	-20.1308	ROR (very small)
34020	MAURITIUS	LE VAL (EAU BLEUE)	4	1639.2	6556.8	Hydropower	Dammed	NA	NA	NA	NA	NA	0	0	57.6154	-20.348	Reservoir
34021	MAURITIUS	MAGENTA TAMARIN	0.94	1639.2	1540.85	Hydropower	ROR	NA	NA	NA	NA	NA	0	0	57.3706	-20.3256	Reservoir
34022	MAURITIUS	MARE CHICOSE LANDFILL	3.3	5686	18763.8	Biomass	ICE	Gas-Engines	Dry cooling	Air	Biogas - Landfill	NA	6079.47	4255.63	57.6299	-20.3858	Methane gas of the landfill to electricity. http://www.sotravic.net/about-us/project-6-mare-chicose-landfill-gas-to-energy-project.html
34023	MAURITIUS	MDA MILL	11.2	5686	63683.2	Biomass	Rankine	Steam Turbine	No cooling	NA	Sugarcane	NA	10331.4	7232.01	57.6791	-20.4549	No cooling. Mon Desert Alma (MDA). Looks abandoned.
34024	MAURITIUS	MEDINE MILL	21.7	5686	123386	Biomass	Rankine	Steam Turbine	No cooling	NA	Sugarcane	NA	20017.2	14012	57.5	-20.17	No cooling. https://www.power-technology.com/marketdata/power-plant-profile-medine-sugar-cogeneration-plant-mauritius/?cf-view
34025	MAURITIUS	MIDLAND DAM	0.35	1639.2	573.72	Hydropower	ROR	NA	NA	NA	NA	NA	0	0	57.6	-20.1308	ROR (very small)
34026	MAURITIUS	MON LOISIR	12	5686	68232	Biomass	Rankine	Steam Turbine	No cooling	NA	Sugarcane	NA	11069.4	7748.59	57.6805	-20.1129	No cooling. Sugar factory
34027	MAURITIUS	MON TRESOR	12.5	5686	71075	Biomass	Rankine	Steam Turbine	No cooling	NA	Sugarcane	NA	11530.6	8071.44	57.6717	-20.4467	No cooling. Sugar factory
34028	MAURITIUS	MOUNT SUGAR	2.25	5686	12793.5	Biomass	Rankine	Steam Turbine	No cooling	NA	Sugarcane	NA	2075.51	1452.86	57.574	-20.0977	No cooling. Now called L'aventure du sucre
34029	MAURITIUS	NEW GOVERNMENT BUILDING	0.076	1464	111.264	Sun	PV	Rooftop	No cooling	NA	Flat	Af - Tropical Rainforest	1.55837	1.09086	57.5035	-20.1627	City.
34030	MAURITIUS	NICOLAY	75	2736	205200	NG	Brayton	Gas Turbine	No cooling	NA	Natural Gas	NA	330126	264101	57.5125	-20.1522	Coast. https://www.openstreetmap.org/way/170362028#map=13/-20.1651/57.5455
34031	MAURITIUS	PLAINE DES ROCHES	9.3	1612.9	15000	Wind	Wind turbine	Onshore	No cooling	NA	NA	NA	0.00198734	0.00198734	57.7293	-20.1333	Operational in 2016. https://www.qair.energy/en/realisations/mauritius/plainedesroches/
34032	MAURITIUS	POINTE MONNIER	6.5	2424	15756	Oil	ICE	Diesel-Engines	Dry cooling	Air	Diesel	NA	5104.94	3573.46	63.4136	-19.6828	Diesel engines. https://www.openstreetmap.org/way/300918864#map=15/-19.6931/63.4341
34033	MAURITIUS	PORT MATHURIN	6	2424	14544	Oil	ICE	Diesel-Engines	Dry cooling	Air	Diesel	NA	4712.25	3298.58	63.4185	-19.682	Diesel engines
34034	MAURITIUS	REDUIT REBUILD	1.2	1639.2	1967.04	Hydropower	Dammed	NA	NA	NA	NA	NA	0	0	57.4906	-20.2386	ROR
34035	MAURITIUS	RICHE-EN-EAU	9.2	5686	52311.2	Biomass	Rankine	Steam Turbine	No cooling	NA	Sugarcane	NA	8486.55	5940.58	57.6556	-20.3847	Sugarcane Estate. I assume it is a sugarcane mill. No cooling. https://en.wikipedia.org/wiki/List_of_sugar_mills_in_Mauritius
34036	MAURITIUS	RICHE-EN-EAU	0.2	819.6	163.92	Hydropower	ROR	NA	NA	NA	NA	NA	0	0	57.6556	-20.3847	ROR. https://www.waterpowermagazine.com/news/newspower-plans-in-mauritius
34037	MAURITIUS	SAINT LOUIS CEB	110	2424	266640	Oil	ICE	Diesel-Engines	Dry cooling	Air	Diesel	NA	86391.3	60473.9	57.5	-20.17	Wartsila diesel engines. https://ceb.mu/our-activities/power-stations/st-louis-power-station
34038	MAURITIUS	SAVANNAH ESTATE	15.3	5686	86995.8	Biomass	Rankine	Steam Turbine	Wet tower	Freshwater	Sugarcane	Af - Tropical Rainforest	395178	362246	57.6271	-20.471	Forced flow cooling towers. Next to Savannah estate coal
34039	MAURITIUS	SAVANNAH ESTATE SIDEC (La Baraque)	90	4913	442170	Coal	Rankine	Steam Turbine	Wet tower	Freshwater	Pulverized Coal - Subcritical	Af - Tropical Rainforest	2.00855e+06	1.84118e+06	57.6271	-20.4706	Forced flow cooling towers. https://www.gem.wiki/Savannah_power_station
34040	MAURITIUS	ST-FELIX	0.1	1639.2	163.92	Hydropower	ROR	NA	NA	NA	NA	NA	0	0	57.5664	-20.4867	ROR (very small)
34041	MAURITIUS	TAMARIN FALLS	11.383	1639.2	18659	Hydropower	Dammed	NA	NA	NA	NA	NA	456379	456379	57.41	-20.35	Gravity
34042	MAURITIUS	THE STATE HOUSE	0.012	1464	17.568	Sun	PV	Rooftop	No cooling	NA	Flat	Af - Tropical Rainforest	0.246058	0.17224	57.4965	-20.2313	City.
34043	MAURITIUS	TREFLES	0.18	1682.2	302.796	Wind	Wind turbine	Onshore	No cooling	NA	NA	NA	4.01173e-05	4.01173e-05	63.4672	-19.6838	Wind farm
34044	MAURITIUS	UNION ST AUBIN	14.7	5686	83584.2	Biomass	Rankine	Steam Turbine	No cooling	NA	Sugarcane	NA	13560	9492.02	57.5424	-20.5021	No cooling towers. Part, but far of https://www.gem.wiki/Saint-Aubin_power_station
34045	MAURITIUS	UNION ST AUBIN	20.3	4913	99733.9	Coal	Rankine	Steam Turbine	Wet tower	Freshwater	Pulverized Coal - Subcritical	Af - Tropical Rainforest	453041	415287	57.55	-20.48	Forced flow cooling towers. https://www.gem.wiki/Saint-Aubin_power_station
35001	MAYOTTE	Badamiers power station	38.1	2424	92354.4	Oil	ICE	Diesel-Engines	Dry cooling	Air	Diesel	NA	29922.8	20946	45.2812	-12.7661	Out of operation in 2023
35002	MAYOTTE	LONGONI	36	2736	98496	NG	ICE	Gas-Engines	Dry cooling	Air	Natural Gas	NA	31912.7	22338.9	45.1686	-12.7319	https://en.wikipedia.org/wiki/Energy_in_Mayotte
35003	MAYOTTE	LONGONI	40	2424	96960	Oil	ICE	Diesel-Engines	Dry cooling	Air	Diesel	NA	31415	21990.5	45.1686	-12.7319	Largest diesel engines power plant in the island. https://www.wartsila.com/media/news/08-03-2007-wartsila-island-power-plant-for-mayotte-in-the-indian-ocean
35004	MAYOTTE	LONGONI	13	1464	19032	Sun	PV	Land	No cooling	NA	Flat	Aw - Tropical Savannah	1873.14	1311.2	45.168	-12.7326	Next to the Longoni diesel power plant
36001	MOROCCO	AFOURER-2	466	939.4	437760	Hydropower	Pump Storage	NA	NA	NA	NA	NA	156461	156461	-6.46667	32.3167	Pumped storage
36002	MOROCCO	AGADIR	66.4	1626	107966	Oil	Brayton	Gas Turbine	No cooling	NA	HFO	NA	173696	138957	-9.63826	30.4326	Group of gas turbines. Likely working with HFO
36003	MOROCCO	AIN BENI MATHAR	300	6005	1801500	NG	Brayton	Gas Turbine	No cooling	NA	Natural Gas	NA	2.89825e+06	2.3186e+06	-2.10529	34.0674	Combined cycle with Gas (300 MW - 83), Heat Recovery (150 MW -82) and CSP (20 MW - 83). Total 470 MW. https://www.gem.wiki/Ain_Beni_Mathar_power_plant https://www.power-technology.com/marketdata/power-plant-profile-ain-beni-mathar-hybrid-power-plant-morocco/?cf-view
36004	MOROCCO	AIN BENI MATHAR	20	2306	46120	Sun	CSP	PT	Dry cooling	Air	NA	BWh - Desert Hot	34916.6	24441.6	-2.10529	34.0674	Combined cycle with Gas (300 MW - 83), Heat Recovery (150 MW -82) and CSP (20 MW - 83). Total 470 MW. https://www.gem.wiki/Ain_Beni_Mathar_power_plant https://www.power-technology.com/marketdata/power-plant-profile-ain-beni-mathar-hybrid-power-plant-morocco/?cf-view
36005	MOROCCO	AIN BENI MATHAR	150	4745.2	711780	waste heat	Rankine	Steam Turbine	Dry cooling	Air	Heat recovery	NA	26943.8	18860.7	-2.10529	34.0674	Combined cycle with Gas (300 MW - 83), Heat Recovery (150 MW -82) and CSP (20 MW - 83). Total 470 MW. https://www.gem.wiki/Ain_Beni_Mathar_power_plant https://www.power-technology.com/marketdata/power-plant-profile-ain-beni-mathar-hybrid-power-plant-morocco/?cf-view
36006	MOROCCO	AIT BAHA CEMENT PLANT	1.8	4745.2	8541.36	waste heat	Rankine	Steam Turbine	Dry cooling	Air	Heat recovery	NA	323.326	226.328	-9.15474	30.2206	Project to reuse the heat from Cement Plant using a ORC rankine Cycle with three dry cooling towers. It was initially included a CSP project that it looks dismantled. https://iea.blob.core.windows.net/assets/imports/events/272/Session2Speaker2revOjanCPD.pdf
36007	MOROCCO	AIT MESSAOUD DAM	8	939.4	7515.2	Hydropower	Dammed	NA	NA	NA	NA	NA	8.47517e+06	8.47517e+06	-5.98987	31.4058	Reservoir
36008	MOROCCO	AKANE VILLAGE	0.007	1626	11.382	Oil	ICE	Diesel-Engines	Dry cooling	Air	Diesel	NA	3.68777	2.58144	-5.1487	35.2705	By its size and fuel I assume it is an ICE with diesel
36009	MOROCCO	AKANE VILLAGE	0.006	2306	13.836	Sun	PV	Rooftop	No cooling	NA	Flat	Csa - Temperate Dry Summer	0.052375	0.0366625	-5.1475	35.2704	Semi-arid.
36010	MOROCCO	AKHFENNIR	202	3361	678922	Wind	Wind turbine	Onshore	No cooling	NA	NA	NA	0.08995	0.08995	-11.9975	27.9538	https://www.gem.wiki/Akhfenir_wind_farm
36011	MOROCCO	AL KANSERA	8.3	939.4	7797.02	Hydropower	ROR	NA	NA	NA	NA	NA	45794.1	45794.1	-5.93	34.27	Reservoir. https://en.wikipedia.org/wiki/El_Kansera_Dam
36012	MOROCCO	AL KOUDIA	50.4	3361	169394	Wind	Wind turbine	Onshore	No cooling	NA	NA	NA	0.022443	0.022443	-5.4538	35.8184	https://www.gem.wiki/Al_Koudia_wind_farm
36013	MOROCCO	AL MASSIRA	128	939.4	120243	Hydropower	Dammed	NA	NA	NA	NA	NA	2.84561e+07	2.84561e+07	-7.5833	32.4583	Reservoir. https://en.wikipedia.org/wiki/Al_Massira_Dam
36014	MOROCCO	AL WAHDA	240	939.4	225456	Hydropower	Dammed	NA	NA	NA	NA	NA	1.37785e+08	1.37785e+08	-5.6	34.8	Reservoir
36015	MOROCCO	ALLAL EL FASSI	240	939.4	225456	Hydropower	Dammed	NA	NA	NA	NA	NA	2.21623e+06	2.21623e+06	-4.83333	33.8333	Reservoir
36016	MOROCCO	AMOUGGUEZ (HASSAN)	67.2	939.4	63127.7	Hydropower	ROR	NA	NA	NA	NA	NA	0	0	-6.4922	31.485	ROR
36017	MOROCCO	ASKAW (Tiouine?)	0.2	939.4	187.88	Hydropower	Dammed	NA	NA	NA	NA	NA	3.99262e+06	3.99262e+06	-7.19843	30.957	Reservoir
36018	MOROCCO	BINE EL OUIDANE	135	939.4	126819	Hydropower	Dammed	NA	NA	NA	NA	NA	9.43799e+06	9.43799e+06	-9.06667	30.7167	Reservoir. https://en.wikipedia.org/wiki/Bine_El_Ouidane_Dam
36019	MOROCCO	BOUAREG (Bouarfa?)	6.4	939.4	6012.16	Hydropower	ROR	NA	NA	NA	NA	NA	21585.8	21585.8	-1.95576	32.5491	ROR
36020	MOROCCO	DAHR SAADANE (Tangier)	140.25	3361	471380	Wind	Wind turbine	Onshore	No cooling	NA	NA	NA	0.0624529	0.0624529	-5.606	35.6471	https://www.gem.wiki/Tangier_wind_farm
36021	MOROCCO	DAKHLA DECON	3.5	3361	11763.5	Wind	Wind turbine	Onshore	No cooling	NA	NA	NA	0.00155854	0.00155854	-15.9603	23.6781	Wind farm
36022	MOROCCO	DAOURAT	17	939.4	15969.8	Hydropower	ROR	NA	NA	NA	NA	NA	20916.7	20916.7	-8.05	32.93	ROR. https://fr.wikipedia.org/wiki/Barrage_Daourat
36023	MOROCCO	DCHAR EL-OUED	92	939.4	86424.8	Hydropower	Dammed	NA	NA	NA	NA	NA	1.57511e+07	1.57511e+07	-6.46667	32.3167	Reservoir. https://www.gem.wiki/Ahmed_El_Hansali_hydroelectric_plant
36024	MOROCCO	EL BORJ (Tanafit)	40	939.4	37576	Hydropower	ROR	NA	NA	NA	NA	NA	20711.9	20711.9	-5.7	35.71	ROR. https://fr.wikipedia.org/wiki/Barrage_Tanafnit_El_Borj
36025	MOROCCO	EL GUERDANE-2	1.5	939.4	1409.1	Hydropower	ROR	NA	NA	NA	NA	NA	0	0	-7.95111	29.6516	ROR. https://fr.wikipedia.org/wiki/Barrage_Tanafnit_El_Borj
36026	MOROCCO	EL GUERDANE-3	0.5	939.4	469.7	Hydropower	Dammed	NA	NA	NA	NA	NA	461493	461493	-7.95111	29.6516	Reservoir. https://www.gem.wiki/Ahmed_El_Hansali_hydroelectric_plant
36027	MOROCCO	EL GUERDANE-4	1.1	939.4	1033.34	Hydropower	ROR	NA	NA	NA	NA	NA	0	0	-7.95111	29.6516	ROR (very small)
36028	MOROCCO	ERFOUD SOLAR	40	2306	92240	Sun	PV	Land	No cooling	NA	Flat	BSk - Arid Steppe - Cold	9078.33	6354.83	-4.27513	31.5131	Desert. Operational in 2020. https://www.gem.wiki/Noor_Tafilalt_Erfoud_Solar
36029	MOROCCO	ESSAOUIRA (Amougdoul, Tarfayer)	60.35	3361	202836	Wind	Wind turbine	Onshore	No cooling	NA	NA	NA	0.0268737	0.0268737	-9.80317	31.4158	https://www.gem.wiki/Amougdoul_Essaouira_wind_farm
36030	MOROCCO	ESSMARA	0.108	1626	175.608	Oil	ICE	Diesel-Engines	Dry cooling	Air	Diesel	NA	56.8969	39.8279	-6.95222	32.7346	By the size and fuel, it must be a small MCI generator
36031	MOROCCO	FES AVAL	1.89	939.4	1775.47	Hydropower	Dammed	NA	NA	NA	NA	NA	1.13715e+06	1.13715e+06	-5.12864	34.0414	Reservoir
36032	MOROCCO	HAOUMA	50.6	3361	170067	Wind	Wind turbine	Onshore	No cooling	NA	NA	NA	0.022532	0.022532	-5.493	35.8054	https://www.gem.wiki/Haouma_wind_farm
36033	MOROCCO	IDRISS THE FIRST	40	939.4	37576	Hydropower	Dammed	NA	NA	NA	NA	NA	1.46614e+06	1.46614e+06	-4.98278	34.0528	Reservoir
36034	MOROCCO	IMFOUT	31.2	939.4	29309.3	Hydropower	Dammed	NA	NA	NA	NA	NA	9.11598e+06	9.11598e+06	-7.61833	33.0053	Reservoir
36035	MOROCCO	JERADA	165	6571	1084215	Coal	Rankine	Steam Turbine	Wet tower	Freshwater	Pulverized Coal - Subcritical	BSk - Arid Steppe - Cold	4.92504e+06	4.51462e+06	-2.18913	34.3087	Old plant with three sets of Cooling towers. Groundwater. https://fr.wikipedia.org/wiki/Liste_des_centrales_%C3%A9lectriques_au_Maroc https://www.gem.wiki/Jerada_power_station
36036	MOROCCO	JERADA Nouvelle	350	6571	2299850	Coal	Rankine	Steam Turbine	Dry cooling	Air	Pulverized Coal - Supercritical	NA	373109	261176	-2.18913	34.3087	New unit operational in 2017 with dry cooling. https://mapecology.ma/actualites/centrale-thermique-de-jerada-nouvelle-unite-de-350-mw-bientot-operationnelle-standards-internationaux-de-preservation-de-lenvironnement/ https://www.gem.wiki/Jerada_power_station
36037	MOROCCO	JORF LASFAR	2060	6571	13536260	Coal	Rankine	Steam Turbine	Once through	Saline	Pulverized Coal - Subcritical	NA	2.19601e+06	1.53721e+06	-8.63731	33.1046	Coast. Subcritical
36038	MOROCCO	KENITRA	300	1248.5	374550	Oil	Rankine	Steam Turbine	Once through	Freshwater	HFO	Csa - Temperate Dry Summer	4.96239e+07	283565	-6.56177	34.2857	Part of the Kenitra Complex. https://www.power-technology.com/marketdata/power-plant-profile-kenitra-oil-fired-power-plant-morocco/?cf-view
36039	MOROCCO	KENITRA	315	1248.5	393278	Oil	Brayton	Gas Turbine	No cooling	NA	HFO	NA	632705	506164	-6.56022	34.285	Part of the Kenitra Complex. https://www.power-technology.com/data-insights/power-plant-profile-kenitra-gas-turbine-power-plant-morocco/?cf-view https://www.gem.wiki/Kenitra_power_plant
36040	MOROCCO	LALLA TAKERKOUST	8.8	939.4	8266.72	Hydropower	Dammed	NA	NA	NA	NA	NA	6.9237e+06	6.9237e+06	-8.00828	31.6315	Reservoir
36041	MOROCCO	MANSOUR EDDAHBI	10.6	939.4	9957.64	Hydropower	Dammed	NA	NA	NA	NA	NA	3.93148e+06	3.93148e+06	-6.91667	30.9167	Reservoir
36042	MOROCCO	MOHAMMED V	23	939.4	21606.2	Hydropower	Dammed	NA	NA	NA	NA	NA	1.21599e+06	1.21599e+06	-2.32944	34.9211	Reservoir. https://fr.wikipedia.org/wiki/Barrage_Mohamed_V
36043	MOROCCO	MOHAMMEDIA	300	6571	1971300	Coal	Rankine	Steam Turbine	Once through	Saline	Pulverized Coal - Subcritical	NA	319808	223865	-7.43206	33.6825	Part of the Mohammedia Complex. https://fr.wikipedia.org/wiki/Liste_des_centrales_%C3%A9lectriques_au_Maroc https://www.gem.wiki/Mohammedia_power_station
36044	MOROCCO	MOHAMMEDIA	300	1626	487800	Oil	Brayton	Gas Turbine	No cooling	NA	Crude Oil	NA	784773	627818	-7.43635	33.679	Part of the Mohammedia Complex. https://www.gem.wiki/Mohammedia_power_station
36045	MOROCCO	MOHAMMEDIA 2 (gaz)	600	6005	3603000	NG	Brayton	Gas Turbine	No cooling	NA	HFO	NA	5.79651e+06	4.63721e+06	-7.43649	33.679	No cooling. Coast. https://www.gem.wiki/Mohammedia_2_Power_Plant
36046	MOROCCO	MOULAY-YOUSSEF	25	939.4	23485	Hydropower	Dammed	NA	NA	NA	NA	NA	383468	383468	-7	31.73	Reservoir. https://mapcarta.com/fr/W31014085
36047	MOROCCO	NOOR-I	160	2306	368960	Sun	CSP	PT	Wet tower	Freshwater	NA	BWh - Desert Hot	3.79095e+06	2.65366e+06	-6.86855	31.0093	Total water cosumption Noor 3 million m3 per year. Water from Mansour Eddahbi dam (this plant has a wet tower). Operational in 2016. Parabolic trough. Part of Ouarzazate Solar Power Station. https://en.wikipedia.org/wiki/Ouarzazate_Solar_Power_Station
36048	MOROCCO	NOOR-II	191	2306	440446	Sun	CSP	PT	Wet tower	Freshwater	NA	BWh - Desert Hot	4.52545e+06	3.16781e+06	-6.8692	31.0354	Total water cosumption Noor 3 million m3 per year (but this plant only uses it for cleaning). Part of Ouarzazate Solar Power Station. https://en.wikipedia.org/wiki/Ouarzazate_Solar_Power_Station
36049	MOROCCO	NOOR-III	159	2306	366654	Sun	CSP	CT	Wet tower	Freshwater	NA	BWh - Desert Hot	1.70518e+06	1.19363e+06	-6.86908	31.0602	Total water cosumption Noor 3 million m3 per year (but this plant only uses it for cleaning). Part of Ouarzazate Solar Power Station. https://en.wikipedia.org/wiki/Ouarzazate_Solar_Power_Station
36050	MOROCCO	NOOR-IV	72	2306	166032	Sun	PV	Land	No cooling	NA	Flat	BWh - Desert Hot	16341	11438.7	-6.8328	31.0235	Desert
36051	MOROCCO	OUED EL MAKHAZINE	36	939.4	33818.4	Hydropower	Dammed	NA	NA	NA	NA	NA	0	0	-5.8417	34.9417	Reservoir
36052	MOROCCO	OUJDA LANDFILL	0.85	5686	4833.1	Biomass	ICE	Gas-Engines	Dry cooling	Air	Biogas - Landfill	NA	1565.92	1096.15	-1.94121	34.5798	Methane from landfill to electricity. Air cooling
36053	MOROCCO	OUM ER-RBIA-1	0.22	939.4	206.668	Hydropower	Dammed	NA	NA	NA	NA	NA	1.40239e+06	1.40239e+06	-5.88859	32.6926	Reservoir
36054	MOROCCO	RABAT MILL	13	5686	73918	Biomass	Rankine	Steam Turbine	No cooling	NA	Sugarbeet	NA	11991.9	8394.3	-6.83333	34.0333	No cooling. By the size and type of crops, I assume is sugarbeet with no cooling
36055	MOROCCO	SAFI	1386	6571	9107406	Coal	Rankine	Steam Turbine	Once through	Saline	Pulverized Coal - Ultra-supercritical	NA	1.47751e+06	1.03426e+06	-9.28184	32.1485	Operational in 2019. Coast. Interesting, it removes the sand of the water before the condenser. https://www.gem.wiki/Safi_power_station
36056	MOROCCO	SAMIR REFINERY	66	1626	107316	Oil	Brayton	Gas Turbine	No cooling	NA	HFO	NA	172650	138120	-7.43488	33.6857	Group of gas turbines. Likely working with HFO
36057	MOROCCO	SIDI SAID MACHOU	20.8	939.4	19539.5	Hydropower	Dammed	NA	NA	NA	NA	NA	1.20218e+06	1.20218e+06	-8.47	33.22	Reservoir. https://fr.wikipedia.org/wiki/Barrage_Sidi_Sa%C3%AFd_Ma%C3%A2chou
36058	MOROCCO	TADLA FACTORY	3.323	5686	18894.6	Biomass	Rankine	Steam Turbine	No cooling	NA	Sugarbeet	NA	3065.3	2145.71	-6.80639	32.2094	No cooling. sugar factory, probably using biomass.
36059	MOROCCO	TAHADDART	400	6005	2402000	NG	Rankine	Steam Turbine	Wet tower	Freshwater	Natural Gas	Csa - Temperate Dry Summer	1.09565e+07	6.59211e+06	-5.98684	35.589	Coast. https://www.gem.wiki/Tahaddart_power_plant Only one unit observed in the satellite imaging. The second may not be constructed yet
36060	MOROCCO	TALAMBOT	14.1	939.4	13245.5	Hydropower	Dammed	NA	NA	NA	NA	NA	5.44951e+06	5.44951e+06	-5.184	35.252	Reservoir
36061	MOROCCO	TAN TAN	116	1626	188616	Oil	ICE	Diesel-Engines	Dry cooling	Air	Diesel	NA	61111.5	42778.1	-11.339	28.4689	Coast. https://www.gem.wiki/Tan_Tan_power_plant
36062	MOROCCO	TAOURIRT SOLAR	0.06	2306	138.36	Sun	PV	Rooftop	No cooling	NA	Flat	Csa - Temperate Dry Summer	0.52375	0.366625	-3.40206	34.8646	City. I cannot see it, I assume it is rooftop due to its size
36063	MOROCCO	TARFAYA	301.3	3361	1.01267e+06	Wind	Wind turbine	Onshore	No cooling	NA	NA	NA	0.134168	0.134168	-5.43829	35.6193	https://www.gem.wiki/Tarfaya_wind_farm
36064	MOROCCO	TETOUAN	384	6005	2305920	NG	ICE	Gas-Engines	Dry cooling	Air	Natural Gas	NA	747117	522982	-5.46356	35.57	Four MCI generators
36065	MOROCCO	TETOUAN CEMENT (Lafarge)	32	3361	107552	Wind	Wind turbine	Onshore	No cooling	NA	NA	NA	0.0142495	0.0142495	-5.4385	35.6063	Three phases, six turbines. Operational in 2009. https://www.gem.wiki/Lafarge_wind_farm
36066	MOROCCO	TIT MELLIL	198	1626	321948	Oil	Brayton	Gas Turbine	No cooling	NA	HFO	NA	517950	414360	-7.50302	33.5414	Group of gas turbines. /efaidnbmnnnibpcajpcglclefindmkaj/https://www.wartsila.com/docs/default-source/local-files/Morocco/the-need-for-flexible-energy-in-morocco.pdf
37001	MOZAMBIQUE	AKUTSIMA VILLAGE	0.017	1572	26.724	Sun	PV	Rooftop	No cooling	NA	Flat	BSh - Arid Steppe - Hot	0.374297	0.262008	14.8	-18.1167	I cannot find it, but because its size, it must be rooftop
37002	MOZAMBIQUE	ANGOCHE	0.51	281	143.31	Oil	ICE	Diesel-Engines	Dry cooling	Air	Diesel	NA	46.4324	32.5027	39.9086	-16.2325	By the size and fuel, it must be a small MCI generator
37003	MOZAMBIQUE	BEIRA	12	5155	61860	NG	Brayton	Gas Turbine	No cooling	NA	Natural Gas	NA	99520.4	79616.3	34.8521	-19.8078	One single gas turbine in the site.
37004	MOZAMBIQUE	CAHORA BASSA	2075	7140	14815500	Hydropower	Dammed	NA	NA	NA	NA	NA	2.3191e+09	2.3191e+09	32.7047	-15.5856	Reservoir
37005	MOZAMBIQUE	CHICAMBA	44	6231.3	274177	Hydropower	Dammed	NA	NA	NA	NA	NA	1.33808e+08	1.33808e+08	33.1333	-19.1611	Reservoir. https://en.wikipedia.org/wiki/Chicamba_Hydroelectric_Power_Station
37006	MOZAMBIQUE	CORUMANA	16.6	2337.3	38799.2	Hydropower	Dammed	NA	NA	NA	NA	NA	2.80117e+07	2.80117e+07	32.1339	-25.2203	ROR. https://www.power-technology.com/marketdata/power-plant-profile-corumana-mozambique/?cf-view
37007	MOZAMBIQUE	CUAMBA	1.09	7140	7782.6	Hydropower	ROR	NA	NA	NA	NA	NA	0	0	36.5372	-14.8031	ROR (very small)
37008	MOZAMBIQUE	CUAMBA	0.42	281	118.02	Oil	ICE	Diesel-Engines	Dry cooling	Air	Diesel	NA	38.2384	26.7669	36.5372	-14.8031	By the size and fuel, it must be a small MCI generator
37009	MOZAMBIQUE	GIGAWATT PARK	120	5155	618600	NG	ICE	Gas-Engines	Dry cooling	Air	Natural Gas	NA	200426	140298	32.0054	-25.4619	Diesel engines running with Natural Gas. https://www.gigawatt.co.mz/en/home/
37010	MOZAMBIQUE	HONDE MINI	0.08	7140	571.2	Hydropower	ROR	NA	NA	NA	NA	NA	0	0	33.7044	-16.6828	ROR (very small)
37011	MOZAMBIQUE	INHAMBANE	2.4	281	674.4	Oil	ICE	Diesel-Engines	Dry cooling	Air	Diesel	NA	218.505	152.954	35.3833	-23.865	By its size and fuel I assume it is an ICE with diesel
37012	MOZAMBIQUE	KUVANINGA	40.35	5155	208004	NG	ICE	Gas-Engines	Dry cooling	Air	Natural Gas	NA	67393.3	47175.3	32.8071	-24.4354	Racks of fans for reciprocating engines. https://www.powerup.at/2022/07/04/kuvaninga-energia-power-plant-reached-more-than-99-uptime/ https://clubofmozambique.com/news/mozambique-long-term-operations-maintenance-contract-awarded-for-kuvaninga-power-plant-176828/
37013	MOZAMBIQUE	LICHINGA	0.75	7140	5355	Hydropower	ROR	NA	NA	NA	NA	NA	0	0	35.2406	-13.3128	ROR (very small)
37014	MOZAMBIQUE	LICHINGA	2.54	281	713.74	Oil	ICE	Diesel-Engines	Dry cooling	Air	Diesel	NA	231.252	161.876	35.233	-13.3339	I cannot find it, but likely a group of diesel engines next to the electric substation
37015	MOZAMBIQUE	MAFAMBISSE MILL	6	5686	34116	Biomass	Rankine	Steam Turbine	No cooling	NA	Sugarcane	NA	5534.7	3874.29	34.6244	-19.5492	No cooling. Sugar plantation. River nearby
37016	MOZAMBIQUE	MAPUTO	121	5155	623755	NG	Combined	Combined Cycle (CC)	Dry cooling	Air	Natural Gas	NA	23611.7	16528.2	32.5892	-25.9653	First it was a single gas turbine, since 2018 it has been upgraded to a combined cycled power plant https://www.gem.wiki/Maputo_power_station
37017	MOZAMBIQUE	MARROMEU MILL	4	5686	22744	Biomass	Rankine	Steam Turbine	No cooling	NA	Sugarcane	NA	3689.8	2582.86	35.9453	-18.2908	No cooling. Sugar plantation. River nearby
37018	MOZAMBIQUE	MASSINGIR	40	7140	285600	Hydropower	Dammed	NA	NA	NA	NA	NA	1.02502e+08	1.02502e+08	32.1512	-23.8964	Reservoir. https://www.power-technology.com/uncategorized/power-plant-profile-massingir-mozambique/
37019	MOZAMBIQUE	MAVUZI	52	7140	371280	Hydropower	Dammed	NA	NA	NA	NA	NA	839962	839962	33.4928	-19.5261	https://www.power-technology.com/marketdata/power-plant-profile-mavuzi-mozambique/
37020	MOZAMBIQUE	MOCUBA	0.42	281	118.02	Oil	ICE	Diesel-Engines	Dry cooling	Air	Diesel	NA	38.2384	26.7669	36.9856	-16.8375	By the size and fuel, it must be a small MCI generator
37021	MOZAMBIQUE	MOMA TITANIUM	9.6	281	2697.6	Oil	ICE	Diesel-Engines	Dry cooling	Air	Diesel	NA	874.022	611.815	39.6343	-16.5564	Titanium mine. Diesel generator. https://www.mining-technology.com/projects/moma-titanium-minerals-mine-mozambique/
37022	MOZAMBIQUE	NACALA	4.2	281	1180.2	Oil	ICE	Diesel-Engines	Dry cooling	Air	Diesel	NA	382.384	267.669	40.6729	-14.5596	Diesel engines inside a building next to the substation
37023	MOZAMBIQUE	NAMPULA	6.536	281	1836.62	Oil	ICE	Diesel-Engines	Dry cooling	Air	Diesel	NA	595.063	416.544	39.2175	-15.1245	I cannot find it, but likely a group of diesel engines next to the electric substation
37024	MOZAMBIQUE	PEMBA	8.5	281	2388.5	Oil	ICE	Diesel-Engines	Dry cooling	Air	Diesel	NA	773.873	541.711	40.5177	-12.9739	Hotel, probably diesel generator. Coast. Cant find it. Assume it is MCI due to its characteristics
37025	MOZAMBIQUE	PEQUENOS LIBOMBOS	1.75	7140	12495	Hydropower	Dammed	NA	NA	NA	NA	NA	1.64034e+07	1.64034e+07	32.2408	-25.8639	Reservoir, mainly for water storage. 60mozambique.com/business/infrastructures/mozambique-pequenos-libombos-reservoir-filling-up/
37026	MOZAMBIQUE	QUELIMANE	6.88	281	1933.28	Oil	ICE	Diesel-Engines	Dry cooling	Air	Diesel	NA	626.382	438.468	36.8883	-17.8786	Hotel, probably diesel generator. Cant find it. Assume it is MCI due to its characteristics
37027	MOZAMBIQUE	RESSANO GARCIA	120	7300	876000	NG	ICE	Gas-Engines	Dry cooling	Air	Natural Gas	NA	283824	198677	32.0061	-25.4666	Coast. https://www.gem.wiki/Gigawatt_Park_power_station
37028	MOZAMBIQUE	RIOPELE MAPUTO	10.8	281	3034.8	Oil	ICE	Diesel-Engines	Dry cooling	Air	Diesel	NA	983.274	688.292	32.5758	-25.9403	Diesel engines for the textile factory. It is not called Riopele anymore
37029	MOZAMBIQUE	TETE	0.82	281	230.42	Oil	ICE	Diesel-Engines	Dry cooling	Air	Diesel	NA	74.656	52.2592	33.5867	-16.1564	By the size and fuel, it must be a small MCI generator
37030	MOZAMBIQUE	VALE MOATIZE	10	281	2810	Oil	ICE	Diesel-Engines	Dry cooling	Air	Diesel	NA	910.439	637.307	33.7863	-16.1676	Diesel engines for the Coal mine. River nearby
37031	MOZAMBIQUE	XINAVANE MILL	4	5686	22744	Biomass	Rankine	Steam Turbine	Wet Tower	Freshwater	Sugarcane	Aw - Tropical Savannah	103314	94704.9	32.8041	-25.0433	Cooling tower. Sugar plantation. River nearby
38001	NAMIBIA	EJUVA I and II	10	1545	15450	Sun	PV	Land	No cooling	NA	Flat	BSh - Arid Steppe - Hot	1520.6	1064.42	18.9718	-22.438	Sem-Arid. Operational in 2016. https://en.wikipedia.org/wiki/List_of_power_stations_in_Namibia
38002	NAMIBIA	ERONGO SOLAR	27	1545	41715	Sun	PV	Land	No cooling	NA	Flat	BWh - Desert Hot	4105.62	2873.93	14.9644	-22.4302	Desert. Near Arangis
38003	NAMIBIA	GAM SOLAR	0.292	1545	451.14	Sun	PV	Land	No cooling	NA	Flat	BSh - Arid Steppe - Hot	44.4015	31.0811	20.811	-20.2392	Semi-arid
38004	NAMIBIA	HARDAP SOLAR	45.5	1545	70297.5	Sun	PV	Land	No cooling	NA	Flat	BWh - Desert Hot	6918.73	4843.11	18.0323	-24.6633	Desert. Operational in 2018. https://www.power-technology.com/data-insights/power-plant-profile-alten-renewable-hardap-mariental-solar-pv-park-namibia/
38005	NAMIBIA	KARIBIB SOLAR POWER PLANT	5	1545	7725	Sun	PV	Land	No cooling	NA	Flat	BWh - Desert Hot	760.3	532.21	15.8391	-21.9482	Desert. Operational in 2017. https://en.wikipedia.org/wiki/Karibib_Solar_Power_Plant
38006	NAMIBIA	MAERUA LIFESTYLE SHOPPING	0.5	1545	772.5	Sun	PV	Rooftop	No cooling	NA	Flat	BSh - Arid Steppe - Hot	10.8197	7.57376	17.093	-22.5834	City.
38007	NAMIBIA	MARIENTAL SOLAR	45.5	1545	70297.5	Sun	PV	Land	No cooling	NA	Flat	BWh - Desert Hot	6918.73	4843.11	18.0272	-24.6527	Operational in 2019. https://en.wikipedia.org/wiki/Mariental_Solar_Power_Station
38008	NAMIBIA	NAMIBIA BREWERIES	2.27	1545	3507.15	Sun	PV	Rooftop	No cooling	NA	Flat	BSh - Arid Steppe - Hot	49.1212	34.3849	17.0787	-22.5243	City. https://nambusinessexpress.com/?p=2531
38009	NAMIBIA	OMARURU BEVERAGES	0.051	1545	78.795	Sun	PV	Rooftop	No cooling	NA	Flat	BWh - Desert Hot	1.1036	0.772523	15.7439	-21.4551	Semi-arid. https://en.wikipedia.org/wiki/Omburu_Solar_Power_Station
38010	NAMIBIA	OMBEPO	5	2183	10915	Wind	Wind turbine	Onshore	No cooling	NA	NA	NA	0.00144612	0.00144612	15.1113	-26.3812	https://www.thewindpower.net/windfarm_en_17339_ombepo.php
38011	NAMIBIA	OTJIWARONGO	5.7	1545	8806.5	Sun	PV	Land	No cooling	NA	Flat	BSh - Arid Steppe - Hot	866.742	606.719	16.6255	-20.4465	Semi-arid. https://hopsol.com/portfolio-item/otjiwarongo-solar-park/
38012	NAMIBIA	OTJOZONDJUPA SOLAR	5	1545	7725	Sun	PV	Land	No cooling	NA	Flat	BSh - Arid Steppe - Hot	760.3	532.21	18.1167	-19.5565	Desert. https://www.sma.de/en/references/otjozondjupa-namibia
38013	NAMIBIA	OUTJO	0.25	667	166.75	Biomass	Rankine	Steam Turbine	Wet Tower	Freshwater	Wood	BSh - Arid Steppe - Hot	757.461	694.339	16.1252	-20.1062	Cooling tower. I cannot find it, but assumed because of the biomass
38014	NAMIBIA	PARATUS (WALVIS)	16	151	2416	Oil	ICE	Diesel-Engines	Dry cooling	Air	HFO	NA	782.783	547.948	14.5053	-22.9575	Coast. Only standby. https://en.wikipedia.org/wiki/List_of_power_stations_in_Namibia https://www.nampower.com.na/Page.aspx?p=186
38015	NAMIBIA	PARATUS ANIXAS	22.5	151	3397.5	Oil	ICE	Diesel-Engines	Dry cooling	Air	Diesel	NA	1100.79	770.552	14.5166	-22.9396	Diesel engines near the refinery
38016	NAMIBIA	ROSH PINAH POWER PLANT	5	1545	7725	Sun	PV	Land	No cooling	NA	Flat	BWk - Arid Desert - Hot	760.3	532.21	16.7317	-27.9824	Desert. Operational in 2017. https://en.wikipedia.org/wiki/List_of_power_stations_in_Namibia
38017	NAMIBIA	SPAR OTJIWARONGO	0.25	1545	386.25	Sun	PV	Rooftop	No cooling	NA	Flat	BSh - Arid Steppe - Hot	5.40983	3.78688	16.6514	-20.4625	City.
38018	NAMIBIA	THE SALT COMPANY	0.189	1545	292.005	Sun	PV	Land	No cooling	NA	Flat	BWh - Desert Hot	28.7393	20.1175	14.5243	-22.5979	Semi-arid. Next to a salt factory near the sea
38019	NAMIBIA	TREKKOPJE SOLAR	27	1545	41715	Sun	PV	land	No cooling	NA	Flat	BWh - Desert Hot	4105.62	2873.93	14.8066	-22.156	Operational in 2018. https://www.power-technology.com/data-insights/power-plant-profile-trekkopje-solar-pv-park-namibia/
38020	NAMIBIA	TSUMKWE HYBRID	1.06	151	160.06	Oil	ICE	Diesel-Engines	Dry cooling	Air	Diesel	NA	51.8594	36.3016	20.5	-19.6	Next to a solar park. It must be a Diesel generator as backup considering that is called a Hybrid plant.
38021	NAMIBIA	TSUMKWE HYBRID	0.201	1545	310.545	Sun	PV	Land	No cooling	NA	Flat	BSh - Arid Steppe - Hot	30.5641	21.3948	20.5	-19.6	Semi-arid.
38022	NAMIBIA	USIB CPV DEMO	0.026	1545	40.17	Sun	PV	Land	No cooling	NA	Concentrated	BWh - Desert Hot	11.8607	8.30248	17.0894	-23.3196	Demonstration CPV plant. //efaidnbmnnnibpcajpcglclefindmkaj/https://www.nampower.com.na/public/docs/communications/Media%20Release/Usib%20Concentrator%20Photovoltaic%20Demonstration%20Plant.pdf
38023	NAMIBIA	VAN ECK	120	442	53040	Coal	Rankine	Steam Turbine	Dry cooling	Air	Pulverized Coal - Subcritical	NA	8604.78	6023.35	17.0787	-22.5116	Four units of 30 MW each. https://www.gem.wiki/Van_Eck_power_station
38024	NAMIBIA	WALDSCHMIDT EGGS	0.07	1545	108.15	Sun	PV	Rooftop	No cooling	NA	Flat	BSh - Arid Steppe - Hot	1.51475	1.06033	17.0854	-22.3879	Semi-arid. Rooftops of an egg factory
38025	NAMIBIA	WOERMANN OMBILI	0.067	1545	103.515	Sun	PV	Rooftop	No cooling	NA	Flat	BSh - Arid Steppe - Hot	1.44983	1.01488	17.0439	-22.5071	City.
38026	NAMIBIA	WOERMANN WINDHOEK	1.5	1545	2317.5	Sun	PV	Rooftop	No cooling	NA	Flat	BSh - Arid Steppe - Hot	32.459	22.7213	17.0637	-22.5864	City. https://d2pg1rl5sq3t70.cloudfront.net/woermann-group-invests-n30m-in-solar-power/
39001	NIGER	ABA FACTORY	0.8	2211.51	1769.21	NG	ICE	Gas-Engines	Dry cooling	Air	Natural Gas	NA	573.223	401.256	7.36667	5.10658	By the size and fuel, it must be a small MCI generator
39002	NIGER	ANOU ARAREN MINE (Tefereye mine)	37.3	5898	219995	Coal	Rankine	Steam Turbine	Wet tower	Freshwater	Pulverized Coal - Subcritical	BWh - Desert Hot	999328	916050	7.83904	17.2898	two sets of Cooling towers. http://wikimapia.org/15166927/Anou-Araren-Coal-Mine There is no information regarding the type of fuel. By its size and location we assume pulverized coal - subcritical
39003	NIGER	ANOU ARAREN MINE (Teferya mine)	4.4	3315	14586	Oil	ICE	Diesel-Engines	Dry cooling	Air	Diesel	NA	4725.86	3308.1	7.83904	17.2898	Diesel generator for the Coal mine
39004	NIGER	ARLIT MINE	14.52	3315	48133.8	Oil	ICE	Diesel-Engines	Dry cooling	Air	Diesel	NA	15595.3	10916.7	7.35721	18.7861	Group of diesel generators for the Uranium mine
39005	NIGER	D'AKOUTA MINE (Orano)	12	3315	39780	Oil	ICE	Diesel-Engines	Dry cooling	Air	Diesel	NA	12888.7	9022.1	7.30269	18.68	Group of diesel generators for the Uranium Mine. The mine has been closed since March of 2021. https://www.ans.org/news/article-2780/nigers-akouta-uranium-mine-ceases-operations/
39006	NIGER	GOROU BANDA	100	3315	331500	Oil	ICE	Diesel-Engines	Dry cooling	Air	Diesel	NA	107406	75184.1	1.78333	14.05	Racks of fans for diesel engines. https://en.wikipedia.org/wiki/List_of_power_stations_in_Niger
39007	NIGER	GOUDEL (Niamey II)	90	3315	298350	Oil	ICE	Diesel-Engines	Dry cooling	Air	Crude Oil	NA	96665.3	67665.7	2.07011	13.5451	Racks of fans for diesel engines. The new group of diesel engines was operating since the last months of 2020: https://winenerji.com/
39008	NIGER	GOUDEL PUMPING	1.2	3315	3978	Oil	ICE	Diesel-Engines	Dry cooling	Air	Diesel	NA	1288.87	902.21	2.1098	13.5137	Water treatment plant. Assumed Diesel generator due to its size and fuel.
39009	NIGER	MALBAZA CEMENT PLANT	2.3	3315	7624.5	Oil	ICE	Diesel-Engines	Dry cooling	Air	Diesel	NA	2470.34	1729.24	5.52032	13.9271	Diesel generator for the cement plant
39010	NIGER	NIGELEC CENTRAL SOLAIRE MALBAZA	7	1545	10815	Sun	PV	Land	No cooling	NA	Flat	BSh - Arid Steppe - Hot	1064.42	745.094	5.51983	13.9685	Desert. Operational in 2018. https://www.afrik21.africa/en/niger-nigelec-commissions-malbaza-photovoltaic-solar-park/
39011	NIGER	SAMIRA HILL MINE	6	3315	19890	Oil	ICE	Diesel-Engines	Dry cooling	Air	Diesel	NA	6444.35	4511.05	1.22579	13.4128	Group of diesel generators for the Gold mine
39012	NIGER	TAHOUA	3	3315	9945	Oil	ICE	Diesel-Engines	Dry cooling	Air	Diesel	NA	3222.18	2255.52	5.2692	14.8888	By its size and purpose I assume it is an diesel generator
39013	NIGER	YANTALA PUMPING	1	3315	3315	Oil	ICE	Diesel-Engines	Dry cooling	Air	Diesel	NA	1074.06	751.841	2.1098	13.5137	Water plant. Assumed Diesel generator due to its size and fuel.
39014	NIGER	ZINDER	23	3315	76245	Oil	ICE	Diesel-Engines	Dry cooling	Air	Crude Oil	NA	24703.4	17292.4	8.95123	13.8	Racks of fans for diesel engines. The new group of diesel engines was not there until the last trimester of 2022: https://winenerji.com/
40001	NIGERIA	ABA PLANT	0.8	2433	1946.4	Oil	ICE	Diesel-Engines	Dry cooling	Air	Diesel	NA	630.633	441.443	7.36667	5.10658	By the size and fuel, it must be a small MCI generator
40002	NIGERIA	ABA POWER	141	2212	311892	NG	Brayton	Gas Turbine	No cooling	NA	Natural Gas	NA	501772	401417	7.31065	5.15325	Also called GPAL. https://geometricpower.com/projects/aba-phase-i/
40003	NIGERIA	ABAKALIKI	10	2212	22120	NG	ICE	Gas-Engines	Dry cooling	Air	Natural Gas	NA	7166.87	5016.81	8.08525	6.3443	Group of gas engines next to the substation
40004	NIGERIA	ABEOKUTA	1.8	2433	4379.4	Oil	ICE	Diesel-Engines	Dry cooling	Air	Diesel	NA	1418.92	993.247	3.35	7.15	By its size and fuel I assume it is an ICE with diesel
40005	NIGERIA	AFAM (FIPL) POWER STATION	180	2212	398160	NG	Brayton	Gas Turbine	No cooling	NA	Natural Gas	NA	640560	512448	7.22653	4.83499	Operational in 2011. Gas turbines. https://www.gem.wiki/Afam_(FIPL)_power_station
40006	NIGERIA	AFAM IV	450	2212	995400	NG	Brayton	Gas Turbine	No cooling	NA	Natural Gas	NA	1.6014e+06	1.28112e+06	7.2535	4.85176	Part of the AFAM complex. Gas turbines. https://www.gem.wiki/Afam_IV_power_station
40007	NIGERIA	AFAM V	276	2212	610512	NG	Brayton	Gas Turbine	No cooling	NA	Natural Gas	NA	982192	785753	7.2535	4.85176	Part of the AFAM complex. Operational in 2002. https://www.gem.wiki/Afam_V_power_station
40008	NIGERIA	AFAM-VI	450	2212	995400	NG	Brayton	Gas Turbine	No cooling	NA	Natural Gas	NA	1.6014e+06	1.28112e+06	7.25717	4.84988	Part of the AFAM complex. 55 and 56 are the same combined power plant IGCC. 55 is working under a brayton cycle, while 56 is using its combustion gases. https://www.power-technology.com/data-insights/power-plant-profile-afam-vi-combined-cycle-power-plant-nigeria/ Production 7097 MWh/MW https://fipl-ng.com/plants/ https://www.gem.wiki/Afam_VI_power_station
40009	NIGERIA	AFAM-VI	200	2433	486600	waste heat	Rankine	Steam Turbine	Dry cooling	Air	Heat recovery	NA	18419.8	12893.9	7.25717	4.84988	55 and 56 are the same combined power plant IGCC. 55 is working under a brayton cycle, while 56 is using its combustion gases. https://www.gem.wiki/Afam_VI_power_station
40010	NIGERIA	AFCOTT FACTORY	3	2433	7299	Oil	ICE	Diesel-Engines	Dry cooling	Air	Diesel	NA	2364.87	1655.41	12.4582	9.21632	Diesel generator in the factory
40011	NIGERIA	AGBARHA-OTOR BREWERY	0.8	2433	1946.4	Oil	ICE	Diesel-Engines	Dry cooling	Air	Diesel	NA	630.633	441.443	6.00743	5.48986	By the size and fuel, it must be a small MCI generator
40012	NIGERIA	AJAOKUTA	110	2433	267630	Oil	Rankine	Steam Turbine	Wet Tower	Freshwater	HFO	Aw - Tropical Savannah	1.21571e+06	1.1144e+06	6.68748	7.49752	Steel plant. https://www.ajaokutasteel.com.ng/company-overview
40013	NIGERIA	AKUTE LWC	12.152	2212	26880.2	NG	ICE	Gas-Engines	Dry cooling	Air	Natural Gas	NA	8709.19	6096.43	3.37484	6.68362	Racks of fans in the building next to river. Water company
40014	NIGERIA	ALAOJI	1068	2212	2362416	NG	Brayton	Gas Turbine	No cooling	NA	Natural Gas	NA	3.80065e+06	3.04052e+06	7.32181	5.06677	Four gas turbine units. No cooling. https://www.gem.wiki/Alaoji_power_station
40015	NIGERIA	ALAUSA	7.2	2212	15926.4	NG	ICE	Gas-Engines	Dry cooling	Air	Natural Gas	NA	5160.15	3612.1	3.36258	6.61724	Diesel engines and gas engines. https://www.elektronenergy.com/alausa-power-limited/
40016	NIGERIA	ALAUSA	4	2433	9732	Oil	ICE	Diesel-Engines	Dry cooling	Air	Diesel	NA	3153.17	2207.22	3.34957	6.62257	Cooling towers, river nearby. https://www.elektronenergy.com/alausa-power-limited/
40017	NIGERIA	ALODE-ELEME	20	2212	44240	NG	Brayton	Gas Turbine	No cooling	NA	Natural Gas	NA	71173.3	56938.6	7.11627	4.76268	Next to the oil and gas plant
40018	NIGERIA	ALSCON SMELTER	178.8	2212	395506	NG	Brayton	Gas Turbine	No cooling	NA	Natural Gas	NA	636289	509032	7.57349	4.56873	Gas turbines. https://www.gem.wiki/ALSCON_Smelter_power_plant
40019	NIGERIA	ANAMBRA-IMO PUMPING	0.36	2433	875.88	Oil	ICE	Diesel-Engines	Dry cooling	Air	Diesel	NA	283.785	198.649	12.3086	9.28075	By the size and fuel, it must be a small MCI generator
40020	NIGERIA	ANKWIL	3.13	3861.3	12085.9	Hydropower	ROR	NA	NA	NA	NA	NA	9070.69	9070.69	8.96725	9.75698	ROR
40021	NIGERIA	APAPA BOTTLING	1.2	2433	2919.6	Oil	ICE	Diesel-Engines	Dry cooling	Air	Diesel	NA	945.95	662.165	3.36408	6.44464	Diesel generation in the bottling company
40022	NIGERIA	APAPA BOTTLING COGEN	1.16	2212	2565.92	NG	ICE	Gas-Engines	Dry cooling	Air	Natural Gas	NA	831.357	581.95	3.36408	6.44464	By the size and fuel, it must be a small MCI generator
40023	NIGERIA	APAPA MILL	27.4	2212	60608.8	NG	ICE	Gas-Engines	Dry cooling	Air	Natural Gas	NA	19637.2	13746.1	3.37061	6.44971	Coast. https://www.clarke-energy.com/2006/flour-mills-of-nigeria-captive-power-plant/
40024	NIGERIA	APAPA MILL	7.5	2433	18247.5	Oil	ICE	Diesel-Engines	Dry cooling	Air	Diesel	NA	5912.19	4138.53	3.37056	6.44973	Coast. https://shipsandports.com.ng/flour-mills-installs-14-mw-capacity-gas-turbine/
40025	NIGERIA	ARM OGUN	1.6	2212	3539.2	NG	ICE	Gas-Engines	Dry cooling	Air	Natural Gas	NA	1146.7	802.69	3.57454	6.91174	Diesel generator for the installations
40026	NIGERIA	ASABA GENERAL PIPE	0.675	2433	1642.28	Oil	ICE	Diesel-Engines	Dry cooling	Air	Diesel	NA	532.097	372.468	6.73384	6.20064	By the size and fuel, it must be a small MCI generator
40027	NIGERIA	ASABA POLICE COMMAND	4.5	2433	10948.5	Oil	ICE	Diesel-Engines	Dry cooling	Air	Diesel	NA	3547.31	2483.12	6.69589	6.20593	By its size and purpose I assume it is an diesel generator used as backup for the police command
40028	NIGERIA	ASHAKA CEMENT PLANT	16	2433	38928	Oil	ICE	Diesel-Engines	Dry cooling	Air	Diesel	NA	12612.7	8828.86	11.477	10.9332	Diesel engines for the cement plant
40029	NIGERIA	AZURA-EDO	459	2212	1015308	NG	Brayton	Gas Turbine	No cooling	NA	Natural Gas	NA	1.63343e+06	1.30674e+06	5.68048	6.41045	Three units of Brayton gas turbines. Operational in 2018. www.power-technology.com/data-insights/power-plant-profile-azura-edo-ipp-power-plant-nigeria/ https://www.gem.wiki/Azura-Edo_IPP_power_station
40030	NIGERIA	BAUCHI	1.8	2433	4379.4	Oil	ICE	Diesel-Engines	Dry cooling	Air	Diesel	NA	1418.92	993.247	9.84327	10.3134	Diesel generator for the factory
40031	NIGERIA	BENIN BOTTLING	5.375	2433	13077.4	Oil	ICE	Diesel-Engines	Dry cooling	Air	Diesel	NA	4237.07	2965.95	5.59817	6.44509	Pepsico bottling company. Diesel generators
40032	NIGERIA	BENIN BOTTLING COGEN	3.48	2212	7697.76	NG	ICE	Gas-Engines	Dry cooling	Air	Natural Gas	NA	2494.07	1745.85	5.7117	6.3784	Coca cola company. River nearby
40033	NIGERIA	BENIN BOTTLING COGEN	1.125	2433	2737.12	Oil	ICE	Diesel-Engines	Dry cooling	Air	Diesel	NA	886.828	620.779	5.60375	6.33499	By the size and fuel, it must be a small MCI generator
40034	NIGERIA	BENIN CITY BREWERY	9.9	2212	21898.8	NG	ICE	Gas-Engines	Dry cooling	Air	Natural Gas	NA	7095.21	4966.64	5.66351	6.34504	Gas engines for the brewery https://www.clarke-energy.com/2012/guinness-ogba-combined-heat-power-plant/
40035	NIGERIA	BENUE CEMENT	38	2433	92454	Oil	ICE	Diesel-Engines	Dry cooling	Air	Diesel	NA	29955.1	20968.6	8.974	7.411	Racks of cooling fans, river nearby. https://www.gem.wiki/Gboko_Cement_power_station
40036	NIGERIA	BETA GLASS	4.9	2212	10838.8	NG	ICE	Gas-Engines	Dry cooling	Air	Natural Gas	NA	3511.77	2458.24	5.92154	5.54261	Gas engines for the glass company.
40037	NIGERIA	BONNY ISLAND MOBIL	180	2212	398160	NG	Brayton	Gas Turbine	No cooling	NA	Natural Gas	NA	640560	512448	7.16157	4.41836	In the same complex as LNG plant. https://www.gem.wiki/Bonny_Island_LNG_power_plant
40038	NIGERIA	BONNY ISLAND TERMINAL	180	2212	398160	NG	Brayton	Gas Turbine	No cooling	NA	Natural Gas	NA	640560	512448	7.16667	4.43333	In the same complex as LNG plant. https://www.gem.wiki/Bonny_Island_LNG_power_plant
40039	NIGERIA	BONNY LNG PLANT	405.4	2212	896745	NG	Brayton	Gas Turbine	No cooling	NA	Natural Gas	NA	1.44268e+06	1.15415e+06	7.16085	4.41881	Gas turbines. https://www.gem.wiki/Bonny_Island_LNG_power_plant
40040	NIGERIA	BRESSON OGUN	90	2212	199080	NG	Brayton	Gas Turbine	No cooling	NA	Natural Gas	NA	320280	256224	3.45621	6.81607	The 500 MW project of the same name has not been completed or has been operating https://www.gem.wiki/Bresson_power_station https://punchng.com/ge-bressons-500mw-power-project-ready-next-year/ It indicates that it is still in plans
40041	NIGERIA	BUKURU	7.8	2433	18977.4	Oil	ICE	Diesel-Engines	Dry cooling	Air	Diesel	NA	6148.67	4304.07	8.85711	9.75914	By its size and purpose I assume it is an diesel generator
40042	NIGERIA	CALABAR EPZ	3.14	2433	7639.62	Oil	ICE	Diesel-Engines	Dry cooling	Air	Diesel	NA	2475.23	1732.66	8.322	4.9517	By its size and purpose I assume it is an diesel generator
40043	NIGERIA	CALABAR MILLS	0.4	2433	973.2	Oil	ICE	Diesel-Engines	Dry cooling	Air	Diesel	NA	315.317	220.722	8.31667	4.95	By the size and fuel, it must be a small MCI generator
40044	NIGERIA	CEDDI PLAZA	2.2	2433	5352.6	Oil	ICE	Diesel-Engines	Dry cooling	Air	Diesel	NA	1734.24	1213.97	7.48976	9.05735	Shopping mall. Diesel generator as backup
40045	NIGERIA	CHALLAWA PLANT	1	2433	2433	Oil	ICE	Diesel-Engines	Dry cooling	Air	Diesel	NA	788.291	551.804	8.42173	11.9069	Coca cola bottling. Assumed Diesel generator due to its size and fuel.
40046	NIGERIA	CHANRAI SUNSEED	5	2433	12165	Oil	ICE	Diesel-Engines	Dry cooling	Air	Diesel	NA	3941.46	2759.02	7.72857	11.0829	Charai group, sunseed nigeria limited
40047	NIGERIA	CORONATION POWER	20	2212	44240	NG	ICE	Gas-Engines	Dry cooling	Air	Natural Gas	NA	14333.7	10033.6	3.2218	6.7254	Ice power https://rocketreach.co/coronation-power-and-gas-profile_b7d9e858c07fe467
40048	NIGERIA	CUMMINS SAPELE	26	2212	57512	NG	Brayton	Gas Turbine	No cooling	NA	Natural Gas	NA	92525.3	74020.2	5.64411	5.92729	In the Sapele Complex. Gas turbines. Operational in 2018. https://punchng.com/cummins-installs-26mw-power-plant-in-delta/
40049	NIGERIA	DADIN-KOWA	40	3861.3	154452	Hydropower	Dammed	NA	NA	NA	NA	NA	2.64673e+08	2.64673e+08	11.4807	10.3214	Operational in 2020. Reservoir. https://www.power-technology.com/data-insights/power-plant-profile-dadin-kowa-nigeria/
40050	NIGERIA	DANGOTE SUGAR	16	2212	35392	NG	ICE	Gas-Engines	Dry cooling	Air	Natural Gas, LFO	NA	11467	8026.9	3.38306	6.43917	Seems like gas engines. https://sugar.dangote.com/operations/
40051	NIGERIA	DAUSAYI PLANT	5	2433	12165	Oil	ICE	Diesel-Engines	Dry cooling	Air	Diesel	NA	3941.46	2759.02	8.71288	12.0269	Diesel generator. https://www.china-power-contractor.cn/African_Project%20lists_of_diesel_generator_power_plant.htm
40052	NIGERIA	DELTA-UGHELLI (Transcorp)	600	2212	1327200	NG	Brayton	Gas Turbine	No cooling	NA	Natural Gas	NA	2.1352e+06	1.70816e+06	5.91591	5.54131	Brayton, air intake. https://www.gem.wiki/Ughelli_power_station
40053	NIGERIA	DUFIL CHOBA	3.48	2212	7697.76	NG	ICE	Gas-Engines	Dry cooling	Air	Natural Gas	NA	2494.07	1745.85	6.90075	4.88469	River. https://cetpower.com/achievement/
40054	NIGERIA	EBONYI BIOMASS	5.5	2500	13750	Biomass	Rankine	Steam Turbine	Wet Tower	Freshwater	Rice	Aw - Tropical Savannah	62459.3	57254.4	7.95929	6.17797	Rice plant, use of rice husk. https://www.legit.ng/1399718-ebonyi-govt-converts-husks-rice-mills-75-megawatts-electricity.html
40055	NIGERIA	EBUTE BARGE	294	2212	650328	NG	Brayton	Gas Turbine	No cooling	NA	Natural Gas	NA	1.04625e+06	836998	3.37617	6.45638	Might be a barge in the Lagos lake. https://www.power-technology.com/marketdata/power-plant-profile-ebute-barge-mounted-power-station-nigeria/?cf-view
40056	NIGERIA	EBUTE BREWERY	2.925	2433	7116.52	Oil	ICE	Diesel-Engines	Dry cooling	Air	Diesel	NA	2305.75	1614.03	3.36482	6.48037	Group of diesel engines for the Brewery
40057	NIGERIA	EGBIN	1320	2212	2919840	NG	Rankine	Steam Turbine	Once through	Saline	Natural Gas	NA	110528	73579.9	0.61508	6.56371	Two sets of three steam turbine units. Once trough cooling from the Lagos Lagoon. Most likely brackish water due to its connection to the sea. https://www.gem.wiki/Egbin_power_station
40058	NIGERIA	ELEME PETROCHEM	264	2212	583968	NG	Rankine	Steam Turbine	Wet Tower	Freshwater	Natural Gas	Am - Tropical Monsoon	2.67478e+06	2.13319e+06	7.10211	4.83503	Cooling towers, river nearby
40059	NIGERIA	ENUGU	0.03	3861.3	115.839	Hydropower	ROR	NA	NA	NA	NA	NA	0	0	7.4943	6.4402	ROR (very small)
40060	NIGERIA	ENUGU WORKS	9.779	2433	23792.3	Oil	ICE	Diesel-Engines	Dry cooling	Air	Diesel	NA	7708.7	5396.09	7.4943	6.4402	I cannot find it. Likely a large group of diesel generators for a Factory in Enugu
40061	NIGERIA	EWEKORO WORKS-2	13.32	2212	29463.8	NG	Brayton	Gas Turbine	No cooling	NA	Natural Gas	NA	47401.4	37921.1	3.20611	6.9026	Brayton, air cooling
40062	NIGERIA	EWEKORO WORKS-3	100.02	2212	221244	NG	ICE	Gas-Engines	Dry cooling	Air	Natural Gas	NA	71683.1	50178.2	3.20411	6.89803	Brayton, air cooling. https://www.wartsila.com/media/news/28-09-2021-renewal-of-wartsila-long-term-operation-maintenance-agreement-provides-reliable-power-supply-to-leading-nigerian-cement-producer-3040295
40063	NIGERIA	FIRST ALUMINIUM LAGOS	0.192	2212	424.704	NG	ICE	Gas-Engines	Dry cooling	Air	Natural Gas	NA	137.604	96.3228	3.36352	6.55888	ICE in the factory. By its size and location is a diesel engine
40064	NIGERIA	FORCADOS OIL TERMINAL	37.5	2212	82950	NG	Brayton	Gas Turbine	No cooling	NA	Natural Gas	NA	133450	106760	5.35301	5.3391	Next to the Oil terminal. Coast
40065	NIGERIA	GBARAIN	252	2212	557424	NG	Brayton	Gas Turbine	No cooling	NA	Natural Gas	NA	896784	717427	6.30157	5.03107	Two units of gas turbines, near river. https://www.gem.wiki/Gbarain_Gas_Plant_power_station
40066	NIGERIA	GEREGU-I	435	2212	962220	NG	Brayton	Gas Turbine	No cooling	NA	Natural Gas	NA	1.54802e+06	1.23842e+06	6.65913	7.46968	Three units of Brayton turbines. https://www.gem.wiki/Geregu_I_power_station
40067	NIGERIA	GEREGU-II	507	2212	1121484	NG	Brayton	Gas Turbine	No cooling	NA	Natural Gas	NA	1.80424e+06	1.44339e+06	6.66025	7.47158	Three units of Brayton turbines. https://www.gem.wiki/Geregu_II_power_station
40068	NIGERIA	GILCO APAPA	0.616	2433	1498.73	Oil	ICE	Diesel-Engines	Dry cooling	Air	Diesel	NA	485.587	339.911	3.35917	6.44556	By the size and fuel, it must be a small MCI generator
40069	NIGERIA	GOMBE OIL SEED PLANT	2.34	2433	5693.22	Oil	ICE	Diesel-Engines	Dry cooling	Air	Diesel	NA	1844.6	1291.22	11.2136	10.2817	Diesel engines for the Oil seed plant
40070	NIGERIA	GSK AGBARA	2	2212	4424	NG	ICE	Gas-Engines	Dry cooling	Natural Gas	Natural Gas	NA	1433.37	1003.36	3.07716	6.51113	ICE for the Glaxo Smith Kline facilities
40071	NIGERIA	GUNDUWAWA PLANT	9	2433	21897	Oil	ICE	Diesel-Engines	Dry cooling	Air	Diesel	NA	7094.62	4966.24	8.50443	12.0137	By its size and purpose I assume it is an diesel generator
40072	NIGERIA	IBADAN FACTORY	6	2433	14598	Oil	ICE	Diesel-Engines	Dry cooling	Air	Diesel	NA	4729.75	3310.82	3.89639	7.38778	By its size and purpose I assume it is an diesel generator
40073	NIGERIA	IBADAN FACTORY	1	1478	1478	Sun	PV	Rooftop	No cooling	NA	Flat	Aw - Tropical Savannah	20.7009	14.4906	3.89639	7.38778	City. https://www.thecable.ng/british-american-tobacco-nigeria-takes-bold-towards-sustainability-commissions-1mwp-dc-grid-tied-solar-panels-in-its-ibadan-factory
40074	NIGERIA	IBESE CEMENT PLANT	111	2212	245532	NG	Brayton	Gas Turbine	No cooling	NA	Natural Gas	NA	395012	316010	3.0509	7.00932	Five units of Brayton turbines
40075	NIGERIA	IBOM	689	2212	1524068	NG	Brayton	Gas Turbine	No cooling	NA	Natural Gas	NA	2.45192e+06	1.96154e+06	7.56762	4.56535	One large unit and a few smaller units. https://www.power-technology.com/data-insights/power-plant-profile-ibom-power-plant-nigeria/ https://www.gem.wiki/Ibom_power_station
40076	NIGERIA	IDI-ATA VILLAGE	0.024	1478	35.472	Sun	PV	Rooftop	No cooling	NA	Flat	Aw - Tropical Savannah	0.496822	0.347775	4.56244	7.58758	City. Cannot find it, but for its size is rooftop
40077	NIGERIA	IDU FIELD	20	2212	44240	NG	Brayton	Gas Turbine	No cooling	NA	Natural Gas	NA	71173.3	56938.6	6.59998	5.24712	Gas turbines next to the oil and gas field in Iduobosuku
40078	NIGERIA	IGANMU BAGCO	7.2	2212	15926.4	NG	ICE	Gas-Engines	Dry cooling	Air	Natural Gas	NA	5160.15	3612.1	3.35603	6.4841	Coast. Bag company. https://www.clarke-energy.com/2011/the-nigerian-bag-manufacturing-companys-power-plant-bagco/
40079	NIGERIA	IHOVBOR	450	2212	995400	NG	Brayton	Gas Turbine	No cooling	NA	Natural Gas	NA	1.6014e+06	1.28112e+06	5.62749	6.33505	Four units of Gas turbines https://www.gem.wiki/Ihovbor_power_station
40080	NIGERIA	IJU GRAMMAR SCHOOL	0.01	1478	14.78	Sun	PV	Rooftop	No cooling	NA	Flat	Aw - Tropical Savannah	0.207009	0.144906	3.37921	6.52438	City. Cannot find it, but for its size is rooftop
40081	NIGERIA	IKEJA BOTTLING	7.915	2433	19257.2	Oil	ICE	Diesel-Engines	Dry cooling	Air	Diesel	NA	6239.33	4367.53	3.35149	6.60184	By its size and purpose I assume it is an diesel generator
40082	NIGERIA	IKEJA BOTTLING COGEN	4	2212	8848	NG	ICE	Gas-Engines	Dry cooling	Air	Natural Gas	NA	2866.75	2006.72	3.35217	6.61489	Cooling towers, also solar park in 2022
40083	NIGERIA	IKEJA CADBURY	5.5	2433	13381.5	Oil	ICE	Diesel-Engines	Dry cooling	Air	Diesel	NA	4335.6	3034.92	3.34937	6.62249	Company of chocolate. Diesel generators
40084	NIGERIA	IKEJA CNL	0.4	2212	884.8	NG	ICE	Gas-Engines	Dry cooling	Air	Natural Gas	NA	286.675	200.672	3.33747	6.59422	By the size and fuel, it must be a small MCI generator
40085	NIGERIA	IKEJA DUNLOP	1	2212	2212	NG	ICE	Gas-Engines	Dry cooling	Air	Natural Gas	NA	716.687	501.681	3.33747	6.59422	By the size and fuel, it must be a small MCI generator
40086	NIGERIA	IKEJA MILL	6	2433	14598	Oil	ICE	Diesel-Engines	Dry cooling	Air	Diesel	NA	4729.75	3310.82	3.36695	6.61229	By its size and purpose I assume it is an diesel generator for the flour mills
40087	NIGERIA	IKEJA RELIANCE	1	2212	2212	NG	ICE	Gas-Engines	Dry cooling	Air	Natural Gas	NA	716.687	501.681	3.33747	6.59422	By the size and fuel, it must be a small MCI generator
40088	NIGERIA	IKORODU ENCON	39	2433	94887	Oil	ICE	Diesel-Engines	Dry cooling	Air	Diesel	NA	30743.4	21520.4	3.50867	6.61548	Near lagoon. https://dutable.com/2011/08/31/ikorodu-industrial-power-ltd-encon_31/
40089	NIGERIA	IKORODU MILL	9.9	2433	24086.7	Oil	ICE	Diesel-Engines	Dry cooling	Air	Diesel	NA	7804.08	5462.86	3.52886	6.67921	Diesel engines for the Kimberly and Clark factory in Okorodu
40090	NIGERIA	ILUPEJU ACADEMY	1.32	2212	2919.84	NG	ICE	Gas-Engines	Dry cooling	Air	Natural Gas	NA	946.027	662.219	3.35667	6.55365	Near lagoon. Assumed Diesel generator due to its size and fuel.
40091	NIGERIA	ILUPEJU PLASTICS PLANT	1.165	2433	2834.45	Oil	ICE	Diesel-Engines	Dry cooling	Air	Diesel	NA	918.359	642.852	3.35505	6.55416	By the size and fuel, it must be a small MCI generator
40092	NIGERIA	INYISHI PLANT	1	2433	2433	Oil	ICE	Diesel-Engines	Dry cooling	Air	Diesel	NA	788.291	551.804	7.16899	5.61418	Drinking water company. Assumed Diesel generator due to its size and fuel.
40093	NIGERIA	ISLAND POWER LAGOS	10	2212	22120	NG	Brayton	Gas Turbine	No cooling	NA	Natural Gas	NA	35586.7	28469.3	3.39685	6.44601	Next to Lagos lagoon
40094	NIGERIA	ISOLO POWER	3.5	2212	7742	NG	Brayton	Gas Turbine	No cooling	NA	Natural Gas	NA	12455.3	9964.26	3.39583	6.45306	I cannot find it, but according to the web page it is a gas turbine. https://www.covenantpluseng.com.ng/pgeneration.html
40095	NIGERIA	ITAKPE IRON ORE MINE	15.4	2433	37468.2	Oil	ICE	Diesel-Engines	Dry cooling	Air	Diesel	NA	12139.7	8497.78	6.32119	7.61696	Diesel engines for the mine
40096	NIGERIA	JEBBA	578.4	3861.3	2.23338e+06	Hydropower	Dammed	NA	NA	NA	NA	NA	2.5993e+08	2.5993e+08	4.789	9.1369	Reservoir
40097	NIGERIA	JEKKO FALLS	8	3861.3	30890.4	Hydropower	ROR	NA	NA	NA	NA	NA	28950.8	28950.8	8.81073	9.37226	Falls
40098	NIGERIA	JOGANA PLANT	17	2433	41361	Oil	ICE	Diesel-Engines	Dry cooling	Air	Diesel	NA	13401	9380.67	8.7128	12.0274	Diesel engines for the factory near Jogana. I cannot see it clearly, but likely a group of engines under the main roof.
40099	NIGERIA	KADUNA REFINERY	56	2433	136248	Oil	Rankine	Steam Turbine	Wet Tower	Freshwater	HFO	Aw - Tropical Savannah	618906	567330	7.48824	10.4108	Cooling towers, river nearby. chrome-extension://efaidnbmnnnibpcajpcglclefindmkaj/http://www.journalrepository.org/media/journals/BJAST_5/2015/May/Musa862015BJAST15466.pdf
40100	NIGERIA	KAINJI	760	3861.3	2934588	Hydropower	Dammed	NA	NA	NA	NA	NA	1.13517e+09	1.13517e+09	4.6118	9.8639	Reservoir
40101	NIGERIA	KAMPALA PLANT	0.6	2433	1459.8	Oil	ICE	Diesel-Engines	Dry cooling	Air	Diesel	NA	472.975	331.082	7.39727	9.03153	By the size and fuel, it must be a small MCI generator
40102	NIGERIA	KANO FMN MILL	5	2433	12165	Oil	ICE	Diesel-Engines	Dry cooling	Air	Diesel	NA	3941.46	2759.02	8.59196	12.0022	By its size and purpose I assume it is an diesel generator
40103	NIGERIA	KASHIMBILA MULTIPURPOSE	40	3861.3	154452	Hydropower	Dammed	NA	NA	NA	NA	NA	3.59569e+07	3.59569e+07	9.97445	7.25769	Operational in 2019. Reservoir. https://en.wikipedia.org/wiki/Kashimbila_Hydroelectric_Power_Station
40104	NIGERIA	KURRA FALLS	8	3861.3	30890.4	Hydropower	ROR	NA	NA	NA	NA	NA	12792.7	12792.7	8.73291	9.40123	Falls. http://www.ecowrex.org/resources/energy_generators?title_field_value=&order=field_country&sort=asc&items_per_page=20&page=7
40105	NIGERIA	KWALE OGPP	4.756	2433	11571.3	Oil	ICE	Diesel-Engines	Dry cooling	Air	Diesel	NA	3749.11	2624.38	6.51459	5.65827	Part of a gas plant, operational.
40106	NIGERIA	KWALL FALLS	2	3861.3	7722.6	Hydropower	ROR	NA	NA	NA	NA	NA	778.171	778.171	8.66667	9.56667	Falls. http://www.ecowrex.org/resources/energy_generators?title_field_value=&order=field_country&sort=asc&items_per_page=20&page=7
40107	NIGERIA	LAGOS AGROTEC	3.12	2433	7590.96	Oil	ICE	Diesel-Engines	Dry cooling	Air	Diesel	NA	2459.47	1721.63	3.39583	6.45306	By its size and purpose I assume it is an diesel generator
40108	NIGERIA	LAGOS DAILY TIMES	1.476	2433	3591.11	Oil	ICE	Diesel-Engines	Dry cooling	Air	Diesel	NA	1163.52	814.463	3.39583	6.45306	ROR. Raplaced old station in 2014. Diesel generator for the Lagos Daily Times
40109	NIGERIA	LAGOS DUMEX	5	2433	12165	Oil	ICE	Diesel-Engines	Dry cooling	Air	Diesel	NA	3941.46	2759.02	3.08231	6.51371	By its size and purpose I assume it is an diesel generator
40110	NIGERIA	LAGOS FAP	0.192	2212	424.704	NG	ICE	Gas-Engines	Dry cooling	Air	Natural Gas	NA	137.604	96.3228	3.39583	6.45306	ICE in the factory. By its size and location is a diesel engine
40111	NIGERIA	LAGOS GLAXOCHEM	5.96	2433	14500.7	Oil	ICE	Diesel-Engines	Dry cooling	Air	Diesel	NA	4698.22	3288.75	3.07816	6.51181	stops in 2023 https://www.thecable.ng/explainer-heres-why-gsk-is-leaving-nigeria-after-51-years
40112	NIGERIA	LAGOS OMO	6	2433	14598	Oil	ICE	Diesel-Engines	Dry cooling	Air	Diesel	NA	4729.75	3310.82	3.39583	6.45306	By its size and purpose I assume it is an diesel generator
40113	NIGERIA	LAGOS PALMS	2	2433	4866	Oil	ICE	Diesel-Engines	Dry cooling	Air	Diesel	NA	1576.58	1103.61	3.39583	6.45306	Shopping mall. Diesel generator as backup
40114	NIGERIA	LAGOS REFUSE	7.64	2433	18588.1	Oil	ICE	Diesel-Engines	Dry cooling	Air	Diesel	NA	6022.55	4215.78	3.33851	6.5483	Diesel generators for the waste transfer station
40115	NIGERIA	LAGOS SAVANNAH	5	2433	12165	Oil	ICE	Diesel-Engines	Dry cooling	Air	Diesel	NA	3941.46	2759.02	3.39583	6.45306	By its size and purpose I assume it is an diesel generator
40116	NIGERIA	LAGOS SUPERBRU	3.2	2433	7785.6	Oil	ICE	Diesel-Engines	Dry cooling	Air	Diesel	NA	2522.53	1765.77	3.39583	6.45306	By its size and purpose I assume it is an diesel generator
40117	NIGERIA	LAKE CHAD IRR	14.331	2433	34867.3	Oil	ICE	Diesel-Engines	Dry cooling	Air	Diesel	NA	11297	7907.9	13.8219	13.0942	I cannot find it, but it is probably a group of diesel engines for the villages next to the Lake Chad
40118	NIGERIA	LEKKI CHEVRON	5.4	2433	13138.2	Oil	ICE	Diesel-Engines	Dry cooling	Air	Diesel	NA	4256.77	2979.74	3.53107	6.44235	Headquarters chevron. Diesel generators
40119	NIGERIA	LEKKI FREE ZONE	12	2212	26544	NG	ICE	Gas-Engines	Dry cooling	Air	Natural Gas	NA	8600.25	6020.17	4.06065	6.41908	Coast. https://lfzdc.org/portfolio/12mw-power-plant/
40120	NIGERIA	LEKKI PENINSULA	8.5	2212	18802	NG	ICE	Gas-Engines	Dry cooling	Air	Natural Gas	NA	6091.84	4264.29	3.48357	6.46742	Minigrid burning natural gas in reciprocating engines. https://www.crunchbase.com/organization/pipp-lvi-genco https://www.nigeriaenergyfuture.org/gas/12-gas/34-captive-gas-generation-in-lekki
40121	NIGERIA	LOWER USUMA DAM	1.2	1478	1773.6	Sun	PV	Land	No cooling	NA	Flat	Aw - Tropical Savannah	174.559	122.191	7.39746	9.19168	Forest. https://www.offgridnigeria.com/1-2mw-lower-usuma-dam-solar-plant-completed-feed-excess-capacity-grid/
40122	NIGERIA	MAINLAND IPP	8.8	2212	19465.6	NG	ICE	Gas-Engines	Dry cooling	Air	Natural Gas	NA	6306.85	4414.79	3.34058	6.58509	https://www.cetenergyng.net/jvs-and-affiliates/mainland-power/
40123	NIGERIA	MAKURDI GON	3	2433	7299	Oil	ICE	Diesel-Engines	Dry cooling	Air	Diesel	NA	2364.87	1655.41	8.5121	7.7411	Diesel generators for the Hospital unit
40124	NIGERIA	MFAMOSING CEMENT	48	2433	116784	Oil	ICE	Diesel-Engines	Dry cooling	Air	Diesel	NA	37838	26486.6	8.51369	5.06213	Dry cooling, racks of fans. https://archive.businessday.ng/enterpreneur/article/unicems-mfamosing-plant-beats-expectations/
40125	NIGERIA	MINNA HYBRID	0.12	2433	291.96	Oil	ICE	Diesel-Engines	Dry cooling	Air	Diesel	NA	94.595	66.2165	6.54632	9.58355	By its name, size and fuel we can consider it as a hybrid between PV and diesel
40126	NIGERIA	MINNA HYBRID	0.051	1478	75.378	Sun	PV	Rooftop	No cooling	NA	Flat	Aw - Tropical Savannah	1.05575	0.739022	6.54632	9.58355	City. Cannot find it, but for its size is rooftop
40127	NIGERIA	MURTALA MUHAMMED IA	39.85	2433	96955.1	Oil	ICE	Diesel-Engines	Dry cooling	Air	Diesel	NA	31413.4	21989.4	3.32455	6.56808	Diesel engines power plant for the International Airport}
40128	NIGERIA	NEW FINIMA	0.8	2433	1946.4	Oil	ICE	Diesel-Engines	Dry cooling	Air	Diesel	NA	630.633	441.443	7.15682	4.42009	By the size and fuel, it must be a small MCI generator
40129	NIGERIA	NORTHRICH CEMENT PLANT	12	2433	29196	Oil	ICE	Diesel-Engines	Dry cooling	Air	Diesel	NA	9459.5	6621.65	5.17367	13.0616	Rack of fans, air cooling
40130	NIGERIA	OANDO PROJECT (KWALE)	480	2212	1061760	NG	Combined	Combined Cycle (CC)	Wet Tower	Freshwater	Natural Gas	Am - Tropical Monsoon	3.05459e+06	1.08518e+06	6.57555	5.70894	Cooling towers, near river. Operational in 2020. https://www.gem.wiki/Oando_Kwale_power_station
40131	NIGERIA	OBAJANA CEMENT PLANT	135	2212	298620	NG	Brayton	Gas Turbine	No cooling	NA	Natural Gas	NA	480420	384336	6.42893	7.92349	Three units of Brayton turbines
40132	NIGERIA	OBARETIN ESTATE	3.7	2500	9250	Biomass	Rankine	Steam Turbine	No cooling	NA	Palm Oil	NA	1500.65	1050.45	5.60375	6.33499	Palm oil plantation. No cooling. https://www.facebook.com/palmproducts17/photos/a.2541388509418625/3641864046037727/?type=3
40133	NIGERIA	OBAYANTOR-1	0.024	1478	35.472	Sun	PV	Rooftop	No cooling	NA	Flat	Aw - Tropical Savannah	0.496822	0.347775	5.61338	6.36669	City. Cannot find it, but for its size is rooftop
40134	NIGERIA	OBIAFU-OBRIKOM GAS PLANT	78.9	2212	174527	NG	Brayton	Gas Turbine	No cooling	NA	Natural Gas	NA	280779	224623	6.65671	5.39083	Gas turbines in the gas plant
40135	NIGERIA	OBIAFU-OBRIKOM GAS PLANT	12.5	2433	30412.5	Oil	ICE	Diesel-Engines	Dry cooling	Air	Diesel	NA	9853.64	6897.55	6.65477	5.38994	Diesel engines next to the gas turbines in the Obiafu-Obrikom Gas plant
40136	NIGERIA	OGBA BREWERY	9.9	2212	21898.8	NG	ICE	Gas-Engines	Dry cooling	Air	Natural Gas	NA	7095.21	4966.64	3.34196	6.62	Gas engines for the brewery https://www.clarke-energy.com/2012/guinness-ogba-combined-heat-power-plant/
40137	NIGERIA	OGIJO	42	2433	102186	Oil	ICE	Diesel-Engines	Dry cooling	Air	Diesel	NA	33108.2	23175.8	3.51812	6.68579	Diesel engine that also works with Natural Gas. https://www.csi-es.com/nigeria-ogijo-42mw-dual-fuel-diesel-natural-gas-power-plant/
40138	NIGERIA	OGUN GOVT OFFICE COMPL	7	2433	17031	Oil	ICE	Diesel-Engines	Dry cooling	Air	Diesel	NA	5518.04	3862.63	3.37416	7.11832	By its size and purpose I assume it is an diesel generator
40139	NIGERIA	OKPAI	480	2212	1061760	NG	Combined	Combined Cycle (CC)	Wet Tower	Freshwater	Natural Gas	Am - Tropical Monsoon	3.05459e+06	1.08518e+06	6.57592	5.70969	Combined cycle. Operational in 2005. https://www.gem.wiki/Oando_Kwale_power_station
40140	NIGERIA	OLORUNSOGO-II	754	2212	1667848	NG	Combined	Combined Cycle (CC)	Wet Tower	Freshwater	Natural Gas	Aw - Tropical Savannah	4.79825e+06	1.70464e+06	3.31565	6.88553	Four sets of cooling towers. Four units of combined cycle. Operational in 2015. https://www.gem.wiki/Olorunsogo_II_power_station
40141	NIGERIA	OMOKU-I	150	2212	331800	NG	Brayton	Gas Turbine	No cooling	NA	Natural Gas	NA	533800	427040	6.6627	5.39002	Brayton. Gas turbines
40142	NIGERIA	OMOKU-II	226	2212	499912	NG	Brayton	Gas Turbine	No cooling	NA	Natural Gas	NA	804258	643407	6.66497	5.38502	Cooling towers, Operational 2018/2019. https://www.gem.wiki/Omoku-II_power_station
40143	NIGERIA	OMOTOSHO-I	335.2	2212	741462	NG	Brayton	Gas Turbine	No cooling	NA	Natural Gas	NA	1.19286e+06	954292	4.71046	6.73598	Part of the Omotosho Complex. Movable gas turbines.
40144	NIGERIA	OMOTOSHO-II	512	2212	1132544	NG	Brayton	Gas Turbine	No cooling	NA	Natural Gas	NA	1.82204e+06	1.45763e+06	4.7101	6.73281	Open cycle gas turbine. Only four of the six units are constructed. Therefore only 512 MW installed. https://www.gem.wiki/Omotosho_II_power_station
40145	NIGERIA	ONIBAMBU VILLAGE	0.024	1478	35.472	Sun	PV	Rooftop	No cooling	NA	Flat	Aw - Tropical Savannah	0.496822	0.347775	4.56244	7.58758	City. Cannot find it, but for its size is rooftop
40146	NIGERIA	OSHOGBO	3.5	2433	8515.5	Oil	ICE	Diesel-Engines	Dry cooling	Air	Diesel	NA	2759.02	1931.31	4.56667	7.76667	By its size and purpose I assume it is an diesel generator
40147	NIGERIA	OTTA	1.6	2212	3539.2	NG	ICE	Gas-Engines	Dry cooling	Air	Natural Gas	NA	1146.7	802.69	3.23274	6.68414	By its size an location I assume ti is a diesel generator in the Helium Plant (Helison)
40148	NIGERIA	PORT HARCOURT	50	2212	110600	NG	Rankine	Steam Turbine	Wet Tower	Freshwater	Natural Gas	Am - Tropical Monsoon	506587	404013	7.01063	4.77399	Cooling towers, river nearby
40149	NIGERIA	PORT HARCOURT AIR LIQUIDE	1.476	2433	3591.11	Oil	ICE	Diesel-Engines	Dry cooling	Air	Diesel	NA	1163.52	814.463	7.0134	4.77742	By the size and fuel, it must be a small MCI generator
40150	NIGERIA	PORT HARCOURT CENTRAL	15	2212	33180	NG	Brayton	Gas Turbine	No cooling	NA	Natural Gas	NA	53380	42704	7.01167	4.77833	Gas turbines
40151	NIGERIA	PORT HARCOURT FA	1.2	2212	2654.4	NG	ICE	Gas-Engines	Dry cooling	Air	Natural Gas	NA	860.025	602.017	7.0134	4.77742	By the size and fuel, it must be a small MCI generator
40152	NIGERIA	PORT HARCOURT IMIL	14	2212	30968	NG	ICE	Gas-Engines	Dry cooling	Air	Natural Gas, LFO	NA	10033.6	7023.54	6.94857	4.87604	Natural gas running reciprocating engines for the syringes plant. https://www.clarke-energy.com/2013/powering-the-fight-against-malaria-aids/
40153	NIGERIA	PORT HARCOURT REF GENESIS	75	2212	165900	NG	Brayton	Gas Turbine	No cooling	NA	Natural Gas	NA	266900	213520	7.11633	4.76267	gas turbines. anguardngr.com/2015/03/ge-installs-75mw-turbines-in-ph-refinery/
40154	NIGERIA	PORT HARCOURT WAG	1	2433	2433	Oil	ICE	Diesel-Engines	Dry cooling	Air	Diesel	NA	788.291	551.804	7.0134	4.77742	By the size and fuel, it must be a small MCI generator
40155	NIGERIA	PRODUCTS PIPE PLANT	0.3	2433	729.9	Oil	ICE	Diesel-Engines	Dry cooling	Air	Diesel	NA	236.487	165.541	7.16743	4.70333	By the size and fuel, it must be a small MCI generator
40156	NIGERIA	QUA IBOE TERMINAL	25	2212	55300	NG	Brayton	Gas Turbine	No cooling	NA	Natural Gas	NA	88966.6	71173.3	8.01302	4.54932	Gas turbines under a roof in the Gas terminal
40157	NIGERIA	RIVERS STATE UNIV	5.9	2433	14354.7	Oil	ICE	Diesel-Engines	Dry cooling	Air	Diesel	NA	4650.92	3255.64	7.04984	4.81555	By its size and purpose I assume it is an diesel generator
40158	NIGERIA	SANGO PLANT	0.8	2212	1769.6	NG	ICE	Gas-Engines	Dry cooling	Air	Natural Gas	NA	573.35	401.345	3.88028	7.4275	By the size and fuel, it must be a small MCI generator
40159	NIGERIA	SAPELE I	1020	2212	2256240	NG	Rankine	Steam Turbine	Once through	Freshwater	Natural Gas	Am - Tropical Monsoon	2.98928e+08	1.62275e+06	5.64498	5.92614	In the Sapele Complex. Once through from the river Benin. https://www.gem.wiki/Sapele_power_station It indicates that there is only four units operating.
40160	NIGERIA	SAPELE II (Private)	452	2212	999824	NG	Brayton	Gas Turbine	No cooling	NA	Natural Gas	NA	1.60852e+06	1.28681e+06	5.64498	5.92614	In the Sapele Complex. Private part of the Sapele Complex. Four units of gas turbines. No cooling. https://www.gem.wiki/Sapele_II_power_station https://ndphc.net/sapele
40161	NIGERIA	SHAGAMU CEMENT	3.8	2433	9245.4	Oil	ICE	Diesel-Engines	Dry cooling	Air	Diesel	NA	2995.51	2096.86	3.64776	6.84323	By its size and purpose I assume it is an diesel generator
40162	NIGERIA	SHIRORO	600	3861.3	2316780	Hydropower	Dammed	NA	NA	NA	NA	NA	2.63547e+08	2.63547e+08	6.8167	9.9667	Reservoir
40163	NIGERIA	SHORELINE TAFL	8	2212	17696	NG	ICE	Gas-Engines	Dry cooling	Air	Natural Gas	NA	5733.5	4013.45	3.35721	6.54718	Shoreline company that procduces electric equipment. It has a group of generators on the facade of the building
40164	NIGERIA	SSC BLOCK ABC	2.7	2433	6569.1	Oil	ICE	Diesel-Engines	Dry cooling	Air	Diesel	NA	2128.39	1489.87	7.04984	4.81555	Diesel generators for the ABC hospital
40165	NIGERIA	SSC PODIUM BLOCK	1.15	2433	2797.95	Oil	ICE	Diesel-Engines	Dry cooling	Air	Diesel	NA	906.535	634.575	7.04984	4.81555	By the size and fuel, it must be a small MCI generator
40166	NIGERIA	SSC POINT BLOCK	1.665	2433	4050.95	Oil	ICE	Diesel-Engines	Dry cooling	Air	Diesel	NA	1312.51	918.754	7.04984	4.81555	By its size and fuel I assume it is an ICE with diesel
40167	NIGERIA	STALLION HOUSE	3.4	2433	8272.2	Oil	ICE	Diesel-Engines	Dry cooling	Air	Diesel	NA	2680.19	1876.13	3.42199	6.42806	By its size and purpose I assume it is an diesel generator for the Stallion House Building
40168	NIGERIA	SVACO IKEJA	8	2433	19464	Oil	ICE	Diesel-Engines	Dry cooling	Air	Diesel	NA	6306.33	4414.43	3.35149	6.60184	By its size and purpose I assume it is an diesel generator
40169	NIGERIA	TOWER POWER UTILITY	14	2212	30968	NG	ICE	Gas-Engines	Dry cooling	Air	Natural Gas, LFO	NA	10033.6	7023.54	3.19888	6.67532	Combustion engines for the Tower Aluminium Rolling Mills
40170	NIGERIA	TRANS-AMADI	136	2212	300832	NG	Brayton	Gas Turbine	No cooling	NA	Natural Gas	NA	483979	387183	7.02848	4.82609	Three units of gas turbines. https://fipl-ng.com/plants/
40171	NIGERIA	TUNGA	0.4	3861.3	1544.52	Hydropower	ROR	NA	NA	NA	NA	NA	0	0	10.26	8.00549	ROR
40172	NIGERIA	UBA LAGOS	6.48	2433	15765.8	Oil	ICE	Diesel-Engines	Dry cooling	Air	Diesel	NA	5108.13	3575.69	3.39583	6.45306	Diesel generator for the offices of the bank.
40173	NIGERIA	UNIPOWER AGBARA	8.5	2212	18802	NG	ICE	Gas-Engines	Dry cooling	Air	Natural Gas	NA	6091.84	4264.29	3.10306	6.50525	Combustion engines running on Natural Gas in Agbara
40174	NIGERIA	UNIV NIGERIA PLANT	1.7	2433	4136.1	Oil	ICE	Diesel-Engines	Dry cooling	Air	Diesel	NA	1340.1	938.067	7.41105	6.86893	Diesel engine for the university
40175	NIGERIA	UNIVERSITY OF LAGOS	4.129	2433	10045.9	Oil	ICE	Diesel-Engines	Dry cooling	Air	Diesel	NA	3254.86	2278.4	3.39583	6.45306	By its size and purpose I assume it is an diesel generator
40176	NIGERIA	VICTORIA ISLAND PLANT	1.2	2212	2654.4	NG	ICE	Gas-Engines	Dry cooling	Air	Natural Gas	NA	860.025	602.017	3.42199	6.42806	By the size and fuel, it must be a small MCI generator
40177	NIGERIA	WAYA DAM	0.15	3861.3	579.195	Hydropower	Dammed	NA	NA	NA	NA	NA	0	0	10.0166	10.3448	Reservoir. https://dailytrust.com/two-bauchi-communities-see-the-light/
40178	NIGERIA	WEMPCO PLANT	6	2433	14598	OIL	ICE	Diesel-Engines	Dry cooling	Air	HFO	NA	4729.75	3310.82	3.40887	6.7101	Diesel generators for the plant. https://ningbozhongcedongli.en.ec21.com/Wempco_6mw_Power_Plant--5838675_5838809.html
40179	NIGERIA	YENEGOA	0.96	3861.3	3706.85	Hydropower	ROR	NA	NA	NA	NA	NA	0	0	6.27477	4.92116	ROR. Not a lot of information regarding this power plant.
40180	NIGERIA	ZARIA COTTON	1.56	2433	3795.48	Oil	ICE	Diesel-Engines	Dry cooling	Air	Diesel	NA	1229.73	860.814	7.7227	11.1113	By its size an location I assume ti is a diesel generator in the Helium Plant (Helison)
41001	REUNION	AGRINERGIE-3	1.86	1392	2589.12	Sun	PV	Land	No cooling	NA	Flat	Af - Tropical Rainforest	254.823	178.376	55.3928	-21.2517	Forest
41002	REUNION	AGRINERGIE-5	1.4	1392	1948.8	Sun	PV	Land	No cooling	NA	Flat	Af - Tropical Rainforest	191.802	134.262	55.4039	-21.2646	Forest
41003	REUNION	AGRISOL	1.59	1392	2213.28	Sun	PV	Rooftop	No cooling	NA	Flat	Af - Tropical Rainforest	30.9993	21.6995	55.6579	-20.9636	City
41004	REUNION	BARDZOUR	9	1392	12528	Sun	PV	Land	No cooling	NA	Flat	Af - Tropical Rainforest	1233.01	863.11	55.3161	-20.9514	City
41005	REUNION	BOIS-ROUGE	108	6676	721008	Coal	Rankine	Steam Turbine	Wet tower	Freshwater	Coal - Circulating Fluidized bed	Af - Tropical Rainforest	2.72931e+06	1.91052e+06	55.636	-20.9144	Probable use of biomass as well (SUGARCANE), thus fluidized bed. Satellite images show a connection with a Sucrerie https://fr.wikipedia.org/wiki/Usine_de_Bois_Rouge https://www.gem.wiki/Bois-Rouge_power_station
41006	REUNION	BRAS DE LIANES	2.24	3487.2	7811.33	Hydropower	ROR	NA	NA	NA	NA	NA	79749.2	79749.2	55.6782	-20.9967	ROR
41007	REUNION	BRAS DE PLAINE	4.6	3487.2	16041.1	Hydropower	ROR	NA	NA	NA	NA	NA	576350	576350	55.4564	-21.2851	ROR
41008	REUNION	CHEMIN CANAL	2.5	1392	3480	Sun	PV	Land	No cooling	NA	Flat	Af - Tropical Rainforest	342.504	239.753	55.4749	-21.2795	Forest
41009	REUNION	COLLEGE LACAUSSADE	0.153	1392	212.976	Sun	PV	Rooftop	No cooling	NA	Flat	Af - Tropical Rainforest	2.98295	2.08806	55.5328	-21.035	City
41010	REUNION	COLLEGE REYDELLET	0.102	1392	141.984	Sun	PV	Rooftop	No cooling	NA	Flat	Af - Tropical Rainforest	1.98863	1.39204	55.4466	-20.884	City
41011	REUNION	E. LECLERC SHOPPING CENTRE in Saint-Leu	1	1100	1100	Sun	PV	Rooftop	No cooling	NA	Flat	Af - Tropical Rainforest	15.4066	10.7846	55.301	-21.2184	City. https://www.albioma.com/en/site/reunion-island/e-leclerc/
41012	REUNION	INTI	3.5	1392	4872	Sun	PV	Land	No cooling	NA	Flat	Af - Tropical Rainforest	479.506	335.654	55.575	-21.2355	Forest
41013	REUNION	IRIS HOARAU SCHOOL in Saint-Denis	0.009	1500	13.5	Sun	PV	Rooftop	No cooling	NA	Flat	Af - Tropical Rainforest	0.189081	0.132357	55.4432	-20.8802	https://www.albioma.com/en/site/reunion-island/iris-hoarau/
41014	REUNION	LA PERRIERE	10	1121	11210	Wind	Wind turbine	Onshore	No cooling	NA	NA	NA	0.00148521	0.00148521	55.5944	-20.9489	Operational till 2021. https://www.gem.wiki/La_Perri%C3%A8re_wind_farm
41015	REUNION	LA STAR	2	1000	2000	Sun	PV	Land	No cooling	NA	Flat	Af - Tropical Rainforest	196.841	137.789	55.6012	-20.9168	Forest. https://www.albioma.com/en/site/reunion-island/la-star/
41016	REUNION	LANGEVIN	3.6	3487.2	12553.9	Hydropower	ROR	NA	NA	NA	NA	NA	15189.6	15189.6	55.6514	-21.3808	ROR
41017	REUNION	LA-ROSERAYE	15.3	1392	21297.6	Sun	PV	Land	No cooling	NA	Flat	Af - Tropical Rainforest	2096.12	1467.29	55.7925	-21.1362	Forest. https://www.power-technology.com/marketdata/power-plant-profile-sainte-rose-solar-pv-park-reunion/
41018	REUNION	LE GOL	56	5629	315224	Biomass	Rankine	Steam Turbine	Wet Tower	Freshwater	Sugarcane	Af - Tropical Rainforest	1.4319e+06	1.31258e+06	55.397	-21.2792	Cooling towers
41019	REUNION	LE GOL	64	6676	427264	Coal	Rankine	Steam Turbine	Wet tower	Freshwater	Coal - Circulating fluidized bed	Af - Tropical Rainforest	1.61737e+06	1.13216e+06	55.397	-21.2792	Two sets of cooling towers Operational in 2019. https://www.power-technology.com/marketdata/power-plant-profile-saint-pierre-biomass-power-plant-reunion/ It says that it also works with biomass, therefore we assume it is fluidized bed https://www.gem.wiki/Le_Gol_power_station
41020	REUNION	LE PORT	60	4232	253920	Oil	Brayton	Gas Turbine	No cooling	NA	Diesel	NA	408506	326805	55.2919	-20.9373	Two gas turbines, likely using Diesel
41021	REUNION	LE PORT SAPRIM	1	1392	1392	Sun	PV	Rooftop	No cooling	NA	Flat	Af - Tropical Rainforest	19.4964	13.6475	55.2884	-20.9322	City. Estimate
41022	REUNION	LE SYNDICAT	2.1	1392	2923.2	Sun	PV	Land	No cooling	NA	Flat	Af - Tropical Rainforest	287.703	201.392	55.434	-21.3247	City
41023	REUNION	LES CEDRES AKUO	9	1392	12528	Sun	PV	Rooftop	No cooling	NA	Flat	Af - Tropical Rainforest	175.467	122.827	55.3697	-21.2498	https://www.power-technology.com/marketdata/les-cedres-solar-pv-park-battery-energy-storage-system-reunion/
41024	REUNION	LES ORGUES	1.2	3487.2	4184.64	Hydropower	ROR	NA	NA	NA	NA	NA	84060.3	84060.3	55.7878	-21.1263	ROR. Close to the sea within 5 km.
41025	REUNION	LIGNE DES 400	2.65	1392	3688.8	Sun	PV	Land	No cooling	NA	Flat	Af - Tropical Rainforest	363.054	254.138	55.4963	-21.2876	Forest
41026	REUNION	LOGISTISUD	1.29	1392	1795.68	Sun	PV	Rooftop	No cooling	NA	Flat	Af - Tropical Rainforest	25.1503	17.6052	55.4287	-21.3169	City
41027	REUNION	LYCEE ROLLAND GARROS	0.075	4232	317.4	Oil	ICE	Diesel-Engines	Dry cooling	Air	Diesel	NA	102.838	71.9863	55.518	-21.2831	By the size and fuel, it must be a small MCI generator
41028	REUNION	MANGASSAYE	5.1	1392	7099.2	Sun	PV	Land	No cooling	NA	Flat	Af - Tropical Rainforest	698.708	489.096	55.8056	-21.1643	Forest
41029	REUNION	PHOEBUS	1.1	1392	1531.2	Sun	PV	Land	No cooling	NA	Flat	Af - Tropical Rainforest	150.702	105.491	55.5913	-20.9484	Forest
41030	REUNION	PIERREFONDS	3	1392	4176	Sun	PV	Land	No cooling	NA	Flat	Af - Tropical Rainforest	411.005	287.703	55.4401	-21.3186	Forest. https://pitchbook.com/profiles/company/431734-33. It seems bigger than 3MW
41031	REUNION	PORT QUEST	1.34	1392	1865.28	Sun	PV	Rooftop	No cooling	NA	Flat	Af - Tropical Rainforest	26.1252	18.2876	55.2886	-20.9312	City. https://www.albioma.com/en/site/reunion-island/e-leclerc/
41032	REUNION	PORT SOLAR	2.43	1392	3382.56	Sun	PV	Land	No cooling	NA	Flat	Af - Tropical Rainforest	332.914	233.04	55.2825	-20.9523	Forest
41033	REUNION	PORT-EST	220	4232	931040	Oil	ICE	Diesel-Engines	Dry cooling	Air	Diesel	NA	301657	211160	55.3268	-20.9305	Coast. Internal combustion combined cycle. https://www.gem.wiki/Le_Port_Est_power_station
41034	REUNION	RAVATE ST-PIERRE	0.186	1392	258.912	Sun	PV	Rooftop	No cooling	NA	Flat	Af - Tropical Rainforest	3.62633	2.53843	55.4572	-21.3357	City
41035	REUNION	REUNION CETO	2	3487.2	6974.4	Hydropower	NA	NA	NA	NA	NA	NA	0	0	55.6	-21.1	Wave energy. https://www.hydro-international.com/content/news/wave-energy-for-la-reunion
41036	REUNION	RIVIERE DE L'EST	80	3487.2	278976	Hydropower	ROR	NA	NA	NA	NA	NA	744055	744055	55.7667	-21.1	ROR. Close to the sea within 5 km. https://www.hydroreview.com/business-finance/alstom-hydro-expands-reunion-islands-60-mw-riviere-de-lest/#gref
41037	REUNION	SAINTE-ROSE REUNION	6.3	1121	7062.3	Wind	Wind turbine	Onshore	No cooling	NA	NA	NA	0.00093568	0.00093568	55.8094	-21.1527	https://fr.wikipedia.org/wiki/Parc_%C3%A9olien_de_Sainte-Rose
41038	REUNION	SAINT-PIERRE LANDFILL	41	5629	230789	Biomass	ICE	Gas-Engines	Dry cooling	Air	Biogas - Landfill	NA	74775.6	52342.9	55.4555	-21.3298	Methane from landfill to electricity. Air cooling
41039	REUNION	ST-ANNE KART TRACK	1	1392	1392	Sun	PV	Rooftop	No cooling	NA	Flat	Af - Tropical Rainforest	19.4964	13.6475	55.7561	-21.1122	City. Estimate. It seems smaller
41040	REUNION	TAKAMAKA	43.4	3487.2	151344	Hydropower	ROR	NA	NA	NA	NA	NA	0	0	55.8	-21.3	ROR
41041	REUNION	TOITURE	0.135	1392	187.92	Sun	PV	Rooftop	No cooling	NA	Flat	Af - Tropical Rainforest	2.63201	1.84241	55.4727	-21.3153	City
42001	RWANDA	AGATOBWE	0.39	3075.3	1199.37	Hydropower	ROR	NA	NA	NA	NA	NA	0	0	29.6788	-2.7536	ROR. https://www.reg.rw/what-we-do/generation/power-plant/ /efaidnbmnnnibpcajpcglclefindmkaj/https://prommpt.com/wp-content/uploads/2020/02/Rwanda-hydro.pdf
42002	RWANDA	CYIMBILI	0.3	3075.3	922.59	Hydropower	ROR	NA	NA	NA	NA	NA	0	0	29.3843	-1.9577	ROR. https://openinframap.org/stats/area/Rwanda/plants
42003	RWANDA	GASEKE	0.5	3075.3	1537.65	Hydropower	ROR	NA	NA	NA	NA	NA	0	0	29.635	-1.49984	ROR. https://www.eastafricanpower.com/projet-3
42004	RWANDA	GASHASHI	0.3	3075.3	922.59	Hydropower	ROR	NA	NA	NA	NA	NA	0	0	29.3843	-1.9577	ROR. https://primeenergyltd.com/cases/gashashi/
42005	RWANDA	GATSATA	4.8	3474	16675.2	Oil	ICE	Diesel-Engines	Dry cooling	Air	Diesel	NA	5402.76	3781.93	30.0429	-1.9214	Emergency power plant. Diesel generator. http://www.globalpowersystems.eu/en/project-detail/gatsata-emergency-power-plant-2004-2005/
42006	RWANDA	GATUBWE	0.2	3075.3	615.06	Hydropower	ROR	NA	NA	NA	NA	NA	0	0	29.5033	-2.2921	ROR
42007	RWANDA	GICIYE I and II	8	3075.3	24602.4	Hydropower	ROR	NA	NA	NA	NA	NA	44749.1	44749.1	29.5586	-1.70509	ROR. https://www.reg.rw/what-we-do/generation/power-plant/
42008	RWANDA	GICIYE III	9.8	3075.3	30137.9	Hydropower	ROR	NA	NA	NA	NA	NA	33760.4	33760.4	29.5586	-1.70509	Emergency power plant. Diesel generator. http://www.globalpowersystems.eu/en/project-detail/gatsata-emergency-power-plant-2004-2005/
42009	RWANDA	GIHIRA	1.8	3075.3	5535.54	Hydropower	ROR	NA	NA	NA	NA	NA	13476	13476	30.1219	-1.7668	chrome-extension://efaidnbmnnnibpcajpcglclefindmkaj/https://waterportal.rwb.rw/sites/default/files/inline-files/gtz2009-en-targetmarketanalysis-hydro-rwanda.pdf
42010	RWANDA	GIKONDO RENTAL	10	3474	34740	Oil	ICE	Diesel-Engines	Dry cooling	Air	Diesel	NA	11255.8	7879.03	30.0771	-1.9664	University of Rwanda. I cannot see it in the images we have available, but likely a group of diesel engines
42011	RWANDA	GISENYI	1.7	3075.3	5228.01	Hydropower	ROR	NA	NA	NA	NA	NA	18834.8	18834.8	29.2564	-1.70278	chrome-extension://efaidnbmnnnibpcajpcglclefindmkaj/https://waterportal.rwb.rw/sites/default/files/inline-files/gtz2009-en-targetmarketanalysis-hydro-rwanda.pdf
42012	RWANDA	HOPITAL KIRINDA	0.162	3075.3	498.199	Hydropower	ROR	NA	NA	NA	NA	NA	0	0	29.5799	-2.1863	ROR
42013	RWANDA	JABANA	27.8	3474	96577.2	Oil	ICE	Diesel-Engines	Dry cooling	Air	Diesel	NA	31291	21903.7	30.0742	-1.88228	Diesel engines with rack of cooling fans
42014	RWANDA	JANJA	0.2	3075.3	615.06	Hydropower	ROR	NA	NA	NA	NA	NA	0	0	29.679	-1.6834	ROR
42015	RWANDA	KABUYE SUGAR	10	198	1980	Biomass	Rankine	Steam Turbine	No cooling	NA	Sugarcane	NA	321.219	224.853	30.0703	-1.8906	No cooling. River nearby. https://www.cnbcafrica.com/2018/rwandas-kabuye-sugar-works-to-start-producing-energy/
42016	RWANDA	KAVUMU DISTRICT	0.3	3075.3	922.59	Hydropower	ROR	NA	NA	NA	NA	NA	0	0	30.0798	-1.6851	Operational in 2017. ://efaidnbmnnnibpcajpcglclefindmkaj/https://www.reg.rw/fileadmin/user_upload/RwandeseHydropowerSectorStatusDECEMBE20.pdf
42017	RWANDA	KIBUYE KIVUWATT	26	3474	90324	NG	ICE	Gas-Engines	Dry cooling	Air	Natural Gas	NA	29265	20485.5	29.3197	-2.06812	Operational in 2016. Racks of fans for dry cooling. Next to lake
42018	RWANDA	KIBUYE POWER	3.6	3474	12506.4	NG	ICE	Gas-Engines	Dry cooling	Air	Natural Gas	NA	4052.07	2836.45	29.2564	-1.72753	I cannot find it, but likely a group of ICE workign with natural gas
42019	RWANDA	KIGALI SEZ	10	3474	34740	Oil	ICE	Diesel-Engines	Dry cooling	Air	Diesel	NA	11255.8	7879.03	30.0663	-1.89053	Diesel engines next to the substation
42020	RWANDA	KIGASA	0.272	3075.3	836.482	Hydropower	ROR	NA	NA	NA	NA	NA	0	0	30.158	-2.03106	ROR. Operational in 2020. https://www.reg.rw/what-we-do/generation/power-plant/
42021	RWANDA	KINYAMI	0.012	3075.3	36.9036	Hydropower	ROR	NA	NA	NA	NA	NA	0	0	30.0675	-1.5763	ROR
42022	RWANDA	MAZIMERU	0.5	3075.3	1537.65	Hydropower	ROR	NA	NA	NA	NA	NA	0	0	30.1398	-2.009	ROR. https://energypedia.info/wiki/Mazimeru
42023	RWANDA	MOUNT JALI	0.25	1300	325	Sun	PV	Land	No cooling	NA	Flat	Aw - Tropical Savannah	31.9867	22.3907	30.0162	-1.88444	Forest. https://en.wikipedia.org/wiki/Kigali_Solaire
42024	RWANDA	MUKUGU PICO power plant	0.016	3075.3	49.2048	Hydropower	ROR	NA	NA	NA	NA	NA	0	0	29.4761	-2.80409	Very small, probably a small turbine used in an irrigation scheme
42025	RWANDA	MUKUNGWA RENTAL	5	3474	17370	Oil	ICE	Diesel-Engines	Dry cooling	Air	Diesel	NA	5627.88	3939.51	29.7409	-1.8455	By its size and purpose I assume it is an diesel generator
42026	RWANDA	MUKUNGWA-I	12.4	3075.3	38133.7	Hydropower	ROR	NA	NA	NA	NA	NA	46663.5	46663.5	29.7054	-1.52584	ROR
42027	RWANDA	MUKUNGWA-II	3.6	3075.3	11071.1	Hydropower	ROR	NA	NA	NA	NA	NA	12522.3	12522.3	29.6352	-2.5757	ROR. https://www.enco.energy/portfolio/mukungwa-ii-hydropower-plant-rehabilitation/
42028	RWANDA	MURUNDA	0.1	3075.3	307.53	Hydropower	ROR	NA	NA	NA	NA	NA	0	0	29.3843	-1.9577	ROR. https://www.reg.rw/what-we-do/generation/power-plant/
42029	RWANDA	MUSARARA	0.438	3075.3	1346.98	Hydropower	ROR	NA	NA	NA	NA	NA	0	0	29.6035	-2.55466	ROR
42030	RWANDA	MUTUBO	0.2	3075.3	615.06	Hydropower	ROR	NA	NA	NA	NA	NA	0	0	29.5045	-2.8067	ROR
42031	RWANDA	NKORA	0.68	3075.3	2091.2	Hydropower	ROR	NA	NA	NA	NA	NA	0	0	29.3843	-1.9577	ROR
42032	RWANDA	NSHILI-I	0.4	3075.3	1230.12	Hydropower	ROR	NA	NA	NA	NA	NA	0	0	30.1398	-2.009	ROR
42033	RWANDA	NTARUKA	11.7	2456.4	28739.9	Hydropower	Dammed	NA	NA	NA	NA	NA	2.06965e+06	2.06965e+06	29.756	-1.47632	In lake. //efaidnbmnnnibpcajpcglclefindmkaj/https://www.reg.rw/fileadmin/user_upload/Ntaruka_HPP_ESA.pdf
42034	RWANDA	NTARUKA-A	2	3075.3	6150.6	Hydropower	ROR	NA	NA	NA	NA	NA	6764.27	6764.27	30.048	-2.1115	ROR. Operational in 2018. //efaidnbmnnnibpcajpcglclefindmkaj/https://www.reg.rw/fileadmin/user_upload/RwandeseHydropowerSectorStatusDECEMBE20.pdf
42035	RWANDA	NYABAHANGA	0.2	3075.3	615.06	Hydropower	ROR	NA	NA	NA	NA	NA	0	0	29.31	-1.8752	https://www.reg.rw/what-we-do/generation/power-plant/
42036	RWANDA	NYABARONGO-I	28	3075.3	86108.4	Hydropower	ROR	NA	NA	NA	NA	NA	22807.3	22807.3	29.6325	-1.8528	ROR
42037	RWANDA	NYAMYOTSI-1	0.075	3075.3	230.648	Hydropower	ROR	NA	NA	NA	NA	NA	0	0	29.6151	-1.63865	ROR
42038	RWANDA	NYAMYOTSI-2	0.1	3075.3	307.53	Hydropower	ROR	NA	NA	NA	NA	NA	0	0	29.6037	-1.6326	ROR. https://prommpt.com/wp-content/uploads/2020/02/Rwanda-hydro.pdf
42039	RWANDA	NYARUGURU	0.45	3075.3	1383.89	Hydropower	ROR	NA	NA	NA	NA	NA	0	0	30.1398	-2.009	ROR. https://content.frigg.eco/assets/technical-feasibility-study.pdf
42040	RWANDA	NYIRABUHOMBOHONBO	0.65	3075.3	1998.95	Hydropower	ROR	NA	NA	NA	NA	NA	0	0	29.1293	-2.33915	ROR. https://www.reg.rw/what-we-do/generation/power-plant/. https://hpi.lk/projects/hydropower-projects-in-rwanda-on-the-invitation-of-mininfra/
42041	RWANDA	NYIRANTARUKO	1.84	3075.3	5658.55	Hydropower	ROR	NA	NA	NA	NA	NA	8585.08	8585.08	29.2391	-2.39133	ROR. Operational in 2020. https://www.reg.rw/what-we-do/generation/power-plant/
42042	RWANDA	PFUNDA (KEYA)	2.2	3075.3	6765.66	Hydropower	ROR	NA	NA	NA	NA	NA	345.566	345.566	29.3011	-1.7013	ROR
42043	RWANDA	PFUNDA TEA	2.2	3075.3	6765.66	Hydropower	ROR	NA	NA	NA	NA	NA	583.038	583.038	29.3194	-1.70049	ROR. https://enclosuretakerefuge.com/tag/pfunda-tea-company/
42044	RWANDA	RUBAGABAGA	0.45	3075.3	1383.89	Hydropower	ROR	NA	NA	NA	NA	NA	0	0	29.8739	-1.94028	ROR. Operational in 2020. https://www.eastafricanpower.com/projet-1
42045	RWANDA	RUGEZI	2.2	3075.3	6765.66	Hydropower	ROR	NA	NA	NA	NA	NA	12685.1	12685.1	29.7501	-1.41866	ROR
42046	RWANDA	RUHWA	0.2	3075.3	615.06	Hydropower	ROR	NA	NA	NA	NA	NA	0	0	28.9075	-2.4846	ROR
42047	RWANDA	RUKARARA-I	9	3075.3	27677.7	Hydropower	ROR	NA	NA	NA	NA	NA	48532.1	48532.1	29.5946	-2.4691	ROR
42048	RWANDA	RUKARARA-II	2.2	3075.3	6765.66	Hydropower	ROR	NA	NA	NA	NA	NA	380630	380630	29.5775	-2.47063	ROR. https://www.reg.rw/what-we-do/generation/power-plant/
42049	RWANDA	RUNYOMBYI	0.162	3075.3	498.199	Hydropower	ROR	NA	NA	NA	NA	NA	0	0	29.5344	-2.77869	ROR
42050	RWANDA	RWAMAGANA SOLAR POWER STATION	8.5	4545	38632.5	Sun	PV	Land	No cooling	NA	Flat	Aw - Tropical Savannah	3802.24	2661.57	30.3772	-2.02611	Forest. Operational in 2015. https://en.wikipedia.org/wiki/Rwamagana_Solar_Power_Station
42051	RWANDA	RWAZA-MUKO	2.6	3075.3	7995.78	Hydropower	ROR	NA	NA	NA	NA	NA	16402.4	16402.4	29.6959	-1.54125	ROR.Operational in 2018. https://www.reg.rw/what-we-do/generation/power-plant/
43001	SAO TOME & PRINCIPE	MICONDO	0.024	1003	24.072	Oil	ICE	Diesel-Engines	Dry cooling	Air	Diesel	NA	7.79932	5.45953	6.66667	0.166667	By its size and fuel I assume it is an ICE with diesel
43002	SAO TOME & PRINCIPE	PRINCIPE	0.664	1003	665.992	Oil	ICE	Diesel-Engines	Dry cooling	Air	Diesel	NA	215.781	151.047	7.41783	1.63725	By the size and fuel, it must be a small MCI generator
43003	SAO TOME & PRINCIPE	RIO CONTADOR	2.2	2565.2	5643.44	Hydropower	ROR	NA	NA	NA	NA	NA	284860	284860	6.72732	0.33654	ROR. https://www.africa-energy.com/live-data/article/sao-tome-and-principe-bids-requested-10m-hydro-plant
43004	SAO TOME & PRINCIPE	ROCA BOMBAIN	3.8	2565.2	9747.76	Hydropower	ROR	NA	NA	NA	NA	NA	12755.1	12755.1	6.63221	0.245582	ROR
43005	SAO TOME & PRINCIPE	S JOAO ANGOLARES	0.12	1003	120.36	Oil	ICE	Diesel-Engines	Dry cooling	Air	Diesel	NA	38.9966	27.2976	6.64656	0.133027	By the size and fuel, it must be a small MCI generator
43006	SAO TOME & PRINCIPE	SANTO AMARO	22	1003	22066	Oil	ICE	Diesel-Engines	Dry cooling	Air	Diesel	NA	7149.38	5004.56	6.69443	0.36994	Cooling racks for diesel engines. https://grupel.eu/en/project/power-plant-santo-amaro-sao-tome-and-principe/ Nowadays there is also a small PV field
43007	SAO TOME & PRINCIPE	SAO TOME	8.27	1003	8294.81	Oil	ICE	Diesel-Engines	Dry cooling	Air	Diesel	NA	2687.52	1881.26	6.75074	0.292889	Diesel engines inside a building
44001	SENEGAL	BAKEL	0.921	3795.45	3495.61	Oil	ICE	Diesel-Engines	Dry cooling	Air	Diesel	NA	1132.58	792.804	-12.4594	14.9024	By the size and fuel, it must be a small MCI generator
44002	SENEGAL	BANDAFASSI	0.025	3795.45	94.8863	Oil	ICE	Diesel-Engines	Dry cooling	Air	Diesel	NA	30.7431	21.5202	-12.3106	12.5388	By its size and fuel I assume it is an ICE with diesel
44003	SENEGAL	BASSOUL BASSAR	0.965	3795.45	3662.61	Oil	ICE	Diesel-Engines	Dry cooling	Air	Diesel	NA	1186.68	830.679	-16.6077	13.9191	By the size and fuel, it must be a small MCI generator
44004	SENEGAL	BEL-AIR	66.85	3795.45	253726	Oil	ICE	Diesel-Engines	Dry cooling	Air	HFO	NA	82207.1	57545	-17.4346	14.6904	Diesel engines, https://fr.wikipedia.org/wiki/Liste_des_centrales_%C3%A9lectriques_au_S%C3%A9n%C3%A9gal
44005	SENEGAL	BEL-AIR C6	66.85	3795.45	253726	Oil	ICE	Diesel-Engines	Dry cooling	Air	HFO	NA	82207.1	57545	-17.4342	14.6907	Diesel engines, likely with HFO
44006	SENEGAL	BETTENTY	0.128	3795.45	485.818	Oil	ICE	Diesel-Engines	Dry cooling	Air	Diesel	NA	157.405	110.183	-16.6307	13.6899	By the size and fuel, it must be a small MCI generator
44007	SENEGAL	BOUTOUTE	26.77	3795.45	101604	Oil	ICE	Diesel-Engines	Dry cooling	Air	Diesel	NA	32919.7	23043.8	-16.2243	12.5596	Racks of fans. https://www.openstreetmap.org/way/253775706#map=10/12.4914/-16.1059
44008	SENEGAL	CAP DES BICHES C1	53.01	3795.45	201197	Oil	ICE	Diesel-Engines	Dry cooling	Air	Diesel	NA	65187.7	45631.4	-17.2983	14.7205	Part of the Cap des Biches Complex. Possibly updated and double counted with C3. https://www.contourglobal.com/asset/cap-des-biches
44009	SENEGAL	CAP DES BICHES C2	34	3795.45	129045	Oil	Brayton	Gas Turbine	No cooling	Air	Diesel	NA	207608	166086	-17.2983	14.7205	Part of the Cap des Biches Complex. Part of the combined Cycle. One brayton cycle (661) possibly with Diesel and one Heat Recovery (662) with wet towers.
44010	SENEGAL	CAP DES BICHES C2 HR	15	4814.3	72214.5	waste heat	Rankine	Steam Turbine	Wet tower	Freshwater	Heat recovery	BSh - Arid Steppe - Hot	207755	73807.6	-17.2983	14.7205	Part of the Cap des Biches Complex. Part of the combined Cycle. One brayton cycle (661) possibly with Diesel and one Heat Recovery (662) with wet towers.
44011	SENEGAL	CAP DES BICHES C3	86	3645	313470	NG	Rankine	Steam Turbine	Once through	Saline	Natural Gas, HFO	NA	11866.1	7899.44	-17.2983	14.7205	Part of the Cap des Biches Complex. Possibly updated and double counted with C3. https://www.contourglobal.com/asset/cap-des-biches
44012	SENEGAL	CAP DES BICHES C4 (AGGREKO)	57.5	3795.45	218238	Oil	ICE	Diesel-Engines	Dry cooling	Air	Diesel	NA	70709.2	49496.4	-17.2983	14.7205	Part of the Cap des Biches Complex.
44013	SENEGAL	CENTRE CONF DIAMNIADIO	2	542	1084	Sun	PV	Land	No cooling	NA	Flat	BSh - Arid Steppe - Hot	106.688	74.6816	-17.1941	14.7436	Semi-arid.
44014	SENEGAL	CSS SUGAR	25	4040	101000	Biomass	Rankine	Steam Turbine	No cooling	NA	Sugarcane	NA	16385.4	11469.8	-15.7136	16.4691	No cooling. CHP. //efaidnbmnnnibpcajpcglclefindmkaj/https://cdm.unfccc.int/UserManagement/FileStorage/J7R5G0EMOC8PFNTZ1Y4K3W29HISBUQ
44015	SENEGAL	DABO	0.1	3795.45	379.545	Oil	ICE	Diesel-Engines	Dry cooling	Air	Diesel	NA	122.972	86.0807	-14.4833	12.8833	By the size and fuel, it must be a small MCI generator
44016	SENEGAL	DAGANA SENEGAL	0.49	3795.45	1859.77	Oil	ICE	Diesel-Engines	Dry cooling	Air	Diesel	NA	602.565	421.796	-15.6	16.4767	By the size and fuel, it must be a small MCI generator
44017	SENEGAL	DAHRA	0.331	3795.45	1256.29	Oil	ICE	Diesel-Engines	Dry cooling	Air	Diesel	NA	407.039	284.927	-15.4833	15.35	By the size and fuel, it must be a small MCI generator
44018	SENEGAL	DAKAR PLANT	2.7	3795.45	10247.7	Oil	ICE	Diesel-Engines	Dry cooling	Air	Diesel	NA	3320.26	2324.18	-17.4441	14.6937	By its size and fuel I assume it is an ICE with diesel
44019	SENEGAL	DAROU KHOUDOSS ACID PLANT	30	4814	144420	Coal	Rankine	Steam Turbine	Wet tower	Freshwater	Pulverized Coal - Subcritical	BSh - Arid Steppe - Hot	656027	601358	-16.8463	15.0957	Cooling towers. Joined to the other plant (827) There is no information regarding the type of fuel. By its size and location we assume pulverized coal - subcritical
44020	SENEGAL	DIACK	1.99	3795.45	7552.95	Oil	ICE	Diesel-Engines	Dry cooling	Air	Diesel	NA	2447.15	1713.01	-16.7167	14.6833	By its size and fuel I assume it is an ICE with diesel
44021	SENEGAL	DIAMACOUTA	0.09	3795.45	341.59	Oil	ICE	Diesel-Engines	Dry cooling	Air	Diesel	NA	110.675	77.4727	-15.63	13.3155	By the size and fuel, it must be a small MCI generator
44022	SENEGAL	DIAOULE	0.022	3795.45	83.4999	Oil	ICE	Diesel-Engines	Dry cooling	Air	Diesel	NA	27.0539	18.9378	-16.2223	14.3748	By its size and fuel I assume it is an ICE with diesel
44023	SENEGAL	DIONEWAR NIODIOR	0.35	3795.45	1328.41	Oil	ICE	Diesel-Engines	Dry cooling	Air	Diesel	NA	430.404	301.283	-16.7303	13.8875	By the size and fuel, it must be a small MCI generator
44024	SENEGAL	DIOULOULOU	0.123	3795.45	466.84	Oil	ICE	Diesel-Engines	Dry cooling	Air	Diesel	NA	151.256	105.879	-16.6	13.05	By the size and fuel, it must be a small MCI generator
44025	SENEGAL	DIOURBEL PLANT	4.3	3795.45	16320.4	Oil	ICE	Diesel-Engines	Dry cooling	Air	Diesel	NA	5287.82	3701.47	-16.2304	14.6606	By its size and purpose I assume it is an diesel generator
44026	SENEGAL	DJIRNDA	0.11	3795.45	417.499	Oil	ICE	Diesel-Engines	Dry cooling	Air	Diesel	NA	135.27	94.6888	-16.6083	13.9788	By the size and fuel, it must be a small MCI generator
44027	SENEGAL	FONGOLIMBY	0.05	3795.45	189.773	Oil	ICE	Diesel-Engines	Dry cooling	Air	Diesel	NA	61.4862	43.0404	-12.0062	12.4245	By the size and fuel, it must be a small MCI generator
44028	SENEGAL	GALLEN CEMENT	30	4814	144420	Coal	Rankine	Steam Turbine	Wet tower	Freshwater	Pulverized Coal - Subcritical	BSh - Arid Steppe - Hot	656027	601358	-17.0397	14.7962	Cooling towers. Subcritical. https://www.gem.wiki/Gallen_Cement_power_station
44029	SENEGAL	GOUDIRY	0.75	3795.45	2846.59	Oil	ICE	Diesel-Engines	Dry cooling	Air	Diesel	NA	922.294	645.606	-12.718	14.1815	By the size and fuel, it must be a small MCI generator
44030	SENEGAL	KAHONE	102	3795.45	387136	Oil	ICE	Diesel-Engines	Dry cooling	Air	HFO	NA	125432	87802.4	-16.0332	14.1675	Rack of fans for the diesel engines. https://www.wartsila.com/media/news/27-09-2011-wartsila-to-expand-two-power-plants-in-senegal
44031	SENEGAL	KAHONE	21.3	542	11544.6	Sun	PV	Land	No cooling	NA	Flat	BSh - Arid Steppe - Hot	1136.23	795.359	-16.0248	14.1696	Desert. Operational in 2018. https://www.power-technology.com/data-insights/power-plant-profile-kahone-solar-pv-park-senegal/
44032	SENEGAL	KAHONE AGGREKO	5.4	3795.45	20495.4	Oil	ICE	Diesel-Engines	Dry cooling	Air	Diesel	NA	6640.51	4648.36	-16.032	14.1656	Smaller group of diesel engines in the Kahone Complex
44033	SENEGAL	KEDOUGOU	2.5	3795.45	9488.62	Oil	ICE	Diesel-Engines	Dry cooling	Air	Diesel	NA	3074.31	2152.02	-12.1682	12.5516	By its size and fuel I assume it is an ICE with diesel
44034	SENEGAL	KIRENE CEMENT PLANT	50	3795.45	189772	Oil	ICE	Diesel-Engines	Dry cooling	Air	Diesel	NA	61486.2	43040.4	-17.0156	14.6646	Diesel engines for the cement plant
44035	SENEGAL	KOLDA	4	3795.45	15181.8	Oil	ICE	Diesel-Engines	Dry cooling	Air	Diesel	NA	4918.9	3443.23	-14.95	12.8833	Diesel generator for the Hospital.
44036	SENEGAL	KOUMPETOUM	0.75	3795.45	2846.59	Oil	ICE	Diesel-Engines	Dry cooling	Air	Diesel	NA	922.294	645.606	-14.5667	13.9833	By the size and fuel, it must be a small MCI generator
44037	SENEGAL	KOUNGHEUL	1.3	3795.45	4934.09	Oil	ICE	Diesel-Engines	Dry cooling	Air	Diesel	NA	1598.64	1119.05	-14.8022	13.9798	By the size and fuel, it must be a small MCI generator
44038	SENEGAL	KOUNOUNE-I	67.5	3795.45	256193	Oil	ICE	Diesel-Engines	Dry cooling	Air	HFO	NA	83006.4	58104.5	-17.2664	14.7436	Diesel engines, likely with HFO
44039	SENEGAL	LINGUERE	0.61	3795.45	2315.22	Oil	ICE	Diesel-Engines	Dry cooling	Air	Diesel	NA	750.132	525.092	-15.1193	15.3953	By the size and fuel, it must be a small MCI generator
44040	SENEGAL	MARSASSOUM	0.33	3795.45	1252.5	Oil	ICE	Diesel-Engines	Dry cooling	Air	Diesel	NA	405.809	284.066	-15.9806	12.8275	By the size and fuel, it must be a small MCI generator
44041	SENEGAL	MEDINA GOUNASS	0.8	3795.45	3036.36	Oil	ICE	Diesel-Engines	Dry cooling	Air	Diesel	NA	983.78	688.646	-13.7574	13.135	By the size and fuel, it must be a small MCI generator
44042	SENEGAL	MEDINA SABAKH	0.8	3795.45	3036.36	Oil	ICE	Diesel-Engines	Dry cooling	Air	Diesel	NA	983.78	688.646	-15.5833	13.6	By the size and fuel, it must be a small MCI generator
44043	SENEGAL	MEDINA YOROFOULA	0.09	3795.45	341.59	Oil	ICE	Diesel-Engines	Dry cooling	Air	Diesel	NA	110.675	77.4727	-14.7146	13.2917	By the size and fuel, it must be a small MCI generator
44044	SENEGAL	N'DIOUM	0.555	3795.45	2106.47	Oil	ICE	Diesel-Engines	Dry cooling	Air	Diesel	NA	682.497	477.748	-14.6465	16.516	By the size and fuel, it must be a small MCI generator
44045	SENEGAL	NDJEBEL	0.015	3795.45	56.9317	Oil	ICE	Diesel-Engines	Dry cooling	Air	Diesel	NA	18.4459	12.9121	-16.1667	14.35	By its size and fuel I assume it is an ICE with diesel
44046	SENEGAL	N'DOLLOR CLINIC	0.004	542	2.168	Sun	PV	Rooftop	No cooling	NA	Flat	BSh - Arid Steppe - Hot	0.0303651	0.0212555	-16.7932	14.4343	City. I cannot see it, but for its size I assume is rooftop
44047	SENEGAL	N'GANDA	0.5	3795.45	1897.72	Oil	ICE	Diesel-Engines	Dry cooling	Air	Diesel	NA	614.862	430.404	-15.4059	13.8298	By the size and fuel, it must be a small MCI generator
44048	SENEGAL	OUROSSOGUI	1.093	3795.45	4148.43	Oil	ICE	Diesel-Engines	Dry cooling	Air	Diesel	NA	1344.09	940.862	-13.3167	15.6	By the size and fuel, it must be a small MCI generator
44049	SENEGAL	PAKOUR	0.07	3795.45	265.682	Oil	ICE	Diesel-Engines	Dry cooling	Air	Diesel	NA	86.0807	60.2565	-13.9667	12.75	By the size and fuel, it must be a small MCI generator
44050	SENEGAL	PODOR	0.34	3795.45	1290.45	Oil	ICE	Diesel-Engines	Dry cooling	Air	Diesel	NA	418.106	292.675	-15.0414	16.6178	By the size and fuel, it must be a small MCI generator
44051	SENEGAL	RICHARD TOLL	0.511	3795.45	1939.47	Oil	ICE	Diesel-Engines	Dry cooling	Air	Diesel	NA	628.389	439.873	-15.7008	16.4625	By the size and fuel, it must be a small MCI generator
44052	SENEGAL	SABODALA GOLD MINE	36	3795.45	136636	Oil	ICE	Diesel-Engines	Dry cooling	Air	Diesel	NA	44270.1	30989.1	-12.1219	13.1983	Rack of fans, air cooling for the gold mine
44053	SENEGAL	SAINT-LOUIS	6.5	3795.45	24670.4	Oil	ICE	Diesel-Engines	Dry cooling	Air	Diesel	NA	7993.21	5595.25	-16.5	16.0333	I cannot find it, but likely a group of diesel engines for the Saint-Louis port city
44054	SENEGAL	SAINT-LOUIS Bokhol solar park	20	542	10840	Sun	PV	Land	No cooling	NA	Flat	BWh - Desert Hot	1066.88	746.816	-15.4692	16.5172	Desert. https://www.power-technology.com/data-insights/power-plant-profile-bokhol-solar-pv-park-senegal/
44055	SENEGAL	SAKAL	20	542	10840	Sun	PV	Land	No cooling	NA	Flat	BWh - Desert Hot	1066.88	746.816	-16.2245	15.8567	Semi-arid. Operational in 2018. https://aera-group.fr/project/support-senegals-first-solar-power-station-on-trackers/
44056	SENEGAL	SALEMATA	0.025	3795.45	94.8863	Oil	ICE	Diesel-Engines	Dry cooling	Air	Diesel	NA	30.7431	21.5202	-12.8195	12.631	By its size and fuel I assume it is an ICE with diesel
44057	SENEGAL	SANTHIOU-MEKHE	30	542	16260	Sun	PV	Land	No cooling	NA	Flat	BSh - Arid Steppe - Hot	1600.32	1120.22	-16.6762	15.1302	Semi-arid. https://www.gem.wiki/Santhiou_M%C3%A9kh%C3%A9_solar_farm
44058	SENEGAL	SARAYA SENELEC	0.105	3795.45	398.522	Oil	ICE	Diesel-Engines	Dry cooling	Air	Diesel	NA	129.121	90.3848	-11.7539	12.839	By the size and fuel, it must be a small MCI generator
44059	SENEGAL	SEDHIOU	0.947	3795.45	3594.29	Oil	ICE	Diesel-Engines	Dry cooling	Air	Diesel	NA	1164.55	815.185	-15.5528	12.7124	By the size and fuel, it must be a small MCI generator
44060	SENEGAL	SINDIAN	0.14	3795.45	531.363	Oil	ICE	Diesel-Engines	Dry cooling	Air	Diesel	NA	172.161	120.513	-16.1814	12.9672	By the size and fuel, it must be a small MCI generator
44061	SENEGAL	SOCOCIM CEMENT PLANT	24	3795.45	91090.8	Oil	ICE	Diesel-Engines	Dry cooling	Air	Diesel	NA	29513.4	20659.4	-17.2446	14.7145	Diesel engines using dry cooling (rack of fans) for the Cement plant
44062	SENEGAL	TAIBA NDIAYE	55.2	2520	139104	Wind	Wind turbine	Onshore	No cooling	NA	NA	NA	0.0184298	0.0184298	-16.8594	15.0101	Operational in 2020. https://en.wikipedia.org/wiki/Taiba_N%27Diaye_Wind_Power_Station https://www.gem.wiki/Taiba_N%E2%80%99Diaye_wind_farm
44063	SENEGAL	TAMBACOUNDA	13.87	3795.45	52642.9	Oil	ICE	Diesel-Engines	Dry cooling	Air	Diesel	NA	17056.3	11939.4	-13.6831	13.7771	Diesel engines, both movable and stationary on the site. https://openinframap.org/stats/area/Senegal/plants/584910335
44064	SENEGAL	TEN MERENA	30	542	16260	Sun	PV	Land	No cooling	NA	Flat	BSh - Arid Steppe - Hot	1600.32	1120.22	-16.5955	15.1551	Semi-arid. Operational in 2018. https://www.meridiam.com/projects/ten-merina-solar-plant-senegal/
44065	SENEGAL	THIONK ESSYL	0.078	3795.45	296.045	Oil	ICE	Diesel-Engines	Dry cooling	Air	Diesel	NA	95.9185	67.143	-16.5069	12.7915	By the size and fuel, it must be a small MCI generator
44066	SENEGAL	TOBENE (Taiba Ndiaye)	111	3795.45	421295	Oil	ICE	Diesel-Engines	Dry cooling	Air	HFO	NA	136499	95549.6	-16.8617	15.0074	Combined cycle: MCI of six HFO engines (111 MW - 3328) and one Steam Turbine (7.2 MW - 3329). Operational in 2016. https://www.gem.wiki/Tob%C3%A8ne_power_station. https://tobenepower.com/faqs/ It says it plans to switch to gas since 2015, but they will do when there is availability of that fuel
44067	SENEGAL	TOBENE (Taiba Ndiaye)	7.2	4814.3	34663	waste heat	Rankine	Steam Turbine	Dry cooling	Air	Heat recovery	NA	1312.14	918.495	-16.8619	15.0077	Combined cycle: MCI of six HFO engines (111 MW - 3328) and one Steam Turbine (7.2 MW - 3329). Operational in 2016. https://www.gem.wiki/Tob%C3%A8ne_power_station. https://tobenepower.com/faqs/ It says it plans to switch to gas since 2015, but they will do when there is availability of that fuel
44068	SENEGAL	VELINGARA	3.15	3795.45	11955.7	Oil	ICE	Diesel-Engines	Dry cooling	Air	Diesel	NA	3873.63	2711.54	-12.9646	14.2381	By its size and purpose I assume it is an diesel generator
45001	SEYCHELLES	BAIE STE ANNE	11.35	3254.79	36941.9	Oil	ICE	Diesel-Engines	Dry cooling	Air	Diesel	NA	11969.2	8378.41	55.7563	-4.33958	Diesel engines near the coast
45002	SEYCHELLES	ILE DU PORT	2.25	1333.3	2999.92	Wind	Wind turbine	Onshore	No cooling	NA	NA	NA	0.000397458	0.000397458	69.6001	-49.1759	Wind farm
45003	SEYCHELLES	ROCHE CAIMAN	58	3254.79	188778	Oil	ICE	Diesel-Engines	Dry cooling	Air	Diesel	NA	61164	42814.8	55.4666	-4.63277	Diesel engines near the coast
45004	SEYCHELLES	ROMAINVILLE WIND	6	1333.3	7999.8	Wind	Wind turbine	Onshore	No cooling	NA	NA	NA	0.00105989	0.00105989	55.492	-4.67957	http://www.seychellesnewsagency.com/articles/914/After++year+of+wind+power+in+Seychelles+islands%2C+turbines+producing+desired+output
45005	SEYCHELLES	VICTORIA PUC	78.723	3254.79	256227	Oil	ICE	Diesel-Engines	Dry cooling	Air	Diesel	NA	83017.4	58112.2	55.4615	-4.62826	Diesel engines near the coast
46001	SIERRA LEONE	BANKASOKA	3	3905.86	11717.6	Hydropower	ROR	NA	NA	NA	NA	NA	78165.8	78165.8	-12.7854	8.76869	ROR. https://en.wikipedia.org/wiki/List_of_power_stations_in_Sierra_Leone
46002	SIERRA LEONE	BLACKHALL ROAD IEL	10	466.59	4665.9	Oil	ICE	Diesel-Engines	Dry cooling	Air	Diesel	NA	1511.75	1058.23	-13.211	8.47918	Old power plant with diesel generators. //efaidnbmnnnibpcajpcglclefindmkaj/https://www.eib.org/attachments/pipeline/20090712_esia_en.pdf
46003	SIERRA LEONE	BLACKHALL ROAD NEW (Edsa)	15	466.59	6998.85	Oil	ICE	Diesel-Engines	Dry cooling	Air	Diesel	NA	2267.63	1587.34	-13.2299	8.484	Coast. Edsa power station. Two units
46004	SIERRA LEONE	BO	5.28	466.59	2463.6	Oil	ICE	Diesel-Engines	Dry cooling	Air	Diesel	NA	798.204	558.743	-11.7383	7.96472	By its size and purpose I assume it is an diesel generator
46005	SIERRA LEONE	BONTHE WORKS	23	466.59	10731.6	Oil	ICE	Diesel-Engines	Dry cooling	Air	Diesel	NA	3477.03	2433.92	-12.2938	7.76519	Diesel engines with a Rack of Fans for the Rutile plant
46006	SIERRA LEONE	BUMBUNA-I	50	3905.86	195293	Hydropower	Dammed	NA	NA	NA	NA	NA	8.5178e+06	8.5178e+06	-11.7336	9.05362	Reservoir
46007	SIERRA LEONE	CHARLOTTE DAM	2.2	3905.86	8592.9	Hydropower	Dammed	NA	NA	NA	NA	NA	6.76095e+06	6.76095e+06	-11.7799	8.46055	https://en.wikipedia.org/wiki/List_of_power_stations_in_Sierra_Leone
46008	SIERRA LEONE	DODO DAM	6	3905.86	23435.2	Hydropower	ROR	NA	NA	NA	NA	NA	41767.9	41767.9	-12.5837	7.98355	ROR. https://en.wikipedia.org/wiki/List_of_power_stations_in_Sierra_Leone
46009	SIERRA LEONE	GUMA DAM	6	3905.86	23435.2	Hydropower	Dammed	NA	NA	NA	NA	NA	1.9972e+06	1.9972e+06	-11.1875	7.87667	Reservoir
46010	SIERRA LEONE	KENEMA	1	466.59	466.59	Oil	ICE	Diesel-Engines	Dry cooling	Air	Diesel	NA	151.175	105.823	-11.1875	7.87667	By the size and fuel, it must be a small MCI generator
46011	SIERRA LEONE	KINGTOM	33.8	466.59	15770.7	Oil	ICE	Diesel-Engines	Dry cooling	Air	Diesel	NA	5109.72	3576.8	-13.2474	8.49263	Diesel engines with a Rack of Fans
46012	SIERRA LEONE	KINGTOM JICA	20	466.59	9331.8	Oil	Rankine	Steam Turbine	Once through	Saline	HFO	NA	1513.92	1007.83	-13.2317	8.46568	Power barge in the port of Kingtom
46013	SIERRA LEONE	KOIDU	8.5	466.59	3966.01	Oil	ICE	Diesel-Engines	Dry cooling	Air	Diesel	NA	1284.99	899.491	-10.8333	8.41667	By its size and purpose I assume it is an diesel generator
46014	SIERRA LEONE	KOIDU KIMBERLITE	9	466.59	4199.31	Oil	ICE	Diesel-Engines	Dry cooling	Air	Diesel	NA	1360.58	952.403	-10.9655	8.6281	By its size and purpose I assume it is an diesel generator for the Diamond Mine
46015	SIERRA LEONE	LUNGI	6	466.59	2799.54	Oil	ICE	Diesel-Engines	Dry cooling	Air	Diesel	NA	907.05	634.935	-13.2231	8.64586	I cannot find it, likely a group of diesel engines for the village
46016	SIERRA LEONE	MAGBASS SUGAR	1.4	115	161	Biomass	Rankine	Steam Turbine	No cooling	NA	Sugarcane	NA	26.1193	18.2835	-11.798	8.73894	I cannot find it, but for its size and fuel it does not have cooling
46017	SIERRA LEONE	MAKALI DAM	0.12	3905.86	468.703	Hydropower	ROR	NA	NA	NA	NA	NA	0	0	-11.798	8.73894	ROR (very small)
46018	SIERRA LEONE	MAKENI	1.28	466.59	597.235	Oil	ICE	Diesel-Engines	Dry cooling	Air	Diesel	NA	193.504	135.453	-12.05	8.88333	By the size and fuel, it must be a small MCI generator
46019	SIERRA LEONE	MAKENI ETHANOL	32	115	3680	Biomass	Rankine	Steam Turbine	Wet Tower	Freshwater	Sugarcane	Am - Tropical Monsoon	16716.4	15323.3	-12.2359	8.7123	Cooling towers, river nearby. https://www.gem.wiki/Makeni_Bioethanol_Plant_power_station
46020	SIERRA LEONE	MARAMPA MINE NEW	17	466.59	7932.03	Oil	ICE	Diesel-Engines	Dry cooling	Air	Diesel	NA	2569.98	1798.98	-12.5016	8.67817	Group of movable Diesel generators. https://www.africa-energy.com/news-centre/article/sierra-leone-marampa-mine-commission-22mw-plant
46021	SIERRA LEONE	MOYAMBA	0.26	466.59	121.313	Oil	ICE	Diesel-Engines	Dry cooling	Air	Diesel	NA	39.3055	27.5139	-12.4333	8.16667	By the size and fuel, it must be a small MCI generator
46022	SIERRA LEONE	PORT LOKO HYDRO	2	3905.86	7811.72	Hydropower	ROR	NA	NA	NA	NA	NA	7666.74	7666.74	-12.7854	8.76869	ROR
46023	SIERRA LEONE	PUJEHUN	0.18	466.59	83.9862	Oil	ICE	Diesel-Engines	Dry cooling	Air	Diesel	NA	27.2115	19.0481	-11.7181	7.35056	By the size and fuel, it must be a small MCI generator
46024	SIERRA LEONE	YELE DAM	0.25	3905.86	976.465	Hydropower	ROR	NA	NA	NA	NA	NA	0	0	-11.84	8.40823	ROR. https://en.wikipedia.org/wiki/List_of_power_stations_in_Sierra_Leone
47001	SOMALIA	BERBERA	0.9	4375	3937.5	Oil	ICE	Diesel-Engines	Dry cooling	Air	Diesel	NA	1275.75	893.024	45.0143	10.4396	By the size and fuel, it must be a small MCI generator
47002	SOMALIA	BOSSASO	1.8	4375	7875	Oil	ICE	Diesel-Engines	Dry cooling	Air	Diesel	NA	2551.5	1786.05	49.1816	11.2842	By its size and fuel I assume it is an ICE with diesel
47003	SOMALIA	BURAO	6	4375	26250	Oil	ICE	Diesel-Engines	Dry cooling	Air	Diesel	NA	8504.99	5953.5	45.5336	9.50892	Probably diesel generator hospital
47004	SOMALIA	BURAO GENERAL HOSPITAL SOLAR PARK	1	1553	1553	Sun	PV	Rooftop	No cooling	NA	Flat	BWh - Desert Hot	21.7514	15.2259	45.5371	9.53404	City. Operational in 2020. https://reliefweb.int/report/somalia/harnessing-power-sun-bringing-solar-panels-somaliland
47005	SOMALIA	ENEE	0.36	1553	559.08	Sun	PV	Land	No cooling	NA	Flat	BWh - Desert Hot	55.025	38.5175	47.4199	6.80594	Desert. operational in 2020. https://nvisionenergy.com/
47006	SOMALIA	ENEE Bosaso	1.2	1553	1863.6	Sun	PV	Land	No cooling	NA	Flat	BWh - Desert Hot	183.417	128.392	49.1781	11.2611	Desert. operational in 2020. https://nvisionenergy.com/
47007	SOMALIA	GARDHO	0.28	4375	1225	Oil	ICE	Diesel-Engines	Dry cooling	Air	Diesel	NA	396.9	277.83	49.0849	9.50506	By the size and fuel, it must be a small MCI generator
47008	SOMALIA	GAROWE	0.91	4375	3981.25	Oil	ICE	Diesel-Engines	Dry cooling	Air	Diesel	NA	1289.92	902.947	48.4845	8.40536	By the size and fuel, it must be a small MCI generator
47009	SOMALIA	GAROWE wind	0.45	2318	1043.1	Wind	Wind turbine	Onshore	No cooling	NA	NA	NA	0.0001382	0.0001382	48.4837	8.40842	www.lifegate.com/somalia-garowe-solar-wind-hybrid-plant
47010	SOMALIA	HARGEISA	25	4375	109375	Oil	ICE	Diesel-Engines	Dry cooling	Air	Diesel	NA	35437.5	24806.2	44.0626	9.64728	Diesel engines next to the PV plant
47011	SOMALIA	QARDHO	0.3	1553	465.9	Sun	PV	Land	No cooling	NA	Flat	BWh - Desert Hot	45.8542	32.0979	49.0877	9.51236	Desert. https://www.facebook.com/EquatorEnergy/posts/and-this-300-kw-solar-power-plant-supplies-most-of-the-daytime-power-of-the-town/1296216784058138/
47012	SOMALIA	SHIRKADA SOM	8	1553	12424	Sun	PV	Land	No cooling	NA	Flat	BWh - Desert Hot	1222.78	855.945	44.063	9.64461	Semi-Arid
47013	SOMALIA	THORNE TREE LODGE SOLAR PARK	0.178	1553	276.434	Sun	PV	Rooftop	No cooling	NA	Flat	BSh - Arid Steppe - Hot	3.87174	2.71022	45.31	2.02222	City. https://www.afrik21.africa/en/somalia-beco-builds-8-mwp-solar-power-plant-in-mogadishu/
48001	SOUTH AFRICA	ABB LONGMEADOW	0.75	1537	1152.75	Sun	PV	Rooftop	No cooling	NA	Flat	Cwb - Temperate Dry Winter	4.36363	3.05454	28.1388	-26.1073	City.
48002	SOUTH AFRICA	ABSA TOWERS WEST	11.6	8017	92997.2	NG	ICE	Gas-Engines	Dry cooling	Air	Natural Gas	NA	30131.1	21091.7	28.049	-26.2063	Operational in 2011. Group of diesel generators running on natural gas for the building.
48003	SOUTH AFRICA	ACACIA	171	48	8208	Oil	Brayton	Gas Turbine	No cooling	NA	HFO	NA	13205	10564	18.5358	-33.8831	Gas turbines working with oil https://www.gem.wiki/Acacia_power_station
48004	SOUTH AFRICA	ADAMS (AURORA)	75	1537	115275	Sun	PV	Land	No cooling	NA	Flat	BSh - Arid Steppe - Hot	11345.4	7941.81	23.0131	-27.3657	Desert. Operational in 2017. https://www.gem.wiki/Adams_Aurora_solar_farm
48005	SOUTH AFRICA	AGGENEYS	46	1537	70702	Sun	PV	Land	No cooling	NA	Flat	BWh - Desert Hot	6958.54	4870.98	18.8995	-29.2374	Desert. Operational in 2020
48006	SOUTH AFRICA	AMAKHALA EMOYENI	134.4	2510.3	337384	Wind	Wind turbine	Onshore	No cooling	NA	NA	NA	0.0446999	0.0446999	25.9986	-32.8605	https://www.power-technology.com/projects/amakhala-emoyeni-wind-farm-bedford/ https://www.gem.wiki/Amakhala_Emoyeni_wind_farm
48007	SOUTH AFRICA	AMATIKULU MILL	12	1355	16260	Biomass	Rankine	Steam Turbine	Wet Tower	Freshwater	Sugarcane	Cfa - Temperate without Dry Season	40192.7	31390.9	31.5255	-29.0452	Sugar mill. Cooling Towers. Artificial reservoir nearby
48008	SOUTH AFRICA	ANKERLIG	1327	8017	10638559	NG	Brayton	Gas Turbine	No cooling	NA	Natural Gas, HFO	NA	1.71153e+07	1.36923e+07	18.4615	-33.5895	Air cooled. Brayton. //efaidnbmnnnibpcajpcglclefindmkaj/https://www.eskom.co.za/wp-content/uploads/2022/04/GS-0003-Ankerlig-Gourikwa-Technical-Brochure-Rev-9.pdf https://www.gem.wiki/Ankerlig_power_station
48009	SOUTH AFRICA	APEX BUILDING	0.2	1537	307.4	Sun	PV	Rooftop	No cooling	NA	Flat	Cwb - Temperate Dry Winter	1.16364	0.814545	28.0292	-26.1937	City.
48010	SOUTH AFRICA	AQUILA GAME RESERVE	0.06	1537	92.22	Sun	PV	Land	No cooling	NA	Flat	BWk - Arid Desert - Hot	9.07636	6.35345	19.936	-33.3503	Semi-arid.
48011	SOUTH AFRICA	ARIES SOLAR	10.752	1537	16525.8	Sun	PV	Land	No cooling	NA	Flat	BWk - Arid Desert - Hot	1626.48	1138.54	20.7852	-29.497	Desert. https://www.power-technology.com/data-insights/power-plant-profile-aries-solar-park-south-africa/
48012	SOUTH AFRICA	ARNOT	2352	5767	13563984	Coal	Rankine	Steam Turbine	Wet tower	Freshwater	Pulverized Coal - Subcritical	Cwb - Temperate Dry Winter	3.35285e+07	2.61861e+07	29.792	-25.9438	Natural flow Cooling towers. River nearby. https://www.gem.wiki/Arnot_power_station
48013	SOUTH AFRICA	AVON SHAKASKRAAL	670	48	32160	Oil	Brayton	Gas Turbine	No cooling	NA	Diesel	NA	51739	41391.2	31.155	-29.4183	Open cycle gas turbine. https://www.hydrocarbonengineering.com/gas-processing/25072016/avon-peaking-power-reaches-commercial-operation-2828/ It says that it plans to work with Natural Gas in the future. Surely works with Diesel https://www.gem.wiki/Avon_power_station
48014	SOUTH AFRICA	BAYER NIGEL	1.8	48	86.4	Oil	ICE	Diesel-Engines	Dry cooling	Air	Diesel	NA	27.9936	19.5955	28.4786	-26.4228	By its size and fuel I assume it is an ICE with diesel
48015	SOUTH AFRICA	BEATRIX MINE	12	5767	69204	Coal	Rankine	Steam Turbine	Wet tower	Freshwater	Pulverized Coal - Subcritical	BSk - Arid Steppe - Cold	314359	288162	26.7978	-28.2397	Cooling tower. Gold mine. https://www.goldfields.com/reports/rr_2009/tech_beatrix.php There is no information regarding the fuel, but by its size and location we assume subcritical
48016	SOUTH AFRICA	BELLVILLE SOLAR	0.19	1537	292.03	Sun	PV	Rooftop	No cooling	NA	Flat	Csb - Temperate Dry Summer	1.10545	0.773818	18.6294	-33.8943	City.
48017	SOUTH AFRICA	BISASAR ROAD LANDFILL	6.5	6000	39000	Biomass	ICE	Gas-Engines	Dry cooling	Air	Biogas - Landfill	NA	12636	8845.19	30.9795	-29.818	Seven MCI gas combustion engines. //efaidnbmnnnibpcajpcglclefindmkaj/https://www.cityenergy.org.za/uploads/resource_340.pdf
48018	SOUTH AFRICA	BIVANE	2.7	1216.1	3283.47	Hydropower	ROR	NA	NA	NA	NA	NA	98726.8	98726.8	30.7917	-27.7695	https://www.scielo.org.za/pdf/jesa/v24n3/03.pdf
48019	SOUTH AFRICA	BLACK RIVER PARK	1.2	1537	1844.4	Sun	PV	Rooftop	No cooling	NA	Flat	Csb - Temperate Dry Summer	6.98181	4.88727	18.4713	-33.9353	City
48020	SOUTH AFRICA	BOKPOORT-1	50	1537	76850	Sun	CSP	PT	Wet tower	Freshwater	NA	BWh - Desert Hot	789610	552727	21.9955	-28.7373	CSP. https://www.gem.wiki/Bokpoort_Concentrated_Solar_Project Wet tower
48021	SOUTH AFRICA	BOSHOFF SOLAR	66	1537	101442	Sun	PV	land	No cooling	NA	Flat	BSk - Arid Steppe - Cold	9983.99	6988.8	25.1891	-28.2628	Desert. https://www.gem.wiki/Boshof_Solar_Power_Plant
48022	SOUTH AFRICA	BRONKHORSTSPRUIT	4.4	1355	5962	Biomass	ICE	Gas-Engines	Dry cooling	Air	Biogas - Anaerobic Digester	NA	1931.69	1352.18	27.9926	-25.9485	Anaerobic Digester. Waste to methane for electricity. /efaidnbmnnnibpcajpcglclefindmkaj/https://www.norfund.no/content/uploads/2020/01/Bio2Watt-case-study.pdf
48023	SOUTH AFRICA	BUFFLESFONTEIN	17	5592	95064	waste heat	Rankine	Steam Turbine	Dry cooling	Air	Heat recovery	NA	3598.56	2518.99	26.6711	-26.9541	Gold and uranium mine. There is no need for cooling as the remanents will be used for the process
48024	SOUTH AFRICA	CAMDEN	1600	5767	9227200	Coal	Rankine	Steam Turbine	Wet tower	Freshwater	Pulverized Coal - Subcritical	Cwb - Temperate Dry Winter	2.28085e+07	1.78137e+07	30.0901	-26.6215	Natural Flow Cooling towers, freshwater nearby. https://www.gem.wiki/Camden_power_station
48025	SOUTH AFRICA	CAMPHILL VILLAGE	0.06	1537	92.22	Sun	PV	Rooftop	No cooling	NA	Flat	Csb - Temperate Dry Summer	0.349091	0.244363	18.5627	-33.5935	Forest.
48026	SOUTH AFRICA	CAPE TOWN HQ	0.086	1537	132.182	Sun	PV	Rooftop	No cooling	NA	Flat	Csb - Temperate Dry Summer	0.500363	0.350254	18.4232	-33.9258	City.
48027	SOUTH AFRICA	CAPE TOWN SOLAR	0.856	1537	1315.67	Sun	PV	Rooftop	No cooling	NA	Flat	Csb - Temperate Dry Summer	4.98036	3.48625	18.4241	-33.9249	City
48028	SOUTH AFRICA	CARELTONVILLE	48	48	2304	Oil	Rankine	Steam Turbine	Wet tower	Freshwater	HFO	Cwb - Temperate Dry Winter	5695.2	4448.01	27.3602	-26.4549	Cooling towers. Gold mine
48029	SOUTH AFRICA	CENTURY CITY	0.012	1537	18.444	Sun	PV	Rooftop	No cooling	NA	Flat	Csb - Temperate Dry Summer	0.0698181	0.0488727	18.5203	-33.8841	City. https://msolarpower.co.za/portfolio/solar-power-century-city-property-owners/
48030	SOUTH AFRICA	CERES RSA	1	1216.1	1216.1	Hydropower	ROR	NA	NA	NA	NA	NA	0	0	19.311	-33.3689	ROR
48031	SOUTH AFRICA	CHABA	21	2510.3	52716.3	Wind	Wind turbine	Onshore	No cooling	NA	NA	NA	0.00698435	0.00698435	27.9623	-32.5901	https://www.gem.wiki/Chaba_wind_farm
48032	SOUTH AFRICA	CLANWILLIAM DAM REBUILD	1.5	1216.1	1824.15	Hydropower	Dammed	NA	NA	NA	NA	NA	1.20063e+06	1.20063e+06	18.8922	-32.1817	Reservoir, mainly for irrigation. Hydropower not found.
48033	SOUTH AFRICA	CLEARWATER MALL	1.5	1537	2305.5	Sun	PV	Rooftop	No cooling	NA	Flat	Cwb - Temperate Dry Winter	8.72727	6.10909	27.9043	-26.1264	City.
48034	SOUTH AFRICA	COEGA HQ	0.19	1537	292.03	Sun	PV	Land	No cooling	NA	Flat	BSh - Arid Steppe - Hot	28.7418	20.1193	25.6672	-33.7952	Forest.
48035	SOUTH AFRICA	COLLY WOBBLES	42	1216.1	51076.2	Hydropower	ROR	NA	NA	NA	NA	NA	388222	388222	28.7666	-32.001	Reservoir and tunnel. https://en.wikipedia.org/wiki/Colley_Wobbles_Power_Station
48036	SOUTH AFRICA	COTTESLOE	50	48	2400	Oil	Brayton	Gas Turbine	No cooling	NA	HFO	NA	3861.12	3088.9	28.0217	-26.1875	One gas turbine https://www.openstreetmap.org/way/1092306133#map=18/-26.18790/28.02194
48037	SOUTH AFRICA	CSIR PRETORIA	0.558	1537	857.646	Sun	PV	Rooftop	No cooling	NA	Flat	Cwa - Temperate Dry Winter	3.24654	2.27258	28.2812	-25.7484	City.
48038	SOUTH AFRICA	DALTON MILL	4.5	1355	6097.5	Biomass	Rankine	Steam Turbine	Wet Tower	Freshwater	Sugarcane	Cwb - Temperate Dry Winter	15072.3	11771.6	30.6294	-29.3379	Sugar mill. Cooling Towers. Artificial reservoir nearby
48039	SOUTH AFRICA	DALTON MILL	0.16	48	7.68	Oil	ICE	Diesel-Engines	Dry cooling	Air	Diesel	NA	2.48832	1.74182	30.6312	-29.3409	By the size and fuel, it must be a small MCI generator
48040	SOUTH AFRICA	DARLING WIND FARM	5.2	2510.3	13053.6	Wind	Wind turbine	Onshore	No cooling	NA	NA	NA	0.00172946	0.00172946	18.3794	-33.3782	en.wikipedia.org/wiki/Darling_Wind_Farm
48041	SOUTH AFRICA	DARNALL MILL	13	1355	17615	Biomass	Rankine	Steam Turbine	Wet Tower	Freshwater	Sugarcane	Cfa - Temperate without Dry Season	43542.1	34006.8	31.3612	-29.2702	Sugar mill. Cooling Towers. Artificial reservoir nearby
48042	SOUTH AFRICA	DASSIESKLIP	54.4	2510.3	136560	Wind	Wind turbine	Onshore	No cooling	NA	NA	NA	0.0180928	0.0180928	19.383	-34.2275	https://www.power-technology.com/data-insights/power-plant-profile-dassiesklip-wind-energy-facility-south-africa/ https://www.gem.wiki/Dassieklip_wind_farm
48043	SOUTH AFRICA	DE AAR GLOBELEQ	50	1537	76850	Sun	PV	Land	No cooling	NA	Flat	BSk - Arid Steppe - Cold	7563.63	5294.54	24.0283	-30.6234	https://www.gem.wiki/De_Aar_(Globeleq)_solar_farm
48044	SOUTH AFRICA	DE AAR MULILO	10	1537	15370	Sun	PV	Land	No cooling	NA	Flat	BSk - Arid Steppe - Cold	1512.73	1058.91	24.0054	-30.628	De Aar complex.
48045	SOUTH AFRICA	DE AAR PROJECT-1	85	1537	130645	Sun	PV	land	No cooling	NA	Flat	BSk - Arid Steppe - Cold	12858.2	9000.72	24.1035	-30.5955	Desert. https://www.gem.wiki/De_Aar_-_Project_1_(Solar_Capital)_solar_farm
48046	SOUTH AFRICA	DE AAR-I (Mulilo, Maanhaarberg)	100.5	2510.3	252285	Wind	Wind turbine	Onshore	No cooling	NA	NA	NA	0.0334251	0.0334251	23.8699	-30.7239	Part of the Longyouan Mulilo De AAR Maanhaarberg plant. Operational in 2017. https://www.power-technology.com/data-insights/power-plant-profile-de-aar-wind-farm-south-africa/
48047	SOUTH AFRICA	DE AAR-II (Mulilo, Maanhaarberg)	144	2510.3	361483	Wind	Wind turbine	Onshore	No cooling	NA	NA	NA	0.0478927	0.0478927	23.8622	-30.7619	Part of the Longyouan Mulilo De AAR Maanhaarberg plant. Operational in 2017. https://www.power-technology.com/data-insights/power-plant-profile-de-aar-wind-farm-south-africa/
48048	SOUTH AFRICA	DEDISA	335	48	16080	Oil	Brayton	Gas Turbine	No cooling	NA	Diesel, Natural Gas	NA	25869.5	20695.6	25.6725	-33.743	Open cycle gas turbine. https://www.hydrocarbonengineering.com/gas-processing/25072016/avon-peaking-power-reaches-commercial-operation-2828/ https://www.gem.wiki/Dedisa_power_station
48049	SOUTH AFRICA	DENSA	0.5	1216.1	608.05	Hydropower	ROR	NA	NA	NA	NA	NA	0	0	31.0657	-25.3811	ROR (very small)
48050	SOUTH AFRICA	DGB WELLINGTON	0.8	1537	1229.6	Sun	PV	Rooftop	No cooling	NA	Flat	Csa - Temperate Dry Summer	4.65454	3.25818	18.9873	-33.6314	Agricultural Land. https://www.engineeringnews.co.za/article/winery-installs-800-kw-rooftop-solar-pv-plant-2016-04-12
48051	SOUTH AFRICA	DILOKONG CHROME	1	1537	1537	Sun	PV	Land	No cooling	NA	Flat	BSh - Arid Steppe - Hot	151.273	105.891	29.4179	-23.4013	Semi-arid. Cannot find it. Assume it is land and near the mine
48052	SOUTH AFRICA	DORPER	100	2510.3	251030	Wind	Wind turbine	Onshore	No cooling	NA	NA	NA	0.0332588	0.0332588	26.4393	-31.4809	https://www.gem.wiki/Dorper_wind_farm
48053	SOUTH AFRICA	DRAKENSBERG	1000	1216.1	1216100	Hydropower	Pump Storage	NA	NA	NA	NA	NA	5.49669e+07	5.49669e+07	29.0832	-28.566	Pumped storage with 2 reservoirs. https://en.wikipedia.org/wiki/Drakensberg_Pumped_Storage_Scheme
48054	SOUTH AFRICA	DREUNBERG SOLAR	75	1537	115275	Sun	PV	Land	No cooling	NA	Flat	BSk - Arid Steppe - Cold	11345.4	7941.81	26.2056	-30.8373	Desert
48055	SOUTH AFRICA	DROOGFONTEIN-1	50	1537	76850	Sun	PV	Land	No cooling	NA	Flat	BSk - Arid Steppe - Cold	7563.63	5294.54	24.7521	-28.612	Desert
[truncated: 536 more rows]

## Sheet: Hydro_OWS
ID_Number	Country	Plant	MW	GEN_TYPE	Degrees Coordinates	Operation	Infrastructure	Purpose	Allocation	OWS1	Area	OWS2	Area2	OWS3	Area3	Total Area	details
860	ALGERIA	DERGUINAH	71.5	Hydropower	36.5551424244053, 5.32898744859006	Dammed	Room downstream	Electricity	1	Reservoir	1.8774	-	0	-	0	1.8774	Small reservoir in the mountains called the Barrage Ighzer Ouftis. According to topography is not so elevated to produce this amount of electricity, but likely the maps are wrong. In pictures it seems that there is a recreational use of the reservoir, but I cannot find a suitable data for allocation.
1024	ALGERIA	ERRAGUENE	16	Hydropower	36.5852778, 5.5786111	Dammed	Room at the bottom	Electricity	1	Reservoir	571	-	0	-	0	571	I cannot see the power room, but according to data online it is at the bottom of the dam. https://www.power-technology.com/data-insights/power-plant-profile-erraguene-algeria/?cf-view https://fr.wikipedia.org/wiki/Barrage_d%27Erraguene https://www.openstreetmap.org/way/833562287#map=14/36.5880/5.5737
1240	ALGERIA	GOURIET	6.5	Hydropower	36.40992, 4.189353	ROR	Room downstream	Electricity	1	Weir	0.0397	Open Canal	0.0713	-	0	0.111	Small hydropower in the mountain
1281	ALGERIA	HAMIZ	2.2	Hydropower	36.605624, 3.351924	Dammed	Room downstream	Multipurpose	1	Reservoir	78	-	0	-	0	78	I cannot see the power room, but according to data online it is at the bottom of the dam. https://fr.wikipedia.org/wiki/Barrage_du_Hamiz . Indicates that is also for drinking water, but I do not see the water treatment plant either. Allocated everything to electricity.
1410	ALGERIA	IRHIL EMDA (Kherrata)	24	Hydropower	36.4556, 5.2722	Dammed	Room downstream	Electricity	1	Reservoir	306	-	0	-	0	306	It indicates that there are two hydropower plants using this reservoir, Darguinah and Irhil Emda (Kherrata). Kherrata looks like it is no producing electricity for lack of water https://fr.wikipedia.org/wiki/Barrage_d%27Ighil_Emda
2042	ALGERIA	MANSOURIA	100	Hydropower	36.5806, 5.575	Dammed	Room downstream	Electricity	1	Reservoir	0	-	0	-	0	0	Mansouria uses the water from Erraguene reservoir. http://jijelinfo.online.fr/IMG/article_PDF/article_23.pdf
2156	ALGERIA	MEFFROUCH	1.678	Hydropower	34.8494, -1.288705	Dammed	Room downstream	Electricity	1	Reservoir	40	-	0	-	0	40	Little information about this hydropower. I cannot see the power room, but it is relatively small turbine
3106	ALGERIA	SOUK EL DJEMAA (Imayras)	8.085	Hydropower	36.543213606092046, 4.2709205538465715	ROR	Room downstream	Electricity	1	Weir	0	-	0	-	0	0	I cannot find the water diversion, but according to very old pictures it is a ROR power plant near the Souk el Djemaa village. Asume the OWS is negligible. http://kent.cdha.fr/Record.htm?idlist=1&record=19217378124910355509 http://alger-roi.fr/Alger/barrages/pages/26_travaux_hydroelectriques_photo_3_6_1949_echo.htm
3569	ALGERIA	ZEBA'IR	7	Hydropower	36.1636885006466, 2.560532341205349	Dammed	Room at the bottom	Electricity	1	Reservoir	855	-	0	-	0	855	It is not clear whether this power plant is called like this. No information online. Barrrage de Ghrib
477	ANGOLA	BIOPIO	15.2	Hydropower	-12.4706, 13.7319	ROR	Room downstream	Electricity	1	Weir	11.4	Surge Tank	0.05	-	0	11.45	2,2 hm³ reservoir capacity, http://www.inrh.gv.ao/portal/snirha
653	ANGOLA	CAMBAMBE-1	260	Hydropower	-9.752325, 14.480853	Dammed	Room at the bottom	Electricity	1	Reservoir	157.6	-	0	-	0	157.6	Cambambe reservoir. Sharing with Cambambe 2 since 2013 https://pt.wikipedia.org/wiki/Central_Hidroel%C3%A9trica_de_Cambambe
654	ANGOLA	CAMBAMBE-2	700	Hydropower	-9.752325, 14.480853	Dammed	Room at the bottom	Electricity	1	Reservoir	0	-	0	-	0	0	It uses the Cambambe reservoir. Worldbank invested to increase from 175 to to 700 MW, opening in 2017
664	ANGOLA	CAPANDA	520	Hydropower	-9.795468, 15.467191	Dammed	Room at the bottom	Electricity	1	Reservoir	17104.4	-	0	-	0	17104.4	Large reservoir. In theory is only for hydropower, but I see that they are pumping for nearby irrigation. No data regarding this irrigation. https://en.wikipedia.org/wiki/Capanda_Dam
713	ANGOLA	CHICAPA-I	16	Hydropower	-9.48839939874731, 20.35097648786544	ROR	Room downstream	Electricity	1	Weir	22.55	-	0	-	0	22.55	Run of river
773	ANGOLA	CUANDO-I	1.25	Hydropower	-12.776111, 15.739167	ROR	Room downstream	Electricity	1	Weir	0.19	-	0	-	0	0.19
774	ANGOLA	CUANDO-II	2.2	Hydropower	-12.776111, 15.739167	ROR	Room at the bottom	Electricity	1	Weir	12.657	-	0	-	0	12.657	ROR
776	ANGOLA	CUBAL CHIMBASSI	0.032	Hydropower	-13.033333, 14.25	ROR	Room downstream	Electricity	1	-	0	-	0	-	0	0	By its size and location, it is likely a ROR with a OWS that is considered negligible in relation to the other hydros
777	ANGOLA	CUCHI MISSION	1.2	Hydropower	-14.653593, 16.894248	ROR	Room downstream	Electricity	1	Weir	1.47	-	0	-	0	1.47	no reservoir, probably ROR, https://www.hydroreview.com/world-regions/africa/angola-seeks-power-plan-two-small-hydro-pre-feasibility-studies/#gref
1033	ANGOLA	ESTACAO DO GANDA	0.039	Hydropower	-13.024544, 14.632931	ROR	Room downstream	Electricity	1	-	0	-	0	-	0	0	By its size and location, it is likely a ROR with a OWS that is considered negligible in relation to the other hydros
1061	ANGOLA	FAZENDA DA BONGA	0.122	Hydropower	-12.266667, 15.633333	ROR	Room downstream	Electricity	1	-	0	-	0	-	0	0	By its size and location, it is likely a ROR with a OWS that is considered negligible in relation to the other hydros
1062	ANGOLA	FAZENDA MATO GROSSO	1.611	Hydropower	-9.4333333, 15.85	ROR	Room downstream	Electricity	1	Weir	8	-	0	-	0	8
1130	ANGOLA	GANGELAS DAM	1.2	Hydropower	-15.183333, 13.7	Dammed	Room downstream	Electricity	1	Reservoir	658.12	-	0	-	0	658.12	Reservoir
1825	ANGOLA	LAUCA	2070	Hydropower	-9.74473923481954, 15.13108488869926	Dammed	Room at the bottom	Electricity	1	Reservoir	18800	-	0	-	0	18800	Downstream of Capanda. operational in 2017, but flooded in late 2019. https://en.wikipedia.org/wiki/La%C3%BAca_Hydroelectric_Power_Station
1880	ANGOLA	LOBITO AURORA	0.09	Hydropower	-12.348056, 13.545556	ROR	Room downstream	Electricity	1	-	0	-	0	-	0	0	By its size and location, it is likely a ROR with a OWS that is considered negligible in relation to the other hydros
1881	ANGOLA	LOBITO ISABEL	0.032	Hydropower	-12.348056, 13.545556	ROR	Room downstream	Electricity	1	-	0	-	0	-	0	0	By its size and location, it is likely a ROR with a OWS that is considered negligible in relation to the other hydros
1888	ANGOLA	LOMAUM	140	Hydropower	-12.7166667, 14.3833333	Dammed	Room downstream	Electricity	1	Reservoir	33.64	-	0	-	0	33.64	From 65 to 140 MW. https://fr.allafrica.com/stories/201602051613.html
1942	ANGOLA	LUQUIXE	1.12	Hydropower	-7.75, 15	ROR	Room downstream	Electricity	1	Weir	1.26	-	0	-	0	1.26
1954	ANGOLA	MABUBAS	26.8	Hydropower	-8.5316667, 13.6963889	Dammed	Room downstream	Electricity	1	Reservoir	246.71	-	0	-	0	246.71	Reservoir. https://www.jornaldeangola.ao/ao/noticias/barragem-das-mabubas-esta-a-produzir-abaixo-das-capacidades/
2101	ANGOLA	MATALA	41.4	Hydropower	-14.741504603285543, 15.04175335292917	Dammed	Room at the bottom	Electricity	1	Reservoir	1951.24	-	0	-	0	1951.24	Reservoir
2112	ANGOLA	MATOS VAZ	0.098	Hydropower	-8.466667, 15.216667	ROR	Room downstream	Electricity	1	-	0	-	0	-	0	0	By its size and location, it is likely a ROR with a OWS that is considered negligible in relation to the other hydros
2459	ANGOLA	NGOVE DAM	61.8	Hydropower	-12.809953107536536, 15.889881815476182	Dammed	Room downstream	Electricity	1	Reservoir	230.8	-	0	-	0	230.8	Reservoir. The power room looks old and abandoned. I could not find much info online
2505	ANGOLA	NOVA LISBOA MARSCHALL	0.034	Hydropower	-12.776111, 15.739167	ROR	Room downstream	Electricity	1	-	0	-	0	-	0	0	By its size and location, it is likely a ROR with a OWS that is considered negligible in relation to the other hydros
2777	ANGOLA	QUILENGUES MOURA	0.117	Hydropower	-14.066667, 14.083333	ROR	Room downstream	Electricity	1	-	0	-	0	-	0	0	By its size and location, it is likely a ROR with a OWS that is considered negligible in relation to the other hydros
2855	ANGOLA	RUACANA	347	Hydropower	-17.3833, 14.2167	Dammed	Room downstream	Multipurpose	1	Reservoir	448	-	0	-	0	448	The reservoir is located in Angola, while the power plant is located in Namibia (-17.398989837005455, 14.221680588989248). It indicates it provides also for irrigation, but there are no data regarding the irrigation. Allocated everything to electricity. https://www.britannica.com/topic/Ruacana-dam-Africa
3243	ANGOLA	TCHIHUMBWE	12.4	Hydropower	-11.0303267, 20.201313	ROR	Room downstream	Electricity	1	Weir	4.112	-	0	-	0	4.112	ready 28 months after August 2013. http://www.toyconstructions.com/angola-energy-minister-lays-cornerstone-for-construction-of-tchihumbwe-dam/
3462	ANGOLA	VILA NOVA AHLEFELD	0.028	Hydropower	-12.566667, 16.233333	ROR	Room downstream	Electricity	1	-	0	-	0	-	0	0	By its size and location, it is likely a ROR with a OWS that is considered negligible in relation to the other hydros
339	BURKINA FASO	BAGRE	14	Hydropower	11.475, -0.546	Dammed	Room downstream	Electricity	1	Reservoir	63	-	0	-	0	63	reservoir, installed 16 MW: https://www.e3s-conferences.org/articles/e3sconf/pdf/2022/13/e3sconf_cigb2022_03028.pdf
1711	BURKINA FASO	KOMPIENGA	16	Hydropower	11.07, 0.7	Dammed	Room downstream	Electricity	1	Reservoir	512	-	0	-	0	512	reservoir, installed 16 MW. Ref: Worldbank at https://www.afdb.org/en/documents/document/burkina-faso-kompienga-hydro-electrique-dam-project-9716
2464	BURKINA FASO	NIOFILA	1.89	Hydropower	10.667082, -5.099956	Dammed	Room downstream	Electricity	1	Reservoir	135.79	-	0	-	0	135.79	reservoir
3347	BURKINA FASO	TOURNI	0.62	Hydropower	10.771678821695867, -5.156035121542316	ROR	Room downstream	Electricity	1	Weir	3.0173	-	0	-	0	3.0173	Small river in a cascaded project that reaches a larger reservoir (Barrage de Niofila)
589	BURUNDI	BUHIGA	0.47	Hydropower	-3.0302, 30.1608	ROR	Room downstream	Electricity	1	-	0	-	0	-	0	0	By its size and location is likely a ROR. The size indicates that its OWS can be considered negligible in relation to other hydropower plants. https://en.wikipedia.org/wiki/List_of_power_stations_in_Burundi
606	BURUNDI	BURASIRA	0.03	Hydropower	-3.082, 29.9136	ROR	Room downstream	Electricity	1	-	0	-	0	-	0	0	Coordinates not matching. By its size and location, it is likely a ROR with a OWS that is considered negligible in relation to the other hydros
	BURUNDI	Bururi, Nyemanga Power Station	2.8	Hydropower	-3.5789, 29.34	ROR	Room downstream	Electricity	1	Weir	6.17	-	0	-	0	6.17	ROR, https://en.wikipedia.org/wiki/List_of_power_stations_in_Burundi
620	BURUNDI	BUTEZI	0.286	Hydropower	-3.422778, 30.151667	ROR	Room downstream	Electricity	1	-	0	-	0	-	0	0	I cannot find it. By its size and location is likely to be a ROR. We consider that its OWS are small enough to consider them negligible in relation to other hydropower plants.
1153	BURUNDI	GATONDE	0.16	Hydropower	-3.171111, 29.950806	ROR	Room downstream	Electricity	1	-	0	-	0	-	0	0	ROR in river Ruvubu. By its size and location is likely to be a ROR. We consider that its OWS are small enough to consider them negligible in relation to other hydropower plants.
1197	BURUNDI	GIKONGE	0.85	Hydropower	-3.2419, 29.6512	ROR	Room downstream	Electricity	1	-	0	-	0	-	0	0	By its size and location is likely to be a ROR. We consider that its OWS are small enough to consider them negligible in relation to other hydropower plants.
1208	BURUNDI	GISOZI	0.02	Hydropower	-3.5736, 29.6789	ROR	Room downstream	Electricity	1	-	0	-	0	-	0	0	By its size and location, it is likely a ROR with a OWS that is considered negligible in relation to the other hydros
1324	BURUNDI	HOPITAL DE KIREMBA	0.082	Hydropower	-2.817844, 29.981786	ROR	Room downstream	Electricity	1	-	0	-	0	-	0	0	I cannot find it. By its size and location is likely to be a ROR. We consider that its OWS are small enough to consider them negligible in relation to other hydropower plants.
1536	BURUNDI	KARENNI	0.85	Hydropower	-3.07454, 30.425317	ROR	Room downstream	Electricity	1	-	0	-	0	-	0	0	Not found. By its size and location is likely to be a ROR. We consider that its OWS are small enough to consider them negligible in relation to other hydropower plants.
1571	BURUNDI	KAYENZI	0.8	Hydropower	-2.8451, 30.3414	ROR	Room downstream	Electricity	1	-	0	-	0	-	0	0	By its size and location is likely a ROR. The size indicates that its OWS can be considered negligible in relation to other hydropower plants. https://en.wikipedia.org/wiki/List_of_power_stations_in_Burundi
[truncated: 513 more rows]

## Sheet: Hydro_Ev
ID_Number	Country	Plant	MW	GEN_TYPE	Degrees Coordinates	Ev_Jan	Ev_Feb	Ev_Mar	Ev_Apr	Ev_May	Ev_Jun	Ev_Jul	Ev_Aug	Ev_Sep	Ev_Oct	Ev_Nov	Ev_Dec	Total_Ev mm
[truncated: 563 more rows]

[truncated: 3 more sheets: Water_intensities, Withdrawal WIs, Consumptive WIs]
