# Supplementary material for: Spatially distributed freshwater demand for electricity in Africa
Source: Royal Society of Chemistry journal article supplement (doi:10.1039/d4ew00246f), 2024-01-01
Supplement: d4ew00246f3.xlsx [file d4ew00246f3.xlsx]

## Sheet: Info
Worksheet:
(sub)national	(Sub)national data on WW and WC (in m3) according to power plant fuel type. Subnational data according to GADM Level 1 regions
riverbasins	Data on WW and WC (in m3) according to power plant fuel type for major African river basins. River basin data according to hydrosheds

## Sheet: (sub)national
		WW in m3											WC in m3
		fossil fuels			renewables					other		total	fossil fuels			renewables					other		total
GADM Level 1 Name	GADM Level 1 Code	Oil	Coal	natural gas	Hydropower	Wind	Sun	Biomass	Geo	Uranium	waste heat		Oil	Coal	natural gas	Hydropower	Wind	Sun	Biomass	Geo	Uranium	waste heat
ALGERIA		429600		83220763	10699359	0	140147				65756	94555625	325016		66379505	10699359	0	98101				46029	77548010
Adrar	DZA.1_1	16050		753401		0	11521					780972	11235		600600		0	8064					619899
Alger	DZA.4_1			7617871								7617871			6092716								6092716
Aïn Témouchent	DZA.3_1			176612								176612			123629								123629
Annaba	DZA.5_1	299911		1576264								1876175	234234		1261011								1495245
Batna	DZA.6_1			4966481								4966481			3973185								3973185
Béchar	DZA.7_1	43965		813152			970					858087	30776		650521			679					681976
Biskra	DZA.9_1			2814756								2814756			2251805								2251805
Béjaïa	DZA.8_1			1144668	1927067							3071735			915734	1927067							2842801
Blida	DZA.10_1			4691261								4691261			3753009								3753009
Blida	DZA.4_1			3502808								3502808			2802246								2802246
Bouira	DZA.12_1				620							620				620							620
Boumerdès	DZA.13_1	1673		275515	379541							656729	1171		189470	379541							570182
El Bayadh	DZA.17_1	370										370	259										259
El Oued	DZA.18_1	2413		3878109								3880522	1689		3102487								3104176
El Tarf	DZA.19_1			176612								176612			123629								123629
Ghardaïa	DZA.20_1	7160		878204			21					885385	5012		702563			15					707590
Illizi	DZA.22_1	6952		1435526			3263					1445741	4866		1148421			2283					1155570
Jijel	DZA.23_1			292440	4325473							4617913			201741	4325473							4527214
Khenchela	DZA.24_1			2732779								2732779			2176907								2176907
Laghouat	DZA.25_1			7265233			88346				9517	7363096			5810619			61842				6662	5879123
Médéa	DZA.28_1	8045		3064957								3073002	5631		2451966								2457597
M'Sila	DZA.26_1			4566161								4566161			3652928								3652928
Naâma	DZA.31_1			171167								171167			119817								119817
Oran	DZA.32_1			5711738								5711738			4542802								4542802
Ouargla	DZA.33_1	15688		12668753			670					12685111	10981		10133616			469					10145066
Oum el Bouaghi	DZA.34_1			1876504								1876504			1501203								1501203
Relizane	DZA.35_1			2814756	0							2814756			2251805	0							2251805
Saïda	DZA.36_1						4102					4102						2871					2871
Skikda	DZA.39_1	141		3627062							56239	3683442	99		2896472							39367	2935938
Souk Ahras	DZA.40_1						12305					12305						8614					8614
Sétif	DZA.37_1			149237								149237			104466								104466
Tamanghasset	DZA.41_1	11062		766187			1231					778480	7744		612642			861					621247
Tiaret	DZA.43_1			2627106								2627106			2101685								2101685
Tindouf	DZA.44_1	16170					17718					33888	11319					12403					23722
Tipaza	DZA.45_1			185443								185443			129810								129810
Tlemcen	DZA.48_1				4066658							4066658				4066658							4066658
ANGOLA		3588734		9936573	355515051							369040358	2784152		4054884	355515051							362354087
Bengo	AGO.1_1	28987			2833998							2862985	20291			2833998							2854289
Benguela	AGO.2_1	712679			433914							1146593	559978			433914							993892
Bié	AGO.3_1	18568										18568	12998										12998
Cabinda	AGO.4_1	64672		488913								553585	45271		389763								435034
Cuando Cubango	AGO.5_1	10255			12808							23063	7178			12808							19986
Cuanza Norte	AGO.6_1	957			169057120							169058077	670			169057120							169057790
Cuanza Sul	AGO.7_1	64399			151340409							151404808	45078			151340409							151385487
Cunene	AGO.8_1	15423										15423	10796										10796
Huambo	AGO.9_1	41729			2419838							2461567	29211			2419838							2449049
Huíla	AGO.10_1	63687			24976586							25040273	44582			24976586							25021168
Luanda	AGO.11_1	2018291		651757								2670048	1585721		521406								2107127
Lunda Norte	AGO.12_1	70614			204303							274917	49430			204303							253733
Lunda Sul	AGO.13_1	43890			0							43890	30723			0							30723
Malanje	AGO.14_1	3336			73224							76560	2335			73224							75559
Moxico	AGO.15_1	27346										27346	19142										19142
Namibe	AGO.16_1	399553		54691								454244	317705		38284								355989
Omusati	AGO.8_1				4149909							4149909				4149909							4149909
Uíge	AGO.17_1	4348			12942							17290	3043			12942							15985
Zaire	AGO.18_1			8741212								8741212			3105431								3105431
Ascension island		227				0	700					927	159				0	490					649
Ascension	SHN.1_1	227				0	700					927	159				0	490					649
BENIN		136309		27831			697					164837	95416		19482			488					115386
Atakora	BEN.2_1	9331										9331	6532										6532
Atlantique	BEN.3_1			27831								27831			19482								19482
Borgou	BEN.4_1	17569										17569	12298										12298
Donga	BEN.6_1						697					697						488					488
Littoral	BEN.8_1	97103										97103	67971										67971
Ouémé	BEN.10_1	9331										9331	6532										6532
Plateau	BEN.11_1	2049										2049	1435										1435
Zou	BEN.12_1	926										926	648										648
BOTSWANA		5276	434803				199					440278	4113	304362				139					308614
Central	BWA.1_1	4232	434803									439035	3382	304362									307744
Francistown	BWA.3_1	987										987	691										691
Gaborone	BWA.4_1						199					199						139					139
Ghanzi	BWA.5_1	21										21	15										15
Kgalagadi	BWA.7_1	20										20	14										14
North-West	BWA.12_1	16										16	11										11
BURKINA FASO		316925			5443542		5863	132				5766462	221842			5443542		4103	93				5669580
Boucle du Mouhoun	BFA.1_1	12046										12046	8430										8430
Cascades	BFA.2_1	595			0							595	416			0							416
Centre	BFA.7_1	175386					4031	132				179549	122771					2821	93				125685
Centre-Est	BFA.3_1	1080										1080	756										756
Centre-Nord	BFA.4_1	27875										27875	19513										19513
Centre-Ouest	BFA.5_1	18618										18618	13033										13033
Centre-Sud	BFA.3_1				645836							646185	244			645836							646080
Centre-Sud	BFA.6_1	349
Est	BFA.8_1	10486			4797706							4808192	7340			4797706							4805046
Haut-Bassins	BFA.9_1	20231										20231	14161										14161
Nord	BFA.10_1	5033										5033	3522										3522
Plateau-Central	BFA.11_1	52										52	36										36
Sahel	BFA.12_1	42655					1832					44487	29857					1282					31139
Sud-Ouest	BFA.13_1	2519										2519	1763										1763
BURUNDI		46511			55209							101720	32558			55209							87767
Bujumbura Mairie	BDI.2_1	46511			0							46511	32558			0							32558
Bujumbura Rural	BDI.3_1				0							0				0							0
Bururi	BDI.4_1				46109							46109				46109							46109
Cankuzo	BDI.5_1				0							0				0							0
Gitega	BDI.7_1				9100							9100				9100							9100
Karuzi	BDI.8_1				0							0				0							0
Kayanza	BDI.9_1				0							0				0							0
Kirundo	BDI.13_1				0							0				0							0
Muramvya	BDI.12_1				0							0				0							0
Muyinga	BDI.13_1				0							0				0							0
Mwaro	BDI.14_1				0							0				0							0
Ngozi	BDI.15_1				0							0				0							0
Rutana	BDI.16_1				0							0				0							0
Ruyigi	BDI.17_1				0							0				0							0
CAMEROON		627109		254113	588321608		0					589202830	438976		182820	588321608		0					588943404
Bioko Norte	GNQ.2_1			49410								49410			39528								39528
Centre	CMR.2_1	95023										95023	66516										66516
Est	CMR.3_1	9704			0							9704	6793			0							6793
Extrême-Nord	CMR.4_1	4044										4044	2830										2830
Littoral	CMR.5_1	202459			872892		0					1075351	141721			872892		0					1014613
Nord	CMR.7_1	24261			584911391							584935652	16983			584911391							584928374
Nord-Ouest	CMR.6_1				0							0				0							0
Ouest	CMR.8_1	61906										61906	43335										43335
Sud	CMR.10_1	20218		204703	2537325							2762246	14152		143292	2537325							2694769
Sud-Ouest	CMR.9_1	209494			0							209494	146646			0							146646
CAPE VERDE		123581		276		0	751					124608	86506		193		0	525					87224
Boa Vista	CPV.1_1	786				0						786	550				0						550
Brava	CPV.2_1	874				0						874	612				0						612
Maio	CPV.3_1	792				0						792	554				0						554
Mosteiros	CPV.4_1	220										220	154										154
Paúl	CPV.5_1	393										393	275										275
Porto Novo	CPV.6_1			276								276			193								193
Praia	CPV.15_1	34				0	2					36	24				0	1					24
Praia	CPV.7_1	82358				0	344					82702	57650				0	241					57650
Ribeira Brava	CPV.8_1	751										751	526										526
Ribeira Grande de Santiago	CPV.10_1	83										83	58										58
Sal	CPV.11_1	14288				0	405					14693	10001				0	283					10284
Santa Catarina	CPV.12_1	1419				0						1419	993				0						993
Santa Cruz	CPV.14_1	439										439	308										308
São Domingos	CPV.15_1	65										65	46										46
São Filipe	CPV.16_1					0						0					0						0
São Miguel	CPV.18_1					0						0					0						0
São Vicente	CPV.20_1	20460				0						20460	14322				0						14322
Tarrafal	CPV.21_1	619										619	433										433
CENTRAL AFRICAN REPUBLIC		308			3628594							3628902	215			3628594							3628809
Basse-Kotto	CAF.3_1	6										6	4										4
Haute-Kotto	CAF.5_1	14										14	10										10
Lobaye	CAF.7_0	10										10	7										7
Lobaye	CAF.7_1	6										6	4										4
Mambéré-Kadéï	CAF.8_1	50			0							50	35			0							35
Mbomou	CAF.9_1	10			0							10	7			0							7
Nana-Grébizi	CAF.10_1				0							0				0							0
Nana-Mambéré	CAF.11_1	31										31	22										22
Ombella-M'Poko	CAF.12_1	124			121349							121473	87			121349							121436
Ouaka	CAF.13_1	39										39	27										27
Ouham	CAF.15_1	9										9	6										6
Ouham-Pendé	CAF.14_1	9			3507245							3507254	6			3507245							3507251
CHAD		892631		78149		0	0					970780	783161		54704		0	0					837865
Batha	TCD.2_1	434										434	304										304
Chari-Baguirmi	TCD.4_1	382										382	268										268
Ennedi Est	TCD.5_1					0						0					0						0
Guéra	TCD.7_1	434										434	304										304
Hadjer-Lamis	TCD.8_1	730706										730706	669813										669813
Kanem	TCD.9_1	434										434	304										304
Logone Oriental	TCD.12_1	105957		78149								184106	74169		54704								128873
Mandoul	TCD.13_1						0					0						0					0
Mayo-Kebbi Est	TCD.14_1	469										469	328										328
Mayo-Kebbi Ouest	TCD.15_1	9155										9155	6409										6409
Moyen-Chari	TCD.16_1	2389					0					2389	1672					0					1672
Ouaddaï	TCD.17_1	434										434	304										304
Salamat	TCD.18_1	434										434	304										304
Tibesti	TCD.21_1	869										869	608										608
Ville de N'Djamena	TCD.22_1	40030										40030	28021										28021
Wadi Fira	TCD.23_1	504										504	353										353
COMOROS		21407			0							21407	14985			0							14985
Mwali	COM.3_1	1650			0							1650	1155			0							1155
Njazídja	COM.2_1	15153										15153	10607										10607
Nzwani	COM.1_1	4604			0							4604	3223			0							3223
CONGO (republic of het Congo)				1876985	77172675							79049660			1496796	77172675							78669471
Bouenza	COG.1_1				67188							67188				67188							67188
Kouilou	COG.5_1			1875496								1875496			1495754								1495754
Plateaux	COG.9_1				68240588							68240588				68240588							68240588
Pointe Noire	COG.10_1			1489								1489			1042								1042
Sangha	COG.12_1				8864899							8864899				8864899							8864899
CONGO DEM REP		3721		3219	357464862							357471802	2607		2575	357464862							357470044
Haut-Katanga	COD.3_1	821			343908653							343909474	575			343908653							343909228
Haut-Lomami	COD.4_1				2925784							2925784				2925784							2925784
Haut-Uele	COD.5_1	20			0							20	14			0							14
Sud-Kivu	COD.22_1				982292							982292				982292							982292
Ituri	COD.6_1	143			0							143	100			0							100
Kasaï	COD.9_1	143			0							143	100			0							100
Kasaï-Central	COD.7_1	290			0							290	203			0							203
Kasaï-Oriental	COD.8_1	143			0							143	100			0							100
Haut-Uele	COD.5_1				118520							118520				118520							118520
Kinshasa	COD.10_1	346										346	243										243
Kinshasa	COD.11_1	20										20	14										14
Kongo-Central	COD.11_1	307		3219	3068782							3072308	215		2575	3068782							3071572
Kwilu	COD.13_1	61			2632780							2632841	43			2632780							2632823
Lualaba	COD.15_1	689			3719364							3720053	482			3719364							3719846
Maniema	COD.17_1	61			58686							58747	43			58686							58729
Mongala	COD.18_1	142										142	100										100
Nord-Kivu	COD.19_1				50001							50001				50001							50001
Équateur	COD.2_1	449										449	314										314
Sud-Ubangi	COD.23_1	30										30	21										21
Tanganyika	COD.24_1	41			0							41	29			0							29
Tshopo	COD.25_1	15			0							15	11			0							11
COTE D'IVOIRE		22745		1550441	348292134			406				349865726	15921		1204688	348292134			284				349513027
Abidjan	CIV.1_1	22745		1550441								1573186	15921		1204688								1220609
Bas-Sassandra	CIV.2_1				137472046							137472046				137472046							137472046
Lagunes	CIV.7_1				13166930							13166930				13166930							13166930
Vallée du Bandama	CIV.11_1							406				406							284				284
Yamoussoukro	CIV.13_1				197653158							197653158				197653158							197653158
DJIBOUTI		1101548					9					1101557	980815					6					980821
Ali Sabieh	DJI.1_2	1617					9					1626	1132					6					1138
Arta	DJI.6_1	5281										5281	3697										3697
Dikhil	DJI.2_1	1617										1617	1132										1132
Djiboutii	DJI.3_1	1064930										1064930	955182										955182
Obock	DJI.4_1	1820										1820	1274										1274
Tadjoura	DJI.5_1	26283										26283	18398										18398
EGYPT		345207130		8361164836	190110061	0	570814	39586654				8936639495	5708230		123340101	190110061	0	399572	255614				319813578
Ad Daqahliyah	EGY.1_1			290648074			151					290648225			9142140			106					9142246
Al Bahr al Ahmar	EGY.2_1	71182		1155746		0	1665					1228593	49827		924597		0	1166					975590
Al Buhayrah	EGY.3_1	925014		1187514980			6					1188440000	615794		9492549			4					10108347
Al Fayyum	EGY.4_1	2629			0		1					2630	1841			0		1					1842
Al Gharbiyah	EGY.5_1	40905										40905	28634										28634
Al Iskandariyah	EGY.6_1	49950		5517143								5567093	34966		3700177								3735143
Al Isma`iliyah	EGY.7_1	28421		393573								421994	19895		271646								291541
Al Jizah	EGY.19_1			1279112407								1279112407			6943753								6943753
Al Jizah	EGY.8_1	23255		3127532237			316049	12057				3127883598	16278		21952001			221235	8440				22197954
Al Minufiyah	EGY.9_1			13186								13186			9230								9230
Al Minya	EGY.10_1	959						4521				5480	671						3165				3836
Al Qahirah	EGY.11_1	252907		628420617								628673524	177034		6803530								6980564
Al Qahirah	EGY.8_1	22318		459168556								459190874	15623		2492629								2508252
Al Qalyubiyah	EGY.11_1	34106										34106	23874										23874
Al Qalyubiyah	EGY.12_1	28990		281123606								281152596	20293		1546180								1566473
Al Uqsur	EGY.13_1				0		303					303				0		212					212
Al Wadi al Jadid	EGY.14_1	27285		226773			909					254967	19099		180856			636					200591
As Suways	EGY.15_1	2586		5710932		0						5713518	1810		4486398		0						4488208
Ash Sharqiyah	EGY.16_1	7930										7930	5551										5551
Aswan	EGY.17_1	20591			188148433		249762	9495				188428281	14414			188148433		174834	6646				188344327
Asyut	EGY.18_1	332077126		393573048	1734027							727384201	2006902		2136539	1734027							5877468
Bani Suwayf	EGY.19_1			68369261								68369261			24289080								24289080
Bur Sa`id	EGY.20_1	62527		255636								318163	43769		170180								213949
Dumyat	EGY.21_1	1918		563522787								563524705	1343		4084708								4086051
Janub Sina'	EGY.22_1	3106966		330555								3437521	2479705		264443								2744148
Kafr ash Shaykh	EGY.23_1	5684		68398135								68403819	3979		24309292								24313271
Matrouh	EGY.24_1	24158		177584			1514					203256	16910		140173			1060					158143
Qina	EGY.25_1	28848						39560581				39589429	20193						237363				257556
Al Bahr al Ahmar/Red Sea	EGY.2_1/SDN.11_1						454					454						318					318
Shamal Sina'	EGY.26_1	59467										59467	40017										40017
Suhaj	EGY.27_1	8301408			227601							8529009	49808			227601							277409
EQUATORIAL GUINEA		24489		753168	64332							841989	17142		598933	64332							680407
Annobón	GNQ.1_1	948										948	663										663
Bioko Norte	GNQ.2_1			717155	52356							769511			573724	52356							626080
Bioko Sur	GNQ.3_1				11976							11976				11976							11976
Centro Sur	GNQ.4_1				0							0				0							0
Litoral	GNQ.6_1	23541		36013								59554	16479		25209								41688
ERITREA		85887				0	1400					87287	58685				0	979					59664
Anseba	ERI.6_1	633										633	443										443
Debub	ERI.5_1	1266										1266	886										886
Debubawi Keyih Bahri	ERI.3_1	5511				0						5511	3858				0						3858
Gash Barka	ERI.4_1	15645					1105					16750	10952					773					11725
Maekel	ERI.1_1	20966					295					21261	14676					206					14882
Semenawi Keyih Bahri	ERI.2_1	41866										41866	27870										27870
ETHIOPIA		983			918798955	0	1	109821				918909755	693			918798955	0	1	93111				918892756
Addis Abeba	ETH.1_1	175						24595				24770	122						19209				19331
Afar	ETH.2_1	12						54237				54249	9						49718				49727
Amhara	ETH.3_1	22			129169415		1					129169438	17			129169415		1					129169433
Benshangul-Gumaz	ETH.4_1	7										7	5										5
Dire Dawa	ETH.5_1	339										339	238										238
Harari People	ETH.7_1	14										14	10										10
Oromia	ETH.8_1	351			603480709	0		30989				603512049	245			603480709	0		24184				603505138
Oromia	ETH.8_1				31593							31593				31593							31593
Somali	ETH.9_1	13			613108							613121	10			613108							613118
Southern Nations, Nationalities	ETH.10_1	16			185504130							185504146	12			185504130							185504142
Tigray	ETH.11_1	29				0						29	21				0						21
GABON		39860		1061056	161744							1262660	27902		818795	161744							1008441
Estuaire	GAB.1_1	234		251669	0							251903	164		176167	0							176331
Haut-Ogooué	GAB.2_1	4416			146459							150875	3091			146459							149550
Moyen-Ogooué	GAB.3_1	2081										2081	1457										1457
Ngounié	GAB.4_1	1463			15285							16748	1024			15285							16309
Nyanga	GAB.5_1	971		4322								5293	679		3025								3704
Ogooué-Ivindo	GAB.6_1	586										586	410										410
Ogooué-Lolo	GAB.7_1	2099			0							2099	1470			0							1470
Ogooué-Maritime	GAB.8_1	25149		805065								830214	17604		639603								657207
Wouleu-Ntem	GAB.9_1	2861										2861	2003										2003
GAMBIA		134830				0	10					134840	94379				0	7					94386
Banjul	GMB.6_1	52863										52863	37004										37004
Maccarthy Island	GMB.3_1	1803										1803	1262										1262
North Bank	GMB.4_1	4955										4955	3467										3467
Upper River	GMB.5_1	3448										3448	2413										2413
Western	GMB.6_1	71761				0	10					71771	50233				0	7					50240
GHANA		64757820	99073	69254051	7782523939		3523	14774				7916653180	446094	78433	5228640	7782523939		2466	6244				7788285816
Ashanti	GHA2_2	16121						103				16224	11284						72				11356
Central	GHA5_2	63					3132	161				3356	44					2192	113				2349
Eastern	GHA6_2	4771			7502870466			670				7502875907	3340			7502870466			469				7502874275
Greater Accra	GHA6_2				0							0				0							0
Greater Accra	GHA7_2	64698034		5499156	0							70197190	404245		2649910	0							3054155
Kindia	GIN.5_1				23770369							23770369				23770369							23770369
Oti	GHA10_2	198										198	138										138
Savannah	GHA3_2				255883104							255883104				255883104							255883104
Upper East	GHA12_2						391					391						274					274
Volta	GHA10_2				0							0				0							0
Western	GHA15_2	38633		63754895				1956				63795484	27043		2578730				1368				2607141
Western North	GHA16_2		99073					11884				110957		78433					4222				82655
GUINEA		237403			60085495							60322898	166181			60085495							60251676
Boké	GIN.1_1	46915										46915	32840										32840
Conakry	GIN.2_1	157793										157793	110455										110455
Faranah	GIN.3_1	1322			39060							40382	925			39060							39985
Kankan	GIN.4_1	29082										29082	20357										20357
Kindia	GIN.5_1				60046435							60046435				60046435							60046435
Mamou	GIN.7_1				0							0				0							0
Nzérékoré	GIN.8_1	2291			0							2291	1604			0							1604
GUINEA-BISSAU		19395					1504					20899	13576					1053					14629
Bafatá	GNB.1_1	112					1504					1616	79					1053					1132
Bissau	GNB.3_1	19283										19283	13497										13497
KENYA		546904			272318922	0	16446	50683	1780524		1034	274714513	391152			272318922	0	11513	35478	1218837		724	273976626
Baringo	KEN.1_1							8596				8596							6017				6017
Bomet	KEN.2_1	802			0							802	561			0							561
Bomet	KEN.33_1				0							0				0							0
Bungoma	KEN.3_1							538				538							377				377
Embu	KEN.22_1				189512160							189512160				189512160							189512160
Embu	KEN.6_1				1931312							1931312				1931312							1931312
Garissa	KEN.40_1	6208										6208	4345										4345
Marsabit	KEN.25_1	5										5	4										4
Homa Bay	KEN.8_1				0		12					12				0		9					9
Kajiado	KEN.10_1	57015				0	7	14				57036	39910				0	5	10				39925
Kakamega	KEN.11_1							16500				16500							11550				11550
Kericho	KEN.12_1	1233			41036	0						42269	863			41036	0						41899
Kericho	KEN.2_1	140										140	98										98
Kiambu	KEN.13_1	49663			12338		19				496	62516	34764			12338		14				347	47463
Kilifi	KEN.14_1	55871					1926	107			538	58442	39109					1348	75			377	40909
Kirinyaga	KEN.15_1				1094							1094				1094							1094
Kisii	KEN.16_1				0							0				0							0
Kisumu	KEN.17_1	85088			0			12375				97463	67885			0			8662				76547
Kitui	KEN.18_1				0							0				0							0
Kwale	KEN.19_1							6457				6457							4520				4520
Laikipia	KEN.20_1						20					20						14					14
Lamu	KEN.21_1	1214										1214	850										850
Machakos	KEN.22_1	49663			8469170		26					8518859	34764			8469170		18					8503952
Makueni	KEN.23_1						0					0						0					0
Mandera	KEN.24_1	1552					45					1597	1086					32					1118
Marsabit	KEN.25_1	335				0						335	235				0						235
Meru	KEN.26_1				0		16					16				0		11					11
Migori	KEN.27_1				27691			2583				30274				27691			1808				29499
Mombasa	KEN.28_1	163992					20					164012	114795					14					114809
Murang'a	KEN.29_1	1862			60837							62699	1304			60837							62141
Nairobi	KEN.30_1	67665				0	18					67683	47366				0	12					47378
Nakuru	KEN.31_1						10	2006	1780524			1782540						6	1404	1218837			1220247
Nandi	KEN.32_1						27					27						19					19
Nyandarua	KEN.35_1						1					1						1					1
Nyeri	KEN.36_1				10231							10231				10231							10231
Tana River	KEN.40_1						8271					8271						5790					5790
Tharaka-Nithi	KEN.41_1				0							0				0							0
Turkana	KEN.43_1	1552										1552	1086										1086
Uasin Gishu	KEN.44_1				2506		6028	1507				10041				2506		4220	1055				7781
Wajir	KEN.46_1	3044										3044	2131										2131
West Pokot	KEN.47_1				72250547							72250547				72250547							72250547
LESOTHO					0							0				0							0
LIBERIA		134842			114071		1					248914	94390			114071		0					208461
Bomi	LBR.1_1	1148			0							1148	804			0							804
Grand Bassa	LBR.5_1	26454			114071							140525	18518			114071							132589
Lofa	LBR.8_1				0		1					1				0		0					0
Montserrado	LBR.11_1	36696										36696	25687										25687
Nimba	LBR.12_1	70544										70544	49381										49381
LIBYA		7345046		36355530								43700576	5751163		28988169								34739332
Al Butnan	LBY.1_1	56332										56332	37501										37501
Al Jabal al Gharbi	LBY.3_1	9191										9191	6433										6433
Al Jifarah	LBY.4_1	263972										263972	182083										182083
Al Jufrah	LBY.5_1	6127										6127	4289										4289
Al Kufrah	LBY.6_1	3674025										3674025	2939220										2939220
Al Marqab	LBY.8_1			8062376								8062376			6439187								6439187
Al Wahat	LBY.9_1	568261		14535382								15103643	437403		11628305								12065708
An Nuqat al Khams	LBY.10_1	11994		635782								647776	8396		508625								517021
Az Zawiyah	LBY.11_1	10833		239353								250186	7212		167547								174759
Benghazi	LBY.12_1	72100		288387								360487	48094		201871								249965
Darnah	LBY.13_1	82208		294932								377140	55614		235946								291560
Ghat	LBY.14_1	24015										24015	16810										16810
Misratah	LBY.15_1	5331		220630								225961	3732		151550								155282
Nalut	LBY.17_1			6792974								6792974			5434379								5434379
Sabha	LBY.18_1	280391										280391	196273										196273
Surt	LBY.19_1	87414		58176								145590	58251		38729								96980
Tripoli	LBY.20_1	2165168										2165168	1730473										1730473
Wadi al Hayat	LBY.21_1	27684		5227538								5255222	19379		4182030								4201409
MADAGASCAR		226624	539561		70738		3627					840550	163897	421403		70738		2538					658576
Antananarivo	MDG.1_1	130341			0							130341	96506			0							96506
Antsiranana	MDG.2_1	23435										23435	16403										16403
Fianarantsoa	MDG.3_1	4253			10421							14674	2979			10421							13400
Mahajanga	MDG.4_1	15395			0		2789					18184	10771			0		1952					12723
Toamasina	MDG.5_1	27716	539561		60317		342					627936	19402	421403		60317		239					501361
Toliary	MDG.6_1	25484					496					25980	17836					347					18183
MALAWI		59232		22050	1214907			11906				1308095	41464		15435	1214907			8334				1280140
Blantyre	MWI.2_1	178										178	125										125
Blantyre	MWI.4_1			22050								22050			15435								15435
Chikwawa	MWI.3_1				780295			7004				787299				780295			4902				785197
Chitipa	MWI.5_1	267										267	187										187
Karonga	MWI.8_1	54351			1523							55874	38046			1523							39569
Kasungu	MWI.9_1	258										258	181										181
Likoma	MWI.10_1	935										935	655										655
Lilongwe	MWI.11_1	1194										1194	836										836
Mulanje	MWI.15_1				883							883				883							883
Mzimba	MWI.17_1	980										980	686										686
Neno	MWI.2_1				432206							432206				432206							432206
Nkhotakota	MWI.20_1	1069						4902				5971	748						3432				4180
MALI		257053			60542939		8013					60808005	179940			60542939		5609					60728488
Bamako	MLI.1_1	59624			0							59624	41737			0							41737
Gao	MLI.2_1	2829										2829	1980										1980
Kayes	MLI.3_1	93584			60542939		7986					60644509	65509			60542939		5590					60614038
Koulikoro	MLI.5_1	43144			0							43144	30202			0							30202
Mopti	MLI.6_1	4385										4385	3070										3070
Ségou	MLI.5_1	707										707	495										495
Ségou	MLI.7_1	2561					2					2563	1793					1					1794
Sikasso	MLI.8_1	48896			0		25					48921	34228			0		18					34246
Timbuktu	MLI.9_1	1323										1323	926										926
MAURITANIA		371277				0	7821					379098	259893				0	5475					265368
Adrar	MRT.1_1	2416					320					2736	1691					224					1915
Assaba	MRT.2_1	3342					208					3550	2339					146					2485
Brakna	MRT.3_1	359					320					679	251					224					475
Dakhlet Nouadhibou	MRT.4_1	74617				0	320					74937	52231				0	224					52455
Gorgol	MRT.5_1	173										173	121										121
Guidimaka	MRT.6_1	198										198	139										139
Hodh ech Chargui	MRT.7_1	3320					125					3445	2324					87					2411
Hodh el Gharbi	MRT.8_1	245					336					581	171					235					406
Hodh el Gharbi	MRT.8_1	339										339	238										238
Inchiri	MRT.9_1	54663					1200					55863	38264					840					39104
Nouakchott	MRT.10_1	173332				0	4832					178164	121333				0	3383					124716
Tagant	MRT.11_1	979										979	685										685
Tiris Zemmour	MRT.12_1	57043										57043	39930										39930
Trarza	MRT.13_1	251					160					411	176					112					288
MAURITIUS		291452	4804910	330126	671877	0	2192	4264850				10365407	204017	4404500	264101	671877	0	1534	3885266				9431295
Black River	MUS.2_1				456379		2190					458569				456379		1533					457912
Flacq	MUS.3_1				0	0		1072487				1072487				0	0		977388				977388
Grand Port	MUS.4_1		2008555		215498			431606				2655659		1841175		215498			387746				2444419
Pamplemousses	MUS.6_1				0			1810080				1810080				0			1658790				1658790
Pamplemousses	MUS.9_1		1562209									1562209		1432025									1432025
Plaines Wilhems	MUS.5_1				0		0					0				0		0					0
Plaines Wilhems	MUS.7_1				0			2029				2029				0			1421				1421
Port Louis	MUS.5_1	101784						20017				121801	71249						14012				85261
Port Louis	MUS.8_1	179851		330126			2					509979	125896		264101			1					389998
Rivière du Rempart	MUS.9_1							11069				11069							7749				7749
Rodriguez	MUS.10_1	9817				0						9817	6872				0						6872
Savanne	MUS.12_1		1234146		0			917562				2151708		1131300		0			838160				1969460
MAYOTTE		61338		31913			1873					95124	42937		22339			1311					66587
Dzaoudzi	MYT.8_1	29923										29923	20946										20946
Koungou	MYT.10_1	31415		31913			1873					65201	21991		22339			1311					45641
MOROCCO		51966856	9291483	20398410	239069626	0	10081911	16623			27267	330852176	2151805	7571129	14070895	239069626	0	7057338	11636			19087	269951516
Chaouia - Ouardigha	MAR.1_1	57			9115981							9116038	40			9115981							9116021
Doukkala - Abda	MAR.1_1				20917							20917				20917							20917
Doukkala - Abda	MAR.2_1		3673526		1202180							4875706		2571468		1202180							3773648
Fès - Boulemane	MAR.3_1				4819522							4819522				4819522							4819522
Gharb - Chrarda - Béni Hssen	MAR.4_1	50256614			137831257							188087871	789729			137831257							138620986
Grand Casablanca	MAR.5_1	1475373	319808	5796506								7591687	1180298	223865	4637205								6041368
Guelmim - Es-Semara	MAR.6_1	61112			461493							522605	42778			461493							504271
Laâyoune - Boujdour - Sakia El H	MAR.7_1					0						0					0						0
Marrakech - Tensift - Al Haouz	MAR.1_1				28456113							28456113				28456113							28456113
Marrakech - Tensift - Al Haouz	MAR.8_1				6923701	0						6923701				6923701	0						6923701
Meknès - Tafilalet	MAR.9_1						9078					9078						6355					6355
Oriental	MAR.10_1		5298149	2898253	1237579		34918	1566			26944	9497409		4775796	2318603	1237579		24442	1096			18861	8376377
Rabat - Salé - Zemmour - Zaer	MAR.11_1							11992				11992							8394				8394
Souss - Massa - Draâ	MAR.12_1	173696			25837263		10037915				323	36049197	138957			25837263		7026541				226	33002987
Tadla - Azilal	MAR.13_1				17693399			3065				17696464				17693399			2146				17695545
Tanger - Tétouan	MAR.14_1	4		11703651	5470221	0	0					17173876	3		7115087	5470221	0	0					12585311
MOZAMBIQUE		5791		674775	2600667590		0	112539				2601460695	4056		482294	2600667590		0	101162				2601255102
Cabo Delgado	MOZ.1_1	774										774	542										542
Gaza	MOZ.2_1			67393	102501506							102568899			47175	102501506							102548681
Inhambane	MOZ.3_1	219										219	153										153
Manica	MOZ.4_1				134647957							134647957				134647957							134647957
Maputo	MOZ.6_1			484250	44415044			103314				45002608			338975	44415044			94705				44848724
Maputo City	MOZ.5_1	983		23612								24595	688		16528								17216
Nampula	MOZ.7_1	1897										1897	1330										1330
Nassa	MOZ.8_1	269			0							269	189			0							189
Omusati	NAM.9_1						0					0						0					0
Sofala	MOZ.9_1			99520				9225				108745			79616				6457				86073
Tete	MOZ.10_1	985			2319103083							2319104068	689			2319103083							2319103772
Zambezia	MOZ.11_1	664										664	465										465
NAMIBIA		1936	8605			0	26935	757				38233	1355	6023			0	18853	694				26925
!Karas	NAM.1_1					0	760					760					0	532					532
Erongo	NAM.2_1	1884					9002					10886	1319					6301					7620
Hardap	NAM.3_1						13850					13850						9694					9694
Khomas	NAM.5_1		8605				95					8700		6023				67					6090
Kunene	NAM.6_1							757				757							694				694
Omaheke	NAM.8_1						1521					1521						1064					1064
Otjozondjupa	NAM.12_1	52					1707					1759	36					1195					1231
NIGER		276483	999328	573			1064					1277448	193539	916050	401			745					1110735
Abia	NGA.1_1			573								573			401								401
Agadez	NER.1_1	33210	999328									1032538	23247	916050									939297
Niamey	NER.5_1	99028										99028	69320										69320
Tahoua	NER.6_1	5692					1064					6756	3985					745					4730
Tillabéry	NER.7_1	113850										113850	79695										79695
Zinder	NER.8_1	24703										24703	17292										17292
NIGERIA		2254403		347759072	1959330256		197	63960			18420	2309426308	1975583		35790853	1959330256		137	58304			12894	1997168027
Abia	NGA.1_1	631		4302427								4303058	441		3441941								3442382
Adamawa	NGA.2_1	2649										2649	1854										1854
Akwa Ibom	NGA.3_1			3177177								3177177			2541741								2541741
Bauchi	NGA.5_1	1419			0							1419	993			0							993
Bayelsa	NGA.6_1			896784	0							896784			717427	0							717427
Benue	NGA.7_1	32320										32320	22624										22624
Borno	NGA.8_1	11297										11297	7908										7908
Cross River	NGA.9_1	40628										40628	28441										28441
Delta	NGA.10_1	8459		309010297								309018756	5920		6971330								6977250
Ebonyi	NGA.11_1			7167				62459				69626			5017				57254				62271
Edo	NGA.12_1	5124		3244417			0	1501				3251042	3587		2594575			0	1050				2599212
Enugu	NGA.14_1	9049			0							9049	6334			0							6334
Federal Capital Territory	NGA.15_1	2207					175					2382	1545					122					1667
Gombe	NGA.16_1	14458			264672900							264687358	10120			264672900							264683020
Imo	NGA.17_1	788										788	552										552
Kaduna	NGA.19_1	624077										624077	570950										570950
Kano	NGA.20_1	29166										29166	20417										20417
Kogi	NGA.23_1	1227848		3832683								5060531	1122897		3066147								4189044
Lagos	NGA.25_1	184756		1184567			0					1369323	129331		938624			0					1067955
Niger	NGA.27_1	95			1658648848		1					1658648944	66			1658648848		1					1658648915
Ogun	NGA.25_1			1147								1147			803								803
Ogun	NGA.28_1	14663		5666854								5681517	10264		2388933								2399197
Ondo	NGA.29_1			3014902								3014902			2411921								2411921
Osun	NGA.30_1	2759					0					2759	1931					0					1931
Oyo	NGA.31_1	4730		573			21					5324	3311		401			14					3726
Plateau	NGA.32_1	6149			51593							57742	4304			51593							55897
Rivers	NGA.33_1	21672		13309549							18420	13349641	15171		10638413							12894	10666478
Sokoto	NGA.34_1	9459										9459	6622										6622
Taraba	NGA.35_1				35956915							35956915				35956915							35956915
Lagos	NGA.25_1			110528								110528			73580								73580
REUNION		710266	4346682		1499404	0	7363	1506679				8070394	538037	3042678		1499404	0	5154	1364921				6450194
Saint-Benoît	REU.1_1		2729312		907864	0	2848					3640024		1910519		907864	0	1994					2820377
Saint-Denis	REU.2_1	710163				0	1961					712124	537965				0	1372					539337
Saint-Paul	REU.3_1						190					190						134					134
Saint-Pierre	REU.4_1	103	1617370		591540		2364	1506679				3718056	72	1132159		591540		1654	1364921				3090346
RWANDA		64834		33317	2736990		3834	321				2839296	45384		23321	2736990		2684	225				2808604
Amajyaruguru	RWA.1_1				2142475							2142475				2142475							2142475
Amajyepfo	RWA.2_1	5628			441684							447312	3940			441684							445624
Iburasirazuba	RWA.3_1				6764		3802					10566				6764		2662					9426
Iburengerazuba	RWA.4_1			33317	121080							154397			23321	121080							144401
Umujyi wa Kigali	RWA.5_1	59206			0		32	321				59559	41444			0		22	225				41691
Amajyaruguru	RWA.1_1				24987							24987				24987							24987
SAO TOME & PRINCIPE		10100			297615							307715	7069			297615							304684
Príncipe	STP.1_1	216										216	151										151
São Tomé	STP.2_1	9884			297615							307499	6918			297615							304533
SENEGAL		1092275	1312054	11866		0	6577	16385			209067	2648224	785353	1202716	7899		0	4604	11470			74726	2086768
Dakar	SEN.1_1	623758		11866			107				207755	843486	457390		7899			75				73808	539172
Diourbel	SEN.2_1	5288										5288	3701										3701
Fatick	SEN.3_1	1936										1936	1356										1356
Kaffrine	SEN.4_1	2214										2214	1549										1549
Kaolack	SEN.5_1	133075					1136					134211	93152					795					93947
Kédougou	SEN.6_1	47596										47596	33318										33318
Kolda	SEN.7_1	6223										6223	4355										4355
Louga	SEN.8_1	1157					1067					2224	810					747					1557
Matam	SEN.9_1	1344										1344	941										941
Saint-Louis	SEN.10_1	10324					1067	16385				27776	7228					747	11470				19445
Sédhiou	SEN.11_1	1682										1682	1176										1176
Tambacounda	SEN.12_1	23907										23907	16736										16736
Thiès	SEN.13_1	200432	1312054			0	3200				1312	1516998	140303	1202716			0	2240				918	1346177
Ziguinchor	SEN.14_1	33339										33339	23338										23338
SEYCHELLES		156150				0						156150	109305				0						109305
Baie Sainte Anne	SYC.7_1	11969										11969	8378										8378
Grand' Anse	SYC.2_1					0						0					0						0
Mont Fleuri	SYC.9_1	83017										83017	58112										58112
Plaisance	SYC.9_1	61164										61164	42815										42815
SIERRA LEONE		21213			17403555			16742				17441510	14796			17403555			15341				17433692
Eastern	SLE.1_1	2797			1997202							1999999	1957			1997202							1999159
Northern	SLE.2_1	3671			15364585			16742				15384998	2569			15364585			15341				15382495
Southern	SLE.3_1	4341			41768							46109	3040			41768							44808
Western	SLE.4_1	10404										10404	7230										7230
SOMALIA		49456				0	1533					50989	34619				0	1073					35692
Banaadir	SOM.3_1						4					4						3					3
Bari	SOM.4_1	2948					229					3177	2064					160					2224
Mudug	SOM.11_1						55					55						39					39
Nugaal	SOM.12_1	1290				0						1290	903				0						903
Togdheer	SOM.17_1	8505					22					8527	5953					15					5968
Woqooyi Galbeed	SOM.18_1	36713					1223					37936	25699					856					26555
SOUTH AFRICA		122315	446949017	29229720	582753531	0	2103363	1061742		5173910	415358	1067808956	97651	348459454	23524915	582753531	0	1472360	832224		1552173	356887	959049195
Eastern Cape	ZAF.1_1	39110			437573	0	11376					488059	31284			437573	0	7964					476821
Eastern Cape	ZAF.2_1				404984453							404984453				404984453							404984453
Free State	ZAF.2_1	177	55161613		109503414		21349	55				164686608	124	43124456		109503414		14945	38				152642977
Gauteng	ZAF.3_1	13377	8553178	56106	0		1298	8328			331771	8964058	10552	6680124	39275	0		908	5827			288917	7025603
KwaZulu-Natal	ZAF.4_1	51793	1047743	2475002	58450365		2	859990			30482	62915377	41430	816972	2130647	58450365		1	675806			26545	62141766
Limpopo	ZAF.5_1	24	7451051				19513					7470588	17	5215736				13661					5229414
Mpumalanga	ZAF.6_1	16	374735432	28053	124516			193369				375081386	11	292622166	19637	124516			150553				292916883
North West	ZAF.7_1	207					244				28493	28944	145					171				24197	24513
Northern Cape	ZAF.8_1				14970	0	2016236					2031206				14970	0	1411370					1426340
Western Cape	ZAF.9_1	17611		26670559	9238240	0	33345			5173910	24612	41158277	14088		21335356	9238240	0	23340			1552173	17228	32180425
SOUTH SUDAN		73809			63520		194					137523	51666			63520		136					115322
Central Equatoria	SSD.1_1	60534			63520		10					124064	42374			63520		7					105901
Eastern Equatoria	SSD.2_1	1593										1593	1115										1115
Warap	SSD.8_1	6372					184					6556	4460					129					4589
West Equatoria	SSD.10_1	5310			0							5310	3717			0							3717
ST HELENA		2094				0	4					2098	1466				0	2					1468
Northern	SDN.10_1	952										952	666										666
Saint Helena	SHN.2_1	1142				0	4					1146	800				0	2					802
SUDAN		16482632		6756289	825268987		4	532036				849039948	12917897		3893184	825268987		3	487433				842567504
Al Jazirah	SDN.1_1							20568				20568							18854				18854
Al Qadarif	SDN.2_1				179094717							179094717				179094717							179094717
Blue Nile	SDN.3_1	3736			213818368							213822104	2614			213818368							213820982
East Darfur	SDN.5_1	20357										20357	14249										14249
Gao	MLI.2_1						4					4						3					3
Jungoli	SSD.3_1	1868										1868	1307										1307
Khartoum	SDN.1_1				7909418							7909418				7909418							7909418
Khartoum	SDN.7_1	9737146		5485871								15223017	6777820		2876850								9654670
North Darfur	SDN.8_1	14380										14380	10066										10066
North Kurdufan	SDN.9_1	19143										19143	13399										13399
Northern	SDN.10_1	28947			424178832							424207779	20263			424178832							424199095
Red Sea	SDN.11_1	7190		1270418								1277608	5033		1016334								1021367
River Nile	SDN.12_1	13353										13353	9347										9347
Sennar	SDN.13_1				267652			1227				268879				267652			859				268511
South Darfur	SDN.14_1	24278										24278	16994										16994
South Kurdufan	SDN.15_1	3736										3736	2614										2614
Unity	SSD.6_1	44182										44182	30927										30927
West Darfur	SDN.16_1	9991										9991	6994										6994
White Nile	SDN.18_1	6554325						510241				7064566	6006270						467720				6473990
SWAZILAND		7413			780245		3	1803940				2591601	5190			780245		2	1538302				2323739
Hhohho	SWZ.1_1	597			158808							159405	418			158808							159226
Lubombo	SWZ.2_1	97			0		3	1803940				1804040	68			0		2	1538302				1538372
Manzini	SWZ.3_1				621437							621437				621437							621437
Shiselweni	SWZ.4_1	6719										6719	4704										4704
TANZANIA		101562	1431	5310340	466108480		1094	4124960				475647867	73927	1002	4235124	466108480		764	298266				470717563
Dar es Salaam	TZA.2_1	35083	1431	5145052			6					5181572	27396	1002	4102894			4					4131296
Dodoma	TZA.3_1	2658										2658	1860										1860
Geita	TZA.4_1	11431										11431	8001										8001
Iringa	TZA.5_1				342487361			3826025				346313386				342487361			25987				342513348
Kagera	TZA.6_1	4808			0			139763				144571	3364			0			128117				131481
Katavi	TZA.7_1	330			0							330	231			0							231
Kigoma	TZA.8_1	2309			0		866					3175	1616			0		606					2222
Kilimanjaro	TZA.9_1				118179757			151119				118330876				118179757			138526				118318283
Kusini Pemba	TZA.19_1	2953										2953	2067										2067
Lindi	TZA.10_1	382			0							382	267			0							267
Manyara	TZA.11_1	242										242	170										170
Mara	TZA.12_1	4286										4286	3000										3000
Mbeya	TZA.13_1				0		24					24				0		17					17
Mjini Magharibi	TZA.30_1						2					2						1					1
Morogoro	TZA.14_1	7			4383290			7161				4390458	5			4383290			5012				4388307
Mtwara	TZA.15_1	1583		165288								166871	1108		132230								133338
Mwanza	TZA.16_1	19904					18					19922	13933					12					13945
Njombe	TZA.17_1	363			0			780				1143	254			0			546				800
Nkhata Bay	TZA.22_1	366			0							366	256			0							256
Pwani	TZA.20_1	242			0		0					242	170			0		0					170
Rukwa	TZA.21_1	1429			0							1429	1000			0							1000
Ruvuma	TZA.22_1	1400			785532		1	19				786952	980			785532		0	13				786525
Shinyanga	TZA.23_1	6611										6611	4627										4627
Songwe	TZA.31_1	2143					177					2320	1500					124					1624
Tabora	TZA.26_1	3032										3032	2122										2122
Tanga	TZA.27_1				272540			93				272633				272540			65				272605
TOGO		3699			30715884							30719583	2589			30715884							30718473
Maritime	TGO.3_1	3699										3699	2589										2589
Plateaux	TGO.4_1				30715884							30715884				30715884							30715884
TRISTAN DA CUNHA		874										874	612										612
TUNISIA		182481		26449191	5491410	0	4633					32127715	148858		21085676	5491410	0	3243					26729187
Adjumani	UGA.1_1	31										31	21										21
Ben Arous (Tunis Sud)	TUN.3_1	31458		116210								147668	20942		81347								102289
Bizerte	TUN.4_1			452244	0	0						452244			358003	0	0						358003
Béja	TUN.2_1				5457105							5457105				5457105							5457105
Gabès	TUN.5_1	4284		3572657								3576941	2999		2849264								2852263
Gafsa	TUN.6_1			814987								814987			649969								649969
Jendouba	TUN.7_1				18456							18456				18456							18456
Kassérine	TUN.9_1			2580068								2580068			2064055								2064055
Kusini Pemba	TZA.19_1			2807								2807			1965								1965
Le Kef	TUN.11_1				3791							3791				3791							3791
Mahdia	TUN.12_1			7585								7585			5310								5310
Manubah	TUN.13_1			5875775	12058							5887833			4700620	12058							4712678
Médenine	TUN.14_1	8853		574394								583247	6197		459516								465713
Monastir	TUN.15_1			337879								337879			234085								234085
Nabeul	TUN.16_1			509370								509370			405524								405524
Sfax	TUN.17_1	136061		3982104								4118165	117443		3183712								3301155
Siliana	TUN.19_1						7					7						5					5
Tataouine	TUN.21_1	81		44559			2313					46953	57		31191			1619					32867
Tozeur	TUN.22_1						2313					2313						1619					1619
Tunis	TUN.23_1	1713		2890807								2892520	1199		2312645								2313844
Zaghouan	TUN.24_1			4687745								4687745			3748470								3748470
UGANDA		4778564			10873712		8859	1308067				16969202	4761881			10873712		6200	1198467				16840260
Arua	UGA.3_1	149			0							149	104			0							104
Bundibugyo	UGA.5_1				423071							423071				423071							423071
Bushenyi	UGA.6_1				29823							29823				29823							29823
Gulu	UGA.8_1							2745				2745							1921				1921
Hoima	UGA.9_1				65759							65759				65759							65759
Jinja	UGA.11_1				1750901			666111				2417012				1750901			610602				2361503
Kabale	UGA.12_1				21750							21750				21750							21750
Kabarole	UGA.13_1				60958							60958				60958							60958
Kampala	UGA.16_1	14679										14679	10275										10275
Kamwenge	UGA.18_1				101759							101759				101759							101759
Kanungu	UGA.19_1	714			21745							22459	500			21745							22245
Kapchorwa	UGA.20_1	31			34989							35020	21			34989							35010
Kasese	UGA.21_1				168534							168534				168534							168534
Kayunga	UGA.23_1				7328993							7328993				7328993							7328993
Kibale	UGA.24_1	4722963										4722963	4722963										4722963
Kitgum	UGA.27_1	143										143	100										100
Masindi	UGA.36_1							522641				522641							479088				479088
Mayuge	UGA.37_1						1772	20496				22268						1240	18788				20028
Moroto	UGA.40_1	128										128	90										90
Moyo	UGA.41_1	31			0							31	21			0							21
Mpigi	UGA.42_1						3543					3543						2480					2480
Mukono	UGA.11_1				633810							633810				633810							633810
Mukono	UGA.44_1							96074				96074							88068				88068
Mukono	UGA.57_1	14279										14279	9995										9995
Nebbi	UGA.47_1	31			157641							157672	21			157641							157662
Pader	UGA.49_1				73979							73979				73979							73979
Rakai	UGA.51_1						0					0						0					0
Rukungiri	UGA.52_1				0							0				0							0
Soroti	UGA.55_1						1772					1772						1240					1240
Tororo	UGA.56_1	25416					1772					27188	17791					1240					19031
WESTERN SAHARA (MOROCCO)		37931				0	15604					53535	26552				0	10924					37476
Boujdour	ESH.1_1						2972					2972						2081					2081
Laayoune	ESH.3_1	37931				0	12632					50563	26552				0	8843					35395
ZAMBIA		20658	2409024		5259604900		1299	11460				5262047341	14458	2038031		5259604900		909	8022				5261666320
Central	ZMB.1_1				347874330							347874330				347874330							347874330
Copperbelt	ZMB.2_1	15620	113311		0		1299					130230	10934	88497		0		909					100340
Eastern	ZMB.3_1	729										729	510										510
Luapula	ZMB.4_1				901523							901523				901523							901523
Lusaka	ZMB.9_1				6294329							6294329				6294329							6294329
Manicaland	ZWE.3_1				0							0				0							0
Muchinga	ZMB.6_1				0							0				0							0
Northern	ZMB.8_1	798			511419							512217	558			511419							511977
North-Western	ZMB.7_1	1537			0							1537	1075			0							1075
Southern	ZMB.9_1		2295713		4904023299			11460				4906330472		1949534		4904023299			8022				4905980855
Tete	ZMB.5_1	141										141	98										98
Western	ZMB.10_1	1833			0		0					1833	1283			0		0					1283
ZIMBABWE		845	14960059		2001292		2	380022				17342220	591	13666483		2001292		1	343336				16011703
Harare	ZWE.2_1		146950									146950		114770									114770
Limpopo	ZAF.5_1	265										265	186										186
Manica	MOZ.4_1				0							0				0							0
Manicaland	ZWE.3_1				659595			6642				666237				659595			4650				664245
Mashonaland Central	ZWE.4_1				0							0				0							0
Mashonaland West	ZWE.6_1						2					2						1					1
Masvingo	ZWE.7_1	49			1341697			373380				1715126	34			1341697			338686				1680417
Matabeleland North	ZWE.8_1		14614294									14614294		13396436									13396436
Matabeleland South	ZWE.9_1	531										531	371										371
Midlands	ZWE.10_1		198815		0							198815		155277		0							155277
ZWE.6_1	Southern		198815									198815		155277									155277
Grand Total		505542832	486156030	9002544633	23037938011	0	13030064	54995459	1780524	5173910	736902	33107898365	43412416	382112264	335786722	23037938011	0	9121042	10554227	1218837	1552173	510347	23822206039

## Sheet: riverbasins
	WW in m3											WC in m3
	fossil fuels			renewables					other		total	fossil fuels			renewables					other		total
Hydrosheds river basin name or code	Oil	Coal	natural gas	Hydropower	Wind	Sun	Biomass	Geo	Uranium	waste heat		Oil	Coal	natural gas	Hydropower	Wind	Sun	Biomass	Geo	Uranium	waste heat
1040007000	397					46					443	278					32					310
1040007260	9795				0	22					9817	6856				0	15					6871
1040009450	2379			346870651		0	3829910				350702940	1665			346870651		0	28706				346901022
1040010030	2488			785532		1	19				788040	1742			785532		0	13				787287
1040010590	38			0							38	27			0							27
1040012680	16		484250	28179413			296683				28960362	11		338975	28179413			245258				28763657
1040012690	1080		23612	16403366		3	850016				17278077	756		16528	16403366		2	663872				17084524
1040012810	7328		2039362	736306			998241				3781237	5131		1775944	736306			915054				3432435
1040014490					0						0					0						0
1040018120	105348			31546333							31651681	73745			31546333							31620078
1040019180	50042			0							50042	35029			0							35029
1040019420	22861			321746166							321769027	16003			321746166							321762169
1040020240				67188							67188				67188							67188
1040020570	10888			161744							172632	7622			161744							169366
1040021500				872892							872892				872892							872892
1040021910	7709		7167	0			62459				77335	5396		5017	0			57254				67667
1040023890	595			0							595	416			0							416
1040023950				210820088			406				210820494				210820088			284				210820372
1040028700	94924					12632					107556	66447					8843					75290
1040028960				16860765		10037915					26898680				16860765		7026541					23887306
1040035400	440										440	308										308
1040035590	1130			0							1130	792			0							792
1041139430	1573			613108		45					614726	1101			613108		32					614241
1041145090	3390					36					3426	2374					25					2399
Bay al Kebir	6127										6127	4289										4289
Betsiboka	119968			0							119968	89243			0							89243
Chelif	8045		8506819	0							8514864	5631		6805456	0							6811087
Congo	185194		8777748	436206295		866					445170103	129636		3131327	436206295		606					439467864
Gambia	83938										83938	58756										58756
Gouritz			9544335	0		19977					9564312			7635468	0		13984					7649452
Groot Vis					0						0					0						0
Lake Chad	962203		78149	3507245		2666					4550263	831861		54704	3507245		1866					4395676
Limpopo	9328	270143378	125577	103843923		19992	4376			24894	374171468	7256	210225705	87904	103843923		13996	3062			21678	314203524
Madasgacar	11390			10421							21811	7973			10421							18394
Medjerda			5875775	5491410		12312					11379497			4700620	5491410		8619					10200649
Moulouya		5298149	2898253	1215993		34917				26944	9474256		4775796	2318603	1215993		24442				18861	8353695
Niger	2480813	999328	14667370	2544280707		3103					2562431321	2134069	916050	9016568	2544280707		2172					2556349566
Nile	363401397		8358907805	1612684224	0	585540	41615593				10377194559	20946261		120156301	1612684224	0	409879	2105218				1756301883
Orange	6293	176181135	25975	514502837	0	2066323	4007			335370	693121940	4867	137713044	18183	514502837	0	1446430	2803			291436	653979600
Oum er Rbia	57			46170429			3065				46173551	40			46170429			2146				46172615
Sassandra				135523163							135523163				135523163							135523163
Sebou	50256614			4865316							55121930	789729			4865316							5655045
Senegal	112447			60542939		10984	16385				60682755	78714			60542939		7689	11470				60640812
Swakop		8605				855					9460		6023				599					6622
Tana	8070			199997142		8271					200013483	5649			199997142		5790					200008581
Ugab						872	757				1629						611	694				1305
Volta	265264		110528	7764238883		4422	132				7764619229	185680		73580	7764238883		3095	93				7764501331
Zam Zam	5331										5331	3732										3732
Zambezi	108356	17369083	22050	7578509948		1301	27056				7596037794	75848	15704514	15435	7578509948		910	18939				7594325594
other basins	87189576	16156352	590449858	1050683584	0	206963	7286354	1780524	5173910	349694	1759276815	17827483	12771132	179636109	1050683584	0	144864	6499361	1218837	1552173	178372	1270511915
Grand Total	505542832	486156030	9002544633	23037938011	0	13030064	54995459	1780524	5173910	736902	33107898365	43412416	382112264	335786722	23037938011	0	9121042	10554227	1218837	1552173	510347	23822206039
